# Supplementary material for: Identification of prognosis value and immune microenvironment features of ceRNAs in NSCLC with distinct gene mutation
Source: Aging (Albany NY). 2023 Jun 26;15(12):5873–86. doi: 10.18632/aging.204846 (PMC10333077; doi:10.18632/aging.204846)
Supplement: Supplementary Table 1 [file aging-15-204846-s001.xlsx]

## Sheet: LUAD
Supplementary Table 1. Clusters assigned to each sample of LUAD and LUSC.
ID	cluster
TCGA-05-4244-01A-01D-1105-08	1
TCGA-05-4249-01A-01D-1105-08	2
TCGA-05-4250-01A-01D-1105-08	3
TCGA-05-4382-01A-01D-1931-08	4
TCGA-05-4384-01A-01D-1753-08	5
TCGA-05-4389-01A-01D-1265-08	6
TCGA-05-4390-01A-02D-1753-08	1
TCGA-05-4395-01A-01D-1265-08	7
TCGA-05-4397-01A-01D-1265-08	8
TCGA-05-4398-01A-01D-1265-08	9
TCGA-05-4403-01A-01D-1265-08	10
TCGA-05-4405-01A-21D-1855-08	9
TCGA-05-4410-01A-21D-1855-08	2
TCGA-05-4415-01A-22D-1855-08	11
TCGA-05-4417-01A-22D-1855-08	1
TCGA-05-4418-01A-01D-1265-08	7
TCGA-05-4420-01A-01D-1265-08	9
TCGA-05-4422-01A-01D-1265-08	6
TCGA-05-4424-01A-22D-1855-08	7
TCGA-05-4425-01A-01D-1753-08	6
TCGA-05-4426-01A-01D-1265-08	12
TCGA-05-4427-01A-21D-1855-08	13
TCGA-05-4430-01A-02D-1265-08	6
TCGA-05-4432-01A-01D-1265-08	14
TCGA-05-4433-01A-22D-1855-08	3
TCGA-05-5420-01A-01D-1625-08	14
TCGA-05-5423-01A-01D-1625-08	15
TCGA-05-5425-01A-02D-1625-08	16
TCGA-05-5428-01A-01D-1625-08	2
TCGA-05-5715-01A-01D-1625-08	6
TCGA-17-Z000-01A-01W-0746-08	11
TCGA-17-Z001-01A-01W-0746-08	17
TCGA-17-Z003-01A-01W-0746-08	9
TCGA-17-Z005-01A-01W-0746-08	9
TCGA-17-Z007-01A-01W-0746-08	9
TCGA-17-Z010-01A-01W-0746-08	3
TCGA-17-Z011-01A-01W-0746-08	17
TCGA-17-Z013-01A-01W-0746-08	10
TCGA-17-Z014-01A-01W-0746-08	1
TCGA-17-Z015-01A-01W-0746-08	18
TCGA-17-Z016-01A-01W-0746-08	1
TCGA-17-Z017-01A-01W-0746-08	7
TCGA-17-Z018-01A-01W-0746-08	14
TCGA-17-Z020-01A-01W-0746-08	3
TCGA-17-Z022-01A-01W-0746-08	13
TCGA-17-Z023-01A-01W-0746-08	9
TCGA-17-Z026-01A-01W-0746-08	15
TCGA-17-Z027-01A-01W-0746-08	18
TCGA-17-Z028-01A-01W-0746-08	18
TCGA-17-Z030-01A-01W-0746-08	17
TCGA-17-Z031-01A-01W-0746-08	4
TCGA-17-Z036-01A-01W-0746-08	3
TCGA-17-Z042-01A-01W-0746-08	11
TCGA-17-Z043-01A-01W-0746-08	17
TCGA-17-Z044-01A-01W-0746-08	5
TCGA-17-Z045-01A-01W-0746-08	9
TCGA-17-Z047-01A-01W-0747-08	9
TCGA-17-Z049-01A-01W-0746-08	11
TCGA-17-Z050-01A-01W-0747-08	3
TCGA-17-Z052-01A-01W-0747-08	9
TCGA-17-Z053-01A-01W-0747-08	9
TCGA-17-Z055-01A-01W-0747-08	18
TCGA-17-Z056-01A-01W-0747-08	9
TCGA-17-Z057-01A-01W-0747-08	10
TCGA-17-Z059-01A-01W-0747-08	4
TCGA-17-Z060-01A-01W-0747-08	3
TCGA-17-Z061-01A-01W-0747-08	9
TCGA-17-Z062-01A-01W-0747-08	12
TCGA-35-3615-01A-01D-1040-01	16
TCGA-35-4123-01A-01D-1105-08	9
TCGA-35-5375-01A-01D-1625-08	11
TCGA-38-4627-01A-01D-1553-08	15
TCGA-38-4629-01A-02D-1265-08	14
TCGA-38-4630-01A-01D-1265-08	9
TCGA-38-4631-01A-01D-1753-08	14
TCGA-38-4632-01A-01D-1753-08	9
TCGA-38-6178-01A-11D-1753-08	9
TCGA-44-2655-01A-01D-1553-08	17
TCGA-44-2656-01A-41D-A27T-08	14
TCGA-44-2657-01A-01D-1105-08	10
TCGA-44-2659-01A-01D-0969-08	18
TCGA-44-2666-01A-41D-A27T-08	13
TCGA-44-2668-01A-01D-A271-08	8
TCGA-44-3396-01A-01D-1553-08	9
TCGA-44-3917-01A-01D-A271-08	17
TCGA-44-3918-01A-01D-A271-08	9
TCGA-44-4112-01A-31D-A27T-08	6
TCGA-44-5643-01A-01D-1625-08	8
TCGA-44-5644-01A-21D-2036-08	18
TCGA-44-5645-01A-51D-A27T-08	12
TCGA-44-6144-01A-11D-1753-08	16
TCGA-44-6145-01A-11D-1753-08	3
TCGA-44-6774-01A-21D-1855-08	9
TCGA-44-6775-01A-31D-A27T-08	18
TCGA-44-6776-01A-11D-1855-08	16
TCGA-44-6777-01A-11D-1855-08	9
TCGA-44-6778-01A-11D-1855-08	17
TCGA-44-6779-01A-11D-1855-08	17
TCGA-44-7659-01A-11D-2063-08	7
TCGA-44-7660-01A-11D-2063-08	11
TCGA-44-7661-01A-11D-2063-08	3
TCGA-44-7662-01A-11D-2063-08	9
TCGA-44-7667-01A-31D-2063-08	18
TCGA-44-7669-01A-21D-2063-08	11
TCGA-44-7670-01A-11D-2063-08	8
TCGA-44-7671-01A-11D-2063-08	10
TCGA-44-7672-01A-11D-2063-08	3
TCGA-44-8117-01A-11D-2238-08	7
TCGA-44-8119-01A-11D-2238-08	16
TCGA-44-8120-01A-11D-2238-08	9
TCGA-44-A479-01A-31D-A24D-08	14
TCGA-44-A47A-01A-21D-A24D-08	7
TCGA-44-A47F-01A-11D-A24D-08	3
TCGA-44-A47G-01A-21D-A24D-08	10
TCGA-44-A4SS-01A-11D-A24P-08	9
TCGA-44-A4SU-01A-11D-A24P-08	15
TCGA-49-4486-01A-01D-1265-08	17
TCGA-49-4487-01A-21D-1855-08	13
TCGA-49-4488-01A-01D-1753-08	18
TCGA-49-4490-01A-21D-1855-08	15
TCGA-49-4494-01A-01D-1265-08	15
TCGA-49-4505-01A-01D-1931-08	12
TCGA-49-4506-01A-01D-1265-08	17
TCGA-49-4507-01A-01D-1265-08	16
TCGA-49-4510-01A-01D-1265-08	1
TCGA-49-4514-01A-21D-1855-08	5
TCGA-49-6742-01A-11D-1855-08	14
TCGA-49-6743-01A-11D-1855-08	8
TCGA-49-6744-01A-11D-1855-08	13
TCGA-49-6745-01A-11D-1855-08	10
TCGA-49-6767-01A-11D-1855-08	14
TCGA-49-AAQV-01A-11D-A397-08	9
TCGA-49-AAR0-01A-21D-A397-08	16
TCGA-49-AAR2-01A-11D-A397-08	17
TCGA-49-AAR3-01A-11D-A410-08	17
TCGA-49-AAR4-01A-12D-A410-08	5
TCGA-49-AAR9-01A-21D-A410-08	12
TCGA-49-AARE-01A-11D-A410-08	11
TCGA-49-AARN-01A-21D-A410-08	13
TCGA-49-AARO-01A-12D-A410-08	18
TCGA-49-AARQ-01A-11D-A410-08	11
TCGA-4B-A93V-01A-11D-A397-08	16
TCGA-50-5045-01A-01D-1625-08	18
TCGA-50-5051-01A-21D-1855-08	17
TCGA-50-5066-01A-01D-1625-08	15
TCGA-50-5072-01A-21D-1855-08	14
TCGA-50-5930-01A-11D-1753-08	2
TCGA-50-5931-01A-11D-1753-08	9
TCGA-50-5932-01A-11D-1753-08	3
TCGA-50-5933-01A-11D-1753-08	10
TCGA-50-5936-01A-11D-1625-08	14
TCGA-50-5939-01A-11D-1625-08	17
TCGA-50-5941-01A-11D-1753-08	12
TCGA-50-5942-01A-21D-1753-08	13
TCGA-50-5944-01A-11D-1753-08	15
TCGA-50-5946-01A-11D-1753-08	2
TCGA-50-6590-01A-12D-1855-08	8
TCGA-50-6591-01A-11D-1753-08	15
TCGA-50-6592-01A-11D-1753-08	8
TCGA-50-6593-01A-11D-1753-08	9
TCGA-50-6594-01A-11D-1753-08	2
TCGA-50-6595-01A-12D-1855-08	15
TCGA-50-6673-01A-11D-1945-08	9
TCGA-50-7109-01A-11D-2036-08	16
TCGA-50-8457-01A-11D-2323-08	18
TCGA-50-8459-01A-11D-2323-08	3
TCGA-53-7624-01A-11D-2063-08	13
TCGA-53-7813-01A-11D-2167-08	1
TCGA-53-A4EZ-01A-12D-A24P-08	12
TCGA-55-1592-01A-01D-0969-08	18
TCGA-55-1594-01A-01D-1040-01	9
TCGA-55-1595-01A-01D-0969-08	1
TCGA-55-1596-01A-01D-1040-01	5
TCGA-55-5899-01A-11D-1625-08	17
TCGA-55-6543-01A-11D-1753-08	14
TCGA-55-6642-01A-11D-1855-08	1
TCGA-55-6712-01A-11D-1855-08	10
TCGA-55-6968-01A-11D-1945-08	11
TCGA-55-6969-01A-11D-1945-08	9
TCGA-55-6971-01A-11D-1945-08	18
TCGA-55-6972-01A-11D-1945-08	17
TCGA-55-6975-01A-11D-1945-08	14
TCGA-55-6979-01A-11D-1945-08	9
TCGA-55-6984-01A-11D-1945-08	3
TCGA-55-6985-01A-11D-1945-08	9
TCGA-55-6986-01A-11D-1945-08	1
TCGA-55-7227-01A-11D-2036-08	9
TCGA-55-7281-01A-11D-2036-08	7
TCGA-55-7283-01A-11D-2036-08	3
TCGA-55-7284-01B-11D-2238-08	3
TCGA-55-7570-01A-11D-2036-08	15
TCGA-55-7573-01A-11D-2036-08	15
TCGA-55-7574-01A-11D-2036-08	16
TCGA-55-7576-01A-11D-2063-08	3
TCGA-55-7725-01A-11D-2167-08	4
TCGA-55-7726-01A-11D-2167-08	3
TCGA-55-7727-01A-11D-2167-08	7
TCGA-55-7728-01A-11D-2184-08	3
TCGA-55-7815-01A-11D-2167-08	4
TCGA-55-7903-01A-11D-2167-08	2
TCGA-55-7907-01A-11D-2167-08	8
TCGA-55-7910-01A-11D-2167-08	3
TCGA-55-7911-01A-11D-2167-08	3
TCGA-55-7913-01B-11D-2238-08	2
TCGA-55-7914-01A-11D-2167-08	4
TCGA-55-7994-01A-11D-2184-08	18
TCGA-55-7995-01A-11D-2184-08	8
TCGA-55-8085-01A-11D-2238-08	17
TCGA-55-8087-01A-11D-2238-08	10
TCGA-55-8089-01A-11D-2238-08	12
TCGA-55-8090-01A-11D-2238-08	7
TCGA-55-8092-01A-11D-2238-08	2
TCGA-55-8094-01A-11D-2238-08	5
TCGA-55-8096-01A-11D-2238-08	15
TCGA-55-8097-01A-11D-2238-08	4
TCGA-55-8203-01A-11D-2238-08	16
TCGA-55-8204-01A-11D-2238-08	13
TCGA-55-8205-01A-11D-2238-08	18
TCGA-55-8207-01A-11D-2238-08	3
TCGA-55-8208-01A-11D-2238-08	11
TCGA-55-8299-01A-11D-2284-08	16
TCGA-55-8301-01A-11D-2284-08	18
TCGA-55-8302-01A-11D-2323-08	17
TCGA-55-8505-01A-11D-2393-08	17
TCGA-55-8506-01A-11D-2393-08	14
TCGA-55-8507-01A-11D-2393-08	9
TCGA-55-8508-01A-11D-2393-08	1
TCGA-55-8510-01A-11D-2393-08	17
TCGA-55-8511-01A-11D-2393-08	2
TCGA-55-8514-01A-11D-2393-08	3
TCGA-55-8614-01A-11D-2393-08	9
TCGA-55-8615-01A-11D-2393-08	16
TCGA-55-8616-01A-11D-2393-08	15
TCGA-55-8620-01A-11D-2393-08	7
TCGA-55-A48Y-01A-11D-A24D-08	6
TCGA-55-A48Z-01A-12D-A24P-08	11
TCGA-55-A490-01A-11D-A24D-08	4
TCGA-55-A491-01A-11D-A24D-08	7
TCGA-55-A492-01A-11D-A24D-08	12
TCGA-55-A493-01A-11D-A24D-08	9
TCGA-55-A494-01A-11D-A24P-08	3
TCGA-55-A4DF-01A-11D-A24D-08	14
TCGA-55-A4DG-01A-11D-A24D-08	18
TCGA-62-8394-01A-11D-2323-08	15
TCGA-62-8398-01A-11D-2323-08	1
TCGA-62-8399-01A-21D-2323-08	9
TCGA-62-8402-01A-11D-2323-08	14
TCGA-62-A46O-01A-11D-A24D-08	14
TCGA-62-A46P-01A-11D-A24D-08	13
TCGA-62-A46R-01A-11D-A24D-08	3
TCGA-62-A46S-01A-11D-A24D-08	16
TCGA-62-A46U-01A-11D-A24D-08	9
TCGA-62-A46Y-01A-11D-A24D-08	1
TCGA-62-A470-01A-11D-A24D-08	6
TCGA-62-A471-01A-12D-A24D-08	9
TCGA-62-A472-01A-11D-A24D-08	2
TCGA-64-1676-01A-01D-0969-08	7
TCGA-64-1677-01A-01W-0928-08	8
TCGA-64-1679-01A-21D-2063-08	18
TCGA-64-1681-01A-11D-2063-08	4
TCGA-64-5774-01A-01D-1625-08	1
TCGA-64-5775-01A-01D-1625-08	1
TCGA-64-5778-01A-01D-1625-08	3
TCGA-64-5781-01A-01D-1625-08	10
TCGA-67-3770-01A-01D-0969-08	15
TCGA-67-3771-01A-01D-1040-01	12
TCGA-67-3772-01A-01W-0928-08	15
TCGA-67-3773-01A-01D-1040-01	3
TCGA-67-3774-01A-01D-1040-01	16
TCGA-67-4679-01B-01D-1753-08	6
TCGA-67-6215-01A-11D-1753-08	1
TCGA-67-6216-01A-11D-1753-08	13
TCGA-67-6217-01A-11D-1753-08	15
TCGA-69-7760-01A-11D-2167-08	9
TCGA-69-7764-01A-11D-2167-08	18
TCGA-69-7765-01A-11D-2167-08	18
TCGA-69-7973-01A-11D-2184-08	3
TCGA-69-7974-01A-11D-2184-08	3
TCGA-69-7978-01A-11D-2184-08	3
TCGA-69-7979-01A-11D-2184-08	6
TCGA-69-7980-01A-11D-2184-08	3
TCGA-69-8253-01A-11D-2284-08	1
TCGA-69-8254-01A-11D-2284-08	7
TCGA-69-8255-01A-11D-2284-08	14
TCGA-71-8520-01A-11D-2393-08	15
TCGA-73-4658-01A-01D-1753-08	18
TCGA-73-4659-01A-01D-1265-08	1
TCGA-73-4662-01A-01D-1265-08	3
TCGA-73-4666-01A-01D-1265-08	5
TCGA-73-4670-01A-01D-1265-08	16
TCGA-73-4676-01A-01D-1753-08	13
TCGA-73-4677-01A-01D-1265-08	17
TCGA-73-7498-01A-12D-2184-08	7
TCGA-73-7499-01A-11D-2184-08	8
TCGA-73-A9RS-01A-11D-A410-08	12
TCGA-75-5122-01A-01D-1753-08	10
TCGA-75-5125-01A-01D-1753-08	9
TCGA-75-5126-01A-01D-1753-08	13
TCGA-75-5146-01A-01D-1625-08	2
TCGA-75-5147-01A-01D-1625-08	9
TCGA-75-6206-01A-11D-1753-08	17
TCGA-75-6207-01A-11D-1753-08	4
TCGA-75-6211-01A-11D-1753-08	18
TCGA-75-6214-01A-41D-1945-08	6
TCGA-75-7025-01A-12D-1945-08	13
TCGA-75-7027-01A-11D-1945-08	17
TCGA-75-7031-01A-11D-1945-08	16
TCGA-78-7145-01A-11D-2036-08	3
TCGA-78-7146-01A-11D-2036-08	8
TCGA-78-7147-01A-11D-2036-08	15
TCGA-78-7148-01A-11D-2036-08	7
TCGA-78-7149-01A-11D-2036-08	17
TCGA-78-7150-01A-21D-2036-08	13
TCGA-78-7153-01A-11D-2036-08	2
TCGA-78-7154-01A-11D-2036-08	17
TCGA-78-7155-01A-11D-2036-08	15
TCGA-78-7156-01A-11D-2036-08	4
TCGA-78-7158-01A-11D-2036-08	6
TCGA-78-7161-01A-11D-2036-08	16
TCGA-78-7162-01A-21D-2063-08	17
TCGA-78-7166-01A-12D-2063-08	16
TCGA-78-7167-01A-11D-2063-08	4
TCGA-78-7220-01A-11D-2036-08	7
TCGA-78-7535-01A-11D-2063-08	16
TCGA-78-7536-01A-11D-2063-08	18
TCGA-78-7537-01A-11D-2063-08	2
TCGA-78-7539-01A-11D-2063-08	2
TCGA-78-7540-01A-11D-2063-08	3
TCGA-78-7633-01A-11D-2063-08	2
TCGA-78-8640-01A-11D-2393-08	14
TCGA-78-8655-01A-11D-2393-08	3
TCGA-78-8660-01A-11D-2393-08	14
TCGA-78-8662-01A-11D-2393-08	2
TCGA-80-5607-01A-31D-1945-08	8
TCGA-80-5608-01A-31D-1945-08	1
TCGA-80-5611-01A-01D-1625-08	14
TCGA-83-5908-01A-21D-2284-08	3
TCGA-86-6851-01A-11D-1945-08	9
TCGA-86-7701-01A-11D-2167-08	9
TCGA-86-7711-01A-11D-2063-08	14
TCGA-86-7713-01A-11D-2063-08	16
TCGA-86-7714-01A-12D-2167-08	8
TCGA-86-7953-01A-11D-2184-08	3
TCGA-86-7954-01A-11D-2184-08	9
TCGA-86-8054-01A-11D-2238-08	1
TCGA-86-8055-01A-11D-2238-08	15
TCGA-86-8056-01A-11D-2238-08	11
TCGA-86-8073-01A-11D-2238-08	10
TCGA-86-8074-01A-11D-2238-08	9
TCGA-86-8075-01A-11D-2238-08	15
TCGA-86-8278-01A-11D-2284-08	4
TCGA-86-8279-01A-11D-2284-08	18
TCGA-86-8280-01A-11D-2284-08	6
TCGA-86-8281-01A-11D-2284-08	14
TCGA-86-8358-01A-11D-2323-08	10
TCGA-86-8359-01A-11D-2323-08	16
TCGA-86-8585-01A-11D-2393-08	12
TCGA-86-8668-01A-11D-2393-08	15
TCGA-86-8669-01A-11D-2393-08	18
TCGA-86-8672-01A-21D-2393-08	12
TCGA-86-8673-01A-11D-2393-08	9
TCGA-86-8674-01A-21D-2393-08	17
TCGA-86-A4JF-01A-11D-A24P-08	5
TCGA-91-6828-01A-11D-1855-08	3
TCGA-91-6829-01A-21D-1855-08	18
TCGA-91-6831-01A-11D-1855-08	4
TCGA-91-6835-01A-11D-1855-08	18
TCGA-91-6836-01A-21D-1855-08	3
TCGA-91-6840-01A-11D-1945-08	9
TCGA-91-6847-01A-11D-1945-08	9
TCGA-91-6848-01A-11D-1945-08	13
TCGA-91-6849-01A-11D-1945-08	17
TCGA-91-A4BC-01A-11D-A24D-08	9
TCGA-91-A4BD-01A-11D-A24D-08	2
TCGA-93-7348-01A-21D-2036-08	10
TCGA-93-8067-01A-11D-2284-08	12
TCGA-93-A4JN-01A-11D-A24P-08	11
TCGA-93-A4JO-01A-21D-A24P-08	3
TCGA-93-A4JP-01A-11D-A24P-08	11
TCGA-95-7039-01A-11D-1945-08	2
TCGA-95-7043-01A-11D-1945-08	18
TCGA-95-7562-01A-11D-2238-08	11
TCGA-95-7567-01A-11D-2063-08	3
TCGA-95-7944-01A-11D-2184-08	9
TCGA-95-7947-01A-11D-2184-08	8
TCGA-95-7948-01A-11D-2184-08	8
TCGA-95-8039-01A-11D-2238-08	9
TCGA-95-8494-01A-11D-2323-08	9
TCGA-95-A4VN-01A-11D-A25L-08	3
TCGA-95-A4VP-01A-21D-A25L-08	3
TCGA-97-7547-01A-11D-2036-08	18
TCGA-97-7553-01A-21D-2036-08	11
TCGA-97-7554-01A-11D-2036-08	3
TCGA-97-7937-01A-11D-2167-08	10
TCGA-97-7938-01A-11D-2167-08	4
TCGA-97-7941-01A-11D-2184-08	13
TCGA-97-8171-01A-11D-2284-08	6
TCGA-97-8175-01A-11D-2284-08	14
TCGA-97-8176-01A-11D-2393-08	10
TCGA-97-8177-01A-11D-2284-08	8
TCGA-97-8179-01A-11D-2284-08	16
TCGA-97-8552-01A-11D-2393-08	8
TCGA-97-A4M0-01A-11D-A24P-08	3
TCGA-97-A4M3-01A-11D-A24P-08	1
TCGA-97-A4M6-01A-11D-A24P-08	13
TCGA-97-A4M7-01A-11D-A24P-08	13
TCGA-99-7458-01A-11D-2036-08	9
TCGA-99-8025-01A-11D-2238-08	4
TCGA-99-8028-01A-11D-2238-08	3
TCGA-99-8032-01A-11D-2238-08	16
TCGA-99-8033-01A-11D-2238-08	17
TCGA-J2-8194-01A-11D-2238-08	16
TCGA-J2-A4AD-01A-11D-A24D-08	14
TCGA-L4-A4E5-01A-11D-A24P-08	4
TCGA-L9-A443-01A-12D-A24D-08	1
TCGA-L9-A444-01A-21D-A24D-08	18
TCGA-L9-A50W-01A-12D-A397-08	15
TCGA-L9-A5IP-01A-21D-A397-08	18
TCGA-L9-A743-01A-43D-A397-08	18
TCGA-L9-A7SV-01A-11D-A397-08	9
TCGA-L9-A8F4-01A-11D-A397-08	9
TCGA-MN-A4N1-01A-11D-A24P-08	2
TCGA-MN-A4N4-01A-12D-A24P-08	4
TCGA-MN-A4N5-01A-11D-A24P-08	3
TCGA-MP-A4SV-01A-11D-A24P-08	9
TCGA-MP-A4SW-01A-21D-A24P-08	15
TCGA-MP-A4SY-01A-21D-A24P-08	14
TCGA-MP-A4T7-01A-11D-A24P-08	17
TCGA-MP-A4T8-01A-11D-A24P-08	3
TCGA-MP-A4T9-01A-11D-A24P-08	15
TCGA-MP-A4TA-01A-21D-A24P-08	14
TCGA-MP-A4TC-01A-11D-A24P-08	4
TCGA-MP-A4TD-01A-32D-A25L-08	12
TCGA-MP-A4TE-01A-22D-A25L-08	16
TCGA-MP-A4TF-01A-11D-A25L-08	16
TCGA-MP-A4TI-01A-21D-A24P-08	8
TCGA-MP-A4TJ-01A-51D-A25L-08	1
TCGA-MP-A4TK-01A-11D-A24P-08	9
TCGA-MP-A5C7-01A-11D-A25L-08	17
TCGA-NJ-A4YF-01A-12D-A25L-08	16
TCGA-NJ-A4YG-01A-22D-A25L-08	3
TCGA-NJ-A4YI-01A-11D-A25L-08	3
TCGA-NJ-A4YP-01A-11D-A25L-08	1
TCGA-NJ-A4YQ-01A-11D-A25L-08	14
TCGA-NJ-A55O-01A-11D-A25L-08	3
TCGA-NJ-A55R-01A-11D-A25L-08	16
TCGA-O1-A52J-01A-11D-A25L-08	9

## Sheet: LUSC
ID	cluster
TCGA-18-3406-01A-01D-0983-08	1
TCGA-18-3407-01A-01D-0983-08	2
TCGA-18-3408-01A-01D-0983-08	1
TCGA-18-3409-01A-01D-0983-08	3
TCGA-18-3410-01A-01D-0983-08	1
TCGA-18-3411-01A-01D-0983-08	4
TCGA-18-3412-01A-01D-0983-08	1
TCGA-18-3414-01A-01D-0983-08	5
TCGA-18-3415-01A-01D-0983-08	1
TCGA-18-3416-01A-01D-0983-08	6
TCGA-18-3417-01A-01D-1441-08	7
TCGA-18-3419-01A-01D-0983-08	8
TCGA-18-3421-01A-01D-0983-08	7
TCGA-18-4083-01A-01D-1352-08	9
TCGA-18-4086-01A-01D-1352-08	10
TCGA-18-4721-01A-01D-1441-08	11
TCGA-18-5592-01A-01D-1632-08	12
TCGA-18-5595-01A-01D-1632-08	9
TCGA-21-1070-01A-01D-1521-08	13
TCGA-21-1071-01A-01D-1521-08	1
TCGA-21-1075-01A-01W-0782-08	1
TCGA-21-1076-01A-02D-1521-08	13
TCGA-21-1077-01A-01D-1521-08	1
TCGA-21-1078-01A-01D-1521-08	9
TCGA-21-1079-01A-01W-0782-08	8
TCGA-21-1080-01A-01W-0782-08	14
TCGA-21-1081-01A-01D-1521-08	1
TCGA-21-1083-01A-01D-1521-08	14
TCGA-21-5782-01A-01D-1632-08	14
TCGA-21-5783-01A-41D-2184-08	5
TCGA-21-5784-01A-01D-1632-08	1
TCGA-21-5786-01A-01D-1632-08	3
TCGA-21-5787-01A-01D-1632-08	12
TCGA-21-A5DI-01A-31D-A26M-08	13
TCGA-22-0940-01A-01D-1521-08	2
TCGA-22-0944-01A-01D-1521-08	1
TCGA-22-1000-01A-01D-1521-08	10
TCGA-22-1002-01A-01D-1521-08	15
TCGA-22-1005-01A-01D-1521-08	1
TCGA-22-1012-01A-01D-1521-08	9
TCGA-22-1016-01A-01D-1521-08	12
TCGA-22-4591-01A-01D-1267-08	1
TCGA-22-4593-01A-21D-1817-08	2
TCGA-22-4594-01A-01D-1267-08	1
TCGA-22-4595-01A-01D-1267-08	3
TCGA-22-4599-01A-01D-1441-08	2
TCGA-22-4601-01A-01D-1441-08	1
TCGA-22-4604-01A-01D-1267-08	9
TCGA-22-4605-01A-21D-2122-08	1
TCGA-22-4607-01A-01D-1267-08	1
TCGA-22-4613-01A-01D-1441-08	2
TCGA-22-5472-01A-01D-1632-08	1
TCGA-22-5473-01A-01D-1632-08	15
TCGA-22-5474-01A-01D-1632-08	1
TCGA-22-5477-01A-01D-1632-08	2
TCGA-22-5478-01A-01D-1632-08	1
TCGA-22-5479-01A-31D-1945-08	1
TCGA-22-5480-01A-01D-1632-08	1
TCGA-22-5481-01A-31D-1945-08	10
TCGA-22-5482-01A-01D-1632-08	15
TCGA-22-5483-01A-01D-1817-08	4
TCGA-22-5485-01A-01D-1632-08	12
TCGA-22-5489-01A-01D-1632-08	15
TCGA-22-5491-01A-01D-1632-08	12
TCGA-22-5492-01A-01D-1632-08	12
TCGA-22-A5C4-01A-12D-A27K-08	1
TCGA-33-4532-01A-01D-1267-08	1
TCGA-33-4533-01A-01D-1267-08	10
TCGA-33-4538-01A-01D-1267-08	4
TCGA-33-4547-01A-01D-1267-08	1
TCGA-33-4566-01A-01D-1441-08	1
TCGA-33-4582-01A-01D-1441-08	1
TCGA-33-4583-01A-01D-1441-08	12
TCGA-33-4586-01A-01D-1441-08	4
TCGA-33-4587-01A-11D-2122-08	10
TCGA-33-4589-01A-01D-1441-08	2
TCGA-33-6737-01A-11D-1817-08	1
TCGA-33-6738-01A-11D-1945-08	1
TCGA-33-A4WN-01A-11D-A25L-08	6
TCGA-33-A5GW-01A-11D-A27K-08	9
TCGA-33-AAS8-01A-11D-A401-08	1
TCGA-33-AASB-01A-11D-A401-08	3
TCGA-33-AASD-01A-11D-A401-08	12
TCGA-33-AASI-01A-22D-A401-08	13
TCGA-33-AASJ-01A-11D-A401-08	9
TCGA-33-AASL-01A-11D-A401-08	1
TCGA-34-2596-01A-01D-1522-08	2
TCGA-34-2600-01A-01D-1522-08	5
TCGA-34-2604-01A-01D-1522-08	1
TCGA-34-2605-01A-01D-1522-08	7
TCGA-34-2608-01A-02D-1522-08	1
TCGA-34-2609-01A-01D-1522-08	11
TCGA-34-5231-01A-21D-1817-08	15
TCGA-34-5232-01A-21D-1817-08	1
TCGA-34-5234-01A-01D-1632-08	1
TCGA-34-5236-01A-21D-1817-08	1
TCGA-34-5239-01A-21D-1817-08	1
TCGA-34-5240-01A-01D-1441-08	5
TCGA-34-5241-01A-01D-1441-08	1
TCGA-34-5927-01A-11D-1817-08	1
TCGA-34-5928-01A-11D-1817-08	11
TCGA-34-5929-01A-11D-1817-08	1
TCGA-34-7107-01A-11D-1945-08	1
TCGA-34-8454-01A-11D-2323-08	15
TCGA-34-8455-01A-11D-2323-08	1
TCGA-34-A5IX-01A-12D-A27K-08	1
TCGA-37-3783-01A-01D-1267-08	3
TCGA-37-3789-01A-01D-0983-08	8
TCGA-37-3792-01A-01D-0983-08	10
TCGA-37-4130-01A-01D-1352-08	9
TCGA-37-4132-01A-01D-1352-08	10
TCGA-37-4133-01A-01D-1352-08	1
TCGA-37-4135-01A-01D-1352-08	2
TCGA-37-4141-01A-02D-1352-08	11
TCGA-37-5819-01A-01D-1632-08	8
TCGA-37-A5EL-01A-11D-A26M-08	1
TCGA-37-A5EM-01A-21D-A27K-08	10
TCGA-37-A5EN-01A-21D-A26M-08	1
TCGA-39-5011-01A-01D-1441-08	1
TCGA-39-5016-01A-01D-1441-08	11
TCGA-39-5021-01A-01D-1441-08	11
TCGA-39-5022-01A-21D-1817-08	1
TCGA-39-5024-01A-21D-1817-08	7
TCGA-39-5027-01A-21D-1817-08	1
TCGA-39-5028-01A-01D-1441-08	2
TCGA-39-5031-01A-01D-1441-08	15
TCGA-39-5034-01A-01D-1441-08	11
TCGA-39-5035-01A-01D-1441-08	1
TCGA-39-5036-01A-01D-1441-08	1
TCGA-39-5037-01A-01D-1441-08	16
TCGA-39-5039-01A-01D-1441-08	16
TCGA-39-5040-01A-21D-2122-08	9
TCGA-43-2576-01A-01D-1522-08	1
TCGA-43-2578-01A-01D-1522-08	10
TCGA-43-2581-01A-01D-1522-08	1
TCGA-43-3394-01A-01D-0983-08	16
TCGA-43-3920-01A-01D-0983-08	7
TCGA-43-5668-01A-01D-1632-08	1
TCGA-43-5670-01A-21D-2122-08	16
TCGA-43-6143-01A-11D-1817-08	1
TCGA-43-6770-01A-11D-1817-08	1
TCGA-43-7656-01A-11D-2122-08	1
TCGA-43-7658-01A-11D-2122-08	1
TCGA-43-8115-01A-11D-2244-08	3
TCGA-43-8116-01A-11D-2244-08	1
TCGA-43-8118-01A-11D-2395-08	12
TCGA-43-A474-01A-11D-A24D-08	4
TCGA-43-A475-01A-11D-A24D-08	1
TCGA-43-A56U-01A-11D-A26M-08	16
TCGA-43-A56V-01A-11D-A26M-08	1
TCGA-46-3765-01A-01D-0983-08	2
TCGA-46-3767-01A-01D-0983-08	1
TCGA-46-3768-01A-01D-0983-08	1
TCGA-46-3769-01A-01D-0983-08	1
TCGA-46-6025-01A-11D-1817-08	2
TCGA-46-6026-01A-11D-1817-08	1
TCGA-51-4079-01A-01D-1458-08	12
TCGA-51-4080-01A-01D-1458-08	2
TCGA-51-4081-01A-01D-1458-08	9
TCGA-51-6867-01A-11D-2042-08	4
TCGA-52-7622-01A-11D-2122-08	14
TCGA-52-7809-01A-21D-2122-08	16
TCGA-52-7810-01A-11D-2122-08	1
TCGA-52-7811-01A-11D-2122-08	1
TCGA-52-7812-01A-11D-2122-08	1
TCGA-56-1622-01A-01D-1521-08	3
TCGA-56-5897-01A-11D-1632-08	7
TCGA-56-5898-01A-11D-1632-08	1
TCGA-56-6545-01A-11D-1817-08	1
TCGA-56-6546-01A-11D-1817-08	7
TCGA-56-7221-01A-11D-2042-08	9
TCGA-56-7222-01A-11D-2042-08	14
TCGA-56-7223-01A-11D-2042-08	11
TCGA-56-7579-01A-11D-2042-08	1
TCGA-56-7580-01A-11D-2042-08	16
TCGA-56-7582-01A-11D-2042-08	1
TCGA-56-7730-01A-11D-2122-08	3
TCGA-56-7731-01A-11D-2122-08	2
TCGA-56-7822-01A-11D-2122-08	1
TCGA-56-7823-01B-11D-2244-08	9
TCGA-56-8201-01A-11D-2244-08	1
TCGA-56-8304-01A-11D-2323-08	16
TCGA-56-8305-01A-11D-2293-08	1
TCGA-56-8307-01A-11D-2293-08	4
TCGA-56-8308-01A-11D-2293-08	1
TCGA-56-8309-01A-11D-2293-08	7
TCGA-56-8503-01A-11D-2395-08	1
TCGA-56-8504-01A-11D-2395-08	7
TCGA-56-8622-01A-11D-2395-08	12
TCGA-56-8624-01A-11D-2395-08	10
TCGA-56-8625-01A-11D-2395-08	1
TCGA-56-8626-01A-11D-2395-08	1
TCGA-56-8629-01A-11D-2395-08	1
TCGA-56-A49D-01A-11D-A24D-08	15
TCGA-56-A4BW-01A-11D-A24D-08	14
TCGA-56-A4BX-01A-11D-A24D-08	10
TCGA-56-A4BY-01A-11D-A24D-08	1
TCGA-56-A4ZK-01A-11D-A25L-08	1
TCGA-56-A5DR-01A-11D-A27K-08	8
TCGA-56-A5DS-01A-11D-A27K-08	1
TCGA-56-A62T-01A-11D-A401-08	16
TCGA-58-8386-01A-11D-2293-08	1
TCGA-58-8387-01A-11D-2293-08	5
TCGA-58-8388-01A-11D-2323-08	6
TCGA-58-8390-01A-11D-2323-08	14
TCGA-58-8391-01A-11D-2323-08	1
TCGA-58-8392-01A-11D-2323-08	7
TCGA-58-8393-01A-11D-2323-08	1
TCGA-58-A46J-01A-11D-A24D-08	13
TCGA-58-A46K-01A-11D-A24D-08	1
TCGA-58-A46M-01A-11D-A24D-08	1
TCGA-58-A46N-01A-11D-A24D-08	2
TCGA-60-2695-01A-01D-1522-08	1
TCGA-60-2698-01A-01D-1522-08	8
TCGA-60-2703-01A-11D-2042-08	1
TCGA-60-2704-01A-11D-2042-08	15
TCGA-60-2707-01A-01D-1522-08	7
TCGA-60-2708-01A-01D-1522-08	1
TCGA-60-2709-01A-21D-1817-08	14
TCGA-60-2710-01A-01D-1522-08	14
TCGA-60-2712-01A-01D-1522-08	1
TCGA-60-2714-01A-01D-1522-08	11
TCGA-60-2715-01A-01D-1522-08	1
TCGA-60-2719-01A-01D-1522-08	1
TCGA-60-2720-01A-01D-1522-08	16
TCGA-60-2721-01A-01D-1522-08	1
TCGA-60-2722-01A-01D-1522-08	9
TCGA-60-2723-01A-01D-1522-08	1
TCGA-60-2724-01A-01D-1522-08	4
TCGA-60-2725-01A-01D-1267-08	2
TCGA-60-2726-01A-01D-1522-08	1
TCGA-63-5128-01A-01D-1441-08	16
TCGA-63-5131-01A-01D-1441-08	1
TCGA-63-6202-01A-11D-1817-08	16
TCGA-63-7020-01A-11D-1945-08	1
TCGA-63-7021-01A-11D-1945-08	1
TCGA-63-7023-01A-11D-1945-08	1
TCGA-63-A5M9-01A-11D-A26M-08	2
TCGA-63-A5MB-01A-11D-A26M-08	1
TCGA-63-A5MG-01A-12D-A27K-08	1
TCGA-63-A5MH-01A-12D-A27K-08	7
TCGA-63-A5MJ-01A-11D-A27K-08	1
TCGA-63-A5ML-01A-31D-A27K-08	1
TCGA-63-A5MM-01A-11D-A26M-08	1
TCGA-63-A5MP-01A-11D-A26M-08	1
TCGA-63-A5MR-01A-31D-A27K-08	12
TCGA-63-A5MS-01A-11D-A26M-08	2
TCGA-63-A5MT-01A-21D-A26M-08	13
TCGA-63-A5MU-01A-11D-A26M-08	1
TCGA-63-A5MW-01A-11D-A26M-08	16
TCGA-63-A5MY-01A-11D-A26M-08	15
TCGA-66-2727-01A-01D-0983-08	1
TCGA-66-2734-01A-01D-0983-08	1
TCGA-66-2742-01A-01D-0983-08	4
TCGA-66-2744-01A-01D-0983-08	1
TCGA-66-2754-01A-01D-0983-08	10
TCGA-66-2755-01A-01D-1522-08	1
TCGA-66-2756-01A-01D-1522-08	16
TCGA-66-2757-01A-01D-1522-08	1
TCGA-66-2758-01A-02D-1522-08	5
TCGA-66-2759-01A-01D-1522-08	12
TCGA-66-2763-01A-01D-1522-08	3
TCGA-66-2765-01A-01D-1522-08	1
TCGA-66-2766-01A-01D-1522-08	1
TCGA-66-2768-01A-01W-0877-08	1
TCGA-66-2770-01A-01D-1522-08	12
TCGA-66-2771-01A-01D-0983-08	1
TCGA-66-2773-01A-01D-1267-08	3
TCGA-66-2777-01A-01D-1267-08	1
TCGA-66-2780-01A-01D-1522-08	14
TCGA-66-2782-01A-01D-1522-08	6
TCGA-66-2783-01A-01D-1267-08	6
TCGA-66-2785-01A-01D-1522-08	6
TCGA-66-2786-01A-01D-1522-08	2
TCGA-66-2787-01A-01D-0983-08	2
TCGA-66-2788-01A-01D-0983-08	1
TCGA-66-2789-01A-01D-0983-08	12
TCGA-66-2791-01A-01D-0983-08	4
TCGA-66-2792-01A-01D-0983-08	2
TCGA-66-2793-01A-01D-1267-08	1
TCGA-66-2794-01A-01D-1267-08	1
TCGA-66-2795-01A-02D-0983-08	4
TCGA-66-2800-01A-01D-1267-08	1
TCGA-68-7755-01A-11D-2122-08	9
TCGA-68-7756-01A-11D-2122-08	1
TCGA-68-7757-01B-11D-2293-08	7
TCGA-68-8250-01A-11D-2293-08	1
TCGA-68-8251-01A-11D-2293-08	11
TCGA-68-A59J-01A-21D-A26M-08	2
TCGA-6A-AB49-01A-12D-A401-08	3
TCGA-70-6722-01A-11D-1817-08	1
TCGA-70-6723-01A-11D-1817-08	1
TCGA-77-6842-01A-11D-1945-08	7
TCGA-77-6843-01A-11D-1945-08	1
TCGA-77-6844-01A-11D-1945-08	1
TCGA-77-6845-01A-11D-1945-08	1
TCGA-77-7139-01A-11D-2042-08	12
TCGA-77-7140-01A-41D-2042-08	1
TCGA-77-7141-01A-11D-2042-08	14
TCGA-77-7142-01A-11D-2042-08	1
TCGA-77-7335-01A-11D-2042-08	6
TCGA-77-7337-01A-21D-2042-08	1
TCGA-77-7338-01A-11D-2042-08	2
TCGA-77-7463-01A-11D-2042-08	11
TCGA-77-7465-01A-11D-2042-08	15
TCGA-77-8007-01A-11D-2184-08	13
TCGA-77-8008-01A-21D-2184-08	1
TCGA-77-8009-01A-11D-2184-08	1
TCGA-77-8128-01A-11D-2244-08	12
TCGA-77-8130-01A-11D-2244-08	1
TCGA-77-8131-01A-11D-2244-08	1
TCGA-77-8133-01A-12D-2244-08	2
TCGA-77-8136-01A-11D-2244-08	14
TCGA-77-8138-01A-11D-2244-08	11
TCGA-77-8139-01A-11D-2244-08	12
TCGA-77-8140-01A-11D-2244-08	1
TCGA-77-8143-01A-11D-2244-08	7
TCGA-77-8144-01A-11D-2244-08	1
TCGA-77-8145-01A-11D-2244-08	1
TCGA-77-8146-01A-11D-2244-08	13
TCGA-77-8148-01A-11D-2244-08	1
TCGA-77-8150-01A-11D-2244-08	11
TCGA-77-8153-01A-11D-2395-08	10
TCGA-77-8154-01A-11D-2244-08	1
TCGA-77-8156-01A-11D-2244-08	1
TCGA-77-A5G1-01A-11D-A27K-08	13
TCGA-77-A5G3-01A-31D-A27K-08	1
TCGA-77-A5G6-01A-11D-A27K-08	12
TCGA-77-A5G8-01B-11D-A27K-08	1
TCGA-77-A5GA-01A-11D-A27K-08	1
TCGA-77-A5GB-01B-11D-A27K-08	7
TCGA-77-A5GF-01A-21D-A27K-08	16
TCGA-77-A5GH-01A-11D-A27K-08	1
TCGA-79-5596-01A-31D-1945-08	1
TCGA-85-6175-01A-11D-1817-08	1
TCGA-85-6560-01A-11D-1817-08	6
TCGA-85-6561-01A-11D-1817-08	1
TCGA-85-6798-01A-11D-1945-08	1
TCGA-85-7696-01A-11D-2122-08	15
TCGA-85-7697-01A-11D-2122-08	9
TCGA-85-7698-01A-11D-2122-08	1
TCGA-85-7699-01A-11D-2122-08	3
TCGA-85-7710-01A-11D-2122-08	10
TCGA-85-7843-01A-11D-2122-08	1
TCGA-85-7844-01A-11D-2122-08	1
TCGA-85-7950-01A-11D-2184-08	1
TCGA-85-8048-01A-11D-2244-08	2
TCGA-85-8049-01A-11D-2244-08	1
TCGA-85-8052-01A-11D-2244-08	13
TCGA-85-8070-01A-11D-2244-08	1
TCGA-85-8071-01A-11D-2244-08	2
TCGA-85-8072-01A-31D-2244-08	1
TCGA-85-8276-01A-11D-2293-08	4
TCGA-85-8277-01A-11D-2293-08	12
TCGA-85-8287-01A-11D-2293-08	15
TCGA-85-8350-01A-11D-2293-08	2
TCGA-85-8351-01A-11D-2293-08	1
TCGA-85-8352-01A-31D-2323-08	13
TCGA-85-8353-01A-21D-2293-08	1
TCGA-85-8354-01A-31D-2323-08	15
TCGA-85-8355-01A-11D-2293-08	16
TCGA-85-8479-01A-11D-2323-08	1
TCGA-85-8580-01A-31D-2395-08	1
TCGA-85-8582-01A-21D-2395-08	6
TCGA-85-8664-01A-11D-2395-08	2
TCGA-85-8666-01A-11D-2395-08	11
TCGA-85-A4CL-01A-41D-A26M-08	6
TCGA-85-A4CN-01A-11D-A24D-08	11
TCGA-85-A4JB-01A-51D-A25L-08	1
TCGA-85-A4JC-01A-11D-A257-08	15
TCGA-85-A4QQ-01A-41D-A25L-08	1
TCGA-85-A4QR-01A-11D-A257-08	2
TCGA-85-A50M-01A-21D-A25L-08	2
TCGA-85-A50Z-01A-21D-A25L-08	7
TCGA-85-A510-01A-11D-A26M-08	10
TCGA-85-A511-01A-21D-A25L-08	1
TCGA-85-A512-01A-11D-A26M-08	9
TCGA-85-A53L-01A-21D-A26M-08	1
TCGA-85-A5B5-01A-21D-A26M-08	9
TCGA-90-7766-01A-21D-2122-08	1
TCGA-90-7767-01A-11D-2122-08	4
TCGA-90-7769-01A-11D-2122-08	2
TCGA-90-7964-01A-21D-2184-08	1
TCGA-90-A4ED-01A-31D-A257-08	6
TCGA-90-A4EE-01A-11D-A257-08	1
TCGA-92-7340-01A-21D-2042-08	1
TCGA-92-7341-01A-31D-2042-08	1
TCGA-92-8063-01A-11D-2244-08	13
TCGA-92-8064-01A-11D-2244-08	12
TCGA-92-8065-01A-11D-2244-08	1
TCGA-94-7033-01A-11D-1945-08	7
TCGA-94-7557-01A-11D-2122-08	3
TCGA-94-7943-01A-11D-2184-08	1
TCGA-94-8035-01A-11D-2244-08	4
TCGA-94-8490-01A-11D-2323-08	3
TCGA-94-8491-01A-11D-2323-08	1
TCGA-94-A4VJ-01A-11D-A257-08	12
TCGA-94-A5I4-01A-11D-A26M-08	2
TCGA-94-A5I6-01A-21D-A27K-08	2
TCGA-96-7544-01A-11D-2042-08	1
TCGA-96-7545-01A-21D-2042-08	1
TCGA-96-8169-01A-11D-2293-08	13
TCGA-96-8170-01A-11D-2293-08	1
TCGA-96-A4JK-01A-11D-A257-08	9
TCGA-96-A4JL-01A-11D-A257-08	1
TCGA-98-8020-01A-11D-2244-08	1
TCGA-98-8021-01A-11D-2244-08	7
TCGA-98-8022-01A-11D-2244-08	12
TCGA-98-8023-01A-11D-2244-08	1
TCGA-98-A538-01A-11D-A25L-08	15
TCGA-98-A539-01A-31D-A25L-08	1
TCGA-98-A53B-01A-11D-A25L-08	1
TCGA-98-A53I-01A-31D-A25L-08	2
TCGA-98-A53J-01A-11D-A26M-08	6
TCGA-J1-A4AH-01A-31D-A24D-08	1
TCGA-L3-A4E7-01A-11D-A257-08	1
TCGA-L3-A524-01A-11D-A25L-08	1
TCGA-LA-A446-01A-21D-A257-08	15
TCGA-MF-A522-01A-11D-A25L-08	9
TCGA-NC-A5HD-01A-11D-A26M-08	1
TCGA-NC-A5HE-01A-11D-A26M-08	6
TCGA-NC-A5HF-01A-11D-A26M-08	1
TCGA-NC-A5HG-01A-11D-A26M-08	16
TCGA-NC-A5HH-01A-11D-A26M-08	14
TCGA-NC-A5HI-01A-11D-A26M-08	1
TCGA-NC-A5HK-01A-11D-A26M-08	2
TCGA-NC-A5HL-01A-11D-A26M-08	1
TCGA-NC-A5HM-01A-12D-A26M-08	13
TCGA-NC-A5HN-01A-11D-A26M-08	1
TCGA-NC-A5HO-01A-11D-A26M-08	2
TCGA-NC-A5HP-01A-11D-A26M-08	2
TCGA-NC-A5HQ-01A-11D-A26M-08	1
TCGA-NC-A5HR-01A-21D-A26M-08	4
TCGA-NC-A5HT-01A-11D-A26M-08	1
TCGA-NK-A5CR-01A-11D-A26M-08	1
TCGA-NK-A5CT-01A-31D-A26M-08	16
TCGA-NK-A5CX-01A-11D-A26M-08	15
TCGA-NK-A5D1-01A-11D-A26M-08	1
TCGA-NK-A7XE-01A-12D-A401-08	1
TCGA-O2-A52N-01A-11D-A26M-08	4
TCGA-O2-A52Q-01A-11D-A26M-08	3
TCGA-O2-A52S-01A-11D-A25L-08	11
TCGA-O2-A52V-01A-31D-A25L-08	9
TCGA-O2-A52W-01A-11D-A26M-08	1
TCGA-O2-A5IB-01A-11D-A27K-08	10
TCGA-XC-AA0X-01A-32D-A401-08	1
