# Supplementary material for: Identification of prognosis value and immune microenvironment features of ceRNAs in NSCLC with distinct gene mutation
Source: Aging (Albany NY). 2023 Jun 26;15(12):5873–86. doi: 10.18632/aging.204846 (PMC10333077; doi:10.18632/aging.204846)
Supplement: Supplementary Table 2 [file aging-15-204846-s002.xlsx]

## Sheet: Sheet1
Supplementary Table 2. The immune-related mRNA, miRNA and lncRNAs collected from previous studies.
lncRNAs.signatures	miRNA.signatures	mRNA.signatures
LINC00116	hsa-mir-16-1 // hsa-mir-16-2	B2M
P2RX5-TAX1BP3	hsa-mir-103-2 // hsa-mir-103-1	RPS16
ENSG00000267058	hsa-mir-24-2 // hsa-mir-24-1	RPL31
ENSG00000268001	hsa-mir-107	RPS11 /// SNORD35B
FAM30A	hsa-mir-191	ND4
LOC286437	hsa-mir-23a	LOC101928826 /// TPT1
LOC100132287	hsa-mir-26a-2 // hsa-mir-26a-1	RPS27A
ENSG00000282508	hsa-mir-17	OAZ1
LOC100132062	hsa-mir-1826	FTL
ENSG00000230724	hsa-mir-93	MALAT1
LOC100133331	hsa-mir-106a	UBC
LOC729737	hsa-mir-20a	ACTB /// ACTG1
ENSG00000260735	hsa-mir-92a-1 // hsa-mir-92a-2	VIM
LINC01000	hsa-mir-768	ACTB
ENSG00000235989	hsa-mir-181a-1 // hsa-mir-181a-2	S100A6
ENSG00000204282	hsa-mir-185	LAPTM5
ENSG00000271856	hsa-mir-320a	PTPRC
ENSG00000253352	hsa-mir-320b-1 // hsa-mir-320b-2	GAPDH
ENSG00000232628	hsa-mir-140	RPS9
ENSG00000218510		ARPC2
HCG26		HLA-E
MGC27345		RPS29
ENSG00000182057		HSPA8 /// SNORD14C /// SNORD14D
ENSG00000213599		ACTR2
MMP24-AS1		DDX5 /// MIR3064 /// MIR5047
ENSG00000245060		ITM2B
ENSG00000251022		PTP4A2
ENSG00000236423		PFDN5
ENSG00000282851		GNAS
RAB4B-EGLN2		COX4I1
ENSG00000178977		MYL12A /// MYL12B
ENSG00000225733		PCBP2
CHKB-CPT1B		ALDOA
MIA-RAB4B		GABARAP
LOC729683		DDX17
ENSG00000260260		ARHGDIB
ENSG00000265148		PGK1
ENSG00000280634		PABPC1 /// RLIM
ENSG00000245954		CD53
ENSG00000241990		PRELID1
ENSG00000196756		CORO1A
ENSG00000228106		CYBA
ENSG00000267100		H2AFY
MROH7-TTC4		SH3BGRL
ENSG00000204261		ARL6IP5
ENSG00000277147		MCL1
ENSG00000228315		LCP1
ENSG00000206337		EIF4G2
LOC100996255		C17orf49 /// RNASEK /// RNASEK-C17orf49
ENSG00000264247		GDI2
TOPORS-AS1		RTN4
ENSG00000268996		BTG1
ENSG00000247982		SELL
EEF1E1-BLOC1S5		ATP5L
LOC103021295		HNRNPC
NCBP2-AS2		YWHAB
ENSG00000247556		HCLS1
ENSG00000265479		MBNL1
ENSG00000197180		TGOLN2
ATP2B1-AS1		ZFAND5
ATP6V1G2-DDX39B		CCNI
SPECC1L-ADORA2A		HNRNPA2B1
ENSG00000223745		CNBP
ENSG00000258791		HIF1A
ENSG00000197989		SLC25A3
ENSG00000232956		ZFP36L2
ENSG00000260032		EIF1
ENSG00000272752		ZFAS1
SERF2-C15ORF63		RAC2
TMEM256-PLSCR3		C14orf2
ENSG00000281649		SF3B1
ENSG00000278970		WSB1
ENSG00000163597		CALM1 /// CALM2 /// CALM3
LOC100289333		PSMB4
ENSG00000266402		ATP6V0E1
ENSG00000226950		SARAF
ENSG00000254635		DAZAP2
ENSG00000234741		PTBP3
ENSG00000240567		IQGAP1
LINC00493		KLF6
ENSG00000203875		TMBIM6
BLOC1S5-TXNDC5		PSMA7
LOC100506136		COX7A2
ENSG00000255717		LRRFIP1
SENP3-EIF4A1		JTB
ENSG00000224032		JUND
ENSG00000177410		SH3KBP1
ENSG00000269893		ARF1 /// MIR3620
RNASEK-C17orf49		PSMB1
ENSG00000251562		PRKAR1A
ENSG00000245910		MRFAP1
		SON
		PSME1
		CAPZB
		STAT6
		MKNK2
		CELF2
		LOC101928189 /// RSRP1
		ATP6V1G1
		STK4
		ELF1
		RHOA
		WAC
		UQCR11
		STK24
		SNX3
		OSBPL8
		MAPK1
		ADD3
		CXCR4
		GNB1
		SLC38A2
		YPEL5
		LOC100507217
		PRKCB
		PAIP2
		TRMT112
		PNISR
		GHITM
		CCNL1
		ARGLU1
		JAK1
		ARHGAP9
		ELOVL5
		TAF10
		APBB1IP
		ACTR3
		CDC42SE2
		ADAR
		TAX1BP1
		RASSF5
		PPP1CA
		YY1
		CIRBP
		BCLAF1
		SCAF11
		MAT2B
		STAG2
		RBM5
		FAM65B
		SRSF5
		TRAPPC8
		CCND3
		LITAF
		BRD2
		SP110
