# Supplementary material for: Identification of prognosis value and immune microenvironment features of ceRNAs in NSCLC with distinct gene mutation
Source: Aging (Albany NY). 2023 Jun 26;15(12):5873–86. doi: 10.18632/aging.204846 (PMC10333077; doi:10.18632/aging.204846)
Supplement: Supplementary Table 3 [file aging-15-204846-s003.xlsx]

## Sheet: Supplementary table3
Supplementary Table 3. The result of GO enrichment analysis for immune-related mRNAs.
ONTOLOGY	ID	Description	GeneRatio	BgRatio	pvalue	p.adjust	qvalue	geneID	Count
GO:1903311	BP	GO:1903311	regulation of mRNA metabolic process	19/125	344/18866	1.28978e-12	3.44758e-09	2.79543e-09	SRSF5/RBM5/CIRBP/CELF2/PSME1/SON/PSMB1/PSMA7/PTBP3/PSMB4/ZFP36L2/HNRNPA2B1/MBNL1/YWHAB/HNRNPC/DDX17/VIM/UBC/RPS27A	19
GO:0043484	BP	GO:0043484	regulation of RNA splicing	11/125	156/18866	7.15273e-09	7.2525e-06	5.8806e-06	SRSF5/RBM5/CIRBP/SLC38A2/CELF2/SON/TMBIM6/PTBP3/HNRNPA2B1/MBNL1/DDX17	11
GO:0070482	BP	GO:0070482	response to oxygen levels	16/125	396/18866	8.13973e-09	7.2525e-06	5.8806e-06	GNB1/CXCR4/RHOA/ATP6V1G1/PSME1/PSMB1/PSMA7/TMBIM6/PSMB4/HIF1A/CYBA/PGK1/UBC/MALAT1/RPS27A/ND4	16
GO:0001666	BP	GO:0001666	response to hypoxia	15/125	359/18866	1.58106e-08	1.05654e-05	8.56684e-06	GNB1/CXCR4/RHOA/PSME1/PSMB1/PSMA7/TMBIM6/PSMB4/HIF1A/CYBA/PGK1/UBC/MALAT1/RPS27A/ND4	15
GO:0036293	BP	GO:0036293	response to decreased oxygen levels	15/125	371/18866	2.44633e-08	1.30086e-05	1.05478e-05	GNB1/CXCR4/RHOA/PSME1/PSMB1/PSMA7/TMBIM6/PSMB4/HIF1A/CYBA/PGK1/UBC/MALAT1/RPS27A/ND4	15
GO:0006402	BP	GO:0006402	mRNA catabolic process	15/125	376/18866	2.91999e-08	1.30086e-05	1.05478e-05	CIRBP/PSME1/PSMB1/PSMA7/PSMB4/ZFP36L2/YWHAB/HNRNPC/RPS29/RPS9/VIM/UBC/RPS27A/RPL31/RPS16	15
GO:0043488	BP	GO:0043488	regulation of mRNA stability	11/125	186/18866	4.44648e-08	1.69792e-05	1.37674e-05	CIRBP/PSME1/PSMB1/PSMA7/PSMB4/ZFP36L2/YWHAB/HNRNPC/VIM/UBC/RPS27A	11
GO:0071453	BP	GO:0071453	cellular response to oxygen levels	12/125	235/18866	5.3696e-08	1.75293e-05	1.42135e-05	GNB1/ATP6V1G1/PSME1/PSMB1/PSMA7/TMBIM6/PSMB4/HIF1A/PGK1/UBC/MALAT1/RPS27A	12
GO:0048024	BP	GO:0048024	regulation of mRNA splicing	via spliceosome	9/125	113/18866	6.15519e-08	1.75293e-05	1.42135e-05	SRSF5/RBM5/CIRBP/CELF2/SON/PTBP3/HNRNPA2B1/MBNL1/DDX17	9
GO:0043620	BP	GO:0043620	regulation of DNA-templated transcription in response to stress	9/125	115/18866	7.17021e-08	1.75293e-05	1.42135e-05	BCLAF1/PSME1/PSMB1/PSMA7/TMBIM6/PSMB4/HIF1A/UBC/RPS27A	9
GO:0043487	BP	GO:0043487	regulation of RNA stability	11/125	195/18866	7.21372e-08	1.75293e-05	1.42135e-05	CIRBP/PSME1/PSMB1/PSMA7/PSMB4/ZFP36L2/YWHAB/HNRNPC/VIM/UBC/RPS27A	11
GO:0006401	BP	GO:0006401	RNA catabolic process	15/125	415/18866	1.06209e-07	2.3658e-05	1.91828e-05	CIRBP/PSME1/PSMB1/PSMA7/PSMB4/ZFP36L2/YWHAB/HNRNPC/RPS29/RPS9/VIM/UBC/RPS27A/RPL31/RPS16	15
GO:0061013	BP	GO:0061013	regulation of mRNA catabolic process	11/125	208/18866	1.38993e-07	2.65377e-05	2.15177e-05	CIRBP/PSME1/PSMB1/PSMA7/PSMB4/ZFP36L2/YWHAB/HNRNPC/VIM/UBC/RPS27A	11
GO:0071456	BP	GO:0071456	cellular response to hypoxia	11/125	208/18866	1.38993e-07	2.65377e-05	2.15177e-05	GNB1/PSME1/PSMB1/PSMA7/TMBIM6/PSMB4/HIF1A/PGK1/UBC/MALAT1/RPS27A	11
GO:0036294	BP	GO:0036294	cellular response to decreased oxygen levels	11/125	218/18866	2.2315e-07	3.97653e-05	3.22432e-05	GNB1/PSME1/PSMB1/PSMA7/TMBIM6/PSMB4/HIF1A/PGK1/UBC/MALAT1/RPS27A	11
GO:0016579	BP	GO:0016579	protein deubiquitination	12/125	283/18866	4.01686e-07	6.71066e-05	5.44126e-05	YY1/TAF10/SNX3/RHOA/PSME1/PSMB1/PSMA7/PSMB4/HIF1A/ACTB/UBC/RPS27A	12
GO:0043618	BP	GO:0043618	regulation of transcription from RNA polymerase II promoter in response to stress	8/125	109/18866	6.43573e-07	9.48117e-05	7.68769e-05	PSME1/PSMB1/PSMA7/TMBIM6/PSMB4/HIF1A/UBC/RPS27A	8
GO:0002479	BP	GO:0002479	antigen processing and presentation of exogenous peptide antigen via MHC class I	TAP-dependent	7/125	75/18866	6.4664e-07	9.48117e-05	7.68769e-05	PSME1/PSMB1/PSMA7/PSMB4/CYBA/HLA-E/B2M	7
GO:0070646	BP	GO:0070646	protein modification by small protein removal	12/125	300/18866	7.45939e-07	9.48117e-05	7.68769e-05	YY1/TAF10/SNX3/RHOA/PSME1/PSMB1/PSMA7/PSMB4/HIF1A/ACTB/UBC/RPS27A	12
GO:0061418	BP	GO:0061418	regulation of transcription from RNA polymerase II promoter in response to hypoxia	7/125	77/18866	7.74935e-07	9.48117e-05	7.68769e-05	PSME1/PSMB1/PSMA7/PSMB4/HIF1A/UBC/RPS27A	7
GO:0050684	BP	GO:0050684	regulation of mRNA processing	9/125	152/18866	7.78687e-07	9.48117e-05	7.68769e-05	SRSF5/RBM5/CIRBP/CELF2/SON/PTBP3/HNRNPA2B1/MBNL1/DDX17	9
GO:0008380	BP	GO:0008380	RNA splicing	15/125	487/18866	8.15814e-07	9.48117e-05	7.68769e-05	SRSF5/RBM5/SCAF11/CIRBP/SLC38A2/CELF2/SON/TMBIM6/PTBP3/SF3B1/HNRNPA2B1/MBNL1/HNRNPC/DDX17/PCBP2	15
GO:0043312	BP	GO:0043312	neutrophil degranulation	15/125	487/18866	8.15814e-07	9.48117e-05	7.68769e-05	ARHGAP9/YPEL5/MAPK1/RHOA/PSMB1/IQGAP1/SELL/GDI2/CYBA/CD53/ALDOA/ACTR2/PTPRC/FTL/B2M	15
GO:0002283	BP	GO:0002283	neutrophil activation involved in immune response	15/125	490/18866	8.80953e-07	9.81161e-05	7.95562e-05	ARHGAP9/YPEL5/MAPK1/RHOA/PSMB1/IQGAP1/SELL/GDI2/CYBA/CD53/ALDOA/ACTR2/PTPRC/FTL/B2M	15
GO:0042590	BP	GO:0042590	antigen processing and presentation of exogenous peptide antigen via MHC class I	7/125	80/18866	1.00701e-06	0.000107669	8.73024e-05	PSME1/PSMB1/PSMA7/PSMB4/CYBA/HLA-E/B2M	7
GO:0006417	BP	GO:0006417	regulation of translation	14/125	450/18866	1.73164e-06	0.000178026	0.00014435	CIRBP/PPP1CA/PAIP2/MAPK1/RHOA/MKNK2/PTBP3/EIF1/ZFP36L2/CNBP/EIF4G2/RPS9/GAPDH/VIM	14
GO:0000377	BP	GO:0000377	RNA splicing	via transesterification reactions with bulged adenosine as nucleophile	13/125	390/18866	1.95101e-06	0.000186252	0.00015102	SRSF5/RBM5/SCAF11/CIRBP/CELF2/SON/PTBP3/SF3B1/HNRNPA2B1/MBNL1/HNRNPC/DDX17/PCBP2	13
GO:0000398	BP	GO:0000398	mRNA splicing	via spliceosome	13/125	390/18866	1.95101e-06	0.000186252	0.00015102	SRSF5/RBM5/SCAF11/CIRBP/CELF2/SON/PTBP3/SF3B1/HNRNPA2B1/MBNL1/HNRNPC/DDX17/PCBP2	13
GO:0000375	BP	GO:0000375	RNA splicing	via transesterification reactions	13/125	393/18866	2.123e-06	0.000195682	0.000158666	SRSF5/RBM5/SCAF11/CIRBP/CELF2/SON/PTBP3/SF3B1/HNRNPA2B1/MBNL1/HNRNPC/DDX17/PCBP2	13
GO:0002474	BP	GO:0002474	antigen processing and presentation of peptide antigen via MHC class I	7/125	99/18866	4.25332e-06	0.000378971	0.000307284	PSME1/PSMB1/PSMA7/PSMB4/CYBA/HLA-E/B2M	7
GO:0038093	BP	GO:0038093	Fc receptor signaling pathway	10/125	241/18866	4.71434e-06	0.000406498	0.000329603	ACTR3/MAPK1/PSME1/PSMB1/PSMA7/PSMB4/ACTR2/ARPC2/PTPRC/ACTB	10
GO:0010591	BP	GO:0010591	regulation of lamellipodium assembly	5/125	38/18866	4.96377e-06	0.00041463	0.000336197	ACTR3/CAPZB/RAC2/ACTR2/ARPC2	5
GO:0006413	BP	GO:0006413	translational initiation	9/125	192/18866	5.37544e-06	0.00043541	0.000353047	PPP1CA/PAIP2/EIF1/EIF4G2/RPS29/RPS9/RPS27A/RPL31/RPS16	9
GO:0070555	BP	GO:0070555	response to interleukin-1	9/125	211/18866	1.15107e-05	0.000904946	0.000733764	YY1/PSME1/PSMB1/PSMA7/PSMB4/HIF1A/CYBA/UBC/RPS27A	9
GO:0031145	BP	GO:0031145	anaphase-promoting complex-dependent catabolic process	6/125	83/18866	1.86563e-05	0.00142053	0.00115182	PSME1/PSMB1/PSMA7/PSMB4/UBC/RPS27A	6
GO:0042110	BP	GO:0042110	T cell activation	13/125	483/18866	1.94932e-05	0.00142053	0.00115182	CCND3/APBB1IP/RHOA/STAT6/PRKAR1A/RAC2/ZFP36L2/LCP1/CORO1A/PRELID1/HLA-E/PTPRC/B2M	13
GO:1902743	BP	GO:1902743	regulation of lamellipodium organization	5/125	50/18866	1.96632e-05	0.00142053	0.00115182	ACTR3/CAPZB/RAC2/ACTR2/ARPC2	5
GO:0010592	BP	GO:0010592	positive regulation of lamellipodium assembly	4/125	25/18866	2.08575e-05	0.00143636	0.00116465	ACTR3/RAC2/ACTR2/ARPC2	4
GO:0030833	BP	GO:0030833	regulation of actin filament polymerization	8/125	174/18866	2.0957e-05	0.00143636	0.00116465	ACTR3/ADD3/RHOA/CAPZB/HCLS1/CORO1A/ACTR2/ARPC2	8
GO:0002478	BP	GO:0002478	antigen processing and presentation of exogenous peptide antigen	8/125	177/18866	2.37011e-05	0.00158383	0.00128423	CAPZB/PSME1/PSMB1/PSMA7/PSMB4/CYBA/HLA-E/B2M	8
GO:1903706	BP	GO:1903706	regulation of hemopoiesis	13/125	498/18866	2.6817e-05	0.00174834	0.00141762	PRKCB/RHOA/PSME1/PSMB1/PSMA7/PSMB4/ZFP36L2/HIF1A/HCLS1/PRELID1/GNAS/PTPRC/B2M	13
GO:0032956	BP	GO:0032956	regulation of actin cytoskeleton organization	11/125	360/18866	2.79315e-05	0.00177764	0.00144138	ACTR3/ADD3/RHOA/CAPZB/IQGAP1/RAC2/HCLS1/CORO1A/ARHGDIB/ACTR2/ARPC2	11
GO:0071347	BP	GO:0071347	cellular response to interleukin-1	8/125	183/18866	3.01002e-05	0.00187111	0.00151717	YY1/PSME1/PSMB1/PSMA7/PSMB4/HIF1A/UBC/RPS27A	8
GO:0007015	BP	GO:0007015	actin filament organization	12/125	434/18866	3.18578e-05	0.00193232	0.0015668	ACTR3/ADD3/RHOA/CAPZB/SH3KBP1/RAC2/HCLS1/LCP1/CORO1A/ALDOA/ACTR2/ARPC2	12
GO:0019884	BP	GO:0019884	antigen processing and presentation of exogenous antigen	8/125	185/18866	3.25307e-05	0.00193232	0.0015668	CAPZB/PSME1/PSMB1/PSMA7/PSMB4/CYBA/HLA-E/B2M	8
GO:0008064	BP	GO:0008064	regulation of actin polymerization or depolymerization	8/125	190/18866	3.9335e-05	0.0022857	0.00185333	ACTR3/ADD3/RHOA/CAPZB/HCLS1/CORO1A/ACTR2/ARPC2	8
GO:0030832	BP	GO:0030832	regulation of actin filament length	8/125	191/18866	4.08293e-05	0.00232206	0.00188281	ACTR3/ADD3/RHOA/CAPZB/HCLS1/CORO1A/ACTR2/ARPC2	8
GO:0030041	BP	GO:0030041	actin filament polymerization	8/125	193/18866	4.39606e-05	0.00244805	0.00198497	ACTR3/ADD3/RHOA/CAPZB/HCLS1/CORO1A/ACTR2/ARPC2	8
GO:0048002	BP	GO:0048002	antigen processing and presentation of peptide antigen	8/125	194/18866	4.55998e-05	0.00248752	0.00201697	CAPZB/PSME1/PSMB1/PSMA7/PSMB4/CYBA/HLA-E/B2M	8
GO:0006909	BP	GO:0006909	phagocytosis	11/125	382/18866	4.78854e-05	0.00255995	0.0020757	CDC42SE2/ACTR3/MAPK1/SNX3/RAC2/CYBA/CORO1A/ACTR2/ARPC2/PTPRC/ACTB	11
GO:0006521	BP	GO:0006521	regulation of cellular amino acid metabolic process	5/125	63/18866	6.08995e-05	0.00319185	0.00258807	PSME1/PSMB1/PSMA7/PSMB4/OAZ1	5
GO:0070498	BP	GO:0070498	interleukin-1-mediated signaling pathway	6/125	103/18866	6.3453e-05	0.00326173	0.00264473	PSME1/PSMB1/PSMA7/PSMB4/UBC/RPS27A	6
GO:1902745	BP	GO:1902745	positive regulation of lamellipodium organization	4/125	33/18866	6.476e-05	0.0032661	0.00264828	ACTR3/RAC2/ACTR2/ARPC2	4
GO:0032970	BP	GO:0032970	regulation of actin filament-based process	11/125	405/18866	8.0828e-05	0.00400099	0.00324415	ACTR3/ADD3/RHOA/CAPZB/IQGAP1/RAC2/HCLS1/CORO1A/ARHGDIB/ACTR2/ARPC2	11
GO:0002429	BP	GO:0002429	immune response-activating cell surface receptor signaling pathway	12/125	481/18866	8.54972e-05	0.00408096	0.003309	ACTR3/PRKCB/MAPK1/ELF1/PSME1/PSMB1/PSMA7/PSMB4/ACTR2/ARPC2/PTPRC/ACTB	12
GO:0002757	BP	GO:0002757	immune response-activating signal transduction	12/125	481/18866	8.54972e-05	0.00408096	0.003309	ACTR3/PRKCB/MAPK1/ELF1/PSME1/PSMB1/PSMA7/PSMB4/ACTR2/ARPC2/PTPRC/ACTB	12
GO:0030032	BP	GO:0030032	lamellipodium assembly	5/125	69/18866	9.43368e-05	0.0044239	0.00358706	ACTR3/CAPZB/RAC2/ACTR2/ARPC2	5
GO:0071902	BP	GO:0071902	positive regulation of protein serine/threonine kinase activity	10/125	345/18866	0.000101315	0.00466923	0.00378599	CCND3/CXCR4/MAPK1/RHOA/STK4/IQGAP1/DAZAP2/PTPRC/UBC/RPS27A	10
GO:0008154	BP	GO:0008154	actin polymerization or depolymerization	8/125	221/18866	0.00011352	0.00514305	0.00417017	ACTR3/ADD3/RHOA/CAPZB/HCLS1/CORO1A/ACTR2/ARPC2	8
GO:0000381	BP	GO:0000381	regulation of alternative mRNA splicing	via spliceosome	5/125	76/18866	0.000149457	0.00665829	0.00539879	SRSF5/RBM5/CELF2/MBNL1/DDX17	5
GO:0032271	BP	GO:0032271	regulation of protein polymerization	8/125	231/18866	0.000153961	0.0067465	0.00547032	ACTR3/ADD3/RHOA/CAPZB/HCLS1/CORO1A/ACTR2/ARPC2	8
GO:0019882	BP	GO:0019882	antigen processing and presentation	8/125	232/18866	0.000158586	0.0068371	0.00554377	CAPZB/PSME1/PSMB1/PSMA7/PSMB4/CYBA/HLA-E/B2M	8
GO:0008631	BP	GO:0008631	intrinsic apoptotic signaling pathway in response to oxidative stress	4/125	43/18866	0.00018557	0.00787347	0.00638411	STK24/HIF1A/MCL1/ARL6IP5	4
GO:0043434	BP	GO:0043434	response to peptide hormone	11/125	447/18866	0.000191926	0.0080159	0.00649959	CCND3/SRSF5/PRKCB/OSBPL8/ATP6V1G1/STAT6/PRKAR1A/JUND/IQGAP1/ATP6V0E1/CYBA	11
GO:0033238	BP	GO:0033238	regulation of cellular amine metabolic process	5/125	81/18866	0.00020188	0.00830192	0.00673151	PSME1/PSMB1/PSMA7/PSMB4/OAZ1	5
GO:0071346	BP	GO:0071346	cellular response to interferon-gamma	7/125	182/18866	0.000212146	0.00859191	0.00696664	ACTR3/JAK1/ACTR2/HLA-E/GAPDH/VIM/B2M	7
GO:0001959	BP	GO:0001959	regulation of cytokine-mediated signaling pathway	7/125	183/18866	0.000219386	0.00875253	0.00709688	TAX1BP1/ADAR/JAK1/CXCR4/ELF1/HIF1A/PTPRC	7
GO:0046034	BP	GO:0046034	ATP metabolic process	9/125	311/18866	0.000229957	0.00903933	0.00732943	UQCR11/RHOA/COX7A2/HIF1A/PGK1/ALDOA/COX4I1/GAPDH/ND4	9
GO:0032535	BP	GO:0032535	regulation of cellular component size	10/125	383/18866	0.000236406	0.00915815	0.00742577	PPP1CA/ACTR3/ADD3/RHOA/CAPZB/HCLS1/RTN4/CORO1A/ACTR2/ARPC2	10
GO:0000245	BP	GO:0000245	spliceosomal complex assembly	5/125	85/18866	0.000253063	0.00966338	0.00783543	SRSF5/RBM5/SCAF11/CELF2/SF3B1	5
GO:0000380	BP	GO:0000380	alternative mRNA splicing	via spliceosome	5/125	87/18866	0.00028208	0.0103288	0.00837495	SRSF5/RBM5/CELF2/MBNL1/DDX17	5
GO:0048013	BP	GO:0048013	ephrin receptor signaling pathway	5/125	87/18866	0.00028208	0.0103288	0.00837495	ACTR3/RHOA/ACTR2/ARPC2/ACTB	5
GO:0097581	BP	GO:0097581	lamellipodium organization	5/125	87/18866	0.00028208	0.0103288	0.00837495	ACTR3/CAPZB/RAC2/ACTR2/ARPC2	5
GO:0045727	BP	GO:0045727	positive regulation of translation	6/125	136/18866	0.000292043	0.0105491	0.00855359	CIRBP/MAPK1/RHOA/CNBP/RPS9/VIM	6
GO:1901653	BP	GO:1901653	cellular response to peptide	10/125	398/18866	0.000320879	0.0113993	0.00924299	CCND3/SRSF5/PRKCB/OSBPL8/ATP6V1G1/STAT6/PRKAR1A/ATP6V0E1/CYBA/VIM	10
GO:0002433	BP	GO:0002433	immune response-regulating cell surface receptor signaling pathway involved in phagocytosis	6/125	139/18866	0.000328375	0.0113993	0.00924299	ACTR3/MAPK1/ACTR2/ARPC2/PTPRC/ACTB	6
GO:0038096	BP	GO:0038096	Fc-gamma receptor signaling pathway involved in phagocytosis	6/125	139/18866	0.000328375	0.0113993	0.00924299	ACTR3/MAPK1/ACTR2/ARPC2/PTPRC/ACTB	6
GO:0060759	BP	GO:0060759	regulation of response to cytokine stimulus	7/125	196/18866	0.000333055	0.0114135	0.00925452	TAX1BP1/ADAR/JAK1/CXCR4/ELF1/HIF1A/PTPRC	7
GO:0071375	BP	GO:0071375	cellular response to peptide hormone stimulus	9/125	330/18866	0.000355485	0.012028	0.00975276	CCND3/SRSF5/PRKCB/OSBPL8/ATP6V1G1/STAT6/PRKAR1A/ATP6V0E1/CYBA	9
GO:0038094	BP	GO:0038094	Fc-gamma receptor signaling pathway	6/125	142/18866	0.000368159	0.0123011	0.0099742	ACTR3/MAPK1/ACTR2/ARPC2/PTPRC/ACTB	6
GO:0048863	BP	GO:0048863	stem cell differentiation	8/125	264/18866	0.000379667	0.012529	0.010159	MAPK1/PSME1/PSMB1/PSMA7/PSMB4/ZFP36L2/HIF1A/PTPRC	8
GO:0010499	BP	GO:0010499	proteasomal ubiquitin-independent protein catabolic process	3/125	22/18866	0.00039881	0.0128632	0.01043	PSMB1/PSMA7/PSMB4	3
GO:0034341	BP	GO:0034341	response to interferon-gamma	7/125	202/18866	0.00039942	0.0128632	0.01043	ACTR3/JAK1/ACTR2/HLA-E/GAPDH/VIM/B2M	7
GO:0001738	BP	GO:0001738	morphogenesis of a polarized epithelium	6/125	145/18866	0.00041162	0.0129442	0.0104957	RHOA/PSME1/PSMB1/PSMA7/PSMB4/ACTB	6
GO:0002431	BP	GO:0002431	Fc receptor mediated stimulatory signaling pathway	6/125	145/18866	0.00041162	0.0129442	0.0104957	ACTR3/MAPK1/ACTR2/ARPC2/PTPRC/ACTB	6
GO:0045010	BP	GO:0045010	actin nucleation	4/125	53/18866	0.000418401	0.0130045	0.0105445	ACTR3/CORO1A/ACTR2/ARPC2	4
GO:0050852	BP	GO:0050852	T cell receptor signaling pathway	7/125	206/18866	0.000449257	0.013803	0.011192	MAPK1/ELF1/PSME1/PSMB1/PSMA7/PSMB4/PTPRC	7
GO:0006119	BP	GO:0006119	oxidative phosphorylation	6/125	149/18866	0.000475691	0.0144491	0.0117159	UQCR11/RHOA/COX7A2/PGK1/COX4I1/ND4	6
GO:0022604	BP	GO:0022604	regulation of cell morphogenesis	11/125	499/18866	0.000488622	0.0146751	0.0118991	CDC42SE2/CXCR4/RHOA/CAPZB/SH3KBP1/RAC2/RTN4/CORO1A/ALDOA/ACTR2/ARPC2	11
GO:0035567	BP	GO:0035567	non-canonical Wnt signaling pathway	6/125	151/18866	0.000510511	0.0151622	0.0122941	GNB1/RHOA/PSME1/PSMB1/PSMA7/PSMB4	6
GO:0070972	BP	GO:0070972	protein localization to endoplasmic reticulum	6/125	152/18866	0.000528648	0.0154273	0.0125091	RTN4/RPS29/RPS9/RPS27A/RPL31/RPS16	6
GO:0110053	BP	GO:0110053	regulation of actin filament organization	8/125	278/18866	0.000534511	0.0154273	0.0125091	ACTR3/ADD3/RHOA/CAPZB/HCLS1/CORO1A/ACTR2/ARPC2	8
GO:0061640	BP	GO:0061640	cytoskeleton-dependent cytokinesis	5/125	100/18866	0.000536754	0.0154273	0.0125091	ACTR3/RHOA/SON/JTB/ACTR2	5
GO:0030838	BP	GO:0030838	positive regulation of actin filament polymerization	5/125	101/18866	0.000561749	0.015974	0.0129523	ACTR3/RHOA/CORO1A/ACTR2/ARPC2	5
GO:0008360	BP	GO:0008360	regulation of cell shape	6/125	156/18866	0.00060627	0.0170585	0.0138317	CDC42SE2/RHOA/SH3KBP1/RAC2/CORO1A/ALDOA	6
GO:0033119	BP	GO:0033119	negative regulation of RNA splicing	3/125	26/18866	0.000660422	0.01829	0.0148302	TMBIM6/PTBP3/HNRNPA2B1	3
GO:1902600	BP	GO:1902600	proton transmembrane transport	6/125	159/18866	0.000670079	0.01829	0.0148302	ATP6V1G1/COX7A2/ATP6V0E1/SLC25A3/COX4I1/ND4	6
GO:0006614	BP	GO:0006614	SRP-dependent cotranslational protein targeting to membrane	5/125	105/18866	0.000670563	0.01829	0.0148302	RPS29/RPS9/RPS27A/RPL31/RPS16	5
GO:0031343	BP	GO:0031343	positive regulation of cell killing	4/125	61/18866	0.000715856	0.0191884	0.0155586	HLA-E/GAPDH/PTPRC/B2M	4
GO:0043467	BP	GO:0043467	regulation of generation of precursor metabolites and energy	6/125	162/18866	0.000738975	0.0191884	0.0155586	PPP1CA/RHOA/COX7A2/HIF1A/PRELID1/PGK1	6
GO:0006735	BP	GO:0006735	NADH regeneration	3/125	27/18866	0.000739395	0.0191884	0.0155586	PGK1/ALDOA/GAPDH	3
GO:0061621	BP	GO:0061621	canonical glycolysis	3/125	27/18866	0.000739395	0.0191884	0.0155586	PGK1/ALDOA/GAPDH	3
GO:0061718	BP	GO:0061718	glucose catabolic process to pyruvate	3/125	27/18866	0.000739395	0.0191884	0.0155586	PGK1/ALDOA/GAPDH	3
GO:0060071	BP	GO:0060071	Wnt signaling pathway	planar cell polarity pathway	5/125	108/18866	0.000761992	0.0195846	0.01588	RHOA/PSME1/PSMB1/PSMA7/PSMB4	5
GO:0006613	BP	GO:0006613	cotranslational protein targeting to membrane	5/125	109/18866	0.000794443	0.0201183	0.0163127	RPS29/RPS9/RPS27A/RPL31/RPS16	5
GO:0071356	BP	GO:0071356	cellular response to tumor necrosis factor	8/125	297/18866	0.000822793	0.0201183	0.0163127	TAX1BP1/MAPK1/PSME1/PSMB1/PSMA7/PSMB4/ZFP36L2/CYBA	8
GO:0001916	BP	GO:0001916	positive regulation of T cell mediated cytotoxicity	3/125	28/18866	0.000824133	0.0201183	0.0163127	HLA-E/PTPRC/B2M	3
GO:0033598	BP	GO:0033598	mammary gland epithelial cell proliferation	3/125	28/18866	0.000824133	0.0201183	0.0163127	MAPK1/STAT6/RTN4	3
GO:0061620	BP	GO:0061620	glycolytic process through glucose-6-phosphate	3/125	28/18866	0.000824133	0.0201183	0.0163127	PGK1/ALDOA/GAPDH	3
GO:0090175	BP	GO:0090175	regulation of establishment of planar polarity	5/125	110/18866	0.000827914	0.0201183	0.0163127	RHOA/PSME1/PSMB1/PSMA7/PSMB4	5
GO:0034250	BP	GO:0034250	positive regulation of cellular amide metabolic process	6/125	167/18866	0.000865846	0.0208505	0.0169064	CIRBP/MAPK1/RHOA/CNBP/RPS9/VIM	6
GO:0051258	BP	GO:0051258	protein polymerization	8/125	300/18866	0.000877993	0.0209542	0.0169905	ACTR3/ADD3/RHOA/CAPZB/HCLS1/CORO1A/ACTR2/ARPC2	8
GO:0061615	BP	GO:0061615	glycolytic process through fructose-6-phosphate	3/125	29/18866	0.000914798	0.0216394	0.0175461	PGK1/ALDOA/GAPDH	3
GO:0002244	BP	GO:0002244	hematopoietic progenitor cell differentiation	6/125	172/18866	0.0010089	0.023656	0.0191812	ADAR/PSME1/PSMB1/PSMA7/PSMB4/PTPRC	6
GO:0002637	BP	GO:0002637	regulation of immunoglobulin production	4/125	68/18866	0.00107803	0.0250573	0.0203174	STAT6/TMBIM6/HLA-E/PTPRC	4
GO:2000736	BP	GO:2000736	regulation of stem cell differentiation	5/125	118/18866	0.00113488	0.0259901	0.0210738	PSME1/PSMB1/PSMA7/PSMB4/ZFP36L2	5
GO:0060249	BP	GO:0060249	anatomical structure homeostasis	10/125	469/18866	0.00113761	0.0259901	0.0210738	MAPK1/RAC2/HIF1A/HNRNPA2B1/HNRNPC/CORO1A/ALDOA/GNAS/ACTB/B2M	10
GO:0000184	BP	GO:0000184	nuclear-transcribed mRNA catabolic process	nonsense-mediated decay	5/125	120/18866	0.00122326	0.0272628	0.0221057	RPS29/RPS9/RPS27A/RPL31/RPS16	5
GO:0045047	BP	GO:0045047	protein targeting to ER	5/125	120/18866	0.00122326	0.0272628	0.0221057	RPS29/RPS9/RPS27A/RPL31/RPS16	5
GO:0002082	BP	GO:0002082	regulation of oxidative phosphorylation	3/125	32/18866	0.00122392	0.0272628	0.0221057	RHOA/COX7A2/PGK1	3
GO:0061180	BP	GO:0061180	mammary gland epithelium development	4/125	71/18866	0.00126672	0.0278104	0.0225497	MAPK1/STAT6/HIF1A/RTN4	4
GO:0030218	BP	GO:0030218	erythrocyte differentiation	5/125	121/18866	0.00126931	0.0278104	0.0225497	ADAR/PTBP3/HIF1A/HCLS1/B2M	5
GO:0034612	BP	GO:0034612	response to tumor necrosis factor	8/125	320/18866	0.00132666	0.0288306	0.023377	TAX1BP1/MAPK1/PSME1/PSMB1/PSMA7/PSMB4/ZFP36L2/CYBA	8
GO:2001235	BP	GO:2001235	positive regulation of apoptotic signaling pathway	6/125	183/18866	0.00138725	0.0291044	0.0235989	BCLAF1/PPP1CA/STK4/YWHAB/MCL1/PTPRC	6
GO:0022613	BP	GO:0022613	ribonucleoprotein complex biogenesis	10/125	482/18866	0.0013952	0.0291044	0.0235989	SRSF5/RBM5/SCAF11/ADAR/TRMT112/CELF2/SF3B1/DDX17/RPS9/RPS16	10
GO:1902036	BP	GO:1902036	regulation of hematopoietic stem cell differentiation	4/125	73/18866	0.00140464	0.0291044	0.0235989	PSME1/PSMB1/PSMA7/PSMB4	4
GO:0001736	BP	GO:0001736	establishment of planar polarity	5/125	124/18866	0.00141518	0.0291044	0.0235989	RHOA/PSME1/PSMB1/PSMA7/PSMB4	5
GO:0007164	BP	GO:0007164	establishment of tissue polarity	5/125	124/18866	0.00141518	0.0291044	0.0235989	RHOA/PSME1/PSMB1/PSMA7/PSMB4	5
GO:0072599	BP	GO:0072599	establishment of protein localization to endoplasmic reticulum	5/125	124/18866	0.00141518	0.0291044	0.0235989	RPS29/RPS9/RPS27A/RPL31/RPS16	5
GO:0038061	BP	GO:0038061	NIK/NF-kappaB signaling	6/125	184/18866	0.00142636	0.0291044	0.0235989	LITAF/RHOA/PSME1/PSMB1/PSMA7/PSMB4	6
GO:0090090	BP	GO:0090090	negative regulation of canonical Wnt signaling pathway	6/125	184/18866	0.00142636	0.0291044	0.0235989	STK4/PSME1/PSMB1/PSMA7/PSMB4/PFDN5	6
GO:0050851	BP	GO:0050851	antigen receptor-mediated signaling pathway	8/125	325/18866	0.00146334	0.0294721	0.0238971	PRKCB/MAPK1/ELF1/PSME1/PSMB1/PSMA7/PSMB4/PTPRC	8
GO:0032479	BP	GO:0032479	regulation of type I interferon production	5/125	125/18866	0.00146644	0.0294721	0.0238971	YY1/TAX1BP1/STAT6/LRRFIP1/PCBP2	5
GO:0032606	BP	GO:0032606	type I interferon production	5/125	127/18866	0.00157305	0.0313787	0.0254431	YY1/TAX1BP1/STAT6/LRRFIP1/PCBP2	5
GO:0001914	BP	GO:0001914	regulation of T cell mediated cytotoxicity	3/125	35/18866	0.00159184	0.0315185	0.0255564	HLA-E/PTPRC/B2M	3
GO:0002831	BP	GO:0002831	regulation of response to biotic stimulus	9/125	409/18866	0.00162142	0.0318026	0.0257868	ADAR/JAK1/PSME1/PSMB1/PSMA7/PSMB4/CYBA/PCBP2/HLA-E	9
GO:0010565	BP	GO:0010565	regulation of cellular ketone metabolic process	6/125	189/18866	0.00163472	0.0318026	0.0257868	ELOVL5/PSME1/PSMB1/PSMA7/PSMB4/OAZ1	6
GO:0032147	BP	GO:0032147	activation of protein kinase activity	8/125	331/18866	0.00164189	0.0318026	0.0257868	CXCR4/MAPK1/OSBPL8/STK4/PRKAR1A/PTPRC/UBC/RPS27A	8
GO:0034101	BP	GO:0034101	erythrocyte homeostasis	5/125	129/18866	0.00168525	0.0324077	0.0262774	ADAR/PTBP3/HIF1A/HCLS1/B2M	5
GO:0006007	BP	GO:0006007	glucose catabolic process	3/125	36/18866	0.00172821	0.0328497	0.0266357	PGK1/ALDOA/GAPDH	3
GO:2001233	BP	GO:2001233	regulation of apoptotic signaling pathway	9/125	413/18866	0.00173281	0.0328497	0.0266357	BCLAF1/PPP1CA/STK4/TMBIM6/HIF1A/YWHAB/MCL1/PRELID1/PTPRC	9
GO:0044106	BP	GO:0044106	cellular amine metabolic process	5/125	131/18866	0.00180322	0.0339438	0.0275229	PSME1/PSMB1/PSMA7/PSMB4/OAZ1	5
GO:0033120	BP	GO:0033120	positive regulation of RNA splicing	3/125	37/18866	0.00187166	0.0345765	0.0280359	SRSF5/CIRBP/SLC38A2	3
GO:0006446	BP	GO:0006446	regulation of translational initiation	4/125	79/18866	0.00188081	0.0345765	0.0280359	PPP1CA/PAIP2/EIF1/EIF4G2	4
GO:0006826	BP	GO:0006826	iron ion transport	4/125	79/18866	0.00188081	0.0345765	0.0280359	ATP6V1G1/ATP6V0E1/FTL/B2M	4
GO:0033157	BP	GO:0033157	regulation of intracellular protein transport	7/125	264/18866	0.00190523	0.0345765	0.0280359	MAPK1/SNX3/RAC2/HCLS1/YWHAB/LCP1/OAZ1	7
GO:0019080	BP	GO:0019080	viral gene expression	6/125	195/18866	0.00191445	0.0345765	0.0280359	PCBP2/RPS29/RPS9/RPS27A/RPL31/RPS16	6
GO:0042098	BP	GO:0042098	T cell proliferation	6/125	195/18866	0.00191445	0.0345765	0.0280359	CCND3/PRKAR1A/RAC2/CORO1A/HLA-E/PTPRC	6
GO:0032273	BP	GO:0032273	positive regulation of protein polymerization	5/125	137/18866	0.00219353	0.0393194	0.0318816	ACTR3/RHOA/CORO1A/ACTR2/ARPC2	5
GO:0045785	BP	GO:0045785	positive regulation of cell adhesion	9/125	428/18866	0.00220647	0.0393194	0.0318816	APBB1IP/JAK1/RHOA/STK4/IQGAP1/CORO1A/HLA-E/ARPC2/PTPRC	9
GO:0007191	BP	GO:0007191	adenylate cyclase-activating dopamine receptor signaling pathway	2/125	11/18866	0.00230338	0.0404538	0.0328015	GNB1/GNAS	2
GO:0071803	BP	GO:0071803	positive regulation of podosome assembly	2/125	11/18866	0.00230338	0.0404538	0.0328015	RHOA/LCP1	2
GO:0002714	BP	GO:0002714	positive regulation of B cell mediated immunity	3/125	40/18866	0.00234581	0.0404538	0.0328015	STAT6/HLA-E/PTPRC	3
GO:0002891	BP	GO:0002891	positive regulation of immunoglobulin mediated immune response	3/125	40/18866	0.00234581	0.0404538	0.0328015	STAT6/HLA-E/PTPRC	3
GO:0034314	BP	GO:0034314	Arp2/3 complex-mediated actin nucleation	3/125	40/18866	0.00234581	0.0404538	0.0328015	ACTR3/ACTR2/ARPC2	3
GO:0009308	BP	GO:0009308	amine metabolic process	5/125	140/18866	0.00241024	0.0412985	0.0334864	PSME1/PSMB1/PSMA7/PSMB4/OAZ1	5
GO:0051222	BP	GO:0051222	positive regulation of protein transport	8/125	354/18866	0.00249226	0.0424319	0.0344053	MAPK1/RAC2/HIF1A/HCLS1/YWHAB/HLA-E/GAPDH/OAZ1	8
GO:0006734	BP	GO:0006734	NADH metabolic process	3/125	41/18866	0.00251886	0.0426133	0.0345525	PGK1/ALDOA/GAPDH	3
GO:0015980	BP	GO:0015980	energy derivation by oxidation of organic compounds	7/125	278/18866	0.00254628	0.0428063	0.034709	PPP1CA/UQCR11/HIF1A/PRELID1/COX4I1/GNAS/ND4	7
GO:1901532	BP	GO:1901532	regulation of hematopoietic progenitor cell differentiation	4/125	86/18866	0.00256551	0.0428601	0.0347526	PSME1/PSMB1/PSMA7/PSMB4	4
GO:0008286	BP	GO:0008286	insulin receptor signaling pathway	5/125	143/18866	0.00264212	0.0438657	0.035568	CCND3/PRKCB/OSBPL8/ATP6V1G1/ATP6V0E1	5
GO:0055072	BP	GO:0055072	iron ion homeostasis	4/125	87/18866	0.00267556	0.0438759	0.0355762	ATP6V1G1/HIF1A/FTL/B2M	4
GO:0060218	BP	GO:0060218	hematopoietic stem cell differentiation	4/125	87/18866	0.00267556	0.0438759	0.0355762	PSME1/PSMB1/PSMA7/PSMB4	4
GO:0098927	BP	GO:0098927	vesicle-mediated transport between endosomal compartments	3/125	42/18866	0.0026996	0.0440002	0.035677	MAPK1/SNX3/CORO1A	3
GO:0002700	BP	GO:0002700	regulation of production of molecular mediator of immune response	5/125	144/18866	0.00272289	0.0441108	0.0357667	STAT6/TMBIM6/HLA-E/PTPRC/B2M	5
GO:0000956	BP	GO:0000956	nuclear-transcribed mRNA catabolic process	6/125	210/18866	0.00277217	0.0446375	0.0361937	ZFP36L2/RPS29/RPS9/RPS27A/RPL31/RPS16	6
GO:1903312	BP	GO:1903312	negative regulation of mRNA metabolic process	4/125	88/18866	0.0027888	0.0446375	0.0361937	CIRBP/PTBP3/HNRNPA2B1/HNRNPC	4
GO:0006605	BP	GO:0006605	protein targeting	9/125	444/18866	0.00282019	0.0448713	0.0363833	RAC2/YWHAB/GABARAP/RPS29/RPS9/UBC/RPS27A/RPL31/RPS16	9
GO:0043687	BP	GO:0043687	post-translational protein modification	8/125	363/18866	0.00290634	0.0459683	0.0372728	PSME1/PSMB1/PSMA7/PSMB4/WSB1/HIF1A/TGOLN2/PTP4A2	8
GO:0043254	BP	GO:0043254	regulation of protein-containing complex assembly	9/125	449/18866	0.00303747	0.0477597	0.0387254	ACTR3/ADD3/RHOA/CAPZB/HCLS1/LCP1/CORO1A/ACTR2/ARPC2	9
GO:0001913	BP	GO:0001913	T cell mediated cytotoxicity	3/125	44/18866	0.00308462	0.0482176	0.0390966	HLA-E/PTPRC/B2M	3
GO:0003084	BP	GO:0003084	positive regulation of systemic arterial blood pressure	2/125	13/18866	0.0032384	0.0496712	0.0402753	RHOA/CYBA	2
GO:1904951	BP	GO:1904951	positive regulation of establishment of protein localization	8/125	370/18866	0.00326409	0.0496712	0.0402753	MAPK1/RAC2/HIF1A/HCLS1/YWHAB/HLA-E/GAPDH/OAZ1	8
GO:0031341	BP	GO:0031341	regulation of cell killing	4/125	92/18866	0.00327463	0.0496712	0.0402753	HLA-E/GAPDH/PTPRC/B2M	4
GO:0002639	BP	GO:0002639	positive regulation of immunoglobulin production	3/125	45/18866	0.00328911	0.0496712	0.0402753	STAT6/HLA-E/PTPRC	3
GO:0035094	BP	GO:0035094	response to nicotine	3/125	45/18866	0.00328911	0.0496712	0.0402753	MAPK1/ND4/B2M	3
GO:0045911	BP	GO:0045911	positive regulation of DNA recombination	3/125	45/18866	0.00328911	0.0496712	0.0402753	STAT6/ACTR2/PTPRC	3
GO:0005925	CC	GO:0005925	focal adhesion	23/130	415/19559	4.53609e-15	1.03381e-12	8.04491e-13	ACTR3/APBB1IP/JAK1/MAPK1/RHOA/SH3KBP1/IQGAP1/RAC2/YWHAB/GDI2/LCP1/CYBA/PCBP2/ACTR2/RPS29/ARPC2/RPS9/PTPRC/ACTB/VIM/RPL31/RPS16/B2M	23
GO:0030055	CC	GO:0030055	cell-substrate junction	23/130	423/19559	6.82381e-15	1.03381e-12	8.04491e-13	ACTR3/APBB1IP/JAK1/MAPK1/RHOA/SH3KBP1/IQGAP1/RAC2/YWHAB/GDI2/LCP1/CYBA/PCBP2/ACTR2/RPS29/ARPC2/RPS9/PTPRC/ACTB/VIM/RPL31/RPS16/B2M	23
GO:0045335	CC	GO:0045335	phagocytic vesicle	8/130	140/19559	4.39298e-06	0.000358774	0.000279192	SNX3/ATP6V0E1/RAC2/CYBA/CORO1A/HLA-E/VIM/B2M	8
GO:0031252	CC	GO:0031252	cell leading edge	13/130	421/19559	4.7363e-06	0.000358774	0.000279192	ACTR3/APBB1IP/CXCR4/RHOA/IQGAP1/RAC2/LCP1/CORO1A/ACTR2/ARPC2/S100A6/ACTB/VIM	13
GO:0030139	CC	GO:0030139	endocytic vesicle	11/130	313/19559	7.92747e-06	0.000480404	0.000373843	SNX3/SH3KBP1/ATP6V0E1/RAC2/CYBA/CORO1A/HLA-E/VIM/UBC/RPS27A/B2M	11
GO:0030670	CC	GO:0030670	phagocytic vesicle membrane	6/130	77/19559	1.23697e-05	0.000608483	0.000473511	ATP6V0E1/RAC2/CYBA/CORO1A/HLA-E/B2M	6
GO:0030666	CC	GO:0030666	endocytic vesicle membrane	8/130	164/19559	1.40574e-05	0.000608483	0.000473511	ATP6V0E1/RAC2/CYBA/CORO1A/HLA-E/UBC/RPS27A/B2M	8
GO:0098562	CC	GO:0098562	cytoplasmic side of membrane	8/130	188/19559	3.75389e-05	0.00142179	0.00110641	LITAF/GNB1/RHOA/IQGAP1/GNAS/RPS29/PTPRC/S100A6	8
GO:0005885	CC	GO:0005885	Arp2/3 protein complex	3/130	11/19559	4.5531e-05	0.00153288	0.00119286	ACTR3/ACTR2/ARPC2	3
GO:0030027	CC	GO:0030027	lamellipodium	8/130	201/19559	6.02367e-05	0.00182517	0.00142032	ACTR3/APBB1IP/RHOA/RAC2/CORO1A/ACTR2/ARPC2/ACTB	8
GO:0016607	CC	GO:0016607	nuclear speck	11/130	401/19559	7.68919e-05	0.00211802	0.00164821	BRD2/SRSF5/BCLAF1/CCNL1/PNISR/WAC/SON/DAZAP2/SF3B1/HIF1A/DDX17	11
GO:0009898	CC	GO:0009898	cytoplasmic side of plasma membrane	7/130	164/19559	0.000114144	0.00288214	0.00224283	LITAF/GNB1/RHOA/IQGAP1/GNAS/PTPRC/S100A6	7
GO:0005884	CC	GO:0005884	actin filament	6/130	118/19559	0.000137699	0.00320944	0.00249753	IQGAP1/RAC2/HCLS1/LCP1/CORO1A/ACTB	6
GO:0022627	CC	GO:0022627	cytosolic small ribosomal subunit	4/130	47/19559	0.00026635	0.00570207	0.00443725	RPS29/RPS9/RPS27A/RPS16	4
GO:0005681	CC	GO:0005681	spliceosomal complex	7/130	192/19559	0.000300913	0.00570207	0.00443725	RBM5/CIRBP/ADAR/WAC/SF3B1/HNRNPA2B1/HNRNPC	7
GO:0005839	CC	GO:0005839	proteasome core complex	3/130	20/19559	0.000301099	0.00570207	0.00443725	PSMB1/PSMA7/PSMB4	3
GO:0031234	CC	GO:0031234	extrinsic component of cytoplasmic side of plasma membrane	5/130	99/19559	0.00052116	0.00928891	0.00722848	GNB1/RHOA/IQGAP1/GNAS/S100A6	5
GO:0030863	CC	GO:0030863	cortical cytoskeleton	5/130	106/19559	0.000711638	0.0115899	0.00901909	PRKCB/HCLS1/CORO1A/ACTR2/ACTB	5
GO:0001891	CC	GO:0001891	phagocytic cup	3/130	27/19559	0.000746748	0.0115899	0.00901909	CDC42SE2/LCP1/CORO1A	3
GO:0070820	CC	GO:0070820	tertiary granule	6/130	164/19559	0.000803309	0.0115899	0.00901909	YPEL5/RHOA/CYBA/CD53/ALDOA/B2M	6
GO:0000502	CC	GO:0000502	proteasome complex	4/130	63/19559	0.000819524	0.0115899	0.00901909	PSME1/PSMB1/PSMA7/PSMB4	4
GO:0022626	CC	GO:0022626	cytosolic ribosome	5/130	110/19559	0.000841513	0.0115899	0.00901909	RPS29/RPS9/RPS27A/RPL31/RPS16	5
GO:0005938	CC	GO:0005938	cell cortex	8/130	305/19559	0.00100145	0.013193	0.0102665	PRKCB/ADD3/RHOA/RAC2/HCLS1/CORO1A/ACTR2/ACTB	8
GO:1905369	CC	GO:1905369	endopeptidase complex	4/130	69/19559	0.00115348	0.0145627	0.0113324	PSME1/PSMB1/PSMA7/PSMB4	4
GO:0034774	CC	GO:0034774	secretory granule lumen	8/130	322/19559	0.00141452	0.0159761	0.0124323	ARHGAP9/MAPK1/PSMB1/GDI2/ALDOA/ACTR2/FTL/B2M	8
GO:0101002	CC	GO:0101002	ficolin-1-rich granule	5/130	124/19559	0.00143795	0.0159761	0.0124323	YPEL5/MAPK1/PSMB1/ALDOA/ACTR2	5
GO:1904813	CC	GO:1904813	ficolin-1-rich granule lumen	5/130	124/19559	0.00143795	0.0159761	0.0124323	YPEL5/MAPK1/PSMB1/ALDOA/ACTR2	5
GO:0015935	CC	GO:0015935	small ribosomal subunit	4/130	74/19559	0.00149656	0.0159761	0.0124323	RPS29/RPS9/RPS27A/RPS16	4
GO:0060205	CC	GO:0060205	cytoplasmic vesicle lumen	8/130	326/19559	0.00152906	0.0159761	0.0124323	ARHGAP9/MAPK1/PSMB1/GDI2/ALDOA/ACTR2/FTL/B2M	8
GO:0031983	CC	GO:0031983	vesicle lumen	8/130	328/19559	0.00158903	0.0160492	0.0124892	ARHGAP9/MAPK1/PSMB1/GDI2/ALDOA/ACTR2/FTL/B2M	8
GO:0005911	CC	GO:0005911	cell-cell junction	10/130	493/19559	0.00169864	0.0166029	0.0129201	PPP1CA/ACTR3/ADD3/RHOA/SH3KBP1/IQGAP1/EIF4G2/CORO1A/CD53/ACTB	10
GO:0030864	CC	GO:0030864	cortical actin cytoskeleton	4/130	80/19559	0.0019951	0.0188911	0.0147007	PRKCB/HCLS1/CORO1A/ACTR2	4
GO:0001772	CC	GO:0001772	immunological synapse	3/130	39/19559	0.00220151	0.0202139	0.0157301	PRKAR1A/CORO1A/CD53	3
GO:0019774	CC	GO:0019774	proteasome core complex	beta-subunit complex	2/130	11/19559	0.00231829	0.0206601	0.0160773	PSMB1/PSMB4	2
GO:0035578	CC	GO:0035578	azurophil granule lumen	4/130	91/19559	0.00318787	0.0275978	0.0214761	MAPK1/GDI2/ACTR2/FTL	4
GO:1905368	CC	GO:1905368	peptidase complex	4/130	92/19559	0.00331587	0.0279085	0.021718	PSME1/PSMB1/PSMA7/PSMB4	4
GO:0005769	CC	GO:0005769	early endosome	8/130	377/19559	0.00374087	0.0306347	0.0238394	LITAF/CXCR4/MAPK1/SNX3/CORO1A/PTP4A2/HLA-E/B2M	8
GO:0030176	CC	GO:0030176	integral component of endoplasmic reticulum membrane	5/130	158/19559	0.00411217	0.0327892	0.025516	ELOVL5/SARAF/RTN4/HLA-E/B2M	5
GO:0070469	CC	GO:0070469	respirasome	4/130	101/19559	0.00462877	0.035962	0.027985	UQCR11/COX7A2/COX4I1/ND4	4
GO:0031227	CC	GO:0031227	intrinsic component of endoplasmic reticulum membrane	5/130	166/19559	0.00506388	0.0383589	0.0298502	ELOVL5/SARAF/RTN4/HLA-E/B2M	5
GO:1904724	CC	GO:1904724	tertiary granule lumen	3/130	55/19559	0.00585075	0.0423718	0.032973	YPEL5/ALDOA/B2M	3
GO:0019897	CC	GO:0019897	extrinsic component of plasma membrane	5/130	172/19559	0.00587332	0.0423718	0.032973	GNB1/RHOA/IQGAP1/GNAS/S100A6	5
GO:0016363	CC	GO:0016363	nuclear matrix	4/130	109/19559	0.0060563	0.0426758	0.0332096	STAG2/YY1/HNRNPA2B1/VIM	4
GO:0045121	CC	GO:0045121	membrane raft	7/130	329/19559	0.00648891	0.044398	0.0345498	ADD3/MAPK1/STAT6/PRKAR1A/IQGAP1/PGK1/PTPRC	7
GO:0098857	CC	GO:0098857	membrane microdomain	7/130	330/19559	0.00659376	0.044398	0.0345498	ADD3/MAPK1/STAT6/PRKAR1A/IQGAP1/PGK1/PTPRC	7
GO:0051015	MF	GO:0051015	actin filament binding	9/128	206/18352	1.43028e-05	0.0050203	0.00451669	ACTR3/ADD3/CAPZB/IQGAP1/HCLS1/LCP1/CORO1A/ACTR2/ARPC2	9
GO:0031625	MF	GO:0031625	ubiquitin protein ligase binding	10/128	297/18352	4.4703e-05	0.00547305	0.00492402	JAK1/CXCR4/PRKAR1A/TMBIM6/HIF1A/RTN4/GABARAP/PCBP2/UBC/RPS27A	10
GO:0019887	MF	GO:0019887	protein kinase regulator activity	8/128	185/18352	4.67782e-05	0.00547305	0.00492402	CCND3/CCNL1/STK4/PRKAR1A/IQGAP1/DAZAP2/RAC2/CCNI	8
GO:0044389	MF	GO:0044389	ubiquitin-like protein ligase binding	10/128	316/18352	7.50561e-05	0.0062363	0.00561071	JAK1/CXCR4/PRKAR1A/TMBIM6/HIF1A/RTN4/GABARAP/PCBP2/UBC/RPS27A	10
GO:0005200	MF	GO:0005200	structural constituent of cytoskeleton	6/128	104/18352	8.88362e-05	0.0062363	0.00561071	ACTR3/ADD3/ACTR2/ARPC2/ACTB/VIM	6
GO:0045296	MF	GO:0045296	cadherin binding	10/128	332/18352	0.000112792	0.00659832	0.00593641	PPP1CA/ARGLU1/STK24/CAPZB/LRRFIP1/IQGAP1/YWHAB/RTN4/EIF4G2/ALDOA	10
GO:0019207	MF	GO:0019207	kinase regulator activity	8/128	216/18352	0.000138025	0.00692096	0.00622669	CCND3/CCNL1/STK4/PRKAR1A/IQGAP1/DAZAP2/RAC2/CCNI	8
GO:0003779	MF	GO:0003779	actin binding	11/128	437/18352	0.000246305	0.0108066	0.00972257	ACTR3/CXCR4/ADD3/CAPZB/IQGAP1/HCLS1/LCP1/CORO1A/ALDOA/ACTR2/ARPC2	11
GO:0004298	MF	GO:0004298	threonine-type endopeptidase activity	3/128	21/18352	0.000402084	0.0151351	0.0136168	PSMB1/PSMA7/PSMB4	3
GO:0045182	MF	GO:0045182	translation regulator activity	6/128	139/18352	0.000431199	0.0151351	0.0136168	CIRBP/PAIP2/EIF1/CNBP/EIF4G2/RPS9	6
GO:0030507	MF	GO:0030507	spectrin binding	3/128	28/18352	0.000955731	0.0304965	0.0274373	GNB1/ADD3/PTPRC	3
GO:0070003	MF	GO:0070003	threonine-type peptidase activity	3/128	31/18352	0.00129152	0.0377769	0.0339873	PSMB1/PSMA7/PSMB4	3
GO:0051427	MF	GO:0051427	hormone receptor binding	6/128	177/18352	0.00151915	0.0410171	0.0369025	TAF10/JAK1/PRKCB/JUND/HIF1A/GNAS	6
GO:0003725	MF	GO:0003725	double-stranded RNA binding	4/128	76/18352	0.0019658	0.0460632	0.0414424	ADAR/LRRFIP1/MBNL1/VIM	4
GO:0015078	MF	GO:0015078	proton transmembrane transporter activity	5/128	127/18352	0.00196851	0.0460632	0.0414424	ATP6V1G1/COX7A2/ATP6V0E1/SLC25A3/COX4I1	5
GO:0043539	MF	GO:0043539	protein serine/threonine kinase activator activity	3/128	38/18352	0.00233929	0.0497935	0.0447985	STK4/IQGAP1/DAZAP2	3
GO:0019902	MF	GO:0019902	phosphatase binding	6/128	194/18352	0.00241165	0.0497935	0.0447985	PPP1CA/JAK1/MAPK1/SNX3/STAT6/IQGAP1	6
