# Supplementary material for: Identification of prognosis value and immune microenvironment features of ceRNAs in NSCLC with distinct gene mutation
Source: Aging (Albany NY). 2023 Jun 26;15(12):5873–86. doi: 10.18632/aging.204846 (PMC10333077; doi:10.18632/aging.204846)
Supplement: Supplementary Table 4 [file aging-15-204846-s004.xlsx]

## Sheet: LUAD
ID	Stromal_score	Immune_score	ESTIMATE_score
TCGA-05-4244-01	-470.99	933.74	462.76
TCGA-05-4249-01	-0.14	1033.35	1033.21
TCGA-05-4250-01	263.1	1184.84	1447.95
TCGA-05-4382-01	1205.42	1641.81	2847.24
TCGA-05-4384-01	-75.43	767.77	692.34
TCGA-05-4389-01	-397.74	1456.58	1058.84
TCGA-05-4390-01	124.48	76.91	201.39
TCGA-05-4395-01	-620.75	854.14	233.39
TCGA-05-4396-01	-714.18	-204.96	-919.14
TCGA-05-4397-01	-688.16	463.66	-224.49
TCGA-05-4398-01	362.65	1514.83	1877.48
TCGA-05-4402-01	208.5	848.38	1056.88
TCGA-05-4403-01	92.1	1327.2	1419.3
TCGA-05-4405-01	873.93	845.61	1719.54
TCGA-05-4410-01	-103.47	1449.18	1345.71
TCGA-05-4415-01	-1124.07	52.89	-1071.18
TCGA-05-4417-01	1292.02	1580.98	2873
TCGA-05-4418-01	-111.7	1233.33	1121.62
TCGA-05-4420-01	-421.95	-179.48	-601.43
TCGA-05-4422-01	-693	1425.83	732.83
TCGA-05-4424-01	509.42	1169.53	1678.95
TCGA-05-4425-01	440.03	1600.66	2040.69
TCGA-05-4426-01	-590.25	695.94	105.7
TCGA-05-4427-01	77.18	823.37	900.55
TCGA-05-4430-01	1057.05	1304.67	2361.71
TCGA-05-4432-01	-140.24	822.09	681.85
TCGA-05-4433-01	-305.36	1499.08	1193.72
TCGA-05-4434-01	617.81	1881.89	2499.7
TCGA-05-5420-01	644.13	2704.93	3349.06
TCGA-05-5423-01	90.11	1820.79	1910.9
TCGA-05-5425-01	165.33	1753.64	1918.97
TCGA-05-5428-01	93.84	831.02	924.87
TCGA-05-5429-01	-495.96	-66.98	-562.94
TCGA-05-5715-01	457.88	944.86	1402.74
TCGA-35-3615-01	-422.99	405.82	-17.17
TCGA-35-4122-01	744.23	2295.05	3039.28
TCGA-35-4123-01	622.04	2138.23	2760.27
TCGA-35-5375-01	-225.2	1039.07	813.87
TCGA-38-4625-01	-138.22	964.93	826.71
TCGA-38-4626-01	1082.46	1926.47	3008.93
TCGA-38-4627-01	2098.77	1512.22	3610.98
TCGA-38-4628-01	336.32	720.64	1056.96
TCGA-38-4629-01	918.97	1883.89	2802.86
TCGA-38-4630-01	-412.46	-361.37	-773.82
TCGA-38-4631-01	-828.13	254.82	-573.31
TCGA-38-4632-01	60.86	1531.5	1592.36
TCGA-38-6178-01	305.45	409.24	714.69
TCGA-38-7271-01	1191.36	2743.79	3935.15
TCGA-38-A44F-01	426.69	1875.62	2302.31
TCGA-44-2655-01	-437.38	861.14	423.77
TCGA-44-2656-01	731.06	2175.91	2906.97
TCGA-44-2657-01	679.86	2387.9	3067.76
TCGA-44-2659-01	641.16	1273.63	1914.79
TCGA-44-2661-01	1019.75	2577.1	3596.85
TCGA-44-2662-01	819.69	1702.24	2521.93
TCGA-44-2665-01	1496.26	1324.81	2821.06
TCGA-44-2666-01	-715.25	135.45	-579.79
TCGA-44-2668-01	959.18	1861.47	2820.64
TCGA-44-3396-01	1133.45	1885.83	3019.28
TCGA-44-3398-01	1230.85	1896.59	3127.44
TCGA-44-3918-01	1092.2	2304	3396.2
TCGA-44-3919-01	452.54	1640.92	2093.46
TCGA-44-4112-01	543.91	626.49	1170.4
TCGA-44-5643-01	-1181.08	412.41	-768.67
TCGA-44-5644-01	-1149.84	-640.82	-1790.66
TCGA-44-5645-01	204.95	1680.22	1885.17
TCGA-44-6145-01	686.36	1890.66	2577.02
TCGA-44-6146-01	-944.86	-208.62	-1153.48
TCGA-44-6147-01	552.01	1026.48	1578.49
TCGA-44-6148-01	452.62	689.74	1142.35
TCGA-44-6774-01	1888.92	1020.11	2909.03
TCGA-44-6775-01	1357.55	1481.59	2839.15
TCGA-44-6776-01	-897.75	-274.42	-1172.17
TCGA-44-6777-01	1986.65	2264.99	4251.64
TCGA-44-6778-01	643.57	2425.86	3069.43
TCGA-44-6779-01	612.95	1886.98	2499.92
TCGA-44-7659-01	-593.67	614.81	21.15
TCGA-44-7660-01	-805.51	255.7	-549.8
TCGA-44-7661-01	858.57	1668.3	2526.87
TCGA-44-7662-01	1127.28	1013.44	2140.72
TCGA-44-7667-01	-642.18	-314.04	-956.22
TCGA-44-7669-01	-163.71	737.61	573.9
TCGA-44-7670-01	-1226.8	-288.38	-1515.17
TCGA-44-7671-01	39.83	-185.72	-145.89
TCGA-44-7672-01	1021.73	2095.52	3117.25
TCGA-44-8117-01	145.48	286.52	432
TCGA-44-8119-01	941.34	726.62	1667.96
TCGA-44-8120-01	371.86	557.79	929.65
TCGA-44-A479-01	945.27	2044.8	2990.07
TCGA-44-A47A-01	-232.64	1396.49	1163.85
TCGA-44-A47B-01	-220.14	800.34	580.2
TCGA-44-A47G-01	848.83	2129.05	2977.88
TCGA-44-A4SS-01	500.03	1623.66	2123.69
TCGA-44-A4SU-01	-214.02	560.74	346.72
TCGA-49-4486-01	-1555.62	-260.68	-1816.3
TCGA-49-4487-01	518.91	1750.25	2269.17
TCGA-49-4488-01	-538.81	952.61	413.79
TCGA-49-4490-01	69.22	422.16	491.37
TCGA-49-4494-01	-441.17	896.17	455
TCGA-49-4501-01	373.71	1166.92	1540.63
TCGA-49-4505-01	409.47	1593.88	2003.35
TCGA-49-4506-01	-377.23	1325.99	948.76
TCGA-49-4507-01	-390.59	1596.48	1205.89
TCGA-49-4510-01	-383.28	134.65	-248.62
TCGA-49-4512-01	741.51	946.42	1687.93
TCGA-49-4514-01	-809.02	736.9	-72.12
TCGA-49-6742-01	-1066.96	-310.81	-1377.77
TCGA-49-6743-01	360.33	706.77	1067.1
TCGA-49-6744-01	1055.95	1972.73	3028.68
TCGA-49-6745-01	602.25	1535.71	2137.96
TCGA-49-6761-01	-197.34	1072.12	874.78
TCGA-49-6767-01	-478.74	1054.45	575.71
TCGA-49-AAQV-01	-703.28	893.75	190.47
TCGA-49-AAR0-01	-179.27	1253.03	1073.76
TCGA-49-AAR2-01	-802.72	814.21	11.49
TCGA-49-AAR3-01	602.12	2039.42	2641.54
TCGA-49-AAR4-01	-102.76	1933.89	1831.13
TCGA-49-AAR9-01	-961.13	-428.43	-1389.55
TCGA-49-AARE-01	-239.25	487.32	248.08
TCGA-49-AARN-01	-334.94	559.96	225.02
TCGA-49-AARO-01	574.25	1748.28	2322.53
TCGA-49-AARQ-01	-1111.21	617	-494.21
TCGA-49-AARR-01	437.88	1279.55	1717.43
TCGA-4B-A93V-01	-899.27	386.93	-512.34
TCGA-50-5044-01	148.32	1010.87	1159.18
TCGA-50-5045-01	1430.36	2418.37	3848.73
TCGA-50-5049-01	1639.69	2846.07	4485.76
TCGA-50-5051-01	-757.94	-204.87	-962.81
TCGA-50-5055-01	1252.77	2735.92	3988.69
TCGA-50-5066-01	913.2	2207.84	3121.04
TCGA-50-5066-02	-90.17	423.83	333.66
TCGA-50-5068-01	515.4	2162.42	2677.82
TCGA-50-5072-01	-172.59	86.92	-85.67
TCGA-50-5930-01	484.25	1171.53	1655.78
TCGA-50-5931-01	-593.62	-703.47	-1297.09
TCGA-50-5932-01	-718.49	-21.09	-739.58
TCGA-50-5933-01	1425.35	1453.04	2878.39
TCGA-50-5935-01	35	938.7	973.7
TCGA-50-5936-01	147.12	577.59	724.71
TCGA-50-5939-01	457.22	1354.23	1811.45
TCGA-50-5941-01	569.04	2174.4	2743.45
TCGA-50-5942-01	-30.52	501.69	471.17
TCGA-50-5944-01	650.65	562.64	1213.29
TCGA-50-5946-01	-1100.38	-559.22	-1659.61
TCGA-50-5946-02	960.71	324.6	1285.31
TCGA-50-6590-01	337.99	1747.56	2085.55
TCGA-50-6591-01	-917.66	-1355.85	-2273.51
TCGA-50-6592-01	298.71	1411.86	1710.57
TCGA-50-6593-01	767.06	1117.37	1884.43
TCGA-50-6594-01	-318.95	378.12	59.16
TCGA-50-6595-01	1052.86	1101.63	2154.49
TCGA-50-6597-01	-461.69	1239.12	777.44
TCGA-50-6673-01	265.73	552.94	818.66
TCGA-50-7109-01	85.6	683.67	769.27
TCGA-50-8457-01	665.15	1706.71	2371.86
TCGA-50-8459-01	1794.24	1991.35	3785.59
TCGA-50-8460-01	89.89	1476.01	1565.9
TCGA-53-7624-01	-962.99	134.43	-828.56
TCGA-53-7626-01	654.18	2014.96	2669.14
TCGA-53-7813-01	-958.2	321.87	-636.33
TCGA-53-A4EZ-01	-1114.01	-158.97	-1272.99
TCGA-55-1592-01	-83.44	678.65	595.2
TCGA-55-1594-01	-560.24	388.8	-171.44
TCGA-55-1595-01	492.12	657.33	1149.45
TCGA-55-1596-01	-776.21	115.69	-660.52
TCGA-55-5899-01	201.5	546.84	748.34
TCGA-55-6543-01	1.75	1030.03	1031.78
TCGA-55-6642-01	1331.89	1015.45	2347.34
TCGA-55-6712-01	344.08	1724.57	2068.65
TCGA-55-6968-01	-141.36	1004.19	862.82
TCGA-55-6969-01	765.58	1553.53	2319.11
TCGA-55-6970-01	-108.48	1165.87	1057.39
TCGA-55-6971-01	590.76	2188.12	2778.88
TCGA-55-6972-01	-1958.42	-890.33	-2848.75
TCGA-55-6975-01	856.13	320.2	1176.33
TCGA-55-6978-01	1379.97	2104.05	3484.02
TCGA-55-6979-01	971.94	2374.28	3346.23
TCGA-55-6980-01	731.14	1570.8	2301.94
TCGA-55-6981-01	-197.04	377.39	180.35
TCGA-55-6982-01	904.48	1098.55	2003.03
TCGA-55-6983-01	385.8	1311.47	1697.27
TCGA-55-6984-01	-977.46	317.67	-659.8
TCGA-55-6985-01	507.82	1333.03	1840.85
TCGA-55-6986-01	-389.05	795.08	406.03
TCGA-55-6987-01	512.27	2592.94	3105.21
TCGA-55-7227-01	722.58	1529.54	2252.12
TCGA-55-7281-01	625.98	1660.24	2286.22
TCGA-55-7283-01	-340.51	769.03	428.52
TCGA-55-7284-01	203.86	1150.73	1354.59
TCGA-55-7570-01	-830.19	-760.68	-1590.87
TCGA-55-7573-01	176.48	1275.68	1452.16
TCGA-55-7574-01	1026.57	1929.01	2955.58
TCGA-55-7576-01	154.81	812.72	967.54
TCGA-55-7724-01	673.85	1534.79	2208.64
TCGA-55-7725-01	-280.89	1556.43	1275.54
TCGA-55-7726-01	969.53	645.05	1614.58
TCGA-55-7727-01	-396.88	1009.84	612.96
TCGA-55-7728-01	-198.83	2426.3	2227.46
TCGA-55-7815-01	867.86	1254.93	2122.79
TCGA-55-7816-01	1655.48	1701.33	3356.81
TCGA-55-7903-01	-645.51	827.74	182.23
TCGA-55-7907-01	236.51	1114.45	1350.96
TCGA-55-7910-01	-465.83	-32.1	-497.93
TCGA-55-7911-01	-270.08	1628.37	1358.29
TCGA-55-7913-01	-1508.49	-333.2	-1841.7
TCGA-55-7914-01	-133.73	755.31	621.57
TCGA-55-7994-01	-374.59	1675.55	1300.97
TCGA-55-7995-01	-69.72	1934.22	1864.5
TCGA-55-8085-01	-253.73	1308.46	1054.73
TCGA-55-8087-01	-375.95	283.83	-92.11
TCGA-55-8089-01	572.96	2495.84	3068.8
TCGA-55-8090-01	-43.21	771.29	728.08
TCGA-55-8091-01	973.34	1378.71	2352.05
TCGA-55-8092-01	152.69	1472.48	1625.17
TCGA-55-8094-01	-1959.31	-1004.32	-2963.63
TCGA-55-8096-01	944.87	1211.05	2155.92
TCGA-55-8097-01	-64.86	660.76	595.9
TCGA-55-8203-01	-70.47	935.04	864.57
TCGA-55-8204-01	-140.39	834.84	694.45
TCGA-55-8205-01	647.93	2213.07	2861.01
TCGA-55-8206-01	313.09	1882.97	2196.07
TCGA-55-8207-01	931.94	1218.22	2150.16
TCGA-55-8208-01	1229.39	2493.47	3722.86
TCGA-55-8299-01	1285.57	2096.41	3381.98
TCGA-55-8301-01	632.28	2126.21	2758.49
TCGA-55-8302-01	-497.37	760.01	262.65
TCGA-55-8505-01	147.09	-273.52	-126.43
TCGA-55-8506-01	-78.06	812.03	733.97
TCGA-55-8507-01	-301.67	282.23	-19.43
TCGA-55-8508-01	-88.69	728.07	639.38
TCGA-55-8510-01	608.95	1830.03	2438.98
TCGA-55-8511-01	549.38	1367.24	1916.62
TCGA-55-8512-01	-591.69	215.31	-376.38
TCGA-55-8513-01	503.88	1754.91	2258.79
TCGA-55-8514-01	-466.73	640.12	173.39
TCGA-55-8614-01	23.52	236.29	259.81
TCGA-55-8615-01	-727.37	-272.08	-999.45
TCGA-55-8616-01	-419.49	278.38	-141.1
TCGA-55-8619-01	542.51	2150.43	2692.94
TCGA-55-8620-01	-1030.18	433.59	-596.58
TCGA-55-8621-01	979.96	2115.34	3095.3
TCGA-55-A48X-01	86.77	1495.84	1582.61
TCGA-55-A48Y-01	518.75	421.03	939.78
TCGA-55-A48Z-01	562.93	791.06	1353.99
TCGA-55-A490-01	234.04	683.14	917.18
TCGA-55-A491-01	122.44	1166.68	1289.12
TCGA-55-A492-01	-782.79	173.43	-609.36
TCGA-55-A493-01	84.21	1603.38	1687.58
TCGA-55-A494-01	-1324.01	-1014.81	-2338.82
TCGA-55-A4DF-01	-429.06	1137.51	708.45
TCGA-55-A4DG-01	-512.14	904.58	392.44
TCGA-55-A57B-01	248.14	918.24	1166.37
TCGA-62-8394-01	-517.26	375.35	-141.91
TCGA-62-8395-01	286.13	175.31	461.43
TCGA-62-8397-01	-240.22	895.35	655.14
TCGA-62-8398-01	-240.51	695.22	454.71
TCGA-62-8399-01	-73.15	107.36	34.22
TCGA-62-8402-01	-807.52	1313.22	505.7
TCGA-62-A46O-01	-1647.23	-1098.74	-2745.97
TCGA-62-A46P-01	-619.26	-47.42	-666.68
TCGA-62-A46R-01	-93.64	1204.85	1111.21
TCGA-62-A46S-01	-464.19	641.82	177.64
TCGA-62-A46U-01	-5.09	2534.86	2529.77
TCGA-62-A46V-01	103.57	185.23	288.8
TCGA-62-A46Y-01	-332.99	1483.53	1150.54
TCGA-62-A470-01	-703.08	133.7	-569.38
TCGA-62-A471-01	-1446.62	-186.32	-1632.94
TCGA-62-A472-01	-680.93	859.27	178.34
TCGA-64-1676-01	534.96	1720.12	2255.08
TCGA-64-1677-01	-888.39	802.42	-85.97
TCGA-64-1678-01	-1092.84	-609.99	-1702.82
TCGA-64-1679-01	1064.08	877.76	1941.84
TCGA-64-1680-01	-915.82	226.42	-689.4
TCGA-64-1681-01	99.19	948.01	1047.2
TCGA-64-5774-01	-692.62	-529.23	-1221.85
TCGA-64-5775-01	-130.35	407.23	276.87
TCGA-64-5778-01	-537.66	1864.53	1326.87
TCGA-64-5779-01	360.85	725.43	1086.28
TCGA-64-5781-01	6.68	1368.25	1374.93
TCGA-64-5815-01	1457.51	1464.83	2922.34
TCGA-67-3770-01	-189.5	1238.99	1049.5
TCGA-67-3771-01	271.68	1066.71	1338.39
TCGA-67-3772-01	771.41	1171.82	1943.23
TCGA-67-3773-01	422.7	1548.55	1971.25
TCGA-67-3774-01	-6.81	1124.26	1117.45
TCGA-67-4679-01	349.41	1172.87	1522.28
TCGA-67-6215-01	-825.59	693.22	-132.37
TCGA-67-6216-01	-337.91	1315.55	977.64
TCGA-67-6217-01	50.99	1251.38	1302.36
TCGA-69-7760-01	-678.68	-457.5	-1136.18
TCGA-69-7761-01	373.6	1822.97	2196.56
TCGA-69-7763-01	645.59	558.97	1204.56
TCGA-69-7764-01	-412.83	330.91	-81.91
TCGA-69-7765-01	1086.21	1079.11	2165.32
TCGA-69-7973-01	-201.31	-142.75	-344.06
TCGA-69-7974-01	437.33	1577.74	2015.07
TCGA-69-7978-01	939.94	2205.25	3145.2
TCGA-69-7979-01	-199.09	-181.52	-380.61
TCGA-69-7980-01	151.19	1096.91	1248.11
TCGA-69-8253-01	-689.81	379.46	-310.36
TCGA-69-8254-01	-565.74	1026.02	460.27
TCGA-69-8255-01	-987.02	1350.23	363.21
TCGA-69-8453-01	421.26	2188.01	2609.27
TCGA-69-A59K-01	-349.33	761.1	411.77
TCGA-71-6725-01	-953.41	141.19	-812.22
TCGA-71-8520-01	432.86	309.91	742.77
TCGA-73-4658-01	1336.99	1917.98	3254.97
TCGA-73-4659-01	435.09	698.1	1133.19
TCGA-73-4662-01	64.72	1359.37	1424.09
TCGA-73-4666-01	-87.83	1814.71	1726.88
TCGA-73-4668-01	-31.24	191.44	160.2
TCGA-73-4670-01	-34.45	182.59	148.14
TCGA-73-4675-01	174.63	381.76	556.39
TCGA-73-4676-01	-284.68	537.66	252.98
TCGA-73-4677-01	-462.7	605.39	142.7
TCGA-73-7498-01	186.29	685.92	872.21
TCGA-73-7499-01	-102.58	1678.33	1575.74
TCGA-73-A9RS-01	-1064.24	-104.38	-1168.62
TCGA-75-5122-01	688.81	3286.67	3975.48
TCGA-75-5125-01	255.7	1493.59	1749.29
TCGA-75-5126-01	615.01	2175.77	2790.78
TCGA-75-5146-01	-228.78	1050.63	821.85
TCGA-75-5147-01	56.27	1108.3	1164.56
TCGA-75-6203-01	744.6	2188.81	2933.42
TCGA-75-6205-01	1321.03	2536.32	3857.35
TCGA-75-6206-01	150.48	649.07	799.55
TCGA-75-6207-01	-644.98	241.76	-403.22
TCGA-75-6211-01	-179	-73.49	-252.49
TCGA-75-6212-01	-1.06	1540.49	1539.42
TCGA-75-6214-01	-1118.06	-91.39	-1209.45
TCGA-75-7025-01	356.8	1211.78	1568.58
TCGA-75-7027-01	299.69	-73.13	226.57
TCGA-75-7030-01	904.53	1186.74	2091.27
TCGA-75-7031-01	-586.62	883.23	296.62
TCGA-78-7143-01	-856.84	728.44	-128.39
TCGA-78-7145-01	-19.3	431.58	412.28
TCGA-78-7146-01	-724.67	239.26	-485.41
TCGA-78-7147-01	-1030.99	401.51	-629.49
TCGA-78-7148-01	-572.54	420.29	-152.26
TCGA-78-7149-01	-255.7	-147.69	-403.39
TCGA-78-7150-01	-67.35	-407.19	-474.54
TCGA-78-7152-01	-289.63	980.35	690.72
TCGA-78-7153-01	-774.99	31.06	-743.93
TCGA-78-7154-01	-567.99	-166.77	-734.76
TCGA-78-7155-01	-1206.67	-639.02	-1845.69
TCGA-78-7156-01	-841.28	-228.36	-1069.64
TCGA-78-7158-01	-790.49	69.42	-721.07
TCGA-78-7159-01	-92.51	104.02	11.51
TCGA-78-7160-01	555.45	1564.1	2119.55
TCGA-78-7161-01	-365	-559.96	-924.96
TCGA-78-7162-01	235.08	1047.91	1283
TCGA-78-7163-01	-1926.5	-204.63	-2131.13
TCGA-78-7166-01	-1109.82	187.51	-922.31
TCGA-78-7167-01	-754.65	-380.76	-1135.42
TCGA-78-7220-01	-881.72	-429.82	-1311.53
TCGA-78-7535-01	-226	1204.4	978.4
TCGA-78-7536-01	-511.46	653.59	142.13
TCGA-78-7537-01	-17.33	243.82	226.49
TCGA-78-7539-01	-313.48	1514.13	1200.65
TCGA-78-7540-01	-910.95	401.41	-509.54
TCGA-78-7542-01	-1411.15	335.17	-1075.98
TCGA-78-7633-01	-653.54	-337.96	-991.5
TCGA-78-8640-01	-842.08	495.31	-346.77
TCGA-78-8648-01	1939.43	2471.95	4411.38
TCGA-78-8655-01	12.6	1264.9	1277.49
TCGA-78-8660-01	-104.42	1661.9	1557.48
TCGA-78-8662-01	-1050.79	-446.71	-1497.51
TCGA-80-5607-01	-310.11	1154.88	844.77
TCGA-80-5608-01	-833.11	284.49	-548.62
TCGA-80-5611-01	-350.78	1564.17	1213.39
TCGA-83-5908-01	212.01	1830.63	2042.64
TCGA-86-6562-01	700.02	577.68	1277.7
TCGA-86-6851-01	304.41	2246.5	2550.9
TCGA-86-7701-01	561.46	1485.1	2046.57
TCGA-86-7711-01	540.5	1246.27	1786.76
TCGA-86-7713-01	-1116.3	-568.26	-1684.57
TCGA-86-7714-01	-56.39	860.95	804.56
TCGA-86-7953-01	32.37	1306.8	1339.18
TCGA-86-7954-01	349.27	1723.88	2073.15
TCGA-86-7955-01	-1774.01	-934.73	-2708.74
TCGA-86-8054-01	-676.66	-621.28	-1297.94
TCGA-86-8055-01	1229.16	898.35	2127.52
TCGA-86-8056-01	-96.79	817.3	720.51
TCGA-86-8073-01	333.15	529.26	862.41
TCGA-86-8074-01	639.36	867.19	1506.56
TCGA-86-8075-01	1090.75	912.49	2003.24
TCGA-86-8076-01	66.86	1860	1926.86
TCGA-86-8278-01	381.27	731.87	1113.14
TCGA-86-8279-01	241.37	74.03	315.4
TCGA-86-8280-01	611.91	1600.49	2212.41
TCGA-86-8281-01	-402.9	159.13	-243.78
TCGA-86-8358-01	-617.74	-263.38	-881.12
TCGA-86-8359-01	-369.79	1166.42	796.63
TCGA-86-8585-01	-118.7	1648.05	1529.35
TCGA-86-8668-01	716.37	1089.62	1806
TCGA-86-8669-01	-388.39	744.53	356.14
TCGA-86-8671-01	1394.5	2905.3	4299.81
TCGA-86-8672-01	457.64	1380.47	1838.11
TCGA-86-8673-01	-138.92	521.22	382.3
TCGA-86-8674-01	-1110.3	-506.36	-1616.66
TCGA-86-A456-01	128.48	1206.48	1334.96
TCGA-86-A4D0-01	-1233.81	-279.35	-1513.16
TCGA-86-A4JF-01	-412.06	1148.44	736.38
TCGA-86-A4P7-01	468.31	1483.82	1952.13
TCGA-86-A4P8-01	914.62	2466.21	3380.83
TCGA-91-6828-01	522.58	1559.91	2082.49
TCGA-91-6829-01	1133.05	334.11	1467.16
TCGA-91-6830-01	662.42	1121.7	1784.12
TCGA-91-6831-01	623.64	675.8	1299.44
TCGA-91-6835-01	889.87	2383.01	3272.87
TCGA-91-6836-01	-1044.37	-40.84	-1085.21
TCGA-91-6840-01	-353.97	644.69	290.72
TCGA-91-6847-01	-1800.3	-975.56	-2775.86
TCGA-91-6848-01	1015.64	1540.41	2556.05
TCGA-91-6849-01	-66.35	1208.09	1141.74
TCGA-91-7771-01	646.44	1633.44	2279.88
TCGA-91-8496-01	-7.83	1772.54	1764.71
TCGA-91-8497-01	460.48	1619.55	2080.03
TCGA-91-8499-01	-485.42	399.84	-85.58
TCGA-91-A4BC-01	962.48	2279.43	3241.92
TCGA-91-A4BD-01	-707.39	1485.39	778
TCGA-93-7347-01	874	2212.91	3086.91
TCGA-93-7348-01	423.65	737.06	1160.72
TCGA-93-8067-01	-717.86	45.21	-672.65
TCGA-93-A4JN-01	173.2	727.37	900.58
TCGA-93-A4JO-01	344.7	1898.74	2243.44
TCGA-93-A4JP-01	370.73	1175.01	1545.74
TCGA-93-A4JQ-01	805.11	1754.53	2559.64
TCGA-95-7039-01	-15.51	326.9	311.39
TCGA-95-7043-01	-660.62	-624.74	-1285.36
TCGA-95-7562-01	-149.93	681.77	531.84
TCGA-95-7567-01	36.85	754.17	791.01
TCGA-95-7944-01	24.14	1836.14	1860.28
TCGA-95-7947-01	-866.7	621.22	-245.48
TCGA-95-7948-01	-575.76	138.89	-436.87
TCGA-95-8039-01	-71.44	1382	1310.56
TCGA-95-8494-01	-581.14	867.64	286.5
TCGA-95-A4VK-01	-519.51	707.03	187.52
TCGA-95-A4VN-01	149.1	1743.76	1892.86
TCGA-95-A4VP-01	127.65	984.41	1112.07
TCGA-97-7546-01	659.77	1221.68	1881.45
TCGA-97-7547-01	47.88	616.86	664.73
TCGA-97-7552-01	311.03	2267.1	2578.12
TCGA-97-7553-01	807.24	2375.74	3182.98
TCGA-97-7554-01	1054.4	837.9	1892.29
TCGA-97-7937-01	-299.04	-38.36	-337.39
TCGA-97-7938-01	-103.95	385.76	281.81
TCGA-97-7941-01	5.96	697.48	703.44
TCGA-97-8171-01	-1263.52	-404.22	-1667.74
TCGA-97-8172-01	798.9	1642.24	2441.15
TCGA-97-8174-01	759.14	1072.77	1831.91
TCGA-97-8175-01	-354.97	1120.1	765.14
TCGA-97-8176-01	-468.26	528.15	59.89
TCGA-97-8177-01	890.52	1682.16	2572.68
TCGA-97-8179-01	-203.94	238.11	34.17
TCGA-97-8547-01	933.31	816	1749.31
TCGA-97-8552-01	-56.58	1425.01	1368.44
TCGA-97-A4LX-01	1073.04	2312.56	3385.61
TCGA-97-A4M0-01	-353.83	1550.94	1197.11
TCGA-97-A4M1-01	-62.73	1148.37	1085.64
TCGA-97-A4M2-01	310.71	2085.83	2396.55
TCGA-97-A4M3-01	-96.53	-49.79	-146.32
TCGA-97-A4M5-01	455.52	1140.02	1595.54
TCGA-97-A4M6-01	323.17	1743.83	2067
TCGA-97-A4M7-01	351.63	1686.79	2038.42
TCGA-99-7458-01	734.9	1603.9	2338.8
TCGA-99-8025-01	-12.83	124.59	111.77
TCGA-99-8028-01	1305.02	2756.73	4061.75
TCGA-99-8032-01	507.44	341.74	849.18
TCGA-99-8033-01	-311.45	1082.74	771.29
TCGA-99-AA5R-01	876.07	2313.11	3189.18
TCGA-J2-8192-01	1487.82	1558.13	3045.95
TCGA-J2-8194-01	119.69	630.25	749.95
TCGA-J2-A4AD-01	-432.07	-399.89	-831.96
TCGA-J2-A4AE-01	-605.53	1057.3	451.77
TCGA-J2-A4AG-01	334.08	1381.48	1715.55
TCGA-L4-A4E5-01	-707.04	26.44	-680.6
TCGA-L4-A4E6-01	934.25	2309.16	3243.41
TCGA-L9-A443-01	190.21	473.85	664.06
TCGA-L9-A444-01	598.66	2247.22	2845.88
TCGA-L9-A50W-01	-443.11	673.3	230.19
TCGA-L9-A5IP-01	-713.87	503.8	-210.07
TCGA-L9-A743-01	601.71	1926.79	2528.5
TCGA-L9-A7SV-01	-1057.04	-241.17	-1298.21
TCGA-L9-A8F4-01	85.67	1507.06	1592.73
TCGA-MN-A4N1-01	-670.72	-248.15	-918.87
TCGA-MN-A4N4-01	554.3	502.62	1056.92
TCGA-MN-A4N5-01	-654.03	911.88	257.85
TCGA-MP-A4SV-01	-31.72	1142.36	1110.64
TCGA-MP-A4SW-01	-55.39	1282.55	1227.16
TCGA-MP-A4SY-01	514.21	460.25	974.46
TCGA-MP-A4T4-01	709.1	1941.73	2650.84
TCGA-MP-A4T6-01	-1165.17	843.52	-321.65
TCGA-MP-A4T7-01	-689.28	760.09	70.82
TCGA-MP-A4T8-01	-62.11	-250.01	-312.11
TCGA-MP-A4T9-01	291.21	1080.11	1371.32
TCGA-MP-A4TA-01	-430.12	584.79	154.67
TCGA-MP-A4TC-01	876.36	1139.87	2016.23
TCGA-MP-A4TD-01	746.26	764.72	1510.98
TCGA-MP-A4TE-01	-1233.68	-792.11	-2025.79
TCGA-MP-A4TF-01	-1257.44	188.26	-1069.18
TCGA-MP-A4TH-01	106.63	1736.31	1842.94
TCGA-MP-A4TI-01	1180.44	2588.41	3768.84
TCGA-MP-A4TJ-01	912.74	2446.84	3359.58
TCGA-MP-A4TK-01	1259	1478.45	2737.45
TCGA-MP-A5C7-01	-1179.69	-553.01	-1732.69
TCGA-NJ-A4YF-01	-802.78	-168.6	-971.38
TCGA-NJ-A4YG-01	127.1	1076.06	1203.16
TCGA-NJ-A4YI-01	80.5	936.15	1016.64
TCGA-NJ-A4YP-01	746.63	594.12	1340.75
TCGA-NJ-A4YQ-01	-63.7	2022.22	1958.52
TCGA-NJ-A55A-01	197.29	1419.34	1616.63
TCGA-NJ-A55O-01	-339.44	922.95	583.51
TCGA-NJ-A55R-01	-437.48	-189.12	-626.6
TCGA-NJ-A7XG-01	-1710.14	-282.7	-1992.84
TCGA-O1-A52J-01	-297.9	1265.87	967.97
TCGA-S2-AA1A-01	735.65	1916.74	2652.39

## Sheet: LUSC
Supplementary Table 4. Stromal cell score, immune cell score, and overall estimate score of LUAD and LUAC calculated by ESTIMATE algorithm.
ID	Stromal_score	Immune_score	ESTIMATE_score
TCGA-18-3406-01	480.42	1327.02	1807.44
TCGA-18-3407-01	196.27	291.63	487.9
TCGA-18-3408-01	-58.99	524.56	465.57
TCGA-18-3409-01	1351.68	736.86	2088.54
TCGA-18-3410-01	-356.13	1326.71	970.58
TCGA-18-3411-01	-120.61	682.31	561.7
TCGA-18-3412-01	-681.5	159.19	-522.31
TCGA-18-3414-01	-459.08	376.17	-82.91
TCGA-18-3415-01	60.99	806.03	867.02
TCGA-18-3416-01	-585.83	1631.99	1046.16
TCGA-18-3417-01	701.27	417.59	1118.86
TCGA-18-3419-01	-962.85	727.04	-235.81
TCGA-18-3421-01	-605.54	708.08	102.54
TCGA-18-4083-01	-56.98	69.94	12.95
TCGA-18-4086-01	118.36	587.74	706.1
TCGA-18-4721-01	468.99	1274.86	1743.85
TCGA-18-5592-01	-869.18	-239.84	-1109.02
TCGA-18-5595-01	-1201.89	-865.91	-2067.81
TCGA-21-1070-01	-108.23	1575.84	1467.61
TCGA-21-1071-01	-95.36	321.14	225.78
TCGA-21-1072-01	-625.76	-449.31	-1075.08
TCGA-21-1075-01	-1347.27	-1075.44	-2422.71
TCGA-21-1076-01	1137.14	2233.77	3370.91
TCGA-21-1077-01	-280.01	388.63	108.62
TCGA-21-1078-01	-1782.79	-749.42	-2532.21
TCGA-21-1079-01	277.55	74.77	352.32
TCGA-21-1080-01	-916.3	179.28	-737.03
TCGA-21-1081-01	-124.86	-478.57	-603.43
TCGA-21-1082-01	-39.85	734.31	694.46
TCGA-21-1083-01	-221.08	610.91	389.83
TCGA-21-5782-01	-39.49	126.87	87.38
TCGA-21-5783-01	-235.04	-590.44	-825.48
TCGA-21-5784-01	-101.32	1120.51	1019.19
TCGA-21-5786-01	-353.81	-117.97	-471.78
TCGA-21-5787-01	10.02	1544.64	1554.66
TCGA-21-A5DI-01	-906.37	-426.13	-1332.5
TCGA-22-0940-01	182.55	1647.35	1829.91
TCGA-22-0944-01	-1157.06	-480.48	-1637.54
TCGA-22-1000-01	1478.49	1908.01	3386.5
TCGA-22-1002-01	424.72	807.73	1232.44
TCGA-22-1005-01	727.59	2466.57	3194.16
TCGA-22-1011-01	49.59	1388.79	1438.38
TCGA-22-1012-01	-618.73	263.89	-354.84
TCGA-22-1016-01	702.58	1194.96	1897.54
TCGA-22-1017-01	-735	694.66	-40.33
TCGA-22-4591-01	-1172.99	-305.47	-1478.46
TCGA-22-4593-01	380.75	-342.52	38.24
TCGA-22-4594-01	416.76	1356.24	1773.01
TCGA-22-4595-01	342.27	836.38	1178.65
TCGA-22-4596-01	1217.57	2378.09	3595.66
TCGA-22-4599-01	0.75	1598.79	1599.54
TCGA-22-4601-01	-815.3	-227.57	-1042.87
TCGA-22-4604-01	998.61	1230.68	2229.29
TCGA-22-4605-01	514.48	847.86	1362.34
TCGA-22-4607-01	-109.53	450.67	341.13
TCGA-22-4609-01	651.12	1560.81	2211.93
TCGA-22-4613-01	-432.62	974.47	541.85
TCGA-22-5471-01	-383.48	1119.17	735.69
TCGA-22-5472-01	-364.56	583.24	218.69
TCGA-22-5473-01	-496.35	-103.42	-599.76
TCGA-22-5474-01	-16.77	1516.32	1499.55
TCGA-22-5477-01	-980.43	-226.87	-1207.3
TCGA-22-5478-01	31.01	171.5	202.51
TCGA-22-5479-01	-431.5	166.34	-265.16
TCGA-22-5480-01	-123.9	1286.04	1162.15
TCGA-22-5481-01	-723.86	731.58	7.72
TCGA-22-5482-01	-509.1	-404.88	-913.98
TCGA-22-5483-01	251.79	257.15	508.94
TCGA-22-5485-01	-738.08	-153.44	-891.52
TCGA-22-5489-01	1047.23	1659.65	2706.87
TCGA-22-5491-01	-1515.4	-165.84	-1681.25
TCGA-22-5492-01	-14.39	1356.21	1341.81
TCGA-22-A5C4-01	-1025.71	-270	-1295.71
TCGA-33-4532-01	-1566.59	-715.94	-2282.53
TCGA-33-4533-01	-82.67	-592.04	-674.71
TCGA-33-4538-01	-1021.14	-99.03	-1120.17
TCGA-33-4547-01	-109.98	342.96	232.97
TCGA-33-4566-01	-316.24	1248.54	932.29
TCGA-33-4582-01	-1355.39	-611.53	-1966.91
TCGA-33-4583-01	-1354.61	179.46	-1175.15
TCGA-33-4586-01	-768.14	-415.86	-1183.99
TCGA-33-4587-01	-939.1	-701.82	-1640.91
TCGA-33-4589-01	-397.19	1337.28	940.09
TCGA-33-6737-01	-89.91	499.82	409.91
TCGA-33-6738-01	-1344.11	-63.54	-1407.65
TCGA-33-A4WN-01	-1088.78	-166.63	-1255.41
TCGA-33-A5GW-01	-1727.64	-817.66	-2545.3
TCGA-33-AAS8-01	-1774.87	-652.86	-2427.73
TCGA-33-AASB-01	-2108.49	-900.19	-3008.68
TCGA-33-AASD-01	-929.6	-511.35	-1440.96
TCGA-33-AASI-01	-1142.29	544.69	-597.6
TCGA-33-AASJ-01	-1816.35	-637.23	-2453.58
TCGA-33-AASL-01	-1535.7	163.36	-1372.34
TCGA-34-2596-01	-340.19	365.99	25.8
TCGA-34-2600-01	-1519.82	-460.42	-1980.25
TCGA-34-2608-01	1110.66	1478.26	2588.93
TCGA-34-5231-01	-673.34	125.1	-548.24
TCGA-34-5232-01	-707.77	1645.28	937.51
TCGA-34-5234-01	1318.16	2107.92	3426.09
TCGA-34-5236-01	778.57	567.65	1346.23
TCGA-34-5239-01	1037.19	1290.56	2327.75
TCGA-34-5240-01	-49.51	26.54	-22.96
TCGA-34-5241-01	659.07	1325.64	1984.71
TCGA-34-5927-01	-961.66	-790.44	-1752.09
TCGA-34-5928-01	1052.44	505.4	1557.84
TCGA-34-5929-01	-535.88	105.62	-430.26
TCGA-34-7107-01	517.17	71.84	589.01
TCGA-34-8454-01	357.59	1478.61	1836.2
TCGA-34-8455-01	-178.23	-30.34	-208.57
TCGA-34-8456-01	-576.61	-73.06	-649.67
TCGA-34-A5IX-01	-1107.57	195.53	-912.04
TCGA-37-3783-01	144.89	1659.91	1804.8
TCGA-37-3789-01	-365.68	952.57	586.89
TCGA-37-3792-01	576.58	2540.27	3116.85
TCGA-37-4129-01	-1314.84	-1336.39	-2651.23
TCGA-37-4130-01	-199.83	2523.93	2324.1
TCGA-37-4132-01	-279.74	848.97	569.23
TCGA-37-4133-01	-537.65	592.12	54.47
TCGA-37-4135-01	-724.63	393.85	-330.77
TCGA-37-4141-01	-416.73	437.08	20.35
TCGA-37-5819-01	-667.93	-31.24	-699.17
TCGA-37-A5EL-01	-1766.44	-446.87	-2213.31
TCGA-37-A5EM-01	689.3	949.82	1639.11
TCGA-37-A5EN-01	-1041.61	-122.62	-1164.23
TCGA-39-5011-01	-149.24	1986.79	1837.54
TCGA-39-5016-01	-936.8	980.11	43.31
TCGA-39-5019-01	-74.73	492.87	418.14
TCGA-39-5021-01	-215.61	643.45	427.84
TCGA-39-5022-01	793.96	2160.62	2954.58
TCGA-39-5024-01	-1120.63	324.13	-796.5
TCGA-39-5027-01	-1904.52	-949.53	-2854.04
TCGA-39-5028-01	248.97	785.03	1034
TCGA-39-5029-01	-283.95	736.42	452.47
TCGA-39-5030-01	980.8	2258.76	3239.56
TCGA-39-5031-01	-10.68	635.53	624.85
TCGA-39-5034-01	360.76	319.33	680.1
TCGA-39-5035-01	-252.37	1314.96	1062.59
TCGA-39-5036-01	-1817.39	-140.12	-1957.51
TCGA-39-5037-01	-2209.56	-991.7	-3201.26
TCGA-39-5039-01	424.98	484.51	909.49
TCGA-39-5040-01	-864.34	-280.47	-1144.82
TCGA-43-2576-01	828.86	1458.09	2286.95
TCGA-43-2578-01	-586.14	97.29	-488.85
TCGA-43-2581-01	716.39	1730.12	2446.51
TCGA-43-3394-01	-628.47	-327.66	-956.12
TCGA-43-3920-01	579.81	749.64	1329.45
TCGA-43-5668-01	169.93	1698.37	1868.29
TCGA-43-5670-01	-1327.64	-856.23	-2183.87
TCGA-43-6143-01	-347.4	-488.4	-835.79
TCGA-43-6647-01	1335.43	1303.22	2638.65
TCGA-43-6770-01	-20.31	0.76	-19.55
TCGA-43-6771-01	109.02	545.55	654.58
TCGA-43-6773-01	1145.2	1947.08	3092.28
TCGA-43-7656-01	58.45	1281.76	1340.21
TCGA-43-7657-01	-260.02	-662.25	-922.26
TCGA-43-7658-01	-1384.07	487.19	-896.88
TCGA-43-8115-01	1308.23	1514.12	2822.35
TCGA-43-8116-01	-661.26	445.94	-215.32
TCGA-43-8118-01	-112.55	675.11	562.56
TCGA-43-A474-01	-736.63	-1100.6	-1837.24
TCGA-43-A475-01	-49.85	2055.85	2006.01
TCGA-43-A56U-01	247.62	2186	2433.62
TCGA-43-A56V-01	-863.01	-181.9	-1044.91
TCGA-46-3765-01	-257.17	471.53	214.36
TCGA-46-3766-01	1760.23	2064.49	3824.72
TCGA-46-3767-01	1478.16	1486.76	2964.92
TCGA-46-3768-01	-777.8	-102.51	-880.31
TCGA-46-3769-01	216.97	1195.48	1412.45
TCGA-46-6025-01	-733.42	-236.55	-969.97
TCGA-46-6026-01	-1573.05	-691.45	-2264.5
TCGA-51-4079-01	-309.01	379.82	70.81
TCGA-51-4080-01	-1235.57	-528.72	-1764.29
TCGA-51-4081-01	-198.56	-849.48	-1048.04
TCGA-51-6867-01	-439.33	90.09	-349.24
TCGA-52-7622-01	92.14	1285.55	1377.69
TCGA-52-7809-01	-890.8	-397.97	-1288.78
TCGA-52-7810-01	-844.19	-554.38	-1398.56
TCGA-52-7811-01	-72.15	522.69	450.53
TCGA-52-7812-01	-630.33	1180.65	550.33
TCGA-56-1622-01	-890.47	-762.91	-1653.37
TCGA-56-5897-01	1284.99	1489.38	2774.37
TCGA-56-5898-01	-70.65	431.28	360.63
TCGA-56-6545-01	1336.86	1341	2677.86
TCGA-56-6546-01	159.91	1428.92	1588.84
TCGA-56-7221-01	-1418.44	-643.44	-2061.88
TCGA-56-7222-01	-1343.81	-432.98	-1776.8
TCGA-56-7223-01	-1341.26	-1651.61	-2992.86
TCGA-56-7579-01	-492.69	-5.69	-498.38
TCGA-56-7580-01	-754.08	-137.84	-891.92
TCGA-56-7582-01	-331.24	219.87	-111.37
TCGA-56-7730-01	-1874.22	-1161.77	-3035.98
TCGA-56-7731-01	535.49	1123.57	1659.05
TCGA-56-7822-01	-558.24	188.45	-369.78
TCGA-56-7823-01	-1247.3	-401.86	-1649.15
TCGA-56-8082-01	-1159.79	-573.82	-1733.61
TCGA-56-8083-01	-897.71	-1336.82	-2234.53
TCGA-56-8201-01	1053.73	2188.86	3242.59
TCGA-56-8304-01	-1281.98	234.79	-1047.19
TCGA-56-8305-01	-448.26	-295.8	-744.06
TCGA-56-8307-01	-773.9	924.18	150.28
TCGA-56-8308-01	-207.84	227.15	19.31
TCGA-56-8309-01	633.81	2326	2959.82
TCGA-56-8503-01	1283.23	1432.3	2715.53
TCGA-56-8504-01	-207.06	483.67	276.61
TCGA-56-8622-01	108.86	263.79	372.64
TCGA-56-8623-01	1024.42	2536.5	3560.92
TCGA-56-8624-01	5.7	205.13	210.83
TCGA-56-8625-01	1259.44	2168.04	3427.48
TCGA-56-8626-01	-270.91	158.49	-112.42
TCGA-56-8628-01	571.12	1273.93	1845.04
TCGA-56-8629-01	-751.64	-108.78	-860.41
TCGA-56-A49D-01	-510.88	1039.8	528.91
TCGA-56-A4BW-01	-256.37	317.91	61.54
TCGA-56-A4BX-01	-1994.46	-1330.52	-3324.97
TCGA-56-A4BY-01	-796.31	-189.3	-985.61
TCGA-56-A4ZJ-01	1026.31	1345.46	2371.77
TCGA-56-A4ZK-01	-363.46	942.88	579.42
TCGA-56-A5DR-01	-369.43	122.63	-246.8
TCGA-56-A5DS-01	-527.82	637.73	109.91
TCGA-56-A62T-01	-311.02	107.24	-203.78
TCGA-58-8386-01	236.61	1044.2	1280.81
TCGA-58-8387-01	-775.17	1230.98	455.81
TCGA-58-8388-01	299.72	801.93	1101.66
TCGA-58-8390-01	137.87	165.1	302.97
TCGA-58-8391-01	-1210.65	-440.99	-1651.64
TCGA-58-8392-01	-1445.42	-641.94	-2087.36
TCGA-58-8393-01	53.32	1575.64	1628.95
TCGA-58-A46J-01	-537.52	478.92	-58.61
TCGA-58-A46K-01	-1023.17	-315.07	-1338.24
TCGA-58-A46L-01	-198.84	461.73	262.89
TCGA-58-A46M-01	-825.86	575.93	-249.93
TCGA-58-A46N-01	-1516.38	-772.52	-2288.9
TCGA-60-2695-01	-426.44	241.57	-184.87
TCGA-60-2696-01	-168.83	908.78	739.94
TCGA-60-2697-01	836.34	2363.69	3200.03
TCGA-60-2698-01	7.38	1371.51	1378.89
TCGA-60-2703-01	193.26	-381	-187.74
TCGA-60-2704-01	1488.39	1632.67	3121.06
TCGA-60-2706-01	-176.72	1069.23	892.51
TCGA-60-2707-01	438.27	670.43	1108.7
TCGA-60-2708-01	706.25	-109.8	596.45
TCGA-60-2709-01	1253.42	1888.32	3141.74
TCGA-60-2710-01	78.38	822.05	900.43
TCGA-60-2711-01	-1114	-27.09	-1141.09
TCGA-60-2712-01	824.67	2035.26	2859.93
TCGA-60-2713-01	893.83	1286.03	2179.87
TCGA-60-2714-01	-213.67	925.77	712.1
TCGA-60-2715-01	1342.42	1746.74	3089.16
TCGA-60-2716-01	-1564.57	-965.63	-2530.19
TCGA-60-2719-01	-869.29	152.46	-716.83
TCGA-60-2720-01	-198.19	1170.31	972.12
TCGA-60-2721-01	267.59	1246.18	1513.77
TCGA-60-2722-01	-1058.54	-453.14	-1511.68
TCGA-60-2723-01	82.39	984.8	1067.19
TCGA-60-2724-01	400.31	2.52	402.82
TCGA-60-2725-01	634.13	1778.52	2412.65
TCGA-60-2726-01	-963.92	392.9	-571.02
TCGA-63-5128-01	-650.99	-629.53	-1280.52
TCGA-63-5131-01	-898.9	-109.18	-1008.08
TCGA-63-6202-01	638.01	2004.29	2642.3
TCGA-63-7020-01	-466.99	768.51	301.51
TCGA-63-7021-01	91.6	860.3	951.9
TCGA-63-7022-01	1612.16	1857.44	3469.59
TCGA-63-7023-01	-826.42	-124.39	-950.81
TCGA-63-A5M9-01	-461.6	73.47	-388.13
TCGA-63-A5MB-01	-917.47	-190.6	-1108.07
TCGA-63-A5MG-01	-192.51	727.5	534.99
TCGA-63-A5MH-01	-891.57	-544.93	-1436.5
TCGA-63-A5MI-01	-1158.99	-800.39	-1959.38
TCGA-63-A5MJ-01	143.47	-12.35	131.12
TCGA-63-A5ML-01	-450.08	-20.76	-470.84
TCGA-63-A5MM-01	684.34	1556.31	2240.65
TCGA-63-A5MN-01	948.35	2281.54	3229.89
TCGA-63-A5MP-01	-409.49	1065.33	655.84
TCGA-63-A5MR-01	-1042.91	-7.48	-1050.39
TCGA-63-A5MS-01	487.42	1199.37	1686.79
TCGA-63-A5MT-01	91.39	825.41	916.8
TCGA-63-A5MU-01	-1710.39	-749.54	-2459.93
TCGA-63-A5MV-01	285.27	836.86	1122.12
TCGA-63-A5MW-01	174.36	-676.2	-501.84
TCGA-63-A5MY-01	-2047.35	-1162.74	-3210.1
TCGA-66-2727-01	-463.79	347.83	-115.96
TCGA-66-2734-01	332.51	1139.64	1472.15
TCGA-66-2737-01	1087.42	777.68	1865.1
TCGA-66-2742-01	-235.3	513.34	278.04
TCGA-66-2744-01	543.96	2123.36	2667.32
TCGA-66-2753-01	-122.58	295.73	173.15
TCGA-66-2754-01	-1298.01	-880.53	-2178.54
TCGA-66-2755-01	460.99	1984.26	2445.25
TCGA-66-2756-01	-722.41	-260.32	-982.73
TCGA-66-2757-01	-311.95	426.18	114.23
TCGA-66-2758-01	-411	1214.38	803.38
TCGA-66-2759-01	-138.27	788.32	650.05
TCGA-66-2763-01	-589.05	274.63	-314.41
TCGA-66-2765-01	-56.79	1071.81	1015.03
TCGA-66-2766-01	-630.45	-69.03	-699.48
TCGA-66-2767-01	489.17	2123.97	2613.14
TCGA-66-2768-01	-667.23	849.41	182.18
TCGA-66-2769-01	725.46	1543.33	2268.79
TCGA-66-2770-01	292.79	779.04	1071.83
TCGA-66-2771-01	87.09	1937.25	2024.34
TCGA-66-2773-01	-144.78	1097.84	953.06
TCGA-66-2777-01	-24.35	1055.07	1030.72
TCGA-66-2778-01	-710.07	961.02	250.95
TCGA-66-2780-01	157.45	548.61	706.06
TCGA-66-2781-01	-368.57	235.55	-133.01
TCGA-66-2782-01	257.12	1215.03	1472.16
TCGA-66-2783-01	-269.12	447.98	178.87
TCGA-66-2785-01	-9.41	1761.48	1752.07
TCGA-66-2786-01	-239.56	924.4	684.84
TCGA-66-2787-01	84.22	863.94	948.16
TCGA-66-2788-01	774.19	1084.91	1859.09
TCGA-66-2789-01	371.21	332.36	703.56
TCGA-66-2790-01	20.31	553.44	573.75
TCGA-66-2791-01	413.12	1485.14	1898.26
TCGA-66-2792-01	-296.68	-151.88	-448.56
TCGA-66-2793-01	-1673.39	-1200.28	-2873.67
TCGA-66-2794-01	-678.05	1468.99	790.94
TCGA-66-2795-01	480.65	838.06	1318.7
TCGA-66-2800-01	-15.82	882.69	866.87
TCGA-68-7755-01	-294.37	-610.12	-904.49
TCGA-68-7756-01	-230.82	117.41	-113.42
TCGA-68-7757-01	300.51	334.93	635.44
TCGA-68-8250-01	-388.59	612.42	223.83
TCGA-68-8251-01	466.58	668.93	1135.51
TCGA-68-A59I-01	292.3	781.78	1074.09
TCGA-68-A59J-01	-550.23	689.42	139.19
TCGA-6A-AB49-01	-2114.97	-581.12	-2696.09
TCGA-70-6722-01	595.7	919.39	1515.1
TCGA-70-6723-01	-1592	-927.62	-2519.62
TCGA-77-6842-01	185.32	1732.01	1917.33
TCGA-77-6843-01	-1361.11	-985.18	-2346.29
TCGA-77-6844-01	-946.02	67.21	-878.82
TCGA-77-6845-01	-1095.83	-1043.43	-2139.25
TCGA-77-7138-01	-1036.81	-123.48	-1160.3
TCGA-77-7139-01	-719.15	-186.02	-905.17
TCGA-77-7140-01	-508.55	-513.92	-1022.47
TCGA-77-7141-01	-937.73	-427.67	-1365.41
TCGA-77-7142-01	-361.23	28.09	-333.14
TCGA-77-7335-01	1757.3	2137.29	3894.59
TCGA-77-7337-01	572.18	388.75	960.93
TCGA-77-7338-01	362.65	360.18	722.84
TCGA-77-7463-01	-1059.84	3.75	-1056.1
TCGA-77-7465-01	-289.16	1279.72	990.55
TCGA-77-8007-01	656.29	1595.48	2251.77
TCGA-77-8008-01	1514.55	1233.87	2748.41
TCGA-77-8009-01	-559.73	-336.43	-896.16
TCGA-77-8128-01	-185.18	-1112.47	-1297.66
TCGA-77-8130-01	299.5	-105.27	194.23
TCGA-77-8131-01	831.53	2383.49	3215.02
TCGA-77-8133-01	-454.48	1251.92	797.43
TCGA-77-8136-01	657.03	1510.21	2167.24
TCGA-77-8138-01	214.7	790.55	1005.25
TCGA-77-8139-01	-108.36	61.41	-46.95
TCGA-77-8140-01	-1326.32	-516.46	-1842.79
TCGA-77-8143-01	-1462.18	-189.7	-1651.88
TCGA-77-8144-01	-1108.94	-48.41	-1157.35
TCGA-77-8145-01	525.03	-184.95	340.08
TCGA-77-8146-01	-430.68	198.97	-231.71
TCGA-77-8148-01	-214.04	-141.97	-356.01
TCGA-77-8150-01	-583.77	547.17	-36.61
TCGA-77-8153-01	-1304.56	-1045.84	-2350.4
TCGA-77-8154-01	-1054.21	-938.14	-1992.35
TCGA-77-8156-01	405.16	1495.19	1900.36
TCGA-77-A5FZ-01	1482.1	3087.39	4569.49
TCGA-77-A5G1-01	-159.91	875.55	715.65
TCGA-77-A5G3-01	-728.07	-246.64	-974.7
TCGA-77-A5G6-01	-1294.32	-547.64	-1841.96
TCGA-77-A5G7-01	-1590.81	-592.97	-2183.78
TCGA-77-A5G8-01	-508.37	186.26	-322.11
TCGA-77-A5GA-01	-1069.48	-194.29	-1263.77
TCGA-77-A5GB-01	193.94	870.02	1063.96
TCGA-77-A5GF-01	-503.14	-14.87	-518.01
TCGA-77-A5GH-01	461.22	1743.87	2205.09
TCGA-79-5596-01	-1054.01	-642.05	-1696.06
TCGA-85-6175-01	1713.28	1396.45	3109.73
TCGA-85-6560-01	501.66	810.7	1312.36
TCGA-85-6561-01	1311.09	1436.56	2747.64
TCGA-85-6798-01	-257.86	-755.71	-1013.57
TCGA-85-7696-01	-448.61	9.04	-439.56
TCGA-85-7697-01	-363.76	344.73	-19.04
TCGA-85-7698-01	335.72	533.76	869.49
TCGA-85-7699-01	411.88	1416.13	1828.01
TCGA-85-7710-01	-837.8	440.05	-397.75
TCGA-85-7843-01	99.46	314.79	414.25
TCGA-85-7844-01	370.99	315.9	686.89
TCGA-85-7950-01	535.88	913.51	1449.39
TCGA-85-8048-01	713.78	1838.92	2552.69
TCGA-85-8049-01	985.87	1729.98	2715.85
TCGA-85-8052-01	-636.86	-122.06	-758.92
TCGA-85-8070-01	-1912.11	-1076.64	-2988.75
TCGA-85-8071-01	-1188.35	-399.77	-1588.12
TCGA-85-8072-01	-739.94	350.33	-389.61
TCGA-85-8276-01	816.27	1164.1	1980.37
TCGA-85-8277-01	-839.79	80.91	-758.89
TCGA-85-8287-01	984.73	1400.82	2385.55
TCGA-85-8288-01	361.34	367.51	728.84
TCGA-85-8350-01	29.03	349.41	378.45
TCGA-85-8351-01	-663.36	5.72	-657.64
TCGA-85-8352-01	-1966.62	-1046.75	-3013.37
TCGA-85-8353-01	719.05	779.99	1499.04
TCGA-85-8354-01	-1494.57	-550.06	-2044.63
TCGA-85-8355-01	283.6	2293.27	2576.87
TCGA-85-8479-01	-1257.83	-714.66	-1972.49
TCGA-85-8481-01	350.33	637.94	988.27
TCGA-85-8580-01	-1345.1	101.51	-1243.59
TCGA-85-8582-01	951.44	545.72	1497.16
TCGA-85-8584-01	-305.83	1317.06	1011.23
TCGA-85-8664-01	-1921.34	-713.99	-2635.33
TCGA-85-8666-01	380.39	687.9	1068.29
TCGA-85-A4CL-01	-334.82	1042.6	707.78
TCGA-85-A4CN-01	155.04	4.09	159.13
TCGA-85-A4JB-01	-569.89	-252.82	-822.71
TCGA-85-A4JC-01	25.32	673.93	699.24
TCGA-85-A4PA-01	83.94	3198.31	3282.25
TCGA-85-A4QQ-01	-1301.7	-225.38	-1527.08
TCGA-85-A4QR-01	-2276.75	-1112.59	-3389.34
TCGA-85-A50M-01	-143.39	17.37	-126.03
TCGA-85-A50Z-01	-1015.42	603.41	-412.01
TCGA-85-A510-01	-549.95	580.28	30.33
TCGA-85-A511-01	532.15	662.69	1194.83
TCGA-85-A512-01	-648.19	-223.89	-872.08
TCGA-85-A513-01	691.85	2062.97	2754.82
TCGA-85-A53L-01	-868.59	-298.19	-1166.78
TCGA-85-A5B5-01	-763.35	-587.86	-1351.21
TCGA-90-6837-01	776.06	1274.74	2050.8
TCGA-90-7766-01	-977.52	936.22	-41.29
TCGA-90-7767-01	577.01	1022.12	1599.13
TCGA-90-7769-01	-1276.14	-711.97	-1988.1
TCGA-90-7964-01	-142.99	489.59	346.61
TCGA-90-A4ED-01	-99.08	8.39	-90.7
TCGA-90-A4EE-01	593.74	2286.43	2880.17
TCGA-90-A59Q-01	222.51	1940.05	2162.56
TCGA-92-7340-01	1095.41	879.36	1974.77
TCGA-92-7341-01	31.81	-81.77	-49.96
TCGA-92-8063-01	-221.54	92	-129.54
TCGA-92-8064-01	569.74	1735.21	2304.95
TCGA-92-8065-01	-198.42	1106.67	908.25
TCGA-94-7033-01	-1702.84	-225.49	-1928.33
TCGA-94-7557-01	-383.16	146.09	-237.07
TCGA-94-7943-01	-853.87	97.4	-756.48
TCGA-94-8035-01	-1330.46	-405.22	-1735.68
TCGA-94-8490-01	-1466.18	-809.69	-2275.87
TCGA-94-8491-01	-882.85	726.54	-156.31
TCGA-94-A4VJ-01	-452.92	201.94	-250.98
TCGA-94-A5I4-01	-1068.2	-354.5	-1422.69
TCGA-94-A5I6-01	-633.44	-420.76	-1054.2
TCGA-96-7544-01	848.11	802.32	1650.43
TCGA-96-7545-01	327.42	1071.58	1399
TCGA-96-8169-01	-137.82	581.98	444.16
TCGA-96-8170-01	-283.48	603.12	319.64
TCGA-96-A4JK-01	-517.26	261.98	-255.29
TCGA-96-A4JL-01	311.45	2021.36	2332.82
TCGA-98-7454-01	1544.15	2019.74	3563.9
TCGA-98-8020-01	312.64	715.08	1027.72
TCGA-98-8021-01	-126.69	-172.5	-299.19
TCGA-98-8022-01	-112.76	882.04	769.28
TCGA-98-8023-01	593.15	1338.81	1931.97
TCGA-98-A538-01	-428.95	196.19	-232.76
TCGA-98-A539-01	-396.71	237.9	-158.81
TCGA-98-A53A-01	-1287.46	-489.57	-1777.04
TCGA-98-A53B-01	-456.96	474.31	17.35
TCGA-98-A53C-01	1294.97	2350.47	3645.44
TCGA-98-A53D-01	1258.78	1722.76	2981.54
TCGA-98-A53H-01	1051.79	1719.85	2771.64
TCGA-98-A53I-01	-211.16	1089.69	878.53
TCGA-98-A53J-01	-1264.92	-392.24	-1657.16
TCGA-J1-A4AH-01	-1241.99	-572.61	-1814.6
TCGA-L3-A4E7-01	-512.11	544.17	32.06
TCGA-L3-A524-01	-698.1	-621.87	-1319.97
TCGA-LA-A446-01	-1352.6	-244.08	-1596.69
TCGA-LA-A7SW-01	-771.29	-224.3	-995.6
TCGA-MF-A522-01	-1554.33	-562.65	-2116.98
TCGA-NC-A5HD-01	-1405.83	-1055.5	-2461.32
TCGA-NC-A5HE-01	146.63	2396.54	2543.17
TCGA-NC-A5HF-01	-1536.82	-960.57	-2497.39
TCGA-NC-A5HG-01	-1624.35	-576.91	-2201.25
TCGA-NC-A5HH-01	-1285.66	-573.63	-1859.3
TCGA-NC-A5HI-01	-1578.69	-257.32	-1836.01
TCGA-NC-A5HJ-01	28.34	1794.12	1822.46
TCGA-NC-A5HK-01	-1431.45	-119.52	-1550.98
TCGA-NC-A5HL-01	-779.99	862.69	82.7
TCGA-NC-A5HM-01	-1440.34	107.02	-1333.32
TCGA-NC-A5HN-01	-1489.94	-631.25	-2121.19
TCGA-NC-A5HO-01	-1173.61	32.97	-1140.64
TCGA-NC-A5HP-01	19.96	-521.42	-501.46
TCGA-NC-A5HQ-01	-1061.8	592.34	-469.47
TCGA-NC-A5HR-01	-1416.58	-426.78	-1843.36
TCGA-NC-A5HT-01	-1211.32	-1296.87	-2508.2
TCGA-NK-A5CR-01	-1431.45	-845.58	-2277.03
TCGA-NK-A5CT-01	-1418.92	94.02	-1324.89
TCGA-NK-A5CX-01	-40.02	679.93	639.91
TCGA-NK-A5D1-01	-1410.6	-814.07	-2224.67
TCGA-NK-A7XE-01	-1626.26	-125.7	-1751.95
TCGA-O2-A52N-01	-631.48	389.52	-241.97
TCGA-O2-A52Q-01	90.71	1761.92	1852.63
TCGA-O2-A52S-01	-976.44	420.45	-555.99
TCGA-O2-A52V-01	-340.22	450.54	110.32
TCGA-O2-A52W-01	-1363.11	-169.73	-1532.85
TCGA-O2-A5IB-01	-1568.43	-1311.72	-2880.15
TCGA-XC-AA0X-01	-139.32	1098.81	959.49
