# Supplementary material for: Identification of prognosis value and immune microenvironment features of ceRNAs in NSCLC with distinct gene mutation
Source: Aging (Albany NY). 2023 Jun 26;15(12):5873–86. doi: 10.18632/aging.204846 (PMC10333077; doi:10.18632/aging.204846)
Supplement: Supplementary Table 5 [file aging-15-204846-s005.xlsx]

## Sheet: LUAD
Supplementary Table 5. The estimation of 24 immune cell abundance in LUAD and LUSC by ImmuneCellAI web tools.
sample	CD4_naive	CD8_naive	Tc	Tex	Tr1	nTreg	iTreg	Th1	Th2	Th17	Tfh	Tcm	Tem	NKT	MAIT	DC	B_cell	Monocyte	Macrophage	NK	Neutrophil	Tgd	CD4_T	CD8_T	InfiltrationScore
TCGA.05.4244.01A.01R.1107.07	0	0.074	0.213	0.061	0.097	0.099	0.307	0.109	0.018	0.112	0.307	0.081	0.031	0.067	0.08	0.242	0.068	0.144	0.279	0.291	0.159	0.049	0.236	0.146	0.783
TCGA.05.4249.01A.01R.1107.07	0	0.093	0.099	0.068	0.155	0.115	0.289	0.066	0.111	0.184	0.25	0.073	0.016	0.009	0.089	0.239	0.129	0.153	0.262	0.203	0.141	0.066	0.183	0.176	0.742
TCGA.05.4250.01A.01R.1107.07	0	0.036	0.29	0.149	0.041	0.126	0.24	0.183	0.006	0.151	0.378	0.121	0.006	0.043	0.085	0.21	0.083	0.136	0.265	0.256	0.084	0.115	0.107	0.185	0.663
TCGA.05.4382.01A.01R.1206.07	0	0.003	0.164	0.1	0.111	0.105	0.317	0.135	0.044	0.102	0.288	0.061	0.023	0.113	0.15	0.241	0.095	0.189	0.361	0.347	0.121	0.048	0.145	0.204	0.852
TCGA.05.4384.01A.01R.1755.07	0	0.022	0.177	0.042	0.08	0.132	0.248	0.04	0.068	0.211	0.335	0.094	0	0.122	0.115	0.194	0.076	0.138	0.288	0.376	0.16	0.032	0.214	0.14	0.793
TCGA.05.4389.01A.01R.1206.07	0	0.03	0.206	0.101	0.092	0.121	0.294	0.216	0.1	0.142	0.36	0.1	0.039	0.027	0.106	0.288	0.128	0.11	0.245	0.358	0.118	0.085	0.114	0.237	0.799
TCGA.05.4390.01A.02R.1755.07	0	0.054	0.09	0.06	0.127	0.216	0.26	0.063	0.033	0.194	0.131	0.076	0.041	0.068	0.019	0.231	0.101	0.198	0.274	0.104	0.18	0.064	0.104	0.199	0.696
TCGA.05.4395.01A.01R.1206.07	0	0	0.199	0.065	0.036	0.168	0.365	0.139	0.105	0.178	0.343	0.053	0.049	0.02	0.127	0.2	0.066	0.209	0.249	0.363	0.126	0.076	0.055	0.193	0.731
TCGA.05.4396.01A.21R.1858.07	0	0.086	0.149	0.061	0.108	0.166	0.289	0.128	0.065	0.202	0.301	0.123	0.013	0.026	0.116	0.131	0.107	0.09	0.126	0.272	0.147	0.015	0.163	0.141	0.589
TCGA.05.4397.01A.01R.1206.07	0	0.041	0.145	0.078	0.1	0.14	0.27	0.07	0.104	0.146	0.241	0.061	0.03	0	0.049	0.233	0.168	0.134	0.317	0.229	0.145	0.072	0.088	0.184	0.75
TCGA.05.4398.01A.01R.1206.07	0	0.022	0.194	0.116	0.095	0.169	0.278	0.188	0.084	0.159	0.304	0.064	0.026	0.073	0.074	0.2	0.105	0.154	0.311	0.284	0.123	0.052	0.199	0.21	0.794
TCGA.05.4402.01A.01R.1206.07	0	0.061	0.109	0.055	0.117	0.107	0.247	0.068	0.12	0.196	0.236	0.092	0.01	0.098	0.116	0.206	0.118	0.17	0.332	0.22	0.129	0.038	0.143	0.199	0.759
TCGA.05.4403.01A.01R.1206.07	0	0.013	0.168	0.044	0.075	0.116	0.254	0.079	0.139	0.175	0.346	0.111	0.03	0.089	0.13	0.273	0.077	0.148	0.359	0.332	0.124	0.016	0.1	0.185	0.8
TCGA.05.4405.01A.21R.1858.07	0	0.054	0.14	0.052	0.102	0.086	0.241	0.033	0.077	0.177	0.296	0.103	0.021	0.095	0.066	0.172	0.122	0.142	0.295	0.219	0.139	0.057	0.206	0.164	0.729
TCGA.05.4410.01A.21R.1858.07	0	0.039	0.225	0.135	0.129	0.067	0.285	0.2	0.063	0.141	0.362	0.107	0.038	0.028	0.03	0.127	0.148	0.153	0.233	0.325	0.102	0.068	0.2	0.221	0.755
TCGA.05.4415.01A.22R.1858.07	0	0.063	0.23	0.113	0.081	0.187	0.388	0.279	0.051	0.079	0.154	0.017	0.039	0	0.097	0.181	0.034	0.147	0.257	0.301	0.188	0.052	0.057	0.179	0.673
TCGA.05.4417.01A.22R.1858.07	0	0.065	0.196	0.101	0.13	0.164	0.311	0.136	0.068	0.163	0.364	0.137	0	0.024	0.157	0.241	0.086	0.12	0.239	0.3	0.097	0.03	0.196	0.227	0.754
TCGA.05.4418.01A.01R.1206.07	0	0.008	0.187	0.106	0.12	0.16	0.312	0.187	0.061	0.153	0.39	0.116	0.057	0	0.126	0.206	0.095	0.118	0.244	0.291	0.114	0.037	0.14	0.248	0.729
TCGA.05.4420.01A.01R.1206.07	0	0.031	0.132	0.062	0.113	0.205	0.196	0.02	0.012	0.198	0.156	0.063	0.031	0.123	0.083	0.153	0.114	0.149	0.254	0.246	0.241	0.014	0.114	0.165	0.718
TCGA.05.4422.01A.01R.1206.07	0	0.034	0.198	0.11	0.101	0.092	0.291	0.222	0.078	0.152	0.392	0.113	0.039	0	0.121	0.126	0.133	0.064	0.205	0.329	0.075	0.072	0.197	0.248	0.689
TCGA.05.4424.01A.22R.1858.07	0	0.082	0.131	0.054	0.109	0.107	0.288	0.055	0.098	0.149	0.371	0.109	0	0.102	0.101	0.17	0.138	0.148	0.33	0.268	0.15	0.031	0.123	0.177	0.753
TCGA.05.4425.01A.01R.1755.07	0	0.058	0.159	0.088	0.101	0.076	0.297	0.185	0.141	0.149	0.342	0.116	0.071	0	0.139	0.28	0.053	0.088	0.273	0.338	0.082	0.051	0.177	0.174	0.733
TCGA.05.4426.01A.01R.1206.07	0.001	0.079	0.142	0.072	0.105	0.105	0.256	0.146	0.145	0.19	0.263	0.024	0.047	0.012	0.102	0.205	0.067	0.224	0.271	0.283	0.156	0.01	0.212	0.17	0.794
TCGA.05.4427.01A.21R.1858.07	0	0.048	0.215	0.087	0.087	0.163	0.298	0.155	0	0.15	0.277	0.098	0.045	0.046	0.048	0.217	0.075	0.189	0.287	0.239	0.149	0.059	0.192	0.155	0.752
TCGA.05.4430.01A.02R.1206.07	0	0.064	0.149	0.08	0.086	0.116	0.273	0.063	0.101	0.132	0.316	0.094	0.004	0.138	0.105	0.246	0.092	0.129	0.289	0.294	0.134	0.087	0.155	0.221	0.781
TCGA.05.4432.01A.01R.1206.07	0	0.053	0.183	0.1	0.092	0.143	0.28	0.166	0.064	0.17	0.339	0.092	0.024	0.098	0.08	0.193	0.116	0.119	0.216	0.328	0.113	0.046	0.15	0.211	0.724
TCGA.05.4433.01A.22R.1858.07	0	0.048	0.194	0.078	0.091	0.094	0.288	0.119	0.063	0.153	0.374	0.094	0.04	0.045	0.123	0.22	0.093	0.177	0.337	0.307	0.124	0.03	0.174	0.161	0.796
TCGA.05.4434.01A.01R.1206.07	0	0.044	0.166	0.114	0.09	0.1	0.302	0.191	0.108	0.08	0.364	0.107	0.013	0.105	0.098	0.242	0.123	0.115	0.301	0.342	0.105	0.037	0.207	0.201	0.818
TCGA.05.5420.01A.01R.1628.07	0	0	0.24	0.113	0.177	0.128	0.324	0.21	0.067	0.039	0.379	0.091	0.042	0.069	0.136	0.253	0.13	0.149	0.359	0.363	0.086	0.072	0.1	0.242	0.841
TCGA.05.5423.01A.01R.1628.07	0	0.075	0.139	0.077	0.143	0.133	0.258	0.041	0.033	0.113	0.419	0.083	0.021	0.057	0.118	0.319	0.135	0.077	0.328	0.252	0.125	0.085	0.166	0.243	0.823
TCGA.05.5425.01A.02R.1628.07	0	0.045	0.219	0.121	0.112	0.104	0.326	0.181	0.058	0.132	0.398	0.093	0.024	0.044	0.082	0.224	0.094	0.138	0.29	0.359	0.112	0.082	0.127	0.221	0.782
TCGA.05.5428.01A.01R.1628.07	0	0.038	0.083	0.097	0.1	0.089	0.251	0.094	0.036	0.12	0.203	0.049	0.118	0.062	0.087	0.258	0.091	0.136	0.357	0.206	0.168	0.049	0.098	0.174	0.744
TCGA.05.5429.01A.01R.1628.07	0	0.08	0.156	0.014	0.083	0.115	0.155	0.047	0.186	0.216	0.32	0.129	0.086	0.064	0.123	0.14	0.089	0.087	0.145	0.207	0.117	0	0.16	0.142	0.543
TCGA.05.5715.01A.01R.1628.07	0	0.065	0.104	0.102	0.101	0.079	0.159	0.049	0.105	0.153	0.169	0.122	0	0.075	0.139	0.301	0.12	0.198	0.391	0.196	0.171	0.023	0.102	0.135	0.807
TCGA.35.3615.01A.01R.0946.07	0	0.042	0.096	0.112	0.083	0.131	0.254	0.17	0.093	0.204	0.289	0.064	0.101	0.02	0.111	0.251	0.106	0.12	0.259	0.288	0.121	0.054	0.124	0.199	0.734
TCGA.35.4122.01A.01R.1107.07	0	0	0.262	0.115	0.066	0.127	0.268	0.208	0.115	0.07	0.383	0.074	0.014	0.117	0.155	0.273	0.109	0.117	0.388	0.345	0.069	0.076	0.068	0.24	0.805
TCGA.35.4123.01A.01R.1107.07	0	0.045	0.241	0.146	0.061	0.093	0.307	0.208	0.091	0.091	0.406	0.088	0.039	0.038	0.093	0.206	0.073	0.112	0.289	0.346	0.055	0.128	0.134	0.253	0.734
TCGA.35.5375.01A.01R.1628.07	0	0	0.18	0.094	0.058	0.121	0.238	0.231	0.136	0.016	0.365	0.058	0.084	0.108	0.139	0.14	0.1	0.106	0.216	0.454	0.094	0.086	0.115	0.277	0.751
TCGA.38.4625.01A.01R.1206.07	0	0.025	0.227	0.097	0.063	0.131	0.262	0.178	0.071	0.112	0.298	0.114	0.062	0.085	0.066	0.206	0.109	0.118	0.33	0.258	0.139	0.036	0.089	0.184	0.717
TCGA.38.4625.11A.01R.1758.07	0	0	0.136	0.044	0	0.002	0.13	0.026	0.131	0.137	0.394	0.053	0.02	0.267	0.152	0.213	0.057	0.133	0.362	0.388	0.219	0.105	0.107	0.186	0.833
TCGA.38.4626.01A.01R.1206.07	0	0.074	0.203	0.05	0.089	0.074	0.328	0.023	0.064	0.162	0.274	0.036	0.001	0.118	0.135	0.292	0.035	0.201	0.429	0.303	0.167	0.035	0.165	0.101	0.846
TCGA.38.4626.11A.01R.1758.07	0	0.029	0.204	0.07	0.031	0.034	0.212	0.066	0.122	0.117	0.339	0	0.02	0.159	0.179	0.247	0.05	0.154	0.423	0.432	0.193	0.08	0.088	0.162	0.875
TCGA.38.4627.01A.01R.1206.07	0	0.043	0.136	0.057	0.083	0.058	0.245	0.05	0.19	0.118	0.311	0.13	0.02	0.151	0.142	0.202	0.089	0.183	0.329	0.313	0.093	0.052	0.208	0.145	0.782
TCGA.38.4627.11A.01R.1758.07	0	0.008	0.228	0.061	0.026	0.049	0.131	0.076	0.167	0.093	0.423	0.069	0	0.231	0.198	0.209	0.068	0.135	0.338	0.428	0.145	0.152	0.101	0.211	0.818
TCGA.38.4628.01A.01R.1206.07	0	0.06	0.037	0.127	0.129	0.03	0.107	0.021	0.143	0.187	0.096	0.03	0.005	0.142	0.107	0.304	0.113	0.217	0.344	0.168	0.204	0	0.055	0.138	0.772
TCGA.38.4629.01A.02R.1206.07	0	0	0.225	0.135	0.07	0.101	0.291	0.228	0.115	0.046	0.309	0.1	0.018	0.093	0.137	0.229	0.1	0.159	0.362	0.328	0.107	0.073	0.068	0.183	0.767
TCGA.38.4630.01A.01R.1206.07	0	0.117	0.15	0.012	0.086	0.117	0.284	0.113	0.197	0.158	0.242	0.093	0.052	0.015	0	0.198	0.138	0.145	0.204	0.226	0.132	0.06	0.185	0.165	0.698
TCGA.38.4631.01A.01R.1755.07	0	0.024	0.149	0.096	0.09	0.162	0.239	0.09	0.087	0.09	0.334	0.111	0.107	0	0.133	0.136	0.104	0.107	0.197	0.316	0.197	0.058	0.101	0.214	0.686
TCGA.38.4632.01A.01R.1755.07	0	0	0.187	0.142	0.093	0.192	0.298	0.159	0.092	0.131	0.325	0.078	0.051	0.017	0.083	0.277	0.086	0.138	0.323	0.304	0.096	0.059	0.122	0.207	0.777
TCGA.38.4632.11A.01R.1755.07	0	0.024	0.303	0.061	0.061	0.051	0.285	0.127	0.096	0.152	0.353	0.031	0	0.097	0.195	0.314	0.068	0.121	0.411	0.36	0.145	0.11	0.087	0.172	0.839
TCGA.38.6178.01A.11R.1755.07	0	0.077	0.119	0.065	0.115	0.08	0.278	0.092	0.126	0.161	0.327	0.116	0.003	0.062	0.064	0.132	0.11	0.153	0.17	0.221	0.133	0.07	0.184	0.169	0.636
TCGA.38.7271.01A.11R.2039.07	0	0.048	0.209	0.079	0.154	0.115	0.313	0.061	0.099	0.114	0.491	0.121	0	0.086	0.095	0.14	0.204	0	0.188	0.356	0.036	0.111	0.17	0.308	0.701
TCGA.38.A44F.01A.11R.A24H.07	0	0.052	0.208	0.094	0.076	0.045	0.241	0.176	0.1	0.135	0.411	0.09	0.033	0.085	0.131	0.182	0.129	0.119	0.225	0.373	0.063	0.051	0.256	0.23	0.788
TCGA.44.2655.01A.01R.0946.07	0	0.062	0.101	0.067	0.072	0.091	0.232	0.056	0.154	0.168	0.41	0.118	0.037	0.058	0.161	0.199	0.161	0.083	0.168	0.364	0.095	0.044	0.183	0.177	0.716
TCGA.44.2655.11A.01R.1758.07	0	0.022	0.166	0.046	0.059	0.005	0.151	0.074	0.144	0.146	0.371	0.05	0.021	0.224	0.155	0.112	0.093	0.153	0.255	0.383	0.228	0.073	0.188	0.135	0.773
TCGA.44.2656.01A.02R.0946.07	0	0.039	0.244	0.127	0.096	0.104	0.318	0.203	0.083	0.045	0.385	0.131	0.018	0.028	0.091	0.184	0.105	0.073	0.285	0.327	0.092	0.091	0.182	0.25	0.749
TCGA.44.2657.01A.01R.1107.07	0	0.041	0.219	0.144	0.153	0.046	0.266	0.173	0.092	0.116	0.414	0.111	0.003	0.045	0.076	0.166	0.24	0.021	0.213	0.358	0.022	0.103	0.224	0.255	0.75
TCGA.44.2657.11A.01R.1758.07	0	0.026	0.183	0.112	0.114	0.036	0.299	0.117	0.081	0.106	0.47	0.068	0.004	0.115	0.127	0.164	0.266	0.047	0.237	0.343	0.091	0.099	0.188	0.24	0.789
TCGA.44.2659.01A.01R.0946.07	0	0.093	0.163	0.066	0.132	0.12	0.271	0.146	0.113	0.126	0.37	0.119	0.032	0.02	0.101	0.16	0.108	0.074	0.208	0.327	0.084	0.089	0.193	0.298	0.726
TCGA.44.2661.01A.01R.1107.07	0	0.036	0.174	0.113	0.149	0.087	0.283	0.155	0.101	0.127	0.383	0.078	0.02	0.08	0.14	0.249	0.157	0.103	0.304	0.309	0.094	0.072	0.205	0.246	0.834
TCGA.44.2661.11A.01R.1758.07	0	0.03	0.185	0.06	0.079	0.021	0.256	0.134	0.135	0.144	0.398	0.066	0.02	0.166	0.123	0.215	0.105	0.147	0.316	0.351	0.187	0.07	0.179	0.163	0.832
TCGA.44.2662.01A.01R.0946.07	0	0.036	0.165	0.067	0.104	0.115	0.295	0.058	0	0.167	0.257	0.065	0.022	0.121	0.084	0.2	0.167	0.311	0.411	0.185	0.185	0	0.132	0.097	0.845
TCGA.44.2662.11A.01R.1758.07	0	0.011	0.246	0.046	0.044	0.034	0.229	0.027	0.132	0.139	0.456	0.031	0	0.182	0.148	0.122	0.059	0.143	0.304	0.465	0.246	0.103	0.165	0.135	0.82
TCGA.44.2665.01A.01R.0946.07	0	0.105	0.081	0.069	0.123	0.101	0.304	0	0.122	0.137	0.249	0.097	0.013	0.124	0.114	0.284	0.072	0.201	0.276	0.214	0.137	0	0.229	0.101	0.757
TCGA.44.2665.11A.01R.1758.07	0	0.049	0.146	0.039	0.083	0	0.196	0.031	0.138	0.163	0.368	0.062	0	0.209	0.157	0.169	0.05	0.197	0.326	0.346	0.202	0.05	0.171	0.13	0.796
TCGA.44.2666.01A.01R.0946.07	0	0.089	0.141	0.036	0.077	0.064	0.215	0.047	0.098	0.192	0.296	0.081	0.046	0.119	0.107	0.182	0.113	0.135	0.161	0.298	0.168	0.045	0.16	0.163	0.69
TCGA.44.2668.01A.01R.0946.07	0	0.035	0.227	0.123	0.065	0.119	0.361	0.193	0.128	0.165	0.292	0.096	0.004	0.062	0.061	0.233	0.088	0.195	0.284	0.362	0.174	0.025	0.12	0.16	0.808
TCGA.44.2668.11A.01R.1758.07	0	0	0.175	0.093	0.052	0.045	0.232	0.058	0.096	0.168	0.321	0	0	0.183	0.152	0.258	0.028	0.207	0.416	0.393	0.237	0.04	0.109	0.115	0.882
TCGA.44.3396.01A.01R.1206.07	0	0.047	0.183	0.086	0.136	0.112	0.317	0.096	0.083	0.128	0.378	0.129	0	0.059	0.074	0.186	0.112	0.173	0.29	0.305	0.123	0.071	0.207	0.195	0.796
TCGA.44.3396.11A.01R.1758.07	0	0.036	0.237	0.057	0.081	0.014	0.274	0.076	0.117	0.119	0.415	0.069	0	0.182	0.132	0.162	0.054	0.139	0.307	0.391	0.179	0.087	0.2	0.175	0.804
TCGA.44.3398.01A.01R.1107.07	0	0.072	0.231	0.085	0.103	0.129	0.272	0.038	0.13	0.1	0.303	0.101	0.037	0.097	0.168	0.341	0.097	0.151	0.294	0.377	0.088	0.049	0.157	0.177	0.841
TCGA.44.3398.11B.01R.1758.07	0	0.025	0.259	0.062	0.054	0.029	0.219	0.127	0.117	0.135	0.397	0.062	0.007	0.187	0.15	0.163	0.054	0.115	0.286	0.388	0.166	0.104	0.195	0.205	0.786
TCGA.44.3918.01A.01R.1107.07	0	0	0.24	0.144	0.078	0.107	0.336	0.201	0.074	0.062	0.37	0.117	0.008	0.08	0.177	0.203	0.098	0.091	0.285	0.329	0.077	0.073	0.172	0.252	0.754
TCGA.44.3919.01A.02R.1107.07	0	0.055	0.177	0.088	0.096	0.123	0.312	0.158	0.123	0.119	0.351	0.111	0.021	0.094	0.085	0.203	0.124	0.102	0.248	0.329	0.097	0.038	0.207	0.236	0.774
TCGA.44.4112.01A.01R.1107.07	0	0.011	0.161	0.058	0.109	0.115	0.265	0.029	0.032	0.168	0.357	0.124	0.05	0.089	0.107	0.209	0.111	0.153	0.269	0.177	0.14	0.051	0.189	0.165	0.707
TCGA.44.5643.01A.01R.1628.07	0	0.043	0.204	0.059	0.106	0.123	0.363	0.168	0.067	0.066	0.399	0.082	0.046	0.027	0.055	0.189	0.117	0.097	0.131	0.23	0.148	0.096	0.162	0.239	0.657
TCGA.44.5644.01A.21R.2039.07	0	0.132	0.115	0.036	0.014	0.145	0.273	0.053	0.17	0.168	0.265	0.034	0.058	0.005	0.102	0.1	0.124	0.11	0.082	0.238	0.216	0.047	0.13	0.169	0.585
TCGA.44.5645.01A.01R.1628.07	0	0.09	0.11	0.037	0.145	0.092	0.344	0.057	0.113	0.116	0.393	0.11	0	0.077	0.132	0.198	0.162	0.1	0.208	0.254	0.097	0.038	0.251	0.24	0.755
TCGA.44.5645.11A.01R.1628.07	0	0.016	0.244	0.018	0.049	0	0.188	0.053	0.137	0.155	0.371	0.056	0	0.211	0.169	0.165	0.081	0.124	0.292	0.394	0.186	0.099	0.196	0.194	0.817
TCGA.44.6144.11A.01R.1755.07	0	0	0.269	0.049	0.03	0.012	0.188	0.133	0.121	0.153	0.377	0.04	0.018	0.184	0.167	0.256	0.069	0.136	0.332	0.389	0.158	0.109	0.169	0.164	0.836
TCGA.44.6145.01A.11R.1755.07	0	0	0.239	0.148	0.091	0.156	0.339	0.172	0.084	0.159	0.399	0.124	0	0.049	0.085	0.147	0.134	0.151	0.213	0.368	0.11	0.046	0.15	0.276	0.775
TCGA.44.6145.11A.01R.1858.07	0	0.01	0.248	0.021	0.052	0.031	0.226	0.045	0.133	0.164	0.403	0.02	0	0.182	0.152	0.155	0.048	0.159	0.293	0.432	0.209	0.111	0.174	0.145	0.808
TCGA.44.6146.01A.11R.1755.07	0	0.055	0.111	0.01	0.02	0.126	0.24	0.027	0.138	0.266	0.291	0.104	0.063	0.023	0.153	0.083	0.092	0.12	0.081	0.27	0.171	0.021	0.188	0.147	0.577
TCGA.44.6146.11A.01R.1858.07	0	0.021	0.24	0.076	0.063	0.013	0.234	0.105	0.112	0.144	0.427	0.08	0.006	0.136	0.129	0.149	0.071	0.125	0.262	0.39	0.168	0.125	0.184	0.187	0.768
TCGA.44.6147.01A.11R.1755.07	0	0.083	0.144	0.019	0.14	0.06	0.279	0.065	0.117	0.145	0.411	0.159	0	0.069	0.096	0.094	0.154	0.1	0.157	0.229	0.105	0.084	0.262	0.198	0.649
TCGA.44.6147.11A.01R.1858.07	0	0.037	0.242	0.027	0	0.039	0.214	0.028	0.158	0.189	0.422	0.036	0	0.148	0.16	0.135	0	0.162	0.265	0.445	0.254	0.083	0.135	0.16	0.778
TCGA.44.6148.01A.11R.1755.07	0	0.072	0.117	0.063	0.08	0.079	0.231	0.034	0.086	0.163	0.378	0.069	0.008	0.078	0.183	0.124	0.097	0.105	0.192	0.264	0.146	0.08	0.267	0.195	0.695
TCGA.44.6148.11A.01R.1858.07	0	0.021	0.198	0.016	0.033	0.01	0.248	0.094	0.119	0.158	0.415	0.08	0.004	0.182	0.165	0.095	0.096	0.137	0.23	0.351	0.203	0.09	0.228	0.156	0.748
TCGA.44.6774.01A.21R.1858.07	0	0.082	0.124	0.099	0.12	0.132	0.356	0.049	0.12	0.116	0.242	0.102	0	0.056	0.057	0.194	0.072	0.181	0.287	0.249	0.13	0.034	0.221	0.147	0.74
TCGA.44.6775.01A.11R.1858.07	0	0.117	0.156	0.068	0.155	0.127	0.316	0.039	0.113	0.142	0.208	0.099	0	0.065	0.072	0.306	0.152	0.203	0.331	0.223	0.114	0.02	0.169	0.142	0.821
TCGA.44.6776.01A.11R.1858.07	0.013	0.088	0.146	0.051	0.064	0.08	0.208	0.052	0.072	0.229	0.31	0.095	0.001	0.079	0.162	0.181	0.079	0.123	0.062	0.221	0.159	0.057	0.161	0.165	0.575
TCGA.44.6776.11A.01R.1858.07	0.001	0.003	0.233	0.02	0	0.002	0.183	0.041	0.134	0.169	0.396	0.021	0.017	0.191	0.175	0.16	0.042	0.146	0.238	0.454	0.183	0.107	0.176	0.14	0.77
TCGA.44.6777.01A.11R.1858.07	0	0.053	0.197	0.078	0.122	0.106	0.326	0.055	0.028	0.097	0.303	0.102	0	0.139	0.111	0.274	0.121	0.17	0.387	0.267	0.105	0.048	0.184	0.177	0.843
TCGA.44.6777.11A.01R.1858.07	0	0	0.235	0.078	0.055	0.011	0.237	0.106	0.106	0.152	0.404	0.057	0.013	0.184	0.142	0.174	0.106	0.129	0.305	0.374	0.154	0.119	0.156	0.21	0.804
TCGA.44.6778.01A.11R.1858.07	0	0.014	0.213	0.119	0.143	0.086	0.334	0.178	0.074	0.055	0.404	0.118	0.006	0.12	0.087	0.221	0.123	0.058	0.31	0.372	0.097	0.062	0.189	0.208	0.789
TCGA.44.6778.11A.01R.1858.07	0	0.019	0.216	0.08	0.07	0.028	0.241	0.132	0.105	0.114	0.452	0.074	0.014	0.141	0.124	0.134	0.033	0.12	0.282	0.436	0.213	0.083	0.213	0.138	0.785
TCGA.44.6779.01A.11R.1858.07	0	0.041	0.252	0.113	0.066	0.138	0.371	0.195	0.066	0.098	0.404	0.114	0	0	0.072	0.172	0.103	0.175	0.296	0.36	0.098	0.077	0.078	0.236	0.759
TCGA.44.7659.01A.11R.2066.07	0	0.079	0.156	0.054	0.096	0.064	0.245	0.068	0.059	0.186	0.359	0.089	0.018	0.089	0.028	0.192	0.129	0.114	0.209	0.257	0.115	0.126	0.237	0.209	0.731
TCGA.44.7660.01A.11R.2066.07	0	0.045	0.201	0.053	0.068	0.088	0.291	0.135	0.146	0.101	0.272	0.027	0.06	0.115	0.07	0.143	0.125	0.151	0.246	0.272	0.149	0.105	0.145	0.177	0.704
TCGA.44.7661.01A.11R.2066.07	0	0.062	0.151	0.094	0.114	0.129	0.334	0.149	0.099	0.083	0.297	0.122	0.03	0.136	0.074	0.248	0.094	0.178	0.267	0.273	0.11	0.046	0.206	0.16	0.768
TCGA.44.7662.01A.11R.2066.07	0	0.068	0.225	0.125	0.088	0.091	0.32	0.2	0.076	0.111	0.31	0.082	0.042	0.025	0.072	0.207	0.073	0.182	0.277	0.312	0.116	0.07	0.147	0.187	0.751
TCGA.44.7667.01A.31R.2066.07	0	0	0.149	0.127	0.07	0.187	0.213	0.18	0	0.091	0.185	0.099	0.077	0	0.11	0.241	0.074	0.161	0.287	0.225	0.194	0.062	0.077	0.253	0.756
TCGA.44.7669.01A.21R.2066.07	0	0.075	0.173	0.037	0.106	0.139	0.393	0.095	0.082	0.07	0.309	0.109	0.007	0.092	0.075	0.227	0.098	0.153	0.269	0.303	0.134	0.042	0.175	0.171	0.765
TCGA.44.7670.01A.11R.2066.07	0	0.103	0.153	0.115	0.044	0.145	0.224	0.1	0.194	0.129	0.293	0.062	0.005	0	0.081	0.167	0.154	0.138	0.121	0.407	0.161	0.054	0.092	0.192	0.716
TCGA.44.7671.01A.11R.2066.07	0	0.059	0.119	0.075	0.12	0.105	0.188	0.026	0.056	0.232	0.176	0.091	0.028	0.083	0.079	0.22	0.093	0.144	0.189	0.216	0.157	0.035	0.157	0.11	0.643
TCGA.44.7672.01A.11R.2066.07	0	0.069	0.217	0.135	0.139	0.128	0.281	0.188	0.069	0.09	0.355	0.124	0	0.075	0.081	0.22	0.136	0.129	0.272	0.333	0.076	0.055	0.169	0.242	0.789
TCGA.44.8117.01A.11R.2241.07	0	0.076	0.115	0.107	0.101	0.1	0.278	0.159	0.135	0.112	0.298	0.072	0.045	0.059	0.038	0.181	0.105	0.14	0.221	0.281	0.137	0.074	0.148	0.175	0.695
TCGA.44.8119.01A.11R.2241.07	0	0.057	0.212	0.111	0.108	0.212	0.323	0.14	0	0.098	0.334	0.089	0.037	0	0.074	0.199	0.056	0.17	0.24	0.247	0.143	0.062	0.16	0.229	0.722
TCGA.44.8120.01A.11R.2241.07	0	0.074	0.129	0.047	0.1	0.074	0.282	0.035	0.148	0.174	0.369	0.106	0	0.156	0.042	0.198	0.103	0.13	0.183	0.272	0.124	0.064	0.169	0.218	0.699
TCGA.44.A479.01A.31R.A24H.07	0	0.031	0.209	0.13	0.139	0.104	0.331	0.216	0	0.101	0.388	0.15	0.004	0.078	0.114	0.145	0.136	0.129	0.209	0.293	0.061	0.052	0.201	0.221	0.697
TCGA.44.A47A.01A.21R.A24H.07	0	0.107	0.105	0.03	0.127	0.083	0.343	0.108	0.057	0.162	0.315	0.056	0.004	0.095	0.136	0.318	0.092	0.157	0.233	0.174	0.144	0.032	0.225	0.215	0.779
TCGA.44.A47B.01A.11R.A24H.07	0	0.005	0.213	0.085	0.13	0.109	0.332	0.11	0.084	0.187	0.388	0.091	0.007	0	0.084	0.179	0.084	0.12	0.237	0.25	0.103	0.057	0.21	0.187	0.685
TCGA.44.A47G.01A.21R.A24H.07	0	0.064	0.224	0.09	0.11	0.112	0.307	0.155	0.076	0.088	0.407	0.115	0.006	0.072	0.081	0.182	0.102	0.132	0.254	0.344	0.053	0.062	0.251	0.269	0.794
TCGA.44.A4SS.01A.11R.A24X.07	0	0.034	0.249	0.123	0.083	0.087	0.272	0.183	0.093	0.134	0.425	0.133	0.045	0.029	0.086	0.176	0.086	0.167	0.25	0.374	0.096	0.017	0.182	0.231	0.782
TCGA.44.A4SU.01A.11R.A24X.07	0	0.071	0.129	0.073	0.111	0.087	0.256	0.131	0.088	0.132	0.388	0.134	0.028	0.073	0.053	0.103	0.163	0.086	0.066	0.27	0.106	0.07	0.262	0.241	0.649
TCGA.49.4486.01A.01R.1206.07	0	0.068	0.075	0.06	0.009	0.082	0.136	0.076	0.09	0.233	0.364	0.059	0.072	0.069	0.137	0.133	0.117	0.076	0.041	0.211	0.158	0.07	0.152	0.199	0.544
TCGA.49.4487.01A.21R.1858.07	0	0.066	0.237	0.106	0.111	0.084	0.297	0.159	0.079	0.104	0.423	0.132	0	0.08	0.077	0.167	0.206	0.078	0.141	0.297	0.043	0.098	0.209	0.257	0.7
TCGA.49.4488.01A.01R.1755.07	0	0.036	0.192	0.117	0.072	0.15	0.256	0.2	0.035	0.112	0.353	0.08	0.053	0.037	0.088	0.244	0.084	0.044	0.182	0.305	0.115	0.109	0.151	0.224	0.675
TCGA.49.4490.01A.21R.1858.07	0	0.065	0.127	0.05	0.063	0.05	0.157	0.064	0.15	0.161	0.371	0.087	0.038	0.119	0.088	0.112	0.095	0.117	0.171	0.255	0.147	0.071	0.219	0.234	0.675
TCGA.49.4490.11A.01R.1858.07	0	0.009	0.247	0.048	0	0.015	0.125	0.121	0.155	0.13	0.39	0.04	0.045	0.185	0.231	0.179	0.099	0.096	0.268	0.46	0.182	0.153	0.106	0.212	0.802
TCGA.49.4494.01A.01R.1206.07	0	0	0.178	0.122	0.06	0.111	0.155	0.164	0.03	0.145	0.258	0.068	0.051	0.095	0.179	0.227	0.108	0.144	0.274	0.3	0.159	0.099	0.059	0.195	0.734
TCGA.49.4501.01A.01R.1206.07	0	0.055	0.128	0.066	0.077	0.074	0.254	0.093	0.125	0.171	0.453	0.12	0.021	0.056	0.165	0.213	0.126	0.088	0.202	0.306	0.069	0.058	0.197	0.236	0.719
TCGA.49.4505.01A.01R.1206.07	0	0.03	0.189	0.131	0.072	0.116	0.283	0.161	0.079	0.135	0.381	0.093	0.016	0.059	0.083	0.232	0.091	0.064	0.273	0.328	0.109	0.078	0.154	0.246	0.749
TCGA.49.4506.01A.01R.1206.07	0	0	0.237	0.123	0.048	0.146	0.233	0.218	0.045	0.199	0.414	0.109	0.055	0.004	0.179	0.171	0.056	0.139	0.21	0.382	0.106	0.083	0.109	0.258	0.715
TCGA.49.4507.01A.01R.1206.07	0	0	0.278	0.167	0.037	0.136	0.248	0.201	0.149	0.061	0.412	0.06	0.025	0.035	0.126	0.107	0.136	0.162	0.19	0.429	0.075	0.096	0.14	0.303	0.771
TCGA.49.4510.01A.01R.1206.07	0	0.04	0.128	0.044	0.073	0.157	0.214	0.013	0.109	0.192	0.353	0.053	0.018	0.106	0.141	0.172	0.094	0.082	0.185	0.293	0.143	0.059	0.197	0.253	0.709
TCGA.49.4512.01A.21R.1858.07	0	0.136	0.083	0.09	0.096	0.087	0.231	0.016	0.143	0.111	0.222	0.017	0.036	0.101	0.077	0.23	0.135	0.205	0.315	0.246	0.143	0.008	0.246	0.133	0.827
TCGA.49.4512.11A.01R.1858.07	0	0.012	0.22	0.07	0.01	0.028	0.148	0.163	0.145	0.128	0.361	0.058	0.051	0.167	0.184	0.279	0.086	0.126	0.314	0.376	0.146	0.1	0.102	0.247	0.838
TCGA.49.4514.01A.21R.1858.07	0	0.059	0.221	0.152	0.062	0.1	0.242	0.213	0.138	0.116	0.38	0.087	0.025	0	0.143	0.169	0.165	0.143	0.098	0.387	0.108	0.063	0.101	0.232	0.702
TCGA.49.6742.01A.11R.1858.07	0	0.083	0.077	0.046	0	0.058	0.131	0.048	0.011	0.255	0.219	0.057	0.028	0.109	0.121	0.15	0.097	0.15	0.177	0.245	0.228	0.051	0.115	0.135	0.649
TCGA.49.6742.11A.01R.1858.07	0	0.069	0.089	0.048	0.008	0	0.151	0.053	0.101	0.189	0.22	0	0.037	0.188	0.174	0.231	0.064	0.169	0.315	0.264	0.196	0.067	0.148	0.159	0.774
TCGA.49.6743.01A.11R.1858.07	0	0.018	0.192	0.099	0.109	0.138	0.329	0.148	0.066	0.183	0.302	0.116	0.018	0.014	0.059	0.23	0.117	0.178	0.237	0.311	0.123	0.049	0.095	0.206	0.748
TCGA.49.6743.11A.01R.1858.07	0	0.032	0.184	0.026	0.059	0.002	0.187	0.027	0.153	0.159	0.411	0.062	0.035	0.19	0.167	0.146	0.074	0.136	0.293	0.39	0.16	0.068	0.153	0.173	0.763
TCGA.49.6744.01A.11R.1858.07	0	0.064	0.216	0.078	0.104	0.073	0.309	0.082	0.098	0.155	0.418	0.123	0	0.082	0.11	0.244	0.102	0.144	0.251	0.329	0.09	0.083	0.195	0.219	0.787
TCGA.49.6744.11A.01R.1858.07	0	0	0.205	0.019	0.002	0.015	0.2	0.037	0.141	0.182	0.382	0.061	0.025	0.209	0.172	0.183	0.075	0.163	0.27	0.37	0.203	0.081	0.158	0.15	0.786
TCGA.49.6745.01A.11R.1858.07	0	0.048	0.217	0.096	0.074	0.112	0.32	0.184	0.098	0.131	0.332	0.133	0.017	0.031	0.151	0.205	0.107	0.154	0.262	0.304	0.124	0.04	0.167	0.183	0.754
TCGA.49.6745.11A.01R.1858.07	0	0.016	0.207	0.045	0	0.01	0.168	0.153	0.128	0.117	0.395	0.055	0.077	0.179	0.184	0.19	0.066	0.098	0.281	0.389	0.181	0.124	0.143	0.211	0.78
TCGA.49.6761.01A.31R.1949.07	0	0.039	0.297	0.169	0.035	0.112	0.313	0.21	0.063	0.079	0.36	0.092	0.073	0	0.081	0.189	0.064	0.077	0.193	0.337	0.091	0.061	0.183	0.216	0.675
TCGA.49.6761.11A.01R.1949.07	0	0.003	0.264	0	0	0	0.06	0.043	0.129	0.162	0.411	0.054	0	0.21	0.2	0.225	0.079	0.143	0.291	0.426	0.183	0.154	0.134	0.178	0.83
TCGA.49.6767.01A.11R.1858.07	0	0.075	0.283	0.158	0.059	0.118	0.237	0.27	0.065	0	0.28	0.07	0.096	0.02	0	0.196	0.074	0.139	0.219	0.299	0.113	0.095	0.135	0.215	0.695
TCGA.49.AAQV.01A.11R.A39D.07	0	0.084	0.162	0.073	0.071	0.164	0.208	0.127	0.109	0.176	0.396	0.127	0.018	0.069	0.047	0.152	0.133	0.113	0.131	0.255	0.098	0.03	0.242	0.285	0.705
TCGA.49.AAR0.01A.21R.A39D.07	0	0.064	0.139	0.103	0.067	0.075	0.198	0.154	0.092	0.132	0.43	0.049	0.018	0.112	0.117	0.175	0.147	0.105	0.262	0.354	0.095	0.085	0.208	0.245	0.795
TCGA.49.AAR2.01A.11R.A39D.07	0	0.041	0.177	0.089	0.097	0.111	0.265	0.132	0.048	0.173	0.386	0.114	0.057	0	0.081	0.077	0.153	0.119	0.173	0.317	0.112	0.049	0.198	0.262	0.706
TCGA.49.AAR3.01A.11R.A41B.07	0	0.057	0.273	0.159	0.084	0.114	0.269	0.222	0.112	0.061	0.337	0.096	0	0.05	0.097	0.261	0.122	0.137	0.257	0.376	0.088	0.06	0.157	0.242	0.821
TCGA.49.AAR4.01A.12R.A41B.07	0	0.05	0.25	0.122	0.12	0.056	0.277	0.216	0.085	0.102	0.421	0.122	0.017	0.005	0.022	0.101	0.101	0.107	0.156	0.347	0.044	0.141	0.265	0.285	0.704
TCGA.49.AAR9.01A.21R.A41B.07	0	0.089	0.1	0.143	0	0.178	0.179	0.115	0.131	0.129	0.074	0.036	0.09	0	0.104	0.113	0.09	0.141	0.129	0.235	0.188	0.043	0.103	0.16	0.58
TCGA.49.AARE.01A.11R.A41B.07	0	0.018	0.177	0.107	0.074	0.072	0.18	0.138	0.147	0.143	0.369	0.107	0.047	0.077	0.123	0.151	0.143	0.12	0.168	0.378	0.095	0.027	0.228	0.208	0.746
TCGA.49.AARN.01A.21R.A41B.07	0	0.089	0.153	0.076	0.068	0.115	0.215	0.144	0.121	0.182	0.329	0.089	0.036	0.061	0.054	0.135	0.157	0.08	0.096	0.317	0.096	0.043	0.235	0.267	0.691
TCGA.49.AARO.01A.12R.A41B.07	0	0.08	0.233	0.098	0.087	0.111	0.285	0.155	0.117	0.073	0.358	0.059	0.017	0.138	0.089	0.225	0.123	0.164	0.213	0.384	0.096	0.034	0.236	0.209	0.825
TCGA.49.AARQ.01A.11R.A41B.07	0	0.086	0.17	0.138	0.001	0.053	0.19	0.215	0.023	0.184	0.299	0.059	0.083	0.069	0.092	0.096	0.122	0.158	0.164	0.334	0.098	0.081	0.178	0.235	0.693
TCGA.49.AARR.01A.11R.A41B.07	0	0.043	0.179	0.067	0.074	0.121	0.24	0.077	0.113	0.134	0.396	0.073	0	0.141	0.115	0.134	0.115	0.1	0.198	0.391	0.103	0.069	0.27	0.23	0.771
TCGA.4B.A93V.01A.11R.A39D.07	0	0.005	0.23	0.118	0.09	0.191	0.274	0.177	0	0.156	0.347	0.085	0.076	0	0.068	0.158	0.093	0.1	0.181	0.369	0.118	0.056	0.163	0.253	0.717
TCGA.50.5044.01A.21R.1858.07	0	0.075	0.243	0.081	0.068	0.105	0.311	0.135	0.173	0.082	0.239	0	0.023	0.09	0.125	0.249	0.085	0.189	0.2	0.337	0.078	0.071	0.154	0.221	0.757
TCGA.50.5045.01A.01R.1628.07	0	0.078	0.187	0.112	0.1	0.115	0.259	0.141	0.133	0.062	0.387	0.1	0.021	0.131	0.115	0.246	0.156	0.097	0.304	0.365	0.047	0.053	0.168	0.266	0.825
TCGA.50.5049.01A.01R.1628.07	0	0.048	0.222	0.139	0.115	0.113	0.286	0.173	0.075	0.038	0.427	0.13	0	0.088	0.107	0.158	0.136	0.088	0.318	0.312	0.069	0.091	0.148	0.282	0.756
TCGA.50.5051.01A.21R.1858.07	0	0.047	0.085	0.073	0.036	0.204	0.199	0.043	0.062	0.199	0.299	0.105	0.036	0.071	0.118	0.149	0.173	0.111	0.07	0.293	0.14	0.034	0.211	0.195	0.671
TCGA.50.5055.01A.01R.1628.07	0	0.073	0.179	0.109	0.098	0.079	0.265	0.119	0.1	0.074	0.443	0.128	0.001	0.088	0.147	0.155	0.266	0.075	0.152	0.331	0	0.109	0.211	0.271	0.731
TCGA.50.5066.01A.01R.1628.07	0	0.011	0.21	0.131	0.116	0.119	0.27	0.206	0.059	0.028	0.376	0.099	0.074	0.122	0.173	0.169	0.096	0.083	0.272	0.393	0.047	0.102	0.122	0.249	0.716
TCGA.50.5066.02A.11R.2090.07	0.005	0.103	0.136	0.048	0.117	0.094	0.291	0.125	0.067	0.153	0.324	0.121	0.034	0.058	0.04	0.1	0.082	0.133	0.222	0.236	0.152	0.077	0.213	0.167	0.653
TCGA.50.5068.01A.01R.1628.07	0	0.074	0.185	0.12	0.062	0.103	0.244	0.15	0.144	0.119	0.404	0.114	0.072	0.018	0.118	0.21	0.132	0.115	0.272	0.338	0.033	0.073	0.144	0.288	0.766
TCGA.50.5072.01A.21R.1858.07	0	0.061	0.11	0.031	0.08	0.124	0.249	0.059	0.072	0.22	0.339	0.131	0.028	0.092	0.129	0.176	0.078	0.16	0.218	0.252	0.173	0.016	0.145	0.2	0.701
TCGA.50.5930.01A.11R.1755.07	0	0.038	0.248	0.113	0.115	0.045	0.245	0.151	0	0.168	0.409	0.103	0	0.064	0.089	0.151	0.136	0.182	0.202	0.285	0.092	0.084	0.169	0.214	0.716
TCGA.50.5930.11A.01R.1755.07	0	0.005	0.16	0.032	0	0	0.193	0.055	0.119	0.179	0.306	0.032	0	0.216	0.191	0.17	0.049	0.184	0.326	0.407	0.221	0.088	0.096	0.159	0.806
TCGA.50.5931.01A.11R.1755.07	0.041	0.152	0.015	0.105	0.01	0.042	0.25	0	0.11	0.093	0.14	0.009	0.029	0.052	0.063	0.104	0.091	0.158	0.098	0.021	0.226	0.05	0.136	0.162	0.499
TCGA.50.5931.11A.01R.1858.07	0	0.022	0.218	0.073	0.05	0	0.122	0.019	0.153	0.169	0.356	0.02	0	0.162	0.158	0.237	0.078	0.118	0.335	0.409	0.178	0.087	0.156	0.147	0.829
TCGA.50.5932.01A.11R.1755.07	0.008	0.094	0.151	0.021	0.073	0.117	0.204	0.104	0.055	0.204	0.216	0.09	0.048	0.072	0.04	0.202	0.059	0.172	0.219	0.187	0.189	0.04	0.139	0.135	0.65
TCGA.50.5932.11A.01R.1755.07	0	0.015	0.249	0.033	0.034	0.015	0.206	0.034	0.138	0.162	0.354	0.036	0	0.212	0.144	0.16	0.072	0.167	0.279	0.429	0.196	0.106	0.153	0.17	0.813
TCGA.50.5933.01A.11R.1755.07	0	0.045	0.213	0.122	0.103	0.114	0.294	0.129	0	0.113	0.188	0.084	0.054	0.096	0.097	0.242	0.079	0.196	0.358	0.145	0.148	0.026	0.149	0.121	0.719
TCGA.50.5933.11A.01R.1755.07	0	0.016	0.24	0.062	0.031	0.012	0.162	0.048	0.124	0.184	0.362	0.012	0	0.182	0.137	0.129	0.033	0.158	0.297	0.353	0.272	0.047	0.149	0.153	0.772
TCGA.50.5935.01A.11R.1755.07	0	0.059	0.187	0.035	0.091	0.107	0.318	0.121	0.116	0.154	0.339	0.114	0.015	0.071	0.11	0.253	0.103	0.064	0.142	0.304	0.11	0.074	0.211	0.209	0.698
TCGA.50.5935.11A.01R.1858.07	0	0.025	0.241	0.031	0.052	0.017	0.194	0.077	0.138	0.152	0.346	0.069	0.011	0.165	0.166	0.175	0.065	0.148	0.265	0.396	0.169	0.128	0.191	0.147	0.778
TCGA.50.5936.01A.11R.1628.07	0	0.055	0.084	0.057	0.108	0.164	0.394	0.066	0.011	0.155	0.341	0.105	0.005	0.046	0.143	0.241	0.086	0.194	0.288	0.119	0.147	0.018	0.182	0.157	0.707
TCGA.50.5936.11A.01R.1628.07	0	0	0.206	0.047	0	0.01	0.178	0.096	0.105	0.163	0.448	0.042	0.014	0.227	0.171	0.148	0.079	0.134	0.284	0.445	0.183	0.108	0.156	0.177	0.803
TCGA.50.5939.01A.11R.1628.07	0	0.045	0.171	0.088	0.135	0.135	0.365	0.057	0.002	0.135	0.321	0.115	0.004	0.075	0.096	0.203	0.141	0.223	0.288	0.3	0.12	0.005	0.132	0.146	0.777
TCGA.50.5939.11A.01R.1628.07	0	0.029	0.083	0.028	0.08	0.014	0.195	0	0.159	0.168	0.347	0.059	0	0.207	0.136	0.149	0.064	0.184	0.33	0.325	0.227	0.039	0.165	0.127	0.786
TCGA.50.5941.01A.11R.1755.07	0	0.05	0.197	0.15	0.099	0.085	0.301	0.201	0.057	0.104	0.383	0.103	0.011	0.085	0.077	0.186	0.135	0.125	0.275	0.301	0.111	0.068	0.149	0.242	0.762
TCGA.50.5942.01A.21R.1755.07	0	0.067	0.136	0.004	0.124	0.067	0.25	0.047	0.118	0.209	0.388	0.122	0	0.09	0.136	0.107	0.13	0.091	0.112	0.275	0.13	0.056	0.232	0.236	0.656
TCGA.50.5944.01A.11R.1755.07	0	0.089	0.083	0.04	0.069	0.067	0.242	0.055	0.165	0.175	0.253	0.043	0.044	0.142	0.108	0.218	0.099	0.166	0.28	0.291	0.177	0.018	0.152	0.138	0.761
TCGA.50.5946.01A.11R.1755.07	0	0.099	0.071	0.063	0.069	0.162	0.281	0.129	0.005	0.135	0.258	0.045	0.079	0	0.116	0.168	0.105	0.133	0.19	0.153	0.155	0.021	0.166	0.211	0.641
TCGA.50.5946.02A.11R.2090.07	0	0.091	0.17	0.084	0.097	0.106	0.277	0.164	0.094	0.143	0.33	0.123	0.007	0.085	0.11	0.138	0.112	0.114	0.158	0.259	0.121	0.037	0.149	0.236	0.644
TCGA.50.6590.01A.12R.1858.07	0	0	0.235	0.144	0.117	0.109	0.31	0.223	0.015	0.054	0.311	0.114	0.016	0.137	0.071	0.226	0.14	0.124	0.262	0.405	0.114	0.049	0.138	0.188	0.798
TCGA.50.6591.01A.11R.1755.07	0.031	0.161	0	0	0.065	0.002	0.095	0.016	0	0.118	0.017	0.036	0	0.097	0.027	0.119	0.117	0.163	0.086	0.018	0.26	0.068	0.078	0.077	0.459
TCGA.50.6592.01A.11R.1755.07	0	0.018	0.257	0.134	0.078	0.121	0.341	0.177	0.034	0.109	0.311	0.141	0.033	0.045	0.142	0.196	0.105	0.133	0.243	0.347	0.131	0.058	0.122	0.183	0.73
TCGA.50.6593.01A.11R.1755.07	0	0.119	0.079	0.071	0.088	0.053	0.241	0.013	0.128	0.158	0.192	0.059	0	0.14	0.097	0.257	0.119	0.228	0.312	0.238	0.172	0	0.198	0.164	0.844
TCGA.50.6594.01A.11R.1755.07	0	0.017	0.254	0.118	0.077	0.145	0.277	0.126	0	0.181	0.188	0.063	0.046	0.017	0.063	0.224	0.114	0.141	0.216	0.309	0.144	0.045	0.125	0.133	0.703
TCGA.50.6595.01A.12R.1858.07	0	0.055	0.231	0.109	0.062	0.093	0.3	0.218	0.095	0.074	0.253	0.088	0.053	0.089	0.088	0.228	0.078	0.15	0.289	0.304	0.134	0.055	0.143	0.145	0.736
TCGA.50.6595.11A.01R.1858.07	0	0.009	0.245	0.056	0.023	0	0.219	0.133	0.13	0.118	0.425	0.089	0.019	0.171	0.158	0.148	0.064	0.102	0.265	0.397	0.169	0.109	0.186	0.203	0.767
TCGA.50.6597.01A.11R.1858.07	0	0.046	0.184	0.125	0.079	0.071	0.154	0.151	0.046	0.143	0.378	0.068	0.03	0.142	0.13	0.167	0.159	0.001	0.116	0.316	0.101	0.123	0.193	0.276	0.664
TCGA.50.6673.01A.11R.1949.07	0	0.113	0.074	0.091	0.12	0.077	0.267	0.033	0.049	0.173	0.271	0.116	0.023	0.071	0.081	0.203	0.111	0.161	0.236	0.237	0.131	0.03	0.209	0.159	0.724
TCGA.50.7109.01A.11R.2039.07	0	0.038	0.197	0.113	0.084	0.187	0.226	0.186	0.044	0.188	0.369	0.145	0.035	0	0.069	0.133	0.102	0.104	0.206	0.307	0.163	0.036	0.181	0.256	0.727
TCGA.50.8457.01A.11R.2326.07	0	0.064	0.204	0.074	0.13	0.067	0.301	0.119	0.09	0.148	0.432	0.138	0	0.054	0.058	0.142	0.175	0.076	0.199	0.327	0.075	0.046	0.248	0.244	0.743
TCGA.50.8459.01A.11R.2326.07	0	0.092	0.178	0.05	0.093	0.083	0.323	0.007	0.144	0.112	0.331	0.099	0	0.136	0.086	0.245	0.129	0.217	0.302	0.305	0.09	0.026	0.245	0.185	0.859
TCGA.50.8460.01A.11R.2326.07	0	0.081	0.189	0.041	0.111	0.077	0.354	0.054	0.124	0.136	0.377	0.097	0	0.038	0.167	0.187	0.141	0.116	0.131	0.335	0.118	0.078	0.223	0.237	0.745
TCGA.53.7624.01A.11R.2066.07	0	0.031	0.2	0.123	0.055	0.213	0.258	0.215	0.16	0.063	0.31	0.05	0.083	0.006	0.019	0.191	0.078	0.096	0.201	0.394	0.144	0.045	0.113	0.252	0.734
TCGA.53.7626.01A.12R.2066.07	0	0.055	0.206	0.109	0.11	0.07	0.306	0.128	0.091	0.092	0.451	0.118	0	0.12	0.067	0.132	0.124	0.102	0.256	0.368	0.101	0.088	0.163	0.229	0.737
TCGA.53.7813.01A.11R.2170.07	0	0.11	0.158	0.138	0.044	0.076	0.235	0.236	0.097	0.185	0.324	0.136	0.057	0	0.077	0.061	0.159	0.132	0.049	0.312	0.144	0.017	0.194	0.211	0.631
TCGA.53.A4EZ.01A.12R.A24X.07	0	0.096	0.128	0.05	0.032	0.108	0.234	0.104	0.112	0.191	0.326	0.077	0.042	0.023	0.078	0.152	0.144	0.151	0.131	0.29	0.16	0.072	0.166	0.207	0.701
TCGA.55.1592.01A.01R.0946.07	0	0.067	0.113	0.031	0.09	0.099	0.252	0.043	0.1	0.182	0.316	0.084	0.021	0.083	0.116	0.229	0.11	0.168	0.32	0.27	0.149	0.07	0.14	0.176	0.781
TCGA.55.1594.01A.01R.0946.07	0	0.044	0.189	0.098	0.093	0.116	0.267	0.197	0.05	0.072	0.252	0.134	0.05	0.116	0.052	0.202	0.121	0.175	0.227	0.318	0.131	0.043	0.158	0.192	0.762
TCGA.55.1595.01A.01R.0946.07	0	0.085	0.177	0.099	0.091	0.104	0.338	0.176	0.018	0.16	0.304	0.105	0.056	0.046	0.055	0.15	0.099	0.117	0.216	0.245	0.117	0.057	0.209	0.181	0.667
TCGA.55.1596.01A.01R.0946.07	0	0.073	0.096	0.096	0.094	0.192	0.315	0.068	0	0.207	0.267	0.077	0.03	0.078	0.087	0.168	0.128	0.09	0.197	0.219	0.137	0.043	0.141	0.226	0.653
TCGA.55.5899.01A.11R.1628.07	0	0.103	0.226	0.096	0.076	0.128	0.33	0.165	0.109	0.073	0.253	0.111	0.011	0.015	0.123	0.199	0.122	0.113	0.262	0.346	0.131	0.056	0.158	0.17	0.751
TCGA.55.6543.01A.11R.1755.07	0	0.048	0.14	0.084	0.074	0.092	0.263	0.042	0.083	0.173	0.278	0.057	0.019	0.091	0.111	0.228	0.067	0.186	0.346	0.261	0.167	0.062	0.16	0.132	0.774
TCGA.55.6642.01A.11R.1858.07	0	0.055	0.253	0.111	0.16	0.166	0.324	0.164	0.086	0.132	0.267	0.145	0.005	0	0.05	0.155	0.146	0.111	0.197	0.348	0.108	0.062	0.173	0.227	0.733
TCGA.55.6712.01A.11R.1858.07	0	0.045	0.195	0.102	0.108	0.105	0.289	0.189	0.108	0.077	0.393	0.144	0.018	0.025	0.086	0.222	0.12	0.122	0.204	0.275	0.095	0.118	0.184	0.239	0.73
TCGA.55.6968.01A.11R.1949.07	0	0.067	0.279	0.128	0.117	0.131	0.29	0.242	0.035	0.042	0.306	0.116	0.001	0.021	0.089	0.196	0.14	0.142	0.256	0.319	0.125	0.065	0.177	0.206	0.781
TCGA.55.6968.11A.01R.1949.07	0	0	0.168	0.05	0.081	0.007	0.225	0.061	0.099	0.158	0.366	0.074	0.022	0.194	0.166	0.122	0.149	0.146	0.311	0.302	0.181	0.08	0.203	0.235	0.825
TCGA.55.6969.01A.11R.1949.07	0	0.097	0.232	0.116	0.117	0.094	0.286	0.188	0.136	0.062	0.395	0.148	0.005	0	0.045	0.222	0.14	0.113	0.22	0.332	0.098	0.085	0.18	0.232	0.769
TCGA.55.6969.11A.01R.1949.07	0	0.044	0.176	0.032	0.103	0.024	0.233	0.032	0.139	0.125	0.426	0.078	0.006	0.142	0.133	0.189	0.126	0.162	0.302	0.37	0.158	0.082	0.219	0.169	0.847
TCGA.55.6970.01A.11R.1949.07	0	0.047	0.148	0.09	0.107	0.131	0.314	0.187	0.071	0.155	0.377	0.141	0.012	0.07	0.089	0.183	0.118	0.106	0.246	0.32	0.11	0.051	0.133	0.169	0.693
TCGA.55.6970.11A.01R.1949.07	0	0	0.218	0.067	0.083	0.017	0.271	0.134	0.089	0.103	0.466	0.082	0.014	0.172	0.14	0.189	0.087	0.092	0.275	0.388	0.151	0.105	0.223	0.186	0.795
TCGA.55.6971.01A.11R.1949.07	0	0.014	0.226	0.14	0.151	0.123	0.342	0.186	0.087	0.104	0.398	0.116	0	0.019	0.117	0.183	0.112	0.105	0.27	0.344	0.08	0.049	0.193	0.228	0.758
TCGA.55.6971.11A.01R.1949.07	0	0.005	0.197	0.04	0.045	0.023	0.238	0.05	0.127	0.173	0.361	0.046	0.006	0.193	0.153	0.204	0.063	0.167	0.332	0.388	0.177	0.063	0.188	0.158	0.839
TCGA.55.6972.01A.11R.1949.07	0	0.102	0.133	0.058	0	0.08	0.142	0.049	0.075	0.199	0.23	0.005	0.025	0	0.132	0.054	0.152	0.066	0	0.272	0.203	0.114	0.105	0.22	0.536
TCGA.55.6972.11A.01R.1949.07	0	0	0.255	0.065	0.025	0	0.197	0.146	0.102	0.131	0.449	0.04	0.032	0.153	0.156	0.16	0.063	0.119	0.268	0.442	0.152	0.141	0.202	0.182	0.794
TCGA.55.6975.01A.11R.1949.07	0	0.076	0.105	0.073	0.111	0.113	0.299	0.011	0.103	0.17	0.328	0.14	0.019	0.077	0.11	0.148	0.132	0.127	0.169	0.22	0.107	0.041	0.142	0.172	0.609
TCGA.55.6975.11A.01R.1949.07	0	0.029	0.237	0.039	0.105	0.015	0.209	0.038	0.136	0.174	0.428	0.056	0.003	0.116	0.13	0.111	0.074	0.136	0.268	0.408	0.197	0.108	0.181	0.157	0.766
TCGA.55.6978.01A.11R.1949.07	0	0.035	0.266	0.134	0.081	0.136	0.365	0.219	0.085	0.036	0.357	0.127	0	0.085	0.063	0.216	0.089	0.147	0.264	0.334	0.074	0.081	0.176	0.216	0.758
TCGA.55.6978.11A.01R.1949.07	0	0.006	0.258	0.027	0.039	0.001	0.201	0.109	0.107	0.148	0.425	0.073	0.019	0.187	0.164	0.142	0.063	0.121	0.26	0.407	0.195	0.115	0.2	0.165	0.777
TCGA.55.6979.01A.11R.1949.07	0	0.055	0.216	0.15	0.088	0.121	0.278	0.197	0.071	0.098	0.351	0.104	0.015	0.081	0.117	0.189	0.142	0.138	0.3	0.314	0.073	0.033	0.191	0.225	0.787
TCGA.55.6979.11A.01R.1949.07	0	0.038	0.229	0.086	0.082	0.023	0.298	0.137	0.079	0.122	0.457	0.044	0.018	0.134	0.141	0.239	0.084	0.111	0.333	0.375	0.136	0.072	0.175	0.158	0.806
TCGA.55.6980.01A.11R.1949.07	0	0.097	0.185	0.055	0.092	0.086	0.283	0.122	0.126	0.119	0.427	0.068	0.029	0.085	0.065	0.201	0.086	0.126	0.23	0.299	0.122	0.043	0.241	0.212	0.759
TCGA.55.6980.11A.01R.1949.07	0	0.03	0.205	0.049	0.064	0.013	0.312	0.136	0.091	0.128	0.39	0.045	0.043	0.177	0.134	0.141	0.081	0.114	0.248	0.35	0.16	0.096	0.214	0.191	0.75
TCGA.55.6981.01A.11R.1949.07	0.002	0.086	0.001	0.083	0.091	0.114	0.252	0.024	0.033	0.178	0.268	0.097	0.027	0.125	0.124	0.216	0.157	0.198	0.182	0.158	0.113	0.017	0.19	0.128	0.671
TCGA.55.6981.11A.01R.1949.07	0	0.038	0.163	0.017	0.065	0.022	0.232	0.037	0.123	0.154	0.419	0.027	0	0.19	0.159	0.181	0.05	0.159	0.284	0.4	0.177	0.078	0.223	0.142	0.809
TCGA.55.6982.01A.11R.1949.07	0	0.08	0.155	0.123	0.086	0.126	0.284	0.18	0.148	0.154	0.223	0.114	0.031	0.014	0.093	0.266	0.12	0.162	0.295	0.327	0.108	0	0.122	0.14	0.771
TCGA.55.6982.11A.01R.1949.07	0	0.011	0.235	0.062	0.07	0.006	0.269	0.17	0.111	0.116	0.418	0.094	0.028	0.123	0.146	0.17	0.082	0.111	0.271	0.356	0.151	0.085	0.217	0.196	0.777
TCGA.55.6983.01A.11R.1949.07	0	0.042	0.191	0.072	0.082	0.092	0.263	0.084	0.15	0.165	0.455	0.177	0	0.05	0.093	0.169	0.163	0.072	0.152	0.349	0.052	0.076	0.222	0.238	0.709
TCGA.55.6983.11A.01R.1949.07	0	0.03	0.175	0.071	0.06	0.038	0.283	0.11	0.113	0.154	0.39	0.011	0.013	0.189	0.147	0.225	0.065	0.145	0.313	0.378	0.159	0.067	0.168	0.166	0.811
TCGA.55.6984.01A.11R.1949.07	0	0.034	0.153	0.037	0.109	0.194	0.253	0.073	0.101	0.174	0.355	0.14	0.045	0.02	0.132	0.103	0.154	0.134	0.051	0.304	0.153	0	0.203	0.249	0.675
TCGA.55.6984.11A.01R.1949.07	0	0.029	0.131	0.061	0.028	0.001	0.21	0.109	0.134	0.173	0.395	0.01	0.061	0.189	0.172	0.231	0.068	0.14	0.298	0.342	0.176	0.058	0.178	0.151	0.793
TCGA.55.6985.01A.11R.1949.07	0	0.057	0.223	0.122	0.1	0.092	0.333	0.188	0.118	0.11	0.427	0.125	0	0.032	0.034	0.132	0.095	0.113	0.201	0.354	0.103	0.066	0.209	0.212	0.709
TCGA.55.6985.11A.01R.1949.07	0	0.034	0.223	0.059	0.058	0	0.239	0.11	0.117	0.12	0.41	0.071	0.019	0.178	0.149	0.191	0.1	0.127	0.297	0.418	0.165	0.06	0.21	0.161	0.835
TCGA.55.6986.01A.11R.1949.07	0.016	0.049	0.145	0.031	0.092	0.078	0.238	0.062	0.152	0.158	0.382	0.099	0.008	0.055	0.112	0.238	0.11	0.125	0.264	0.232	0.135	0.062	0.183	0.193	0.74
TCGA.55.6986.11A.01R.1949.07	0	0.024	0.178	0.053	0.017	0.003	0.16	0.091	0.117	0.164	0.416	0.077	0.026	0.18	0.129	0.156	0.076	0.088	0.246	0.39	0.169	0.111	0.224	0.158	0.755
TCGA.55.6987.01A.11R.1949.07	0	0.021	0.277	0.14	0.109	0.111	0.327	0.174	0.067	0.052	0.415	0.11	0	0.104	0.081	0.155	0.126	0.121	0.249	0.383	0.118	0.1	0.15	0.282	0.793
TCGA.55.7227.01A.11R.2039.07	0	0.082	0.185	0.069	0.104	0.087	0.317	0.128	0.109	0.141	0.342	0.129	0.032	0.093	0.092	0.25	0.078	0.111	0.262	0.295	0.102	0.052	0.203	0.208	0.755
TCGA.55.7281.01A.11R.2039.07	0	0.063	0.203	0.088	0.068	0.074	0.251	0.117	0.065	0.159	0.371	0.069	0.01	0.092	0.078	0.292	0.107	0.183	0.305	0.276	0.136	0.038	0.18	0.188	0.834
TCGA.55.7283.01A.11R.2039.07	0	0.049	0.196	0.094	0.045	0.088	0.237	0.155	0.108	0.151	0.391	0.086	0.048	0.092	0.055	0.228	0.068	0.063	0.239	0.32	0.161	0.091	0.137	0.202	0.709
TCGA.55.7284.01B.11R.2241.07	0	0.054	0.171	0.046	0.061	0.084	0.265	0.065	0.12	0.165	0.327	0.084	0.035	0.143	0.127	0.184	0.083	0.158	0.255	0.327	0.122	0.058	0.194	0.182	0.752
TCGA.55.7570.01A.11R.2039.07	0	0.116	0.141	0.09	0.087	0.137	0.27	0.184	0.128	0.095	0.232	0.001	0.068	0.047	0.055	0.132	0.098	0.092	0.109	0.277	0.148	0.095	0.074	0.212	0.571
TCGA.55.7573.01A.11R.2039.07	0	0.09	0.145	0.074	0.101	0.085	0.287	0.166	0.113	0.151	0.388	0.115	0.023	0.067	0.074	0.157	0.154	0.08	0.152	0.301	0.086	0.039	0.264	0.204	0.699
TCGA.55.7574.01A.11R.2039.07	0	0.034	0.21	0.073	0.133	0.132	0.286	0.106	0.089	0.162	0.468	0.113	0	0.065	0.097	0.116	0.147	0.085	0.143	0.327	0.056	0.1	0.26	0.259	0.697
TCGA.55.7576.01A.11R.2066.07	0	0.078	0.135	0.049	0.103	0.112	0.314	0.065	0.123	0.146	0.286	0.115	0.027	0.091	0.048	0.238	0.123	0.137	0.267	0.247	0.138	0.066	0.127	0.178	0.727
TCGA.55.7724.01A.11R.2170.07	0	0.09	0.225	0.059	0.01	0.073	0.294	0.125	0.151	0.114	0.284	0.135	0	0.126	0.14	0.23	0.119	0.086	0.283	0.329	0.127	0.042	0.141	0.167	0.741
TCGA.55.7725.01A.11R.2170.07	0.002	0.096	0.188	0.108	0	0.083	0.325	0.196	0.133	0.159	0.325	0.119	0.018	0	0.088	0.209	0.123	0.095	0.221	0.277	0.087	0.042	0.199	0.162	0.687
TCGA.55.7726.01A.11R.2170.07	0	0.139	0.117	0.079	0.124	0.158	0.35	0.106	0.027	0.114	0.088	0.074	0.015	0.094	0.029	0.267	0.111	0.196	0.26	0.167	0.146	0.022	0.087	0.112	0.673
TCGA.55.7727.01A.11R.2170.07	0	0.084	0.183	0.089	0.077	0.141	0.344	0.184	0.062	0.166	0.249	0.149	0.055	0	0.049	0.192	0.168	0.045	0.194	0.253	0.121	0.003	0.221	0.149	0.672
TCGA.55.7728.01A.11R.2187.07	0	0.001	0.216	0.089	0.086	0.105	0.262	0.107	0.092	0.088	0.404	0.059	0	0.111	0.144	0.233	0.127	0.166	0.381	0.312	0.09	0.039	0.232	0.246	0.894
TCGA.55.7815.01A.11R.2170.07	0	0.058	0.143	0.048	0.017	0.155	0.323	0.186	0.041	0.2	0.241	0.173	0.025	0	0.196	0.291	0.104	0.088	0.259	0.209	0.117	0	0.195	0.137	0.7
TCGA.55.7816.01A.11R.2170.07	0	0.035	0.18	0.111	0.071	0.088	0.307	0.189	0.086	0.14	0.273	0.076	0.026	0.064	0.064	0.213	0.053	0.191	0.353	0.287	0.126	0.087	0.213	0.18	0.808
TCGA.55.7903.01A.11R.2170.07	0	0.043	0.233	0.128	0.055	0.086	0.272	0.226	0.061	0.122	0.318	0.083	0.07	0.006	0.019	0.162	0.091	0.1	0.22	0.312	0.154	0.099	0.187	0.217	0.722
TCGA.55.7907.01A.11R.2170.07	0	0.068	0.224	0.12	0.115	0.102	0.295	0.194	0.033	0.055	0.38	0.106	0.028	0.029	0.095	0.163	0.092	0.15	0.251	0.299	0.094	0.046	0.194	0.224	0.733
TCGA.55.7910.01A.11R.2170.07	0	0.068	0.115	0.075	0.12	0.206	0.224	0.055	0.053	0.24	0.334	0.106	0.011	0.043	0.054	0.107	0.145	0.17	0.124	0.177	0.167	0.043	0.182	0.207	0.64
TCGA.55.7911.01A.11R.2170.07	0	0.017	0.247	0.149	0.075	0.078	0.339	0.203	0.059	0.136	0.399	0.137	0.051	0	0.062	0.17	0.114	0.08	0.238	0.311	0.098	0.061	0.188	0.222	0.711
TCGA.55.7913.01B.11R.2241.07	0	0.053	0.099	0.092	0.062	0.248	0.279	0.178	0	0.171	0.252	0.09	0.06	0.025	0.025	0.16	0.083	0.169	0.17	0.147	0.213	0.016	0.119	0.22	0.641
TCGA.55.7914.01A.11R.2170.07	0.002	0.091	0.166	0.1	0.125	0.08	0.22	0.2	0.071	0.11	0.332	0.114	0.094	0	0.089	0.121	0.127	0.092	0.142	0.263	0.129	0.063	0.191	0.221	0.644
TCGA.55.7994.01A.11R.2187.07	0	0	0.285	0.136	0.081	0.118	0.347	0.208	0.089	0.119	0.306	0.111	0.013	0	0.034	0.247	0.106	0.105	0.26	0.334	0.114	0.093	0.186	0.244	0.798
TCGA.55.7995.01A.11R.2187.07	0	0	0.254	0.143	0.075	0.098	0.325	0.21	0.11	0.065	0.365	0.121	0.005	0.047	0.074	0.117	0.167	0.156	0.257	0.372	0.12	0.041	0.148	0.258	0.798
TCGA.55.8085.01A.11R.2241.07	0	0.057	0.211	0.135	0.073	0.105	0.346	0.23	0.071	0.133	0.361	0.098	0.04	0	0.083	0.18	0.113	0.118	0.208	0.339	0.085	0.05	0.192	0.234	0.735
TCGA.55.8087.01A.11R.2241.07	0.031	0.081	0.065	0.039	0.097	0.066	0.208	0.028	0.17	0.238	0.254	0.05	0.044	0.077	0.131	0.251	0.097	0.16	0.222	0.217	0.168	0.008	0.21	0.122	0.725
TCGA.55.8089.01A.11R.2241.07	0	0.015	0.276	0.156	0.072	0.104	0.353	0.204	0.087	0.084	0.357	0.112	0.021	0.035	0.087	0.198	0.093	0.123	0.285	0.4	0.089	0.092	0.112	0.255	0.777
TCGA.55.8090.01A.11R.2241.07	0	0.081	0.109	0.075	0.091	0.137	0.258	0.106	0.124	0.105	0.329	0.1	0.029	0.076	0.07	0.208	0.089	0.177	0.249	0.263	0.129	0.029	0.226	0.147	0.744
TCGA.55.8091.01A.11R.2241.07	0	0.056	0.2	0.099	0.081	0.102	0.302	0.186	0.051	0.118	0.322	0.112	0.024	0.072	0.096	0.2	0.068	0.173	0.281	0.319	0.103	0.034	0.227	0.156	0.763
TCGA.55.8092.01A.11R.2241.07	0	0.032	0.247	0.143	0.128	0.097	0.326	0.208	0.077	0.114	0.388	0.137	0.041	0	0.047	0.09	0.158	0.137	0.164	0.363	0.083	0.043	0.172	0.265	0.716
TCGA.55.8094.01A.11R.2241.07	0	0.024	0.124	0.012	0.01	0.209	0.26	0	0.08	0.225	0.065	0.061	0.067	0	0.117	0.168	0.057	0.25	0.092	0.199	0.23	0	0.153	0.176	0.663
TCGA.55.8096.01A.11R.2241.07	0	0.084	0.145	0.085	0.109	0.095	0.271	0.065	0.152	0.116	0.295	0.066	0	0.138	0.105	0.216	0.122	0.171	0.302	0.247	0.128	0.029	0.18	0.19	0.778
TCGA.55.8097.01A.11R.2241.07	0.016	0.106	0.117	0.03	0.109	0.041	0.262	0.051	0.167	0.175	0.406	0.086	0.007	0.068	0.076	0.202	0.125	0.106	0.158	0.262	0.127	0.071	0.238	0.198	0.708
TCGA.55.8203.01A.11R.2241.07	0	0.058	0.181	0.099	0.124	0.11	0.314	0.228	0.131	0.147	0.366	0.143	0.033	0	0.059	0.154	0.157	0.13	0.155	0.339	0.102	0.037	0.173	0.233	0.721
TCGA.55.8204.01A.11R.2241.07	0	0.095	0.178	0.07	0.109	0.086	0.293	0.138	0.117	0.14	0.186	0.107	0.036	0.108	0.066	0.164	0.126	0.118	0.131	0.289	0.154	0.056	0.163	0.209	0.678
TCGA.55.8205.01A.11R.2241.07	0	0.041	0.247	0.128	0.08	0.116	0.301	0.212	0.093	0.052	0.349	0.092	0.01	0.099	0.086	0.232	0.125	0.14	0.334	0.3	0.1	0.059	0.158	0.216	0.803
TCGA.55.8206.01A.11R.2241.07	0	0.057	0.132	0.034	0.131	0.075	0.331	0.005	0.044	0.17	0.366	0.07	0	0.165	0.146	0.193	0.134	0.177	0.267	0.239	0.184	0.077	0.201	0.176	0.786
TCGA.55.8207.01A.11R.2241.07	0	0.058	0.204	0.03	0.098	0.072	0.238	0.081	0.135	0.139	0.421	0.082	0.001	0.101	0.091	0.24	0.063	0.156	0.301	0.318	0.113	0.056	0.231	0.171	0.796
TCGA.55.8208.01A.11R.2241.07	0	0.044	0.235	0.127	0.123	0.063	0.298	0.219	0.071	0.06	0.357	0.107	0	0.134	0.088	0.223	0.166	0.132	0.314	0.347	0.098	0.035	0.186	0.22	0.844
TCGA.55.8299.01A.11R.2287.07	0	0.03	0.269	0.132	0.051	0.084	0.36	0.2	0.106	0.156	0.367	0.094	0	0.056	0.089	0.189	0.086	0.125	0.258	0.419	0.088	0.062	0.193	0.206	0.783
TCGA.55.8301.01A.11R.2287.07	0	0.066	0.261	0.131	0.136	0.087	0.284	0.225	0.124	0.05	0.357	0.12	0.026	0	0.061	0.181	0.157	0.095	0.251	0.328	0.062	0.071	0.203	0.281	0.779
TCGA.55.8302.01A.11R.2326.07	0	0.048	0.189	0.117	0.068	0.116	0.226	0.257	0.068	0.144	0.281	0.038	0.078	0.097	0.048	0.176	0.106	0.172	0.255	0.329	0.121	0.029	0.151	0.165	0.739
TCGA.55.8505.01A.11R.2403.07	0	0.035	0.079	0.061	0.104	0.128	0.256	0.018	0.038	0.243	0.167	0.077	0.045	0.097	0.13	0.129	0.119	0.219	0.202	0.183	0.184	0.035	0.148	0.117	0.651
TCGA.55.8506.01A.11R.2403.07	0	0.043	0.183	0.132	0.033	0.138	0.307	0.169	0.108	0.185	0.237	0.027	0.05	0.038	0.048	0.229	0.08	0.193	0.297	0.239	0.154	0.023	0.13	0.165	0.744
TCGA.55.8507.01A.11R.2403.07	0.018	0.09	0.136	0.064	0.058	0.149	0.251	0.061	0.003	0.215	0.221	0.021	0.027	0.041	0.053	0.197	0.096	0.188	0.251	0.308	0.19	0.028	0.164	0.169	0.781
TCGA.55.8508.01A.11R.2403.07	0	0.04	0.195	0.076	0.136	0.143	0.321	0.078	0.029	0.185	0.306	0.11	0.003	0.076	0.048	0.122	0.177	0.178	0.131	0.33	0.152	0.032	0.175	0.214	0.741
TCGA.55.8510.01A.11R.2403.07	0	0.053	0.189	0.119	0.071	0.057	0.256	0.198	0.098	0.123	0.359	0.074	0.024	0.122	0.1	0.22	0.125	0.141	0.298	0.359	0.123	0.032	0.194	0.209	0.834
TCGA.55.8511.01A.11R.2403.07	0	0.068	0.194	0.097	0.119	0.105	0.352	0.168	0.07	0.103	0.397	0.136	0.025	0	0	0.155	0.126	0.151	0.207	0.328	0.089	0.065	0.214	0.21	0.74
TCGA.55.8512.01A.11R.2403.07	0.015	0.085	0.203	0.064	0.028	0.048	0.187	0.087	0.002	0.215	0.353	0.062	0.002	0.109	0.093	0.097	0.024	0.142	0.156	0.383	0.21	0.041	0.243	0.137	0.696
TCGA.55.8513.01A.11R.2403.07	0	0.018	0.133	0.045	0.084	0.087	0.281	0.038	0.069	0.171	0.333	0.093	0.008	0.128	0.135	0.248	0.12	0.115	0.338	0.282	0.137	0.048	0.234	0.174	0.824
TCGA.55.8514.01A.11R.2403.07	0.009	0.03	0.121	0.065	0.083	0.05	0.172	0.067	0.025	0.244	0.312	0.046	0.04	0.058	0.043	0.182	0.109	0.177	0.315	0.22	0.153	0.064	0.166	0.168	0.746
TCGA.55.8614.01A.11R.2403.07	0	0.14	0.113	0.025	0.094	0.081	0.3	0.069	0.195	0.15	0.356	0.077	0	0.086	0.073	0.129	0.095	0.107	0.158	0.274	0.135	0.044	0.209	0.167	0.637
TCGA.55.8615.01A.11R.2403.07	0	0.027	0.087	0.037	0.088	0.213	0.219	0.048	0.06	0.211	0.238	0.047	0.027	0.021	0.106	0.212	0.05	0.177	0.208	0.168	0.21	0	0.184	0.218	0.714
TCGA.55.8616.01A.11R.2403.07	0.019	0.077	0.105	0.039	0.079	0.064	0.191	0.088	0.173	0.131	0.386	0.155	0.018	0.098	0	0.063	0.157	0.106	0.108	0.294	0.124	0.051	0.226	0.237	0.657
TCGA.55.8619.01A.11R.2403.07	0	0.038	0.214	0.073	0.103	0.108	0.279	0.105	0.078	0.116	0.387	0.085	0	0.168	0.139	0.18	0.153	0.121	0.289	0.319	0.128	0.053	0.2	0.254	0.823
TCGA.55.8620.01A.11R.2403.07	0	0.08	0.179	0.107	0.115	0.148	0.297	0.215	0.098	0.066	0.288	0.115	0.032	0	0.006	0.179	0.176	0.113	0.194	0.345	0.126	0.086	0.192	0.235	0.78
TCGA.55.8621.01A.11R.2403.07	0	0.05	0.217	0.085	0.072	0.065	0.303	0.152	0.095	0.111	0.335	0.049	0.007	0.17	0.175	0.207	0.091	0.142	0.283	0.344	0.114	0.076	0.2	0.219	0.801
TCGA.55.A48X.01A.11R.A24H.07	0	0.072	0.193	0.075	0.101	0.074	0.33	0.125	0.104	0.159	0.416	0.148	0	0.032	0.071	0.105	0.213	0.08	0.118	0.319	0.076	0.051	0.259	0.222	0.696
TCGA.55.A48Y.01A.11R.A24H.07	0	0.036	0.18	0.097	0.121	0.122	0.295	0.113	0.102	0.173	0.279	0.129	0	0.025	0.093	0.198	0.151	0.152	0.18	0.283	0.128	0.04	0.145	0.151	0.694
TCGA.55.A48Z.01A.12R.A24X.07	0	0.038	0.195	0.119	0.111	0.082	0.239	0.16	0.11	0.126	0.31	0.094	0.037	0.083	0.058	0.214	0.125	0.154	0.226	0.309	0.101	0.034	0.195	0.214	0.77
TCGA.55.A490.01A.11R.A466.07	0	0.038	0.176	0.061	0.135	0.138	0.314	0.117	0.056	0.208	0.182	0.035	0.007	0.037	0.013	0.305	0.084	0.211	0.307	0.184	0.157	0.022	0.201	0.167	0.808
TCGA.55.A491.01A.11R.A24H.07	0	0.026	0.257	0.092	0.119	0.063	0.245	0.12	0.181	0.094	0.312	0.088	0.009	0.015	0.085	0.165	0.176	0.188	0.318	0.257	0.105	0.076	0.179	0.187	0.788
TCGA.55.A492.01A.11R.A24H.07	0	0.055	0.125	0.098	0.006	0.056	0.146	0.103	0.106	0.176	0.314	0.021	0.036	0.117	0.142	0.164	0.09	0.092	0.108	0.388	0.142	0.148	0.202	0.218	0.702
TCGA.55.A493.01A.11R.A24H.07	0	0.042	0.306	0.136	0.1	0.102	0.339	0.204	0.073	0.106	0.345	0.114	0.018	0	0.051	0.199	0.119	0.163	0.232	0.324	0.102	0.058	0.193	0.201	0.767
TCGA.55.A494.01A.11R.A24X.07	0	0.082	0.063	0.093	0.046	0.145	0.147	0	0	0.236	0.185	0.035	0.027	0	0.029	0.132	0.077	0.177	0.039	0.105	0.225	0	0.145	0.199	0.549
TCGA.55.A4DF.01A.11R.A24H.07	0	0.042	0.232	0.107	0.084	0.118	0.298	0.241	0.13	0.069	0.369	0.117	0.025	0.013	0.113	0.242	0.129	0.137	0.208	0.368	0.098	0.047	0.159	0.188	0.764
TCGA.55.A4DG.01A.11R.A24H.07	0.012	0.076	0.163	0.052	0.112	0.057	0.234	0.081	0.109	0.185	0.422	0.129	0.016	0.051	0.075	0.101	0.152	0.084	0.135	0.329	0.106	0.062	0.264	0.21	0.691
TCGA.55.A57B.01A.12R.A39D.07	0	0.1	0.118	0.017	0.089	0.108	0.309	0.06	0.109	0.173	0.369	0.064	0	0.15	0.098	0.197	0.075	0.115	0.209	0.296	0.127	0.055	0.271	0.163	0.727
TCGA.62.8394.01A.11R.2326.07	0	0.079	0.111	0.047	0.07	0.086	0.255	0.134	0.074	0.189	0.345	0.079	0.051	0.078	0.102	0.171	0.113	0.129	0.218	0.261	0.125	0.036	0.181	0.184	0.691
TCGA.62.8395.01A.11R.2326.07	0	0.034	0.123	0.041	0.093	0.086	0.24	0.033	0.108	0.227	0.355	0.09	0.015	0.096	0.124	0.15	0.12	0.122	0.212	0.245	0.118	0.072	0.241	0.15	0.68
TCGA.62.8397.01A.11R.2326.07	0	0.068	0.088	0.059	0.135	0.075	0.289	0	0.104	0.184	0.246	0.029	0.066	0.088	0.116	0.247	0.082	0.166	0.243	0.221	0.192	0.012	0.228	0.123	0.752
TCGA.62.8398.01A.11R.2326.07	0	0.065	0.11	0.094	0.099	0.17	0.331	0.117	0.012	0.18	0.318	0.118	0.019	0.044	0.138	0.192	0.062	0.181	0.228	0.222	0.149	0.005	0.177	0.186	0.699
TCGA.62.8399.01A.21R.2326.07	0	0.104	0.156	0.045	0.113	0.135	0.299	0.042	0.016	0.089	0.35	0.102	0	0.098	0.038	0.123	0.088	0.159	0.213	0.391	0.179	0.07	0.125	0.181	0.729
TCGA.62.8402.01A.11R.2326.07	0	0.002	0.229	0.115	0.092	0.123	0.316	0.247	0.045	0.075	0.357	0.139	0.037	0.004	0.051	0.2	0.09	0.158	0.214	0.341	0.156	0.104	0.172	0.219	0.775
TCGA.62.A46O.01A.11R.A24H.07	0	0.048	0.025	0.049	0	0.179	0.283	0.113	0	0.212	0.116	0	0.068	0.02	0.049	0.115	0.173	0.141	0.05	0.179	0.216	0.071	0.104	0.137	0.558
TCGA.62.A46P.01A.11R.A24H.07	0	0.106	0.175	0.06	0.075	0.074	0.159	0.067	0.058	0.239	0.27	0.031	0.081	0	0.118	0.152	0.072	0.176	0.185	0.307	0.152	0.084	0.177	0.162	0.692
TCGA.62.A46R.01A.11R.A24H.07	0	0.115	0.154	0.045	0.139	0.128	0.331	0.065	0.012	0.12	0.322	0.129	0.053	0	0.031	0.238	0.109	0.158	0.239	0.225	0.158	0.039	0.247	0.224	0.799
TCGA.62.A46S.01A.11R.A24H.07	0	0.067	0.181	0.048	0.08	0.158	0.283	0.116	0.097	0.16	0.405	0.087	0.008	0.048	0.139	0.152	0.064	0.138	0.247	0.32	0.136	0.041	0.214	0.209	0.74
TCGA.62.A46U.01A.11R.A24H.07	0	0	0.237	0.141	0.082	0.117	0.322	0.204	0.037	0.091	0.358	0.09	0.024	0.034	0.138	0.304	0.121	0.13	0.28	0.356	0.11	0.058	0.2	0.187	0.844
TCGA.62.A46V.01A.11R.A24H.07	0	0.098	0.071	0.083	0.106	0.071	0.235	0.044	0.016	0.18	0.194	0.042	0.054	0.09	0.098	0.271	0.067	0.158	0.257	0.212	0.133	0.022	0.262	0.109	0.735
TCGA.62.A46Y.01A.11R.A24H.07	0	0.058	0.177	0.101	0.077	0.046	0.271	0.16	0.114	0.136	0.348	0.074	0.052	0.071	0.098	0.207	0.09	0.145	0.285	0.295	0.132	0.05	0.252	0.188	0.797
TCGA.62.A470.01A.11R.A24H.07	0	0.083	0.117	0.04	0.096	0.143	0.246	0.095	0.038	0.183	0.213	0.002	0.043	0.035	0.145	0.287	0.092	0.226	0.312	0.304	0.159	0	0.13	0.099	0.805
TCGA.62.A471.01A.12R.A24H.07	0	0.027	0.178	0.111	0.005	0.135	0.26	0.224	0.091	0.197	0.27	0.014	0.086	0	0.152	0.06	0.098	0.118	0.066	0.353	0.174	0.061	0.113	0.227	0.605
TCGA.62.A472.01A.11R.A24H.07	0	0.075	0.185	0.128	0.051	0.086	0.243	0.209	0.067	0.1	0.356	0.067	0.076	0.039	0.081	0.197	0.074	0.109	0.201	0.278	0.124	0.078	0.23	0.206	0.709
TCGA.64.1676.01A.01R.0946.07	0	0.043	0.191	0.139	0.06	0.127	0.28	0.151	0	0.159	0.301	0	0.082	0.032	0.146	0.245	0.079	0.199	0.362	0.23	0.116	0.087	0.109	0.236	0.788
TCGA.64.1677.01A.01R.0946.07	0.007	0.055	0.215	0.161	0.08	0.138	0.234	0.213	0.072	0.104	0.342	0.141	0.077	0.008	0.048	0.122	0.153	0.105	0.085	0.337	0.088	0.04	0.187	0.239	0.658
TCGA.64.1678.01A.01R.0946.07	0	0.079	0.107	0.083	0.022	0.145	0.262	0.087	0.055	0.187	0.18	0.028	0.103	0.062	0.085	0.106	0.128	0.126	0.056	0.234	0.162	0.062	0.062	0.229	0.551
TCGA.64.1679.01A.21R.2066.07	0	0.079	0.106	0.063	0.126	0.096	0.26	0.016	0.101	0.177	0.128	0.045	0	0.126	0.033	0.248	0.114	0.232	0.35	0.061	0.16	0	0.15	0.114	0.715
TCGA.64.1680.01A.02R.0946.07	0.028	0.044	0.133	0.065	0.062	0.076	0.169	0.082	0.088	0.224	0.308	0.089	0.067	0	0.093	0.121	0.079	0.084	0.168	0.22	0.157	0.078	0.187	0.178	0.597
TCGA.64.1681.01A.11R.2066.07	0	0.105	0.101	0.038	0.092	0.077	0.146	0.051	0.168	0.19	0.33	0.097	0	0.114	0.137	0.221	0.113	0.1	0.216	0.163	0.119	0.063	0.224	0.19	0.673
TCGA.64.5774.01A.01R.1628.07	0	0.042	0.099	0.071	0.121	0.201	0.224	0.097	0	0.194	0.271	0.112	0.062	0	0.095	0.09	0.124	0.122	0.092	0.193	0.201	0.005	0.161	0.252	0.618
TCGA.64.5775.01A.01R.1628.07	0	0.048	0.218	0.019	0.111	0.144	0.314	0.164	0	0.103	0	0	0	0.081	0.085	0.298	0.07	0.237	0.36	0.154	0.189	0.045	0	0.116	0.712
TCGA.64.5778.01A.01R.1628.07	0	0.051	0.221	0.148	0.059	0.13	0.29	0.201	0.087	0.126	0.44	0.1	0.038	0	0.037	0.157	0.146	0.018	0.215	0.325	0.035	0.095	0.194	0.332	0.711
TCGA.64.5779.01A.01R.1628.07	0	0.087	0.211	0.019	0.179	0.117	0.328	0.073	0.101	0.149	0.417	0.171	0	0	0.096	0.049	0.17	0.089	0	0.237	0.098	0.065	0.256	0.237	0.568
TCGA.64.5781.01A.01R.1628.07	0	0.018	0.277	0.161	0.034	0.152	0.23	0.204	0.124	0.088	0.459	0.119	0.037	0	0.09	0.115	0.092	0.105	0.106	0.424	0.074	0.084	0.091	0.322	0.665
TCGA.64.5815.01A.01R.1628.07	0	0.054	0.13	0.037	0.106	0.104	0.295	0	0.114	0.17	0.312	0.112	0.007	0.118	0.136	0.309	0.1	0.188	0.303	0.227	0.111	0.032	0.189	0.176	0.801
TCGA.67.3770.01A.01R.0946.07	0	0.041	0.129	0.07	0.085	0.138	0.281	0.124	0.097	0.142	0.404	0.074	0.059	0.04	0.148	0.269	0.063	0.064	0.283	0.292	0.09	0.072	0.188	0.223	0.736
TCGA.67.3771.01A.01R.0946.07	0	0.045	0.172	0.1	0.079	0.085	0.326	0.184	0.091	0.112	0.358	0.088	0.017	0.092	0.112	0.159	0.119	0.132	0.239	0.354	0.088	0.064	0.161	0.234	0.743
TCGA.67.3772.01A.01R.0946.07	0	0.054	0.132	0.092	0.099	0.116	0.225	0.016	0.148	0.159	0.385	0.131	0.023	0.055	0.148	0.283	0.096	0.113	0.228	0.279	0.095	0.07	0.157	0.24	0.746
TCGA.67.3773.01A.01R.0946.07	0	0.079	0.145	0.07	0.079	0.124	0.287	0.099	0.09	0.162	0.419	0.047	0.063	0.064	0.133	0.245	0.076	0.05	0.257	0.292	0.077	0.084	0.207	0.249	0.727
TCGA.67.3774.01A.01R.0946.07	0	0.023	0.222	0.052	0.092	0.101	0.282	0.102	0.103	0.183	0.453	0.105	0.004	0.059	0.128	0.17	0.076	0.14	0.21	0.335	0.09	0.048	0.24	0.205	0.734
TCGA.67.4679.01B.01R.1755.07	0	0.053	0.123	0.033	0.095	0.076	0.25	0	0.129	0.179	0.381	0.068	0	0.122	0.128	0.204	0.084	0.158	0.235	0.279	0.162	0.106	0.246	0.198	0.784
TCGA.67.6215.01A.11R.1755.07	0	0.066	0.095	0.043	0.102	0.128	0.263	0.079	0.126	0.221	0.191	0.024	0.049	0.03	0.114	0.277	0.088	0.189	0.312	0.167	0.186	0.025	0.191	0.102	0.757
TCGA.67.6216.01A.11R.1755.07	0	0.059	0.193	0.067	0.086	0.082	0.307	0.081	0.12	0.175	0.377	0.092	0.031	0	0.065	0.193	0.112	0.188	0.272	0.284	0.103	0.039	0.238	0.189	0.79
TCGA.67.6217.01A.11R.1755.07	0	0.079	0.205	0.077	0.121	0.07	0.325	0.15	0.103	0.168	0.421	0.115	0.011	0.03	0.033	0.197	0.112	0.037	0.178	0.325	0.091	0.036	0.256	0.215	0.705
TCGA.69.7760.01A.11R.2170.07	0	0.098	0.018	0.06	0.131	0.117	0.178	0.013	0.033	0.149	0.077	0.057	0.01	0.095	0.112	0.278	0.1	0.15	0.157	0.038	0.201	0	0.184	0.06	0.584
TCGA.69.7761.01A.11R.2170.07	0	0.05	0.206	0.122	0.155	0.104	0.335	0.195	0.071	0.091	0.39	0.156	0.034	0.028	0.075	0.166	0.141	0.155	0.202	0.317	0.071	0.037	0.195	0.227	0.737
TCGA.69.7763.01A.11R.2170.07	0	0.08	0.137	0.024	0.101	0.078	0.215	0.083	0.129	0.192	0.382	0.112	0	0.107	0.105	0.163	0.101	0.13	0.218	0.296	0.127	0.053	0.185	0.17	0.695
TCGA.69.7764.01A.11R.2170.07	0	0.109	0.173	0.018	0.118	0.093	0.251	0.115	0.131	0.181	0.405	0.149	0.027	0.016	0.074	0.137	0.107	0.054	0.046	0.287	0.075	0.118	0.228	0.235	0.585
TCGA.69.7765.01A.11R.2170.07	0	0.075	0.227	0.093	0.107	0.08	0.264	0.145	0.105	0.183	0.306	0.13	0.019	0.076	0.079	0.22	0.099	0.096	0.212	0.325	0.117	0.033	0.218	0.149	0.719
TCGA.69.7973.01A.11R.2187.07	0	0.107	0.121	0.054	0.088	0.217	0.286	0.08	0.026	0.204	0.259	0.091	0.013	0.025	0.148	0.124	0.108	0.146	0.183	0.227	0.163	0.03	0.158	0.233	0.671
TCGA.69.7974.01A.11R.2187.07	0	0.033	0.224	0.104	0.07	0.119	0.316	0.178	0.041	0.116	0.332	0.07	0.03	0.078	0.068	0.24	0.114	0.147	0.333	0.297	0.122	0.078	0.175	0.165	0.797
TCGA.69.7978.01A.11R.2187.07	0	0.025	0.27	0.109	0.105	0.119	0.318	0.186	0.068	0.114	0.328	0.124	0.029	0.079	0.091	0.239	0.101	0.166	0.288	0.325	0.091	0.05	0.181	0.22	0.806
TCGA.69.7979.01A.11R.2187.07	0	0.045	0.092	0.107	0	0.131	0.245	0.068	0.089	0.224	0.163	0.011	0.038	0.067	0.046	0.159	0.108	0.2	0.234	0.249	0.179	0.066	0.095	0.169	0.697
TCGA.69.7980.01A.11R.2187.07	0	0.074	0.189	0.113	0.064	0.071	0.308	0.186	0.12	0.118	0.394	0.11	0.038	0.031	0.027	0.134	0.088	0.118	0.26	0.337	0.104	0.069	0.208	0.212	0.731
TCGA.69.8253.01A.11R.2287.07	0	0.038	0.189	0.035	0.072	0.104	0.243	0.062	0.152	0.227	0.352	0.112	0.034	0.068	0.134	0.187	0.101	0.13	0.131	0.318	0.145	0	0.191	0.156	0.68
TCGA.69.8254.01A.11R.2287.07	0	0.049	0.182	0.052	0.11	0.076	0.33	0.111	0.076	0.149	0.419	0.103	0.018	0.046	0.11	0.159	0.076	0.15	0.173	0.286	0.09	0.08	0.232	0.233	0.7
TCGA.69.8255.01A.11R.2287.07	0	0.038	0.234	0.16	0.084	0.07	0.277	0.232	0.049	0.037	0.382	0.078	0.017	0.09	0.086	0.091	0.116	0.126	0.232	0.315	0.116	0.169	0.155	0.246	0.699
TCGA.69.8453.01A.12R.2326.07	0	0.055	0.223	0.09	0.065	0.092	0.268	0.128	0.051	0.162	0.426	0.088	0.004	0.117	0.111	0.231	0.069	0.119	0.332	0.325	0.097	0.079	0.194	0.212	0.79
TCGA.69.A59K.01A.11R.A262.07	0	0.043	0.186	0.072	0.156	0.14	0.31	0.143	0.088	0.106	0.348	0.096	0.009	0.057	0.103	0.197	0.106	0.111	0.183	0.312	0.104	0.083	0.182	0.215	0.705
TCGA.71.6725.01A.11R.1858.07	0.032	0.063	0.013	0.045	0.061	0	0	0	0	0.205	0	0.034	0	0.063	0	0.236	0.175	0.232	0.337	0.1	0.257	0.045	0.027	0	0.682
TCGA.71.8520.01A.11R.2403.07	0	0.068	0.122	0.086	0.149	0.122	0.271	0.062	0.014	0.202	0.151	0.076	0.013	0.038	0.061	0.202	0.076	0.173	0.219	0.214	0.161	0.052	0.23	0.124	0.699
TCGA.73.4658.01A.01R.1755.07	0	0.036	0.165	0.092	0.086	0.093	0.295	0.137	0.083	0.159	0.396	0.099	0.012	0.089	0.126	0.26	0.062	0.142	0.333	0.333	0.087	0.079	0.174	0.18	0.786
TCGA.73.4659.01A.01R.1206.07	0	0.076	0.104	0.05	0.094	0.184	0.278	0.017	0.075	0.224	0.22	0.046	0	0.109	0.104	0.26	0.107	0.2	0.327	0.274	0.158	0.023	0.144	0.137	0.805
TCGA.73.4662.01A.01R.1206.07	0	0.061	0.153	0.057	0.127	0.114	0.317	0.112	0.081	0.153	0.457	0.124	0.007	0.072	0.052	0.196	0.116	0.106	0.196	0.253	0.114	0.08	0.214	0.233	0.714
TCGA.73.4666.01A.01R.1206.07	0	0	0.251	0.135	0.064	0.126	0.323	0.23	0.045	0.116	0.332	0.113	0.022	0.015	0.097	0.238	0.091	0.128	0.284	0.346	0.117	0.123	0.115	0.23	0.775
TCGA.73.4668.01A.01R.1206.07	0	0	0.14	0.027	0.086	0.151	0.234	0.076	0.115	0.217	0.185	0.089	0.033	0.104	0.093	0.184	0.1	0.202	0.18	0.274	0.184	0.015	0.138	0.167	0.715
TCGA.73.4670.01A.01R.1206.07	0	0.029	0.075	0.109	0.084	0.169	0.288	0.119	0	0.205	0.087	0.054	0.083	0.066	0.093	0.225	0.08	0.219	0.279	0.184	0.184	0.04	0.058	0.154	0.692
TCGA.73.4675.01A.01R.1206.07	0	0.084	0.102	0.056	0.104	0.084	0.238	0.01	0.109	0.206	0.158	0.056	0	0.063	0.136	0.317	0.062	0.204	0.254	0.233	0.157	0.043	0.19	0.144	0.781
TCGA.73.4676.01A.01R.1755.07	0	0.058	0.132	0.071	0.065	0.09	0.236	0.071	0.168	0.202	0.146	0.08	0	0.052	0.128	0.243	0.078	0.179	0.314	0.355	0.17	0.05	0.064	0.116	0.76
TCGA.73.4676.11A.01R.1755.07	0	0.012	0.28	0.017	0	0.009	0.139	0.043	0.163	0.111	0.421	0.026	0	0.174	0.237	0.251	0.048	0.124	0.351	0.465	0.166	0.143	0.078	0.227	0.856
TCGA.73.4677.01A.01R.1206.07	0	0.075	0.14	0.049	0.096	0.11	0.283	0.053	0.106	0.229	0.421	0.119	0.007	0.006	0.121	0.233	0.078	0.084	0.193	0.299	0.121	0.075	0.168	0.187	0.682
TCGA.73.7498.01A.12R.2187.07	0	0.081	0.142	0.034	0.095	0.068	0.294	0.085	0.115	0.176	0.39	0.111	0	0.128	0.102	0.142	0.106	0.132	0.154	0.335	0.145	0.072	0.209	0.21	0.717
TCGA.73.7499.01A.11R.2187.07	0	0.065	0.189	0.138	0.06	0.092	0.292	0.219	0.073	0.126	0.373	0.129	0.066	0.02	0.099	0.205	0.123	0.104	0.238	0.303	0.061	0.085	0.144	0.272	0.726
TCGA.73.A9RS.01A.11R.A41B.07	0	0.098	0.133	0.067	0.062	0.143	0.332	0.179	0.016	0.164	0.258	0.082	0.072	0	0.021	0.111	0.11	0.205	0.163	0.217	0.157	0.032	0.138	0.172	0.636
TCGA.75.5122.01A.01R.1755.07	0	0	0.261	0.151	0.079	0.117	0.319	0.182	0.071	0.038	0.403	0.063	0	0.035	0.132	0.294	0.092	0.159	0.401	0.315	0.071	0.127	0.157	0.259	0.875
TCGA.75.5125.01A.01R.1755.07	0	0.007	0.301	0.125	0.112	0.151	0.301	0.228	0	0.095	0.306	0.102	0.046	0.017	0.058	0.217	0.098	0.151	0.28	0.248	0.12	0.06	0.211	0.183	0.755
TCGA.75.5126.01A.01R.1755.07	0	0.054	0.211	0.114	0.044	0.078	0.284	0.185	0.015	0.119	0.311	0.089	0.019	0.123	0.107	0.266	0.104	0.174	0.385	0.284	0.158	0.064	0.111	0.144	0.813
TCGA.75.5146.01A.01R.1628.07	0.017	0.061	0.136	0.057	0.097	0.086	0.238	0.054	0.181	0.192	0.441	0.113	0.03	0.031	0.134	0.157	0.137	0.099	0.19	0.32	0.089	0.036	0.199	0.214	0.702
TCGA.75.5147.01A.01R.1628.07	0	0.089	0.122	0.068	0.138	0.111	0.297	0.054	0.156	0.107	0.369	0.116	0.069	0.03	0.076	0.208	0.143	0.126	0.278	0.257	0.09	0.051	0.191	0.203	0.748
TCGA.75.6203.01A.11R.1755.07	0	0.03	0.232	0.05	0.074	0.035	0.276	0.126	0.099	0.161	0.357	0.043	0	0.176	0.154	0.275	0.074	0.134	0.365	0.335	0.134	0.105	0.154	0.186	0.829
TCGA.75.6205.01A.11R.1755.07	0	0.038	0.241	0.074	0.114	0.091	0.333	0.158	0.07	0.084	0.375	0.115	0	0.079	0.129	0.214	0.13	0.138	0.344	0.341	0.107	0.057	0.199	0.198	0.836
TCGA.75.6206.01A.11R.1755.07	0	0.056	0.132	0.081	0.11	0.132	0.296	0.043	0.008	0.203	0.306	0.079	0.006	0.07	0.05	0.268	0.072	0.17	0.316	0.225	0.156	0.01	0.165	0.124	0.748
TCGA.75.6207.01A.11R.1755.07	0.002	0.078	0.135	0.009	0.134	0.127	0.268	0.057	0.038	0.141	0.21	0.138	0.014	0.056	0.07	0.252	0.076	0.175	0.291	0.132	0.181	0.029	0.118	0.15	0.688
TCGA.75.6211.01A.11R.1755.07	0	0.064	0.117	0.079	0.122	0.17	0.302	0.141	0.038	0.168	0.293	0.129	0.037	0	0.11	0.137	0.101	0.147	0.136	0.27	0.137	0.065	0.126	0.239	0.647
TCGA.75.6212.01A.11R.1755.07	0	0.076	0.124	0.043	0.107	0.073	0.29	0.059	0.146	0.194	0.34	0.068	0	0.04	0.14	0.277	0.198	0.082	0.249	0.236	0.091	0.053	0.258	0.158	0.775
TCGA.75.6214.01A.41R.1949.07	0	0.1	0.127	0.082	0.074	0.132	0.278	0.035	0.036	0.166	0.142	0.036	0.084	0.092	0.02	0.188	0.039	0.196	0.163	0.192	0.228	0.033	0.078	0.129	0.607
TCGA.75.7025.01A.12R.1949.07	0	0.096	0.163	0.043	0.091	0.07	0.291	0.05	0.098	0.161	0.393	0.117	0	0.096	0.099	0.165	0.141	0.13	0.157	0.315	0.109	0.063	0.294	0.206	0.759
TCGA.75.7027.01A.11R.1949.07	0	0.043	0.138	0.074	0.103	0.171	0.318	0.105	0.053	0.197	0.234	0.117	0.027	0	0.133	0.18	0.086	0.2	0.193	0.245	0.139	0.014	0.16	0.163	0.684
TCGA.75.7030.01A.11R.1949.07	0	0.065	0.162	0.007	0.101	0.095	0.288	0.043	0.121	0.185	0.431	0.15	0	0.109	0.125	0.129	0.115	0.1	0.09	0.348	0.074	0.103	0.252	0.234	0.671
TCGA.75.7031.01A.11R.1949.07	0	0.059	0.186	0.079	0.056	0.113	0.294	0.145	0.03	0.17	0.387	0.096	0.038	0.061	0.089	0.201	0.055	0.163	0.245	0.322	0.117	0.04	0.161	0.227	0.746
TCGA.78.7143.01A.11R.2039.07	0	0.104	0.059	0.04	0.101	0.103	0.288	0.029	0.082	0.161	0.323	0.116	0.025	0.085	0.097	0.265	0.116	0.173	0.248	0.186	0.129	0.023	0.246	0.156	0.76
TCGA.78.7145.01A.11R.2039.07	0	0.132	0.06	0.073	0.125	0.111	0.267	0.02	0.041	0.171	0.215	0.043	0.025	0.061	0.089	0.283	0.106	0.185	0.285	0.103	0.204	0	0.161	0.115	0.722
TCGA.78.7146.01A.11R.2039.07	0	0.03	0.171	0.112	0.061	0.139	0.275	0.245	0.078	0.184	0.148	0.052	0.06	0.004	0.074	0.237	0.078	0.169	0.235	0.244	0.179	0.048	0.08	0.13	0.676
TCGA.78.7147.01A.11R.2039.07	0	0.092	0.147	0.091	0.06	0.07	0.229	0.167	0.086	0.17	0.312	0.042	0.069	0.057	0.075	0.212	0.119	0.073	0.197	0.268	0.135	0.046	0.188	0.217	0.704
TCGA.78.7148.01A.11R.2039.07	0	0.077	0.222	0.098	0.079	0.131	0.281	0.158	0.025	0.178	0.344	0.109	0.011	0.017	0.136	0.151	0.092	0.104	0.16	0.317	0.126	0.055	0.12	0.215	0.643
TCGA.78.7149.01A.11R.2039.07	0	0.085	0.181	0.093	0.058	0.038	0.13	0.152	0.08	0.203	0.326	0.065	0.048	0.047	0.16	0.076	0.123	0.067	0.03	0.366	0.138	0.104	0.186	0.218	0.603
TCGA.78.7150.01A.21R.2039.07	0	0.07	0.139	0.124	0.045	0.132	0.291	0.17	0.079	0.218	0.209	0.076	0.054	0	0.104	0.162	0.087	0.206	0.154	0.32	0.178	0	0.057	0.184	0.674
TCGA.78.7152.01A.11R.2039.07	0	0.044	0.177	0.093	0.104	0.101	0.291	0.102	0.076	0.171	0.405	0.095	0	0.047	0.085	0.165	0.13	0.103	0.189	0.264	0.1	0.078	0.175	0.245	0.686
TCGA.78.7153.01A.11R.2039.07	0	0.062	0.157	0.067	0.093	0.089	0.179	0.099	0.136	0.188	0.321	0.087	0.045	0	0.141	0.155	0.125	0.105	0.16	0.309	0.111	0.097	0.168	0.216	0.674
TCGA.78.7154.01A.11R.2039.07	0	0.083	0.135	0.052	0.05	0.1	0.206	0.08	0.122	0.132	0.34	0.147	0.047	0.08	0.161	0.19	0.099	0.109	0.185	0.355	0.15	0.028	0.125	0.173	0.693
TCGA.78.7155.01A.11R.2039.07	0	0.076	0.169	0.099	0.102	0.13	0.307	0.17	0.042	0	0.243	0.016	0.078	0.012	0	0.211	0.089	0.111	0.2	0.284	0.175	0.118	0.162	0.231	0.732
TCGA.78.7156.01A.11R.2039.07	0	0.062	0.126	0.083	0	0.083	0.216	0.132	0.063	0.192	0.296	0.103	0.064	0.039	0.101	0.098	0.059	0.09	0.033	0.31	0.157	0.144	0.211	0.195	0.577
TCGA.78.7158.01A.11R.2039.07	0	0.097	0.086	0.03	0.168	0.097	0.279	0.057	0.088	0.154	0.208	0.052	0.072	0.022	0.136	0.192	0.073	0.167	0.211	0.151	0.197	0.036	0.165	0.159	0.657
TCGA.78.7159.01A.11R.2039.07	0	0.053	0.154	0.085	0.119	0.188	0.269	0.157	0.028	0.187	0.29	0.129	0.091	0	0.053	0.123	0.119	0.117	0.153	0.25	0.182	0.043	0.179	0.251	0.687
TCGA.78.7160.01A.11R.2039.07	0	0.028	0.18	0.109	0.086	0.177	0.325	0.187	0.088	0.145	0.401	0.137	0	0.032	0.104	0.186	0.089	0.114	0.26	0.326	0.102	0.036	0.162	0.259	0.749
TCGA.78.7161.01A.11R.2039.07	0	0.066	0.151	0.048	0.054	0.188	0.189	0.072	0.091	0.281	0.302	0.05	0.058	0.018	0.087	0.094	0.052	0.12	0.104	0.303	0.186	0.016	0.185	0.215	0.63
TCGA.78.7162.01A.21R.2066.07	0	0.067	0.21	0.087	0.081	0.054	0.267	0.136	0.131	0.165	0.417	0.112	0.034	0.05	0.111	0.197	0.106	0.052	0.138	0.394	0.075	0.103	0.187	0.222	0.685
TCGA.78.7163.01A.12R.2066.07	0	0	0.16	0.036	0	0.12	0.179	0.123	0.139	0.218	0.285	0.058	0.078	0.026	0.098	0.064	0.154	0.071	0.008	0.285	0.146	0.102	0.208	0.201	0.569
TCGA.78.7166.01A.12R.2066.07	0	0.03	0.217	0.109	0.046	0.091	0.184	0.2	0.131	0.185	0.35	0.058	0.087	0.028	0.126	0.084	0.139	0.128	0.036	0.377	0.126	0.059	0.206	0.202	0.65
TCGA.78.7167.01A.11R.2066.07	0.008	0.093	0.151	0.058	0.058	0.091	0.202	0.124	0.085	0.22	0.26	0.081	0.074	0.039	0.092	0.116	0.065	0.117	0.077	0.307	0.15	0.075	0.183	0.192	0.603
TCGA.78.7220.01A.11R.2039.07	0	0.091	0.109	0.105	0.024	0.146	0.266	0.169	0.008	0.239	0.25	0.089	0.06	0	0.136	0.182	0.053	0.162	0.156	0.26	0.187	0.039	0.092	0.162	0.627
TCGA.78.7535.01A.11R.2066.07	0	0.075	0.141	0.083	0.084	0.056	0.177	0	0.055	0.19	0.124	0	0.06	0.099	0.083	0.22	0.143	0.242	0.34	0.249	0.193	0.043	0.124	0.149	0.83
TCGA.78.7536.01A.11R.2066.07	0	0.056	0.132	0.121	0.059	0.123	0.299	0.217	0	0.132	0.29	0.09	0.068	0.048	0.083	0.136	0.092	0.207	0.299	0.201	0.156	0.061	0.096	0.173	0.68
TCGA.78.7537.01A.11R.2066.07	0	0.085	0.109	0.063	0.094	0.109	0.314	0.054	0.088	0.233	0.321	0.076	0.04	0	0.14	0.223	0.1	0.119	0.136	0.237	0.085	0.066	0.203	0.208	0.656
TCGA.78.7539.01A.11R.2066.07	0	0.049	0.203	0.12	0.084	0.073	0.264	0.18	0.122	0.142	0.422	0.087	0.061	0.02	0.055	0.197	0.064	0.101	0.235	0.347	0.114	0.061	0.209	0.266	0.767
TCGA.78.7540.01A.11R.2066.07	0	0.06	0.16	0.051	0.052	0.088	0.193	0.076	0.099	0.262	0.178	0.046	0.065	0.104	0.103	0.243	0.104	0.124	0.24	0.288	0.136	0.027	0.164	0.144	0.721
TCGA.78.7542.01A.21R.2066.07	0	0.049	0.184	0.111	0.061	0.154	0.314	0.214	0.024	0.204	0.111	0.049	0.126	0.004	0.058	0.23	0.089	0.181	0.174	0.247	0.159	0.016	0.117	0.146	0.672
TCGA.78.7633.01A.11R.2066.07	0	0.091	0.12	0.062	0.074	0.112	0.224	0.06	0.09	0.198	0.228	0.063	0.051	0	0.103	0.183	0.089	0.103	0.119	0.278	0.178	0.069	0.155	0.129	0.617
TCGA.78.8640.01A.11R.2403.07	0	0.03	0.184	0.101	0.096	0.091	0.216	0.211	0.057	0.133	0.308	0.058	0.092	0.023	0.096	0.187	0.124	0.17	0.242	0.298	0.159	0.086	0.081	0.223	0.742
TCGA.78.8648.01A.11R.2403.07	0	0.038	0.27	0.119	0.121	0.053	0.313	0.147	0.084	0.107	0.44	0.108	0	0.012	0.102	0.21	0.112	0.167	0.341	0.355	0.058	0.097	0.201	0.216	0.83
TCGA.78.8655.01A.11R.2403.07	0	0.063	0.181	0.089	0.066	0.079	0.298	0.148	0.078	0.158	0.351	0.112	0.031	0.024	0.075	0.208	0.105	0.148	0.295	0.291	0.131	0.08	0.176	0.219	0.786
TCGA.78.8660.01A.11R.2403.07	0	0.039	0.229	0.127	0.073	0.084	0.285	0.226	0.081	0.132	0.389	0.079	0.022	0.031	0.112	0.227	0.085	0.104	0.265	0.394	0.091	0.083	0.171	0.241	0.789
TCGA.78.8662.01A.11R.2403.07	0	0.102	0.095	0.075	0.052	0.083	0.202	0	0.131	0.107	0.285	0.014	0.082	0.042	0.06	0.125	0.101	0.112	0.14	0.289	0.182	0.066	0.137	0.204	0.645
TCGA.80.5607.01A.31R.1949.07	0	0.056	0.185	0.079	0.074	0.08	0.318	0.081	0.084	0.175	0.459	0.134	0	0.024	0.097	0.182	0.058	0.151	0.193	0.303	0.104	0.092	0.199	0.19	0.691
TCGA.80.5608.01A.31R.1949.07	0	0.054	0.199	0.044	0.044	0.173	0.268	0.112	0.059	0.234	0.335	0.061	0.017	0.035	0.13	0.146	0.051	0.197	0.183	0.309	0.167	0.056	0.134	0.236	0.712
TCGA.80.5611.01A.01R.1628.07	0	0.04	0.191	0.087	0.055	0.151	0.235	0.177	0.029	0.151	0.341	0.093	0.072	0.028	0.058	0.192	0.121	0.174	0.345	0.279	0.141	0.057	0.094	0.212	0.779
TCGA.83.5908.01A.21R.2287.07	0	0.007	0.268	0.149	0.05	0.138	0.349	0.242	0.073	0.088	0.395	0.136	0.022	0	0.034	0.158	0.1	0.1	0.199	0.362	0.088	0.095	0.187	0.237	0.716
TCGA.86.6562.01A.11R.1755.07	0	0.069	0.139	0.082	0.11	0.086	0.239	0.064	0.076	0.191	0.343	0.145	0	0.027	0.067	0.194	0.101	0.189	0.289	0.254	0.149	0.026	0.132	0.171	0.74
TCGA.86.6851.01A.11R.1949.07	0	0.033	0.292	0.144	0.147	0.099	0.346	0.19	0.068	0.097	0.373	0.118	0.013	0.022	0	0.122	0.141	0.164	0.212	0.377	0.087	0.062	0.224	0.24	0.784
TCGA.86.7701.01A.11R.2170.07	0	0.058	0.214	0.098	0.153	0.165	0.302	0.202	0	0.114	0.354	0.174	0.024	0.032	0.13	0.131	0.156	0.078	0.144	0.294	0.081	0.052	0.186	0.25	0.66
TCGA.86.7711.01A.11R.2066.07	0	0.013	0.132	0.121	0.065	0.155	0.342	0.147	0	0.161	0.138	0.079	0.006	0.141	0.07	0.175	0.09	0.214	0.357	0.274	0.227	0	0.051	0.099	0.743
TCGA.86.7713.01A.11R.2066.07	0	0.098	0.098	0.031	0.123	0.214	0.277	0.072	0	0.2	0.271	0.106	0.014	0	0.032	0.159	0.106	0.173	0.212	0.108	0.197	0.034	0.193	0.173	0.661
TCGA.86.7714.01A.12R.2170.07	0.039	0.059	0.108	0	0.052	0.09	0.253	0.027	0	0.227	0.245	0.063	0	0.105	0.112	0.326	0.084	0.177	0.234	0.158	0.168	0.039	0.188	0.113	0.724
TCGA.86.7953.01A.11R.2187.07	0	0.066	0.148	0.075	0.112	0.115	0.326	0.022	0.013	0.165	0.418	0.123	0	0.042	0.033	0.18	0.172	0.214	0.316	0.214	0.15	0.046	0.192	0.18	0.809
TCGA.86.7954.01A.11R.2187.07	0	0.047	0.178	0.119	0.103	0.097	0.285	0.208	0.068	0.052	0.333	0.121	0.027	0.108	0.066	0.183	0.133	0.167	0.306	0.244	0.137	0.049	0.193	0.201	0.782
TCGA.86.7955.01A.11R.2187.07	0	0.077	0.067	0.059	0	0.193	0.221	0.114	0.023	0.108	0.216	0.052	0.122	0.024	0.047	0.079	0.161	0.112	0.031	0.19	0.198	0.063	0.129	0.183	0.542
TCGA.86.8054.01A.11R.2241.07	0	0.156	0.145	0.018	0.077	0.169	0.289	0.099	0.037	0.162	0.256	0.101	0.041	0.03	0.055	0.21	0.084	0.137	0.215	0.156	0.208	0	0.11	0.161	0.641
TCGA.86.8055.01A.11R.2241.07	0	0.09	0.128	0.053	0.125	0.151	0.308	0.053	0.132	0.124	0.299	0.119	0.023	0.058	0.079	0.208	0.118	0.195	0.268	0.266	0.149	0.032	0.165	0.182	0.775
TCGA.86.8056.01A.11R.2241.07	0.001	0.088	0.137	0.039	0.098	0.096	0.323	0.043	0.13	0.18	0.351	0.107	0.008	0.071	0.062	0.169	0.119	0.168	0.259	0.315	0.136	0.044	0.214	0.149	0.765
TCGA.86.8073.01A.11R.2241.07	0	0.086	0.117	0.064	0.1	0.077	0.257	0.082	0.136	0.164	0.298	0.066	0.055	0.025	0.072	0.165	0.103	0.173	0.299	0.403	0.149	0.043	0.179	0.145	0.808
TCGA.86.8074.01A.11R.2241.07	0	0.093	0.142	0.09	0.096	0.114	0.344	0.146	0.148	0.145	0.254	0.083	0.07	0.031	0.035	0.216	0.091	0.174	0.27	0.234	0.124	0.009	0.178	0.138	0.712
TCGA.86.8075.01A.11R.2241.07	0	0.094	0.127	0.073	0.129	0.115	0.324	0.032	0.114	0.161	0.298	0.082	0.006	0.063	0.021	0.188	0.13	0.183	0.33	0.252	0.13	0.006	0.173	0.165	0.775
TCGA.86.8076.01A.31R.2241.07	0	0.054	0.2	0.124	0.101	0.151	0.305	0.193	0.098	0.136	0.419	0.135	0.017	0	0.102	0.168	0.101	0.117	0.145	0.347	0.071	0.05	0.206	0.294	0.724
TCGA.86.8278.01A.11R.2287.07	0	0.082	0.226	0.096	0.1	0.086	0.256	0.13	0.106	0.221	0.267	0.113	0.011	0.07	0.064	0.171	0.087	0.2	0.232	0.324	0.114	0.024	0.192	0.146	0.733
TCGA.86.8279.01A.11R.2287.07	0.03	0.129	0.024	0.083	0.075	0.08	0.203	0	0.11	0.204	0.132	0	0.042	0.069	0.046	0.281	0.11	0.224	0.236	0.171	0.185	0.011	0.168	0.103	0.739
TCGA.86.8280.01A.11R.2287.07	0	0.095	0.171	0.091	0.136	0.07	0.285	0.169	0.11	0.082	0.399	0.11	0.013	0.083	0.107	0.169	0.123	0.094	0.202	0.323	0.082	0.071	0.242	0.215	0.725
TCGA.86.8281.01A.11R.2287.07	0	0.084	0.163	0.04	0.101	0.103	0.269	0.084	0.11	0.204	0.308	0.102	0.016	0.078	0.122	0.191	0.129	0.088	0.108	0.325	0.119	0.056	0.184	0.216	0.68
TCGA.86.8358.01A.11R.2326.07	0	0.092	0.217	0.074	0.082	0.134	0.299	0.125	0.131	0.106	0.278	0.056	0.026	0.024	0.147	0.126	0.127	0.134	0.144	0.329	0.142	0.065	0.16	0.183	0.673
TCGA.86.8359.01A.11R.2326.07	0	0.055	0.21	0.156	0.071	0.163	0.302	0.172	0.106	0.188	0.426	0.12	0.004	0.002	0.074	0	0.074	0.165	0.108	0.404	0.15	0.034	0.155	0.286	0.671
TCGA.86.8585.01A.11R.2403.07	0	0.044	0.248	0.108	0.088	0.137	0.248	0.172	0.068	0.071	0.444	0.124	0.021	0.062	0.075	0.166	0.098	0.152	0.225	0.343	0.108	0.057	0.196	0.243	0.766
TCGA.86.8668.01A.11R.2403.07	0	0.073	0.155	0.06	0.145	0.11	0.326	0.101	0.05	0.153	0.317	0.097	0.002	0.053	0.101	0.165	0.138	0.117	0.224	0.246	0.092	0.045	0.254	0.189	0.713
TCGA.86.8669.01A.11R.2403.07	0	0.032	0.15	0.059	0.133	0.134	0.353	0.062	0	0.182	0.393	0.125	0.008	0	0.132	0.218	0.104	0.176	0.209	0.294	0.126	0.057	0.215	0.203	0.773
TCGA.86.8671.01A.11R.2403.07	0	0.068	0.227	0.124	0.137	0.053	0.343	0.15	0.08	0.069	0.393	0.1	0.006	0.082	0.086	0.168	0.154	0.105	0.241	0.336	0.067	0.081	0.24	0.263	0.788
TCGA.86.8672.01A.21R.2403.07	0	0.01	0.247	0.163	0.065	0.131	0.317	0.207	0.1	0.106	0.371	0.06	0.047	0	0.083	0.205	0.098	0.212	0.226	0.383	0.097	0.06	0.147	0.227	0.798
TCGA.86.8673.01A.11R.2403.07	0	0.043	0.204	0.144	0.056	0.137	0.209	0.167	0.116	0.196	0.312	0.058	0.041	0	0.075	0.168	0.112	0.171	0.188	0.316	0.114	0.086	0.154	0.256	0.74
TCGA.86.8674.01A.21R.2403.07	0	0.041	0.057	0.103	0.014	0.127	0.152	0.132	0.135	0.234	0.29	0.03	0.078	0	0.116	0.086	0.12	0.153	0.014	0.299	0.176	0.05	0.101	0.228	0.588
TCGA.86.A456.01A.11R.A24H.07	0	0.017	0.174	0.079	0.088	0.047	0.254	0.07	0.101	0.136	0.407	0.096	0.03	0.095	0.092	0.228	0.071	0.108	0.311	0.414	0.153	0.05	0.235	0.143	0.831
TCGA.86.A4D0.01A.11R.A24H.07	0	0.119	0.175	0.092	0.084	0.154	0.317	0.139	0.01	0.115	0.249	0.093	0.074	0	0.079	0.203	0.11	0.104	0.182	0.264	0.168	0.07	0.148	0.17	0.675
TCGA.86.A4JF.01A.11R.A24X.07	0	0.027	0.233	0.11	0.053	0.096	0.243	0.197	0.056	0.154	0.319	0.077	0.041	0.031	0.11	0.221	0.084	0.182	0.271	0.303	0.144	0.069	0.139	0.198	0.771
TCGA.86.A4P7.01A.11R.A24X.07	0	0.079	0.195	0.086	0.1	0.035	0.273	0.128	0.132	0.126	0.434	0.08	0.005	0.098	0.095	0.169	0.119	0.121	0.264	0.332	0.1	0.093	0.213	0.201	0.759
TCGA.86.A4P8.01A.11R.A24X.07	0	0.028	0.237	0.046	0.107	0.012	0.276	0.1	0.094	0.108	0.473	0.086	0	0.124	0.2	0.202	0.07	0.102	0.269	0.37	0.105	0.096	0.25	0.198	0.783
TCGA.91.6828.01A.11R.1858.07	0	0.054	0.174	0.103	0.094	0.127	0.324	0.174	0.083	0.139	0.355	0.114	0.021	0.045	0.073	0.206	0.088	0.147	0.286	0.266	0.13	0.059	0.188	0.174	0.742
TCGA.91.6828.11A.01R.1858.07	0	0.023	0.228	0.035	0	0.019	0.217	0.052	0.125	0.174	0.375	0.062	0.001	0.174	0.127	0.147	0.035	0.125	0.268	0.395	0.226	0.085	0.177	0.133	0.753
TCGA.91.6829.01A.21R.1858.07	0	0.063	0.212	0.078	0.105	0.119	0.253	0.043	0.19	0.148	0.112	0.062	0.026	0.041	0.043	0.212	0.106	0.208	0.313	0.3	0.142	0.077	0.131	0.132	0.773
TCGA.91.6829.11A.01R.1858.07	0	0.047	0.2	0.028	0.01	0	0.154	0.082	0.105	0.124	0.25	0.017	0.037	0.198	0.162	0.301	0.089	0.2	0.399	0.309	0.21	0.072	0.143	0.15	0.9
TCGA.91.6830.01A.11R.1949.07	0	0.052	0.242	0.064	0.058	0.049	0.242	0.156	0.158	0.117	0.373	0.109	0.038	0.149	0.096	0.151	0.128	0.114	0.225	0.37	0.146	0.059	0.176	0.173	0.741
TCGA.91.6831.01A.11R.1858.07	0	0.051	0.193	0.093	0.127	0.143	0.281	0.143	0	0.13	0.265	0.113	0.011	0.095	0.043	0.179	0.121	0.227	0.284	0.185	0.156	0.072	0.125	0.175	0.726
TCGA.91.6831.11A.02R.1858.07	0	0.041	0.198	0.076	0.063	0.04	0.211	0.104	0.14	0.158	0.421	0.07	0.011	0.138	0.133	0.159	0.068	0.116	0.285	0.404	0.187	0.072	0.166	0.14	0.763
TCGA.91.6835.01A.11R.1858.07	0	0.059	0.187	0.094	0.119	0.079	0.352	0.154	0.078	0.107	0.415	0.144	0	0.008	0.082	0.16	0.176	0.055	0.268	0.303	0.056	0.086	0.235	0.25	0.751
TCGA.91.6835.11A.01R.1858.07	0	0.08	0.14	0.087	0.022	0.038	0.221	0.106	0.102	0.166	0.339	0.063	0.033	0.111	0.119	0.162	0.072	0.12	0.24	0.306	0.139	0.111	0.236	0.186	0.73
TCGA.91.6836.01A.21R.1858.07	0	0.059	0.202	0.13	0.097	0.134	0.321	0.223	0.035	0.195	0.135	0.069	0.068	0	0.034	0.21	0.122	0.119	0.161	0.23	0.172	0.035	0.113	0.139	0.634
TCGA.91.6836.11A.01R.1858.07	0	0	0.209	0.075	0.034	0.025	0.246	0.099	0.107	0.155	0.421	0.047	0.036	0.153	0.165	0.235	0.067	0.128	0.345	0.374	0.166	0.059	0.196	0.167	0.839
TCGA.91.6840.01A.11R.1949.07	0	0.117	0.189	0.083	0.103	0.067	0.265	0.107	0.081	0.019	0.379	0.119	0.019	0.083	0.119	0.121	0.145	0.061	0.16	0.318	0.117	0.048	0.234	0.242	0.699
TCGA.91.6847.01A.11R.1949.07	0	0.098	0.071	0.053	0	0.152	0.225	0.107	0.05	0.124	0.092	0	0.055	0.061	0.139	0.063	0.091	0.166	0.068	0.29	0.203	0.072	0.073	0.141	0.548
TCGA.91.6847.11A.01R.1949.07	0	0.052	0.122	0	0	0	0.163	0.067	0.112	0.194	0.322	0.019	0.019	0.214	0.174	0.144	0.046	0.147	0.273	0.345	0.219	0.092	0.181	0.124	0.739
TCGA.91.6848.01A.11R.1949.07	0	0.036	0.249	0.103	0.111	0.151	0.371	0.17	0.074	0.014	0.331	0.143	0	0.073	0.053	0.23	0.09	0.158	0.298	0.366	0.151	0.051	0.165	0.175	0.817
TCGA.91.6849.01A.11R.1949.07	0	0.02	0.238	0.067	0.121	0.082	0.307	0.068	0.095	0.173	0.422	0.089	0	0.054	0.096	0.198	0.111	0.107	0.266	0.4	0.107	0.103	0.159	0.2	0.774
TCGA.91.6849.11A.01R.1949.07	0	0.031	0.221	0.033	0.018	0.013	0.195	0.045	0.112	0.165	0.382	0.034	0.013	0.2	0.164	0.101	0.056	0.129	0.215	0.45	0.197	0.102	0.2	0.138	0.744
TCGA.91.7771.01A.11R.2170.07	0	0.076	0.165	0.096	0.104	0.105	0.289	0.155	0.118	0.159	0.409	0.126	0	0.079	0.1	0.189	0.105	0.124	0.248	0.316	0.04	0.056	0.198	0.221	0.72
TCGA.91.8496.01A.11R.2403.07	0	0.092	0.174	0.033	0.102	0.035	0.268	0.052	0.127	0.121	0.358	0.041	0.017	0.149	0.195	0.231	0.08	0.13	0.304	0.315	0.179	0.061	0.148	0.182	0.785
TCGA.91.8497.01A.11R.2403.07	0	0.061	0.15	0.037	0.13	0.059	0.316	0.058	0.087	0.151	0.411	0.101	0	0.107	0.147	0.212	0.2	0.1	0.181	0.293	0.095	0.07	0.246	0.221	0.774
TCGA.91.8499.01A.11R.2403.07	0	0.082	0.172	0.136	0.077	0.067	0.273	0.162	0.047	0	0.328	0.117	0.105	0.021	0.066	0.2	0.076	0.117	0.229	0.191	0.186	0.089	0.148	0.176	0.662
TCGA.91.A4BC.01A.11R.A24H.07	0	0.029	0.251	0.164	0.107	0.086	0.267	0.225	0.085	0.081	0.411	0.098	0.063	0	0.071	0.116	0.103	0.187	0.211	0.331	0.065	0.12	0.191	0.28	0.742
TCGA.91.A4BD.01A.11R.A24H.07	0	0.027	0.207	0.095	0.052	0.041	0.202	0.161	0.085	0.143	0.371	0	0.067	0.03	0.174	0.248	0.077	0.185	0.314	0.316	0.17	0.054	0.225	0.202	0.869
TCGA.93.7347.01A.11R.2187.07	0	0.063	0.199	0.093	0.126	0.082	0.331	0.138	0.105	0.102	0.411	0.126	0	0.064	0.106	0.215	0.103	0.106	0.225	0.329	0.092	0.069	0.238	0.248	0.778
TCGA.93.7348.01A.21R.2039.07	0	0.091	0.156	0.077	0.13	0.089	0.274	0.042	0.13	0.176	0.399	0.148	0	0.03	0.08	0.146	0.126	0.117	0.113	0.346	0.107	0.041	0.243	0.179	0.689
TCGA.93.8067.01A.11R.2287.07	0	0.07	0.206	0.064	0.067	0.135	0.305	0.164	0.058	0.183	0.237	0.048	0.042	0.045	0.097	0.221	0.074	0.153	0.188	0.323	0.15	0.047	0.127	0.175	0.705
TCGA.93.A4JN.01A.11R.A24X.07	0	0.108	0.11	0.067	0.149	0.102	0.313	0.043	0.111	0.14	0.361	0.098	0.008	0.07	0.07	0.105	0.203	0.133	0.118	0.243	0.116	0.038	0.225	0.197	0.67
TCGA.93.A4JO.01A.21R.A24X.07	0	0.057	0.204	0.116	0.085	0.062	0.261	0.152	0.11	0.144	0.408	0.115	0	0.086	0.068	0.17	0.114	0.14	0.233	0.337	0.105	0.047	0.246	0.241	0.793
TCGA.93.A4JP.01A.11R.A24X.07	0	0.077	0.11	0.085	0.043	0.049	0.268	0.077	0.127	0.134	0.268	0.034	0.036	0.176	0.097	0.196	0.094	0.155	0.292	0.309	0.176	0.044	0.157	0.112	0.746
TCGA.93.A4JQ.01A.11R.A24X.07	0	0.071	0.197	0.116	0.093	0.097	0.303	0.189	0.112	0.082	0.406	0.125	0.019	0.043	0.11	0.109	0.176	0.085	0.131	0.333	0.053	0.044	0.279	0.229	0.698
TCGA.95.7039.01A.11R.1949.07	0	0.102	0.186	0.023	0.08	0.092	0.278	0.088	0.132	0.13	0.353	0.129	0.004	0.041	0.099	0.175	0.087	0.144	0.135	0.319	0.131	0.073	0.165	0.197	0.676
TCGA.95.7043.01A.11R.1949.07	0	0.078	0.082	0.045	0.026	0.064	0.184	0.105	0.219	0.179	0.184	0.075	0.013	0.078	0.111	0.068	0.123	0.117	0.085	0.317	0.22	0.08	0.146	0.161	0.619
TCGA.95.7562.01A.11R.2241.07	0	0.056	0.155	0.117	0.082	0.126	0.263	0.176	0.083	0.104	0.272	0.141	0.023	0.102	0.106	0.198	0.111	0.185	0.268	0.212	0.142	0.016	0.105	0.168	0.695
TCGA.95.7567.01A.11R.2066.07	0	0.058	0.204	0.142	0.109	0.158	0.284	0.209	0.08	0.14	0.324	0.078	0.013	0	0.018	0.218	0.125	0.118	0.253	0.275	0.122	0.062	0.12	0.236	0.733
TCGA.95.7944.01A.11R.2187.07	0	0	0.278	0.172	0.046	0.115	0.379	0.217	0.098	0.055	0.384	0.121	0.025	0.011	0.025	0.182	0.043	0.149	0.215	0.369	0.1	0.107	0.171	0.274	0.752
TCGA.95.7947.01A.11R.2187.07	0	0.027	0.158	0.061	0.098	0.079	0.288	0.168	0.059	0.122	0.342	0.141	0.041	0.066	0.133	0.153	0.14	0.119	0.203	0.266	0.13	0.105	0.162	0.2	0.687
TCGA.95.7948.01A.11R.2187.07	0.001	0.054	0.105	0.084	0.114	0.032	0.171	0.016	0.165	0.179	0.221	0.07	0.02	0.036	0.135	0.151	0.076	0.117	0.217	0.144	0.178	0.087	0.105	0.233	0.61
TCGA.95.8039.01A.11R.2241.07	0	0.085	0.183	0.073	0.12	0.084	0.319	0.15	0.091	0.146	0.347	0.113	0.023	0.036	0.097	0.241	0.096	0.099	0.232	0.316	0.107	0.024	0.25	0.217	0.778
TCGA.95.8494.01A.11R.2326.07	0	0.019	0.14	0.092	0.051	0.188	0.319	0.075	0	0.116	0.187	0.015	0.009	0.059	0.081	0.263	0.088	0.24	0.317	0.243	0.196	0.033	0.154	0.11	0.805
TCGA.95.A4VK.01A.11R.A262.07	0	0.088	0.174	0.069	0.091	0.101	0.289	0.136	0.09	0.168	0.424	0.111	0.034	0.051	0.059	0.07	0.157	0.126	0.057	0.305	0.078	0.096	0.234	0.209	0.618
TCGA.95.A4VN.01A.11R.A262.07	0	0.045	0.252	0.131	0.079	0.105	0.317	0.2	0.053	0.114	0.381	0.097	0.024	0.024	0.05	0.182	0.103	0.127	0.267	0.34	0.109	0.078	0.208	0.206	0.771
TCGA.95.A4VP.01A.21R.A262.07	0	0.084	0.217	0.098	0.063	0.099	0.221	0.15	0.089	0.143	0.396	0.079	0.003	0.072	0.103	0.133	0.156	0.118	0.166	0.399	0.109	0.106	0.21	0.232	0.762
TCGA.97.7546.01A.11R.2039.07	0	0.092	0.185	0.05	0.114	0.092	0.309	0.076	0.149	0.15	0.428	0.103	0	0.058	0.105	0.16	0.114	0.08	0.199	0.337	0.13	0.033	0.222	0.187	0.715
TCGA.97.7547.01A.11R.2039.07	0.008	0.112	0.088	0.077	0.113	0.125	0.32	0.015	0.062	0.167	0.347	0.131	0	0.013	0.048	0.161	0.135	0.134	0.198	0.239	0.129	0.045	0.197	0.203	0.697
TCGA.97.7552.01A.11R.2039.07	0	0.046	0.252	0.121	0.12	0.078	0.342	0.176	0.088	0.154	0.367	0.133	0	0.032	0.111	0.115	0.17	0.019	0.171	0.367	0.051	0.09	0.215	0.252	0.68
TCGA.97.7553.01A.21R.2039.07	0	0.027	0.226	0.089	0.093	0.069	0.283	0.122	0.077	0.116	0.401	0.081	0.012	0.176	0.107	0.217	0.106	0.13	0.338	0.36	0.127	0.074	0.162	0.2	0.82
TCGA.97.7554.01A.11R.2039.07	0	0.057	0.171	0.079	0.137	0.116	0.308	0.068	0.075	0.1	0.313	0.162	0.008	0.068	0.034	0.223	0.111	0.124	0.258	0.274	0.121	0.063	0.162	0.183	0.728
TCGA.97.7937.01A.11R.2170.07	0	0.067	0.105	0.101	0.089	0.088	0.227	0.045	0.081	0.227	0.148	0.014	0.072	0.027	0	0.191	0.134	0.191	0.257	0.191	0.182	0.044	0.094	0.173	0.708
TCGA.97.7938.01A.11R.2170.07	0.001	0.083	0.133	0.05	0.095	0.081	0.268	0.093	0.12	0.209	0.38	0.095	0.028	0.032	0.095	0.182	0.106	0.066	0.176	0.323	0.115	0.081	0.184	0.158	0.656
TCGA.97.7941.01A.11R.2187.07	0	0.074	0.161	0.045	0.076	0.062	0.3	0.089	0.124	0.174	0.33	0.105	0.029	0.116	0.127	0.167	0.073	0.109	0.187	0.331	0.123	0.052	0.236	0.177	0.702
TCGA.97.8171.01A.11R.2287.07	0	0.115	0.044	0.045	0.163	0.028	0.127	0.079	0	0.232	0.135	0	0.028	0.001	0.123	0.19	0.145	0.162	0.194	0	0.184	0.051	0.155	0.142	0.586
TCGA.97.8172.01A.11R.2287.07	0	0.063	0.15	0.062	0.149	0.077	0.282	0.088	0.123	0.158	0.382	0.139	0	0.093	0.091	0.143	0.175	0.128	0.2	0.307	0.085	0.075	0.227	0.222	0.744
TCGA.97.8174.01A.11R.2287.07	0	0.048	0.164	0.043	0.076	0.077	0.322	0.09	0.091	0.203	0.369	0.102	0	0.155	0.126	0.155	0.052	0.148	0.174	0.317	0.101	0.083	0.27	0.184	0.7
TCGA.97.8175.01A.11R.2287.07	0	0.046	0.104	0.042	0.08	0.154	0.314	0.066	0.049	0.17	0.273	0.068	0.054	0.093	0.158	0.248	0.119	0.193	0.301	0.246	0.147	0.03	0.173	0.135	0.781
TCGA.97.8176.01A.11R.2403.07	0	0.047	0.172	0.053	0.086	0.125	0.287	0.052	0.004	0.152	0.274	0.097	0.04	0.113	0.073	0.187	0.127	0.213	0.312	0.231	0.176	0.016	0.189	0.131	0.783
TCGA.97.8177.01A.11R.2287.07	0	0.059	0.164	0.085	0.101	0.088	0.295	0.039	0.149	0.101	0.403	0.062	0	0.059	0.147	0.252	0.087	0.185	0.343	0.309	0.089	0.062	0.184	0.191	0.82
TCGA.97.8179.01A.11R.2287.07	0	0.103	0.064	0.069	0.048	0.083	0.238	0.102	0.088	0.138	0.175	0.021	0.059	0.162	0.104	0.174	0.099	0.181	0.207	0.296	0.214	0.052	0.131	0.142	0.722
TCGA.97.8547.01A.11R.2403.07	0	0.1	0.085	0.092	0.115	0.099	0.314	0.027	0.026	0.171	0.134	0.091	0.021	0.059	0.031	0.287	0.08	0.224	0.303	0.146	0.156	0	0.224	0.091	0.755
TCGA.97.8552.01A.11R.2403.07	0	0.078	0.136	0.05	0.079	0.046	0.261	0.028	0.117	0.147	0.376	0.088	0	0.148	0.124	0.223	0.103	0.13	0.257	0.317	0.143	0.054	0.282	0.162	0.809
TCGA.97.A4LX.01A.11R.A24X.07	0	0.055	0.223	0.138	0.131	0.105	0.316	0.184	0.045	0.067	0.368	0.107	0.003	0.086	0.086	0.219	0.14	0.144	0.25	0.317	0.074	0.07	0.216	0.254	0.807
TCGA.97.A4M0.01A.11R.A24X.07	0	0.058	0.203	0.071	0.096	0.115	0.307	0.144	0.056	0.145	0.411	0.094	0.028	0.022	0.089	0.211	0.08	0.101	0.241	0.303	0.111	0.05	0.238	0.261	0.774
TCGA.97.A4M1.01A.11R.A24X.07	0	0.078	0.15	0.041	0.034	0.031	0.199	0.108	0.101	0.169	0.332	0	0.027	0.198	0.175	0.166	0.07	0.149	0.218	0.321	0.201	0.063	0.214	0.222	0.781
TCGA.97.A4M2.01A.12R.A24X.07	0	0.048	0.218	0.098	0.082	0.011	0.257	0.168	0.09	0.098	0.406	0.057	0.018	0.116	0.134	0.212	0.09	0.151	0.272	0.364	0.109	0.097	0.232	0.215	0.823
TCGA.97.A4M3.01A.11R.A24X.07	0	0.098	0.076	0.071	0.074	0.108	0.231	0.015	0.085	0.219	0.383	0.088	0.003	0.074	0.124	0.13	0.104	0.14	0.132	0.341	0.155	0.004	0.215	0.116	0.666
TCGA.97.A4M5.01A.11R.A24X.07	0	0.084	0.198	0.057	0.068	0.117	0.274	0.105	0.134	0.157	0.371	0.054	0.005	0.102	0.103	0.18	0.101	0.166	0.283	0.36	0.123	0.03	0.21	0.196	0.81
TCGA.97.A4M6.01A.11R.A24X.07	0	0.082	0.175	0.075	0.088	0.082	0.276	0.171	0.135	0.138	0.382	0.13	0	0.037	0.097	0.178	0.124	0.144	0.218	0.333	0.098	0.027	0.25	0.231	0.788
TCGA.97.A4M7.01A.11R.A24X.07	0	0.097	0.133	0.071	0.132	0.079	0.327	0.114	0.099	0.105	0.396	0.1	0	0.05	0.139	0.187	0.145	0.143	0.202	0.314	0.099	0.034	0.271	0.219	0.79
TCGA.99.7458.01A.11R.2039.07	0	0.058	0.193	0.081	0.129	0.12	0.337	0.169	0.075	0.112	0.359	0.127	0.042	0.068	0.084	0.212	0.1	0.065	0.186	0.319	0.086	0.05	0.249	0.227	0.722
TCGA.99.8025.01A.11R.2241.07	0	0.104	0.096	0.058	0.073	0.1	0.244	0.055	0.081	0.194	0.267	0.107	0.027	0.074	0.046	0.158	0.107	0.147	0.179	0.214	0.162	0.02	0.245	0.156	0.684
TCGA.99.8028.01A.11R.2241.07	0	0.039	0.265	0.124	0.09	0.142	0.315	0.159	0.071	0.076	0.414	0.079	0	0.12	0.105	0.209	0.083	0.093	0.246	0.387	0.043	0.085	0.217	0.299	0.788
TCGA.99.8032.01A.11R.2241.07	0	0.091	0.153	0.048	0.119	0.181	0.316	0.064	0.075	0.119	0.346	0.107	0.017	0.037	0.084	0.142	0.131	0.125	0.181	0.252	0.117	0.05	0.216	0.239	0.701
TCGA.99.8033.01A.11R.2241.07	0	0	0.238	0.163	0.016	0.137	0.325	0.225	0.121	0.136	0.355	0.082	0.029	0.016	0.122	0.166	0.059	0.178	0.184	0.403	0.16	0.008	0.144	0.173	0.733
TCGA.99.AA5R.01A.11R.A39D.07	0	0.043	0.253	0.099	0.076	0.04	0.249	0.142	0.103	0.077	0.458	0.081	0	0.148	0.131	0.152	0.142	0.067	0.177	0.407	0.078	0.13	0.222	0.262	0.754
TCGA.J2.8192.01A.11R.2241.07	0	0.082	0.135	0.031	0.094	0.13	0.329	0.082	0.146	0.14	0.355	0.138	0.017	0.079	0.083	0.244	0.098	0.19	0.297	0.259	0.117	0.024	0.216	0.16	0.791
TCGA.J2.8194.01A.11R.2241.07	0	0.034	0.091	0.057	0.09	0.094	0.288	0.02	0.076	0.212	0.321	0.086	0	0.098	0.126	0.169	0.066	0.159	0.242	0.28	0.194	0.068	0.194	0.153	0.729
TCGA.J2.A4AD.01A.11R.A24H.07	0.023	0.099	0.051	0.036	0.071	0.082	0.155	0.04	0.128	0.147	0.23	0.059	0.076	0.128	0.056	0.113	0.095	0.142	0.14	0.201	0.163	0.09	0.168	0.209	0.615
TCGA.J2.A4AE.01A.21R.A24H.07	0.003	0.086	0.147	0.072	0.115	0.053	0.26	0.135	0.014	0.15	0.469	0.096	0.015	0.092	0.113	0.173	0.081	0.111	0.187	0.262	0.087	0.085	0.271	0.2	0.686
TCGA.J2.A4AG.01A.11R.A24H.07	0	0.044	0.178	0.085	0.096	0.084	0.307	0.096	0.127	0.163	0.47	0.132	0	0.049	0.08	0.19	0.113	0.124	0.208	0.352	0.09	0.036	0.258	0.184	0.759
TCGA.L4.A4E5.01A.11R.A24X.07	0	0.071	0.143	0.115	0.082	0.138	0.28	0.203	0.056	0.167	0.316	0.071	0.085	0.057	0.009	0.166	0.114	0.125	0.113	0.246	0.143	0.028	0.196	0.204	0.654
TCGA.L4.A4E6.01A.11R.A24H.07	0	0.033	0.217	0.086	0.074	0.028	0.277	0.129	0.102	0.135	0.389	0.025	0.025	0.113	0.137	0.311	0.078	0.148	0.425	0.332	0.12	0.039	0.215	0.14	0.885
TCGA.L9.A443.01A.12R.A24H.07	0	0.056	0.21	0.096	0.046	0.056	0.184	0.17	0.087	0.197	0.362	0.093	0.047	0.033	0.095	0.154	0.097	0.09	0.134	0.341	0.142	0.07	0.255	0.179	0.696
TCGA.L9.A444.01A.21R.A24H.07	0	0.048	0.264	0.164	0.121	0.086	0.321	0.219	0.087	0.066	0.393	0.099	0.005	0.031	0.061	0.134	0.132	0.1	0.184	0.375	0.08	0.071	0.211	0.298	0.757
TCGA.L9.A50W.01A.12R.A39D.07	0	0.043	0.12	0.066	0.108	0.092	0.306	0.092	0.089	0.197	0.24	0.069	0.017	0.053	0.093	0.187	0.082	0.107	0.133	0.217	0.164	0.051	0.284	0.168	0.671
TCGA.L9.A5IP.01A.21R.A39D.07	0	0.038	0.177	0.093	0.044	0.162	0.254	0.136	0.02	0.199	0.278	0.05	0.043	0.059	0.124	0.104	0.079	0.155	0.18	0.31	0.19	0.022	0.11	0.185	0.657
TCGA.L9.A743.01A.43R.A39D.07	0	0.061	0.211	0.124	0.156	0.11	0.346	0.162	0.058	0.12	0.413	0.111	0	0.045	0.046	0.219	0.097	0.098	0.221	0.319	0.074	0.058	0.251	0.216	0.748
TCGA.L9.A7SV.01A.11R.A39D.07	0	0	0.13	0.094	0.067	0.119	0.262	0.127	0.128	0.162	0.241	0	0.078	0.059	0.005	0.109	0.151	0.115	0.151	0.278	0.16	0.065	0.209	0.203	0.688
TCGA.L9.A8F4.01A.11R.A39D.07	0	0.084	0.203	0.123	0.136	0.105	0.345	0.18	0.067	0.04	0.418	0.089	0	0.057	0.049	0.13	0.122	0.086	0.184	0.333	0.08	0.105	0.194	0.254	0.692
TCGA.MN.A4N1.01A.11R.A24X.07	0	0.086	0.035	0.087	0.095	0.118	0.193	0.054	0	0.156	0.145	0.019	0.03	0.168	0.057	0.187	0.064	0.233	0.173	0.2	0.148	0	0.196	0.156	0.679
TCGA.MN.A4N4.01A.12R.A24X.07	0	0.073	0.182	0.089	0.088	0.059	0.222	0.099	0.146	0.133	0.256	0.041	0.04	0.074	0.063	0.119	0.11	0.189	0.237	0.414	0.167	0.047	0.147	0.187	0.785
TCGA.MN.A4N5.01A.11R.A24X.07	0	0.039	0.257	0.161	0.055	0.087	0.254	0.214	0.099	0.17	0.341	0.051	0.067	0.006	0.066	0.115	0.125	0.091	0.177	0.338	0.118	0.025	0.229	0.228	0.71
TCGA.MP.A4SV.01A.11R.A24X.07	0	0.08	0.224	0.138	0.105	0.092	0.335	0.203	0.071	0.111	0.379	0.12	0.03	0	0.022	0.159	0.118	0.118	0.193	0.311	0.097	0.038	0.245	0.226	0.734
TCGA.MP.A4SW.01A.21R.A24X.07	0	0.073	0.166	0.074	0.118	0.073	0.267	0.096	0.049	0.147	0.389	0.11	0.007	0.087	0.126	0.192	0.13	0.191	0.259	0.232	0.131	0.022	0.237	0.194	0.783
TCGA.MP.A4SY.01A.21R.A24X.07	0	0.075	0.12	0.01	0.091	0.118	0.287	0.073	0.104	0.193	0.163	0.083	0.042	0.113	0.097	0.247	0.083	0.222	0.285	0.174	0.156	0	0.203	0.101	0.736
TCGA.MP.A4T4.01A.11R.A262.07	0	0.076	0.256	0.144	0.116	0.084	0.328	0.205	0.052	0.094	0.366	0.108	0.012	0.027	0.046	0.176	0.117	0.118	0.242	0.365	0.077	0.077	0.214	0.238	0.774
TCGA.MP.A4T6.01A.32R.A262.07	0	0.073	0.167	0.079	0.102	0.091	0.248	0.153	0.055	0.155	0.392	0.116	0.034	0.024	0.065	0.126	0.097	0.101	0.131	0.303	0.133	0.055	0.28	0.235	0.703
TCGA.MP.A4T7.01A.11R.A24X.07	0	0.072	0.174	0.073	0.079	0.087	0.273	0.135	0.043	0.166	0.413	0.062	0.037	0.057	0.1	0.209	0.076	0.168	0.235	0.307	0.138	0.031	0.206	0.175	0.758
TCGA.MP.A4T8.01A.11R.A24X.07	0.005	0.074	0.133	0.044	0.073	0.155	0.29	0.037	0.058	0.234	0.227	0.079	0.04	0.057	0.053	0.169	0.052	0.157	0.142	0.218	0.165	0.027	0.18	0.166	0.625
TCGA.MP.A4T9.01A.11R.A24X.07	0	0.044	0.179	0.068	0.068	0.064	0.223	0.097	0.113	0.156	0.389	0.088	0.022	0.135	0.099	0.181	0.087	0.151	0.262	0.347	0.144	0.046	0.211	0.173	0.778
TCGA.MP.A4TA.01A.21R.A24X.07	0	0.036	0.214	0.108	0.096	0.113	0.279	0.198	0.065	0.142	0.299	0.095	0.09	0	0.05	0.163	0.129	0.164	0.222	0.311	0.107	0.061	0.145	0.232	0.737
TCGA.MP.A4TC.01A.11R.A24X.07	0	0.029	0.229	0.157	0.068	0.109	0.274	0.193	0.108	0.152	0.257	0.061	0.038	0.08	0.01	0.214	0.049	0.213	0.269	0.359	0.127	0.077	0.143	0.197	0.785
TCGA.MP.A4TD.01A.32R.A262.07	0	0.099	0.135	0.039	0.112	0.079	0.293	0.061	0.09	0.153	0.458	0.101	0	0.075	0.131	0.124	0.157	0.125	0.144	0.334	0.078	0.045	0.248	0.211	0.71
TCGA.MP.A4TE.01A.22R.A466.07	0	0.016	0.107	0.066	0.108	0.234	0.221	0.097	0.005	0.219	0.138	0.056	0.036	0.029	0.155	0.036	0.147	0.115	0.087	0.262	0.244	0.018	0.136	0.217	0.623
TCGA.MP.A4TF.01A.11R.A262.07	0	0	0.181	0.11	0.041	0.161	0.297	0.224	0.094	0.17	0.166	0.052	0.117	0.027	0.027	0.166	0.109	0.16	0.14	0.324	0.171	0.04	0.09	0.203	0.682
TCGA.MP.A4TH.01A.31R.A262.07	0	0.053	0.179	0.099	0.136	0.094	0.325	0.17	0.092	0.14	0.417	0.131	0	0.009	0.107	0.183	0.188	0.061	0.131	0.309	0.042	0.061	0.245	0.252	0.706
TCGA.MP.A4TI.01A.21R.A24X.07	0	0.054	0.255	0.129	0.095	0.1	0.36	0.195	0.073	0.049	0.373	0.109	0	0.067	0.083	0.219	0.098	0.13	0.299	0.353	0.094	0.055	0.193	0.244	0.815
TCGA.MP.A4TJ.01A.51R.A262.07	0	0.077	0.253	0.127	0.148	0.088	0.326	0.192	0.034	0.092	0.442	0.129	0	0.015	0.054	0.186	0.118	0.076	0.193	0.386	0.071	0.092	0.241	0.227	0.749
TCGA.MP.A4TK.01A.11R.A24X.07	0	0.075	0.195	0.064	0.105	0.057	0.311	0.098	0.126	0.128	0.377	0.108	0.012	0.062	0.111	0.205	0.111	0.175	0.241	0.337	0.075	0.046	0.229	0.191	0.783
TCGA.MP.A5C7.01A.11R.A262.07	0	0.086	0.133	0.064	0.049	0.131	0.258	0.12	0.037	0.224	0.267	0.085	0.033	0.056	0.064	0.126	0.078	0.091	0.045	0.317	0.17	0.061	0.185	0.144	0.578
TCGA.NJ.A4YF.01A.12R.A262.07	0	0.039	0.187	0.058	0.078	0.177	0.215	0.061	0.037	0.252	0.318	0.064	0.026	0.003	0.124	0.155	0.103	0.17	0.174	0.118	0.19	0.02	0.138	0.211	0.63
TCGA.NJ.A4YG.01A.22R.A262.07	0	0.092	0.153	0.068	0.072	0.07	0.282	0.151	0.131	0.142	0.308	0.072	0.021	0.085	0.097	0.269	0.069	0.16	0.263	0.276	0.119	0.061	0.212	0.163	0.766
TCGA.NJ.A4YI.01A.11R.A262.07	0	0.113	0.079	0.05	0.084	0.05	0.289	0	0.034	0.148	0.199	0	0.027	0.207	0.056	0.232	0.075	0.231	0.297	0.213	0.211	0.067	0.21	0.109	0.789
TCGA.NJ.A4YP.01A.11R.A262.07	0	0.059	0.209	0.134	0.065	0.122	0.293	0.2	0.094	0.174	0.321	0.076	0.055	0	0.053	0.174	0.063	0.159	0.2	0.314	0.124	0.052	0.17	0.225	0.715
TCGA.NJ.A4YQ.01A.11R.A262.07	0	0.032	0.224	0.117	0.146	0.085	0.298	0.188	0.076	0.112	0.385	0.125	0.06	0	0.122	0.128	0.177	0.075	0.192	0.366	0.07	0.091	0.168	0.266	0.721
TCGA.NJ.A55A.01A.11R.A262.07	0	0.086	0.157	0.041	0.115	0.076	0.29	0.079	0.124	0.148	0.435	0.157	0	0.043	0.076	0.116	0.157	0.03	0.109	0.322	0.087	0.075	0.285	0.25	0.678
TCGA.NJ.A55O.01A.11R.A262.07	0	0.042	0.139	0.036	0.095	0.116	0.259	0.062	0.097	0.165	0.382	0.08	0.008	0.068	0.13	0.266	0.084	0.169	0.326	0.26	0.119	0.042	0.197	0.168	0.794
TCGA.NJ.A55R.01A.11R.A262.07	0	0.132	0.1	0.043	0.112	0.111	0.242	0.093	0.086	0.148	0.332	0.115	0.063	0.015	0.11	0.064	0.215	0.087	0.037	0.27	0.117	0	0.268	0.182	0.621
TCGA.NJ.A7XG.01A.12R.A39D.07	0	0.02	0.087	0.013	0.003	0.12	0.267	0.033	0.069	0.208	0.3	0	0.037	0.056	0.17	0.156	0.068	0.167	0.023	0.213	0.195	0.069	0.252	0.109	0.592
TCGA.O1.A52J.01A.11R.A262.07	0	0.055	0.14	0.054	0.107	0.089	0.314	0.079	0	0.147	0.303	0.019	0	0.074	0.081	0.24	0.114	0.163	0.3	0.198	0.182	0.086	0.257	0.153	0.803
TCGA.S2.AA1A.01A.12R.A39D.07	0	0.065	0.196	0.087	0.161	0.048	0.331	0.115	0.105	0.113	0.458	0.122	0	0.03	0.132	0.15	0.209	0.082	0.12	0.32	0.033	0.067	0.274	0.251	0.72

## Sheet: LUSC
sample	CD4_naive	CD8_naive	Tc	Tex	Tr1	nTreg	iTreg	Th1	Th2	Th17	Tfh	Tcm	Tem	NKT	MAIT	DC	B_cell	Monocyte	Macrophage	NK	Neutrophil	Tgd	CD4_T	CD8_T	InfiltrationScore
TCGA.18.3406.01A.01R.0980.07	0	0.07	0.166	0.086	0.133	0.091	0.179	0.201	0.226	0.099	0.344	0.079	0.044	0.117	0.159	0.228	0.131	0.164	0.263	0.296	0.094	0.079	0.105	0.288	0.774
TCGA.18.3407.01A.01R.0980.07	0	0.088	0.166	0.05	0.127	0.057	0.196	0.19	0.193	0.164	0.194	0.07	0.024	0.153	0.073	0.209	0.127	0.186	0.24	0.279	0.147	0.106	0.136	0.154	0.73
TCGA.18.3408.01A.01R.0980.07	0	0.092	0.17	0.073	0	0.12	0.227	0.238	0.306	0.142	0.13	0.109	0	0.101	0.136	0.301	0.135	0.13	0.296	0.341	0.135	0.07	0.025	0.179	0.762
TCGA.18.3409.01A.01R.0980.07	0	0.084	0.154	0.029	0.098	0.077	0.161	0.117	0.286	0.159	0.191	0.064	0.011	0.17	0.123	0.264	0.112	0.222	0.329	0.272	0.107	0.05	0.174	0.191	0.825
TCGA.18.3410.01A.01R.0980.07	0	0.05	0.247	0.098	0.12	0.125	0.279	0.235	0.323	0.018	0.277	0.09	0.004	0.055	0.063	0.239	0.16	0.189	0.269	0.33	0.103	0.103	0.112	0.222	0.802
TCGA.18.3411.01A.01R.0980.07	0	0.036	0.189	0.07	0.095	0.086	0.221	0.21	0.247	0.081	0.23	0.059	0.011	0.133	0.099	0.234	0.102	0.171	0.337	0.359	0.154	0.089	0.048	0.162	0.773
TCGA.18.3412.01A.01R.0980.07	0	0.073	0.136	0.036	0.124	0.055	0.19	0.1	0.317	0.068	0.208	0.03	0.013	0.13	0.107	0.226	0.104	0.196	0.282	0.258	0.157	0.115	0.075	0.22	0.75
TCGA.18.3414.01A.01R.0980.07	0	0.095	0.16	0.007	0.097	0.129	0.156	0.11	0.256	0.106	0.298	0.104	0	0.162	0.087	0.183	0.091	0.141	0.245	0.291	0.169	0.122	0.083	0.204	0.695
TCGA.18.3415.01A.01R.0980.07	0	0.065	0.223	0.111	0.078	0.054	0.209	0.266	0.295	0.071	0.251	0.081	0.006	0.119	0.124	0.182	0.114	0.141	0.239	0.414	0.108	0.134	0.045	0.18	0.703
TCGA.18.3416.01A.01R.0980.07	0	0.048	0.282	0.13	0.095	0.082	0.228	0.329	0.21	0	0.347	0.095	0.007	0.089	0.041	0.219	0.119	0.135	0.276	0.348	0.12	0.145	0.134	0.23	0.781
TCGA.18.3417.01A.01R.1443.07	0	0.094	0.165	0.059	0.111	0.034	0.123	0.094	0.271	0.131	0.156	0.096	0	0.157	0.129	0.234	0.125	0.199	0.281	0.23	0.142	0.088	0.044	0.192	0.714
TCGA.18.3419.01A.01R.0980.07	0	0.056	0.218	0.1	0.137	0.091	0.219	0.296	0.123	0.044	0.298	0.106	0.062	0.061	0.019	0.222	0.151	0.206	0.256	0.269	0.173	0.115	0.102	0.171	0.765
TCGA.18.3421.01A.01R.0980.07	0	0.082	0.205	0.092	0.066	0.05	0.102	0.313	0.194	0.101	0.266	0.055	0.073	0.126	0.132	0.23	0.097	0.225	0.269	0.339	0.125	0.138	0.044	0.215	0.763
TCGA.18.4083.01A.01R.1100.07	0	0.114	0.219	0.096	0.132	0.077	0.222	0.256	0.215	0.092	0.223	0.088	0.048	0.048	0.055	0.183	0.115	0.178	0.205	0.311	0.109	0.064	0.189	0.203	0.737
TCGA.18.4086.01A.01R.1100.07	0	0.076	0.178	0.073	0.106	0.072	0.218	0.213	0.277	0.062	0.226	0.09	0.022	0.164	0.111	0.173	0.134	0.142	0.259	0.366	0.11	0.082	0.108	0.186	0.73
TCGA.18.4721.01A.01R.1443.07	0	0.026	0.254	0.062	0.118	0.05	0.235	0.268	0.182	0.084	0.299	0.135	0	0.125	0.141	0.236	0.148	0.148	0.295	0.316	0.122	0.124	0.106	0.2	0.776
TCGA.18.5592.01A.01R.1635.07	0	0.02	0.176	0.09	0.024	0.088	0.174	0.288	0.277	0.182	0.168	0.04	0.006	0.115	0.153	0.177	0.104	0.136	0.152	0.366	0.171	0.101	0.073	0.177	0.669
TCGA.18.5595.01A.01R.1635.07	0	0.147	0.147	0.011	0.098	0.081	0.152	0.124	0.27	0.13	0.097	0.008	0.035	0.091	0.125	0.146	0.115	0.167	0.18	0.281	0.225	0.039	0.064	0.113	0.638
TCGA.21.1070.01A.01R.0692.07	0	0.072	0.251	0.102	0.125	0.09	0.205	0.299	0.109	0.062	0.315	0.106	0	0.107	0.133	0.205	0.17	0.155	0.239	0.3	0.111	0.103	0.16	0.202	0.761
TCGA.21.1071.01A.01R.0692.07	0	0.1	0.179	0.089	0.112	0.108	0.205	0.273	0.279	0.107	0.143	0.039	0.017	0.116	0.11	0.203	0.116	0.208	0.246	0.341	0.182	0.037	0.119	0.13	0.763
TCGA.21.1072.01A.01R.0692.07	0	0.098	0.139	0.053	0.053	0.098	0.21	0.238	0.268	0.101	0.057	0.05	0.042	0.107	0.119	0.189	0.085	0.156	0.234	0.276	0.202	0.089	0.077	0.108	0.656
TCGA.21.1075.01A.01R.0692.07	0	0.105	0.02	0	0.126	0.03	0.052	0.14	0.141	0.154	0.063	0.049	0	0.15	0.117	0.219	0.167	0.213	0.182	0.099	0.212	0	0.037	0.071	0.592
TCGA.21.1076.01A.01R.0692.07	0	0.087	0.218	0.082	0.121	0.103	0.194	0.245	0.203	0.072	0.337	0.084	0	0.127	0.134	0.261	0.121	0.158	0.349	0.355	0.078	0.054	0.226	0.218	0.872
TCGA.21.1076.01A.02R.0692.07	0	0.085	0.209	0.05	0.126	0.102	0.194	0.191	0.201	0.07	0.341	0.086	0	0.136	0.138	0.284	0.116	0.172	0.389	0.336	0.09	0.04	0.228	0.207	0.9
TCGA.21.1077.01A.01R.0692.07	0	0.103	0.119	0.06	0.145	0.066	0.135	0.103	0.294	0.13	0.21	0.089	0	0.14	0.097	0.225	0.139	0.201	0.273	0.291	0.129	0.053	0.144	0.158	0.77
TCGA.21.1078.01A.01R.0692.07	0.022	0.151	0.13	0	0.048	0.138	0.109	0.11	0.156	0.091	0.108	0.001	0.033	0.058	0.097	0.105	0.1	0.179	0.119	0.222	0.188	0.105	0.116	0.152	0.583
TCGA.21.1079.01A.01R.0692.07	0	0.124	0.153	0.056	0.12	0.105	0.186	0.121	0.157	0.129	0	0.035	0.062	0.163	0.078	0.272	0.059	0.195	0.238	0.193	0.171	0.034	0.044	0.174	0.665
TCGA.21.1080.01A.01R.0692.07	0	0.055	0.189	0.067	0.092	0.097	0.197	0.249	0.209	0.068	0.265	0.075	0.035	0.041	0.053	0.251	0.127	0.192	0.247	0.321	0.137	0.147	0.138	0.205	0.799
TCGA.21.1081.01A.01R.0692.07	0	0.139	0.134	0	0.138	0.116	0.247	0.112	0.151	0.156	0.106	0.02	0	0.135	0.065	0.169	0.114	0.247	0.248	0.201	0.203	0.066	0.136	0.116	0.709
TCGA.21.1082.01A.01R.0692.07	0	0.109	0.226	0.036	0.134	0.086	0.228	0.233	0.198	0.088	0.326	0.125	0.01	0.066	0.04	0.17	0.14	0.179	0.249	0.356	0.093	0.105	0.179	0.22	0.784
TCGA.21.1083.01A.01R.0692.07	0	0.085	0.245	0.126	0.12	0.104	0.245	0.289	0.198	0.062	0.155	0.014	0.037	0.075	0.059	0.208	0.174	0.219	0.279	0.352	0.151	0.057	0.137	0.124	0.812
TCGA.21.5782.01A.01R.1635.07	0	0.127	0.194	0.075	0.091	0.024	0.199	0.236	0.221	0.079	0.212	0.029	0.043	0.22	0.07	0.102	0.178	0.138	0.124	0.425	0.126	0.156	0.129	0.197	0.7
TCGA.21.5783.01A.41R.2187.07	0	0.132	0.11	0.039	0.083	0.082	0.156	0.115	0.276	0.143	0.096	0.033	0.012	0.197	0.125	0.18	0.098	0.224	0.165	0.187	0.154	0.064	0.151	0.108	0.626
TCGA.21.5784.01A.01R.1635.07	0	0.045	0.264	0.033	0.087	0.033	0.107	0.134	0.273	0.126	0.373	0.087	0	0.139	0.172	0.219	0.112	0.112	0.235	0.455	0.091	0.16	0.15	0.223	0.789
TCGA.21.5786.01A.01R.1635.07	0	0.111	0.162	0.058	0.137	0.089	0.161	0.199	0.291	0.112	0.171	0.094	0	0.135	0.046	0.167	0.144	0.17	0.183	0.307	0.126	0.055	0.115	0.223	0.709
TCGA.21.5787.01A.01R.1635.07	0	0.058	0.277	0.142	0.06	0.16	0.215	0.316	0.217	0.102	0.336	0.061	0	0.057	0.081	0.163	0.118	0.144	0.23	0.377	0.079	0.119	0.066	0.294	0.726
TCGA.21.A5DI.01A.31R.A26W.07	0	0.082	0.162	0.07	0.065	0.104	0.121	0.234	0.183	0.123	0.19	0.016	0.067	0.178	0.074	0.149	0.091	0.212	0.099	0.318	0.142	0.092	0.124	0.163	0.641
TCGA.22.0940.01A.01R.0692.07	0	0.054	0.244	0.113	0.085	0.065	0.218	0.27	0.262	0.05	0.362	0.103	0	0.121	0.122	0.201	0.1	0.195	0.264	0.389	0.093	0.12	0.131	0.216	0.785
TCGA.22.0944.01A.01R.0692.07	0	0.095	0.197	0.022	0.115	0.054	0.135	0.204	0.182	0.194	0.069	0.076	0.007	0.073	0.107	0.168	0.168	0.158	0.132	0.261	0.166	0.062	0.096	0.135	0.634
TCGA.22.1000.01A.01R.A32Z.07	0	0.096	0.196	0.051	0.129	0.099	0.193	0.201	0.23	0.123	0.317	0.066	0	0.196	0.117	0.293	0.121	0.17	0.315	0.313	0.066	0.076	0.2	0.212	0.834
TCGA.22.1002.01A.01R.0692.07	0	0.071	0.206	0.034	0.099	0.032	0.116	0.156	0.254	0.187	0.347	0.1	0	0.15	0.099	0.151	0.125	0.169	0.23	0.377	0.135	0.115	0.173	0.194	0.768
TCGA.22.1005.01A.01R.0692.07	0	0.073	0.29	0.116	0.159	0.061	0.179	0.271	0.203	0.078	0.363	0.115	0	0.088	0.087	0.128	0.226	0.145	0.182	0.386	0.045	0.123	0.22	0.234	0.773
TCGA.22.1011.01A.01R.0692.07	0	0.087	0.213	0.039	0.178	0.091	0.203	0.19	0.239	0.07	0.335	0.139	0	0.099	0.079	0.151	0.204	0.121	0.184	0.313	0.062	0.109	0.183	0.262	0.731
TCGA.22.1012.01A.01R.0692.07	0	0.079	0.197	0.035	0.101	0.042	0.133	0.134	0.279	0.117	0.257	0.106	0	0.184	0.1	0.204	0.126	0.201	0.246	0.39	0.11	0.069	0.161	0.22	0.819
TCGA.22.1016.01A.01R.0692.07	0	0.085	0.189	0.012	0.106	0.057	0.195	0.112	0.226	0.145	0.214	0.022	0	0.252	0.108	0.249	0.097	0.234	0.37	0.363	0.17	0.099	0.161	0.093	0.857
TCGA.22.1017.01A.01R.0692.07	0	0.04	0.171	0.09	0.091	0.102	0.174	0.276	0.199	0.164	0.233	0.017	0.035	0.119	0.102	0.277	0.087	0.232	0.276	0.408	0.124	0.121	0.109	0.166	0.829
TCGA.22.4591.01A.01R.1201.07	0	0.114	0.163	0.002	0.1	0.095	0.189	0.221	0.289	0.089	0.173	0.029	0.049	0.137	0.087	0.194	0.135	0.155	0.228	0.338	0.149	0.114	0.112	0.134	0.714
TCGA.22.4593.01A.21R.1820.07	0	0.146	0.143	0.006	0.121	0.101	0.231	0.113	0.295	0.142	0.1	0.048	0	0.069	0.086	0.117	0.101	0.196	0.224	0.307	0.159	0.09	0.101	0.168	0.679
TCGA.22.4593.11A.01R.1820.07	0	0.034	0.24	0.044	0.076	0	0.118	0.156	0.229	0.161	0.359	0.053	0	0.218	0.163	0.234	0.074	0.197	0.404	0.37	0.197	0.153	0.13	0.126	0.856
TCGA.22.4594.01A.01R.1201.07	0	0.047	0.158	0.091	0.177	0.167	0.172	0.176	0.196	0.102	0.358	0.13	0.031	0.038	0.127	0.165	0.178	0.173	0.251	0.314	0.051	0.113	0.139	0.254	0.753
TCGA.22.4595.01A.01R.1201.07	0	0.086	0.228	0.054	0.114	0.072	0.239	0.196	0.262	0.08	0.23	0.098	0.005	0.138	0.093	0.199	0.142	0.211	0.31	0.327	0.11	0.066	0.12	0.206	0.803
TCGA.22.4596.01A.01R.1201.07	0	0.073	0.178	0.074	0.152	0.084	0.217	0.231	0.163	0.119	0.323	0.104	0	0.165	0.126	0.269	0.148	0.155	0.297	0.305	0.09	0.094	0.206	0.187	0.819
TCGA.22.4599.01A.01R.1443.07	0	0.034	0.277	0.11	0.101	0.063	0.181	0.304	0.202	0.099	0.314	0.098	0.029	0.121	0.078	0.276	0.1	0.174	0.318	0.363	0.117	0.103	0.115	0.204	0.823
TCGA.22.4601.01A.01R.1443.07	0	0.119	0.156	0.049	0.122	0.087	0.191	0.232	0.243	0.135	0.192	0.063	0.02	0.076	0.065	0.21	0.121	0.16	0.237	0.254	0.151	0.061	0.139	0.152	0.704
TCGA.22.4604.01A.01R.1201.07	0	0.094	0.2	0.074	0.114	0.078	0.221	0.25	0.227	0.099	0.234	0.049	0.028	0.164	0.087	0.242	0.078	0.199	0.347	0.317	0.113	0.064	0.18	0.161	0.808
TCGA.22.4605.01A.21R.2125.07	0	0.065	0.162	0.039	0.109	0.044	0.169	0.116	0.229	0.147	0.282	0.058	0	0.196	0.138	0.264	0.071	0.189	0.334	0.373	0.144	0.065	0.157	0.173	0.842
TCGA.22.4607.01A.01R.1201.07	0	0.073	0.125	0.054	0.129	0.101	0.152	0.113	0.156	0.145	0.138	0.078	0.052	0.154	0.099	0.245	0.164	0.169	0.291	0.142	0.152	0.092	0.079	0.177	0.701
TCGA.22.4609.01A.21R.2125.07	0	0.088	0.225	0.073	0.135	0.031	0.218	0.233	0.198	0.112	0.346	0.098	0	0.141	0.115	0.254	0.115	0.171	0.309	0.323	0.088	0.096	0.17	0.212	0.811
TCGA.22.4609.11A.01R.2125.07	0	0.026	0.324	0.055	0.09	0	0.1	0.198	0.227	0.138	0.406	0.064	0	0.151	0.126	0.178	0.095	0.126	0.289	0.454	0.138	0.146	0.188	0.166	0.807
TCGA.22.4613.01A.01R.1443.07	0	0.066	0.223	0.083	0.117	0.096	0.232	0.26	0.207	0.046	0.264	0.103	0.036	0.096	0.048	0.226	0.151	0.138	0.326	0.347	0.097	0.099	0.129	0.183	0.788
TCGA.22.5471.01A.01R.1635.07	0	0.102	0.266	0.131	0.063	0.094	0.159	0.34	0.252	0.066	0.303	0.063	0	0.123	0.049	0.219	0.102	0.181	0.229	0.36	0.108	0.116	0.096	0.262	0.769
TCGA.22.5471.11A.01R.1635.07	0	0.033	0.227	0.018	0.072	0	0.098	0.124	0.234	0.184	0.347	0.015	0	0.237	0.15	0.196	0.089	0.188	0.359	0.43	0.184	0.107	0.153	0.138	0.858
TCGA.22.5472.01A.01R.1635.07	0.003	0.101	0.181	0.025	0.069	0.038	0.088	0.162	0.193	0.165	0.223	0.042	0	0.189	0.111	0.26	0.076	0.198	0.316	0.299	0.17	0.101	0.155	0.095	0.775
TCGA.22.5472.11A.11R.1635.07	0	0.057	0.285	0.02	0.066	0	0.127	0.15	0.225	0.146	0.268	0.042	0	0.268	0.143	0.227	0.1	0.218	0.345	0.366	0.167	0.125	0.162	0.133	0.848
TCGA.22.5473.01A.01R.1635.07	0	0.039	0.217	0.054	0.103	0.068	0.138	0.208	0.297	0.165	0.125	0.051	0	0.162	0.099	0.253	0.101	0.209	0.27	0.382	0.137	0.098	0.062	0.191	0.793
TCGA.22.5474.01A.01R.1635.07	0	0.007	0.247	0.111	0.116	0.075	0.259	0.284	0.239	0.028	0.296	0.101	0	0.103	0.1	0.16	0.151	0.128	0.302	0.405	0.127	0.128	0.113	0.213	0.79
TCGA.22.5477.01A.01R.1635.07	0	0.105	0.192	0.053	0.108	0.075	0.222	0.209	0.292	0.036	0.191	0.072	0.028	0.085	0.113	0.185	0.112	0.164	0.216	0.32	0.189	0.086	0.101	0.19	0.73
TCGA.22.5478.01A.01R.1635.07	0	0.117	0.148	0.01	0.113	0.057	0.135	0.199	0.268	0.095	0.278	0.11	0.01	0.168	0.049	0.171	0.151	0.206	0.22	0.307	0.108	0.133	0.163	0.183	0.745
TCGA.22.5478.11A.11R.1635.07	0	0.011	0.281	0.035	0.072	0	0.099	0.21	0.211	0.164	0.381	0.042	0	0.254	0.136	0.19	0.121	0.168	0.35	0.41	0.2	0.143	0.146	0.134	0.849
TCGA.22.5479.01A.31R.1949.07	0	0.088	0.218	0.087	0.104	0.065	0.14	0.3	0.26	0.179	0.185	0.071	0.042	0.083	0.081	0.191	0.113	0.197	0.215	0.348	0.137	0.048	0.118	0.191	0.746
TCGA.22.5480.01A.01R.1635.07	0	0.107	0.195	0.102	0.121	0.137	0.254	0.255	0.236	0.184	0.344	0.107	0	0.062	0.039	0.212	0.129	0.15	0.161	0.308	0.106	0.036	0.149	0.223	0.71
TCGA.22.5481.01A.31R.1949.07	0	0.076	0.248	0.125	0.107	0.067	0.152	0.304	0.192	0.029	0.265	0.069	0.029	0.145	0.012	0.102	0.155	0.189	0.204	0.256	0.156	0.135	0.109	0.266	0.71
TCGA.22.5481.11A.01R.1949.07	0	0.043	0.267	0.012	0.075	0	0.089	0.155	0.215	0.173	0.392	0.049	0	0.253	0.152	0.18	0.095	0.151	0.3	0.433	0.133	0.145	0.188	0.186	0.823
TCGA.22.5482.01A.01R.1635.07	0	0.076	0.154	0.036	0.1	0.094	0.14	0.148	0.288	0.101	0.06	0.043	0.042	0.137	0.117	0.213	0.102	0.177	0.197	0.343	0.168	0.068	0.051	0.184	0.709
TCGA.22.5482.11A.01R.1635.07	0	0.029	0.269	0.04	0.078	0	0.116	0.189	0.23	0.108	0.367	0.046	0	0.266	0.148	0.159	0.084	0.192	0.318	0.418	0.157	0.153	0.183	0.159	0.825
TCGA.22.5483.01A.01R.1820.07	0	0.101	0.226	0.082	0.077	0.126	0.252	0.238	0.23	0.051	0.06	0.108	0.031	0.066	0.079	0.227	0.132	0.21	0.325	0.317	0.156	0.054	0.095	0.116	0.78
TCGA.22.5483.11A.11R.1820.07	0	0.046	0.226	0.029	0.102	0.026	0.124	0.129	0.247	0.16	0.341	0.039	0	0.212	0.119	0.255	0.096	0.181	0.396	0.383	0.146	0.124	0.152	0.143	0.865
TCGA.22.5485.01A.01R.1635.07	0	0.092	0.144	0.085	0.091	0.065	0.095	0.176	0.198	0.152	0.08	0.057	0	0.205	0.096	0.286	0.122	0.182	0.326	0.327	0.186	0.05	0.037	0.094	0.771
TCGA.22.5489.01A.01R.1635.07	0	0.105	0.217	0.088	0.141	0.094	0.221	0.259	0.227	0.141	0.283	0.099	0	0.108	0.061	0.193	0.167	0.156	0.296	0.337	0.083	0.072	0.147	0.216	0.788
TCGA.22.5489.11A.01R.1635.07	0	0.036	0.253	0.035	0.042	0	0.051	0.248	0.223	0.151	0.375	0.03	0.007	0.195	0.149	0.129	0.117	0.171	0.295	0.396	0.192	0.172	0.185	0.191	0.828
TCGA.22.5491.01A.01R.1635.07	0	0.086	0.112	0.037	0.083	0.095	0.18	0.178	0.306	0.114	0.171	0.038	0.07	0.142	0.09	0.185	0.153	0.147	0.212	0.311	0.145	0.071	0.086	0.186	0.704
TCGA.22.5491.11A.01R.1858.07	0	0.014	0.239	0.021	0.084	0	0.077	0.12	0.249	0.179	0.413	0.059	0	0.232	0.161	0.134	0.099	0.153	0.27	0.461	0.166	0.118	0.181	0.175	0.809
TCGA.22.5492.01A.01R.1635.07	0	0.102	0.231	0.071	0.13	0.093	0.234	0.258	0.221	0.069	0.317	0.097	0	0.162	0.057	0.265	0.129	0.163	0.28	0.335	0.112	0.093	0.086	0.225	0.788
TCGA.22.A5C4.01A.12R.A27Q.07	0	0.128	0.127	0.083	0.092	0.08	0.152	0.243	0.163	0.089	0.203	0.028	0.086	0.112	0.061	0.218	0.1	0.212	0.191	0.262	0.15	0.092	0.105	0.192	0.706
TCGA.33.4532.01A.01R.1201.07	0	0.11	0.125	0.025	0.092	0.125	0.257	0.194	0.172	0.132	0.114	0	0.056	0.109	0.052	0.229	0.11	0.179	0.215	0.222	0.181	0.086	0.088	0.139	0.673
TCGA.33.4533.01A.01R.1201.07	0	0.152	0.203	0.069	0.079	0.062	0.115	0.247	0.282	0.095	0.102	0	0.006	0.129	0.172	0.187	0.091	0.152	0.207	0.271	0.095	0.114	0.132	0.188	0.653
TCGA.33.4538.01A.01R.1201.07	0	0.093	0.136	0.024	0.094	0.086	0.21	0.194	0.282	0.164	0.177	0.078	0	0.102	0.111	0.145	0.136	0.158	0.182	0.313	0.161	0.066	0.118	0.155	0.675
TCGA.33.4547.01A.01R.1201.07	0	0.119	0.13	0.031	0.117	0.053	0.15	0.097	0.285	0.187	0.237	0.076	0	0.141	0.089	0.187	0.156	0.193	0.227	0.285	0.135	0.061	0.178	0.151	0.747
TCGA.33.4566.01A.01R.1443.07	0	0.045	0.28	0.091	0.058	0.098	0.183	0.346	0.125	0.127	0.253	0.101	0.028	0.029	0.133	0.26	0.116	0.19	0.31	0.365	0.117	0.055	0.102	0.182	0.811
TCGA.33.4579.01A.01R.1443.07	0.024	0.07	0.141	0.05	0.094	0.089	0.123	0.201	0.115	0.103	0.092	0.048	0.054	0.119	0.094	0	0.152	0.203	0.163	0.162	0.16	0.158	0.196	0.166	0.594
TCGA.33.4582.01A.01R.1443.07	0	0.088	0.144	0.105	0.063	0.073	0.125	0.239	0.277	0.124	0.073	0	0.06	0.099	0.049	0.191	0.111	0.215	0.199	0.265	0.174	0.117	0.019	0.154	0.656
TCGA.33.4583.01A.01R.1443.07	0	0.014	0.241	0.103	0	0.08	0.154	0.283	0.278	0.09	0.149	0.063	0.029	0.058	0.135	0.202	0.138	0.124	0.141	0.356	0.163	0.143	0.048	0.218	0.686
TCGA.33.4586.01A.01R.1443.07	0	0.059	0.114	0.039	0.053	0.088	0.118	0.102	0.326	0.158	0.058	0.086	0.005	0.127	0.161	0.218	0.116	0.176	0.22	0.338	0.204	0.06	0.031	0.178	0.731
TCGA.33.4587.01A.11R.2125.07	0	0.124	0.078	0	0.084	0.106	0.181	0.149	0.2	0.095	0.123	0.033	0.033	0.14	0.098	0.189	0.149	0.217	0.215	0.136	0.154	0.159	0.14	0.162	0.672
TCGA.33.4587.11A.01R.2125.07	0	0.045	0.245	0.048	0.012	0	0.038	0.222	0.242	0.125	0.394	0.039	0.035	0.242	0.182	0.211	0.113	0.147	0.333	0.426	0.129	0.135	0.152	0.172	0.831
TCGA.33.4589.01A.01R.1443.07	0	0	0.211	0.131	0.064	0.088	0.121	0.293	0.157	0.071	0.145	0.048	0.082	0.178	0.159	0.328	0.114	0.165	0.324	0.355	0.139	0.12	0	0.216	0.81
TCGA.33.6737.01A.11R.1820.07	0	0.06	0.225	0.067	0.081	0.114	0.156	0.268	0.157	0.191	0.278	0.054	0	0.183	0.137	0.173	0.066	0.198	0.257	0.38	0.167	0.054	0.123	0.158	0.752
TCGA.33.6737.11A.01R.1820.07	0	0.048	0.274	0.053	0.077	0	0.137	0.227	0.208	0.114	0.41	0.094	0	0.247	0.126	0.158	0.083	0.122	0.241	0.458	0.15	0.134	0.191	0.179	0.781
TCGA.33.6738.01A.11R.1949.07	0	0.088	0.134	0.026	0.083	0.053	0.066	0.157	0.289	0.182	0.298	0.078	0.011	0.115	0.137	0.117	0.182	0.14	0.154	0.33	0.137	0.105	0.117	0.226	0.693
TCGA.33.A4WN.01A.11R.A262.07	0	0.07	0.149	0.025	0.144	0.084	0.11	0.144	0.321	0.099	0.281	0.104	0.023	0.159	0.053	0.157	0.184	0.152	0.142	0.327	0.156	0.042	0.133	0.251	0.741
TCGA.33.A5GW.01A.11R.A27Q.07	0	0.108	0.006	0.032	0.012	0.003	0.044	0.04	0.114	0.199	0.047	0.023	0	0.13	0.133	0.234	0.139	0.173	0.155	0.167	0.229	0.054	0.127	0.128	0.668
TCGA.33.AAS8.01A.11R.A405.07	0	0.05	0.152	0.018	0.082	0.108	0.071	0.144	0.312	0.098	0.222	0.061	0.007	0.233	0.095	0.108	0.205	0.143	0.07	0.347	0.181	0.121	0.16	0.178	0.688
TCGA.33.AASB.01A.11R.A405.07	0	0.052	0.122	0.009	0.029	0.144	0.12	0.115	0.051	0.225	0.121	0.05	0	0.143	0.156	0.093	0.141	0.163	0.062	0.247	0.236	0.069	0.081	0.134	0.57
TCGA.33.AASD.01A.11R.A405.07	0	0.08	0.162	0.097	0.094	0.105	0.121	0.206	0.186	0.128	0.156	0.03	0.017	0.099	0.071	0.226	0.085	0.195	0.197	0.303	0.179	0.062	0.076	0.132	0.688
TCGA.33.AASI.01A.22R.A405.07	0	0.04	0.207	0.086	0.101	0.139	0.18	0.303	0.236	0.057	0.272	0.096	0	0.113	0.063	0.121	0.214	0.09	0.102	0.353	0.095	0.097	0.174	0.215	0.673
TCGA.33.AASJ.01A.11R.A405.07	0	0.059	0.15	0.063	0.065	0.108	0.156	0.281	0.253	0.091	0.212	0	0.095	0.063	0.059	0.147	0.128	0.134	0.13	0.272	0.173	0.112	0.113	0.185	0.633
TCGA.33.AASL.01A.11R.A405.07	0	0	0.247	0.06	0.065	0.05	0.115	0.292	0.269	0.13	0.304	0.031	0.053	0.116	0.132	0.196	0.096	0.201	0.158	0.401	0.146	0.132	0.207	0.181	0.782
TCGA.34.2596.01A.01R.0851.07	0	0.054	0.176	0.029	0.111	0.061	0.238	0.124	0.302	0.028	0.333	0.127	0	0.146	0.097	0.136	0.182	0.106	0.192	0.374	0.127	0.104	0.168	0.208	0.738
TCGA.34.2600.01A.01R.0851.07	0	0.091	0.137	0.057	0.033	0.048	0.093	0.145	0.281	0.104	0.306	0.023	0.058	0.136	0.076	0.144	0.09	0.153	0.138	0.341	0.171	0.09	0.148	0.178	0.673
TCGA.34.2608.01A.02R.0851.07	0	0.103	0.171	0.041	0.133	0.063	0.181	0.142	0.274	0.131	0.294	0.112	0	0.136	0.121	0.225	0.14	0.182	0.309	0.345	0.07	0.089	0.161	0.227	0.82
TCGA.34.5231.01A.21R.1820.07	0	0.135	0.214	0.041	0.115	0.105	0.201	0.237	0.163	0.087	0.228	0.073	0	0.161	0.066	0.165	0.119	0.182	0.162	0.246	0.131	0.108	0.14	0.213	0.671
TCGA.34.5232.01A.21R.1820.07	0	0.098	0.193	0.061	0.176	0.115	0.222	0.253	0.155	0.075	0.415	0.14	0	0.06	0.104	0.196	0.203	0.092	0.14	0.334	0.048	0.079	0.194	0.27	0.729
TCGA.34.5234.01A.01R.1635.07	0	0.084	0.209	0.079	0.097	0.089	0.175	0.217	0.223	0.108	0.337	0.085	0.025	0.18	0.137	0.251	0.099	0.159	0.325	0.407	0.043	0.117	0.126	0.236	0.813
TCGA.34.5236.01A.21R.1820.07	0	0.088	0.166	0.046	0.1	0.051	0.174	0.122	0.266	0.157	0.175	0.053	0	0.208	0.099	0.281	0.12	0.208	0.345	0.291	0.14	0.033	0.09	0.172	0.813
TCGA.34.5239.01A.21R.1820.07	0	0.082	0.251	0.09	0.1	0.049	0.246	0.232	0.24	0.171	0.277	0.082	0	0.146	0.072	0.226	0.12	0.166	0.25	0.354	0.077	0.098	0.154	0.2	0.764
TCGA.34.5240.01A.01R.1443.07	0	0.088	0.118	0.033	0.125	0.052	0.113	0.12	0.316	0.106	0.191	0.104	0	0.136	0.118	0.252	0.156	0.179	0.367	0.277	0.137	0.068	0.043	0.148	0.769
TCGA.34.5241.01A.01R.1443.07	0	0.063	0.243	0.073	0.093	0.075	0.205	0.243	0.229	0.057	0.287	0.101	0.006	0.203	0.129	0.21	0.081	0.193	0.317	0.374	0.081	0.112	0.106	0.193	0.768
TCGA.34.5927.01A.11R.1820.07	0.023	0.131	0.149	0.061	0.068	0.073	0.174	0.193	0.243	0.123	0.133	0.038	0.059	0.116	0.049	0.133	0.115	0.161	0.135	0.254	0.165	0.055	0.13	0.186	0.631
TCGA.34.5928.01A.11R.1820.07	0	0.113	0.206	0.081	0.102	0.102	0.24	0.231	0.26	0.108	0.207	0.057	0	0.159	0.062	0.205	0.071	0.2	0.271	0.292	0.161	0.069	0.107	0.15	0.719
TCGA.34.5929.01A.11R.1820.07	0	0.074	0.183	0.014	0.097	0.086	0.226	0.168	0.243	0.112	0.207	0.062	0	0.135	0.072	0.236	0.133	0.167	0.256	0.234	0.147	0.103	0.133	0.163	0.726
TCGA.34.7107.01A.11R.1949.07	0	0.105	0.142	0.052	0.125	0.081	0.226	0.183	0.27	0.078	0.153	0.025	0.019	0.132	0.09	0.209	0.105	0.201	0.311	0.32	0.167	0.049	0.112	0.178	0.792
TCGA.34.7107.11A.01R.1949.07	0	0.024	0.239	0.072	0.137	0.008	0.145	0.194	0.181	0.092	0.414	0.064	0	0.217	0.132	0.216	0.107	0.187	0.4	0.443	0.148	0.087	0.162	0.157	0.899
TCGA.34.8454.01A.11R.2326.07	0	0.061	0.246	0.085	0.101	0.132	0.23	0.253	0.207	0.081	0.341	0.052	0	0.197	0.095	0.157	0.149	0.136	0.199	0.372	0.12	0.094	0.153	0.268	0.767
TCGA.34.8454.11A.01R.2326.07	0	0.064	0.233	0.055	0.089	0.032	0.172	0.206	0.21	0.133	0.378	0.066	0	0.218	0.152	0.19	0.148	0.128	0.27	0.379	0.088	0.114	0.189	0.215	0.793
TCGA.34.8455.01A.11R.2326.07	0	0.095	0.188	0.031	0.119	0.081	0.155	0.202	0.287	0.152	0.191	0.064	0.034	0.13	0.1	0.192	0.095	0.195	0.16	0.297	0.178	0.057	0.15	0.125	0.687
TCGA.34.8456.01A.21R.2326.07	0	0.157	0.156	0.02	0.121	0.043	0.138	0.146	0.263	0.153	0.101	0.065	0.01	0.157	0.106	0.169	0.163	0.171	0.191	0.226	0.126	0.081	0.17	0.143	0.671
TCGA.34.A5IX.01A.12R.A27Q.07	0	0.045	0.194	0.049	0.043	0.139	0.186	0.191	0.147	0.179	0.091	0.037	0.056	0.152	0.112	0.189	0.099	0.221	0.263	0.21	0.201	0.047	0.081	0.138	0.693
TCGA.37.3783.01A.01R.1201.07	0	0.047	0.263	0.099	0.07	0.135	0.23	0.244	0.109	0.086	0.363	0.081	0.019	0.092	0.143	0.215	0.115	0.14	0.316	0.333	0.117	0.125	0.065	0.245	0.764
TCGA.37.3789.01A.01R.0980.07	0	0.08	0.262	0.111	0.065	0.13	0.232	0.268	0.242	0.072	0.221	0.019	0.05	0.124	0.083	0.221	0.09	0.178	0.292	0.35	0.15	0.024	0.089	0.173	0.762
TCGA.37.3792.01A.01R.0980.07	0	0	0.272	0.086	0.078	0.141	0.237	0.325	0.123	0.042	0.286	0.1	0	0.134	0.072	0.271	0.137	0.182	0.448	0.341	0.162	0.099	0.104	0.164	0.894
TCGA.37.4129.01A.01R.1100.07	0	0.198	0.011	0.005	0.115	0	0	0	0.032	0.13	0	0	0	0.106	0.222	0.153	0.055	0.201	0.223	0.145	0.18	0.102	0.118	0.112	0.586
TCGA.37.4130.01A.01R.1100.07	0	0.023	0.286	0.153	0.095	0.131	0.196	0.279	0.164	0	0.361	0.069	0	0.083	0.17	0.166	0.143	0.178	0.287	0.417	0.05	0.175	0.079	0.342	0.821
TCGA.37.4132.01A.01R.1100.07	0	0.08	0.222	0.123	0.131	0.072	0.165	0.274	0.173	0.033	0.352	0.061	0.026	0.115	0.153	0.174	0.126	0.143	0.266	0.376	0.106	0.112	0.12	0.208	0.751
TCGA.37.4133.01A.01R.1100.07	0	0	0.16	0.099	0.109	0.105	0.144	0.217	0.228	0.052	0.324	0.096	0.062	0.085	0.13	0.196	0.143	0.123	0.292	0.32	0.116	0.137	0.047	0.197	0.709
TCGA.37.4135.01A.01R.1100.07	0	0	0.155	0.101	0.1	0.06	0.117	0.205	0.313	0.064	0.221	0.01	0.067	0.131	0.13	0.235	0.138	0.265	0.296	0.317	0.136	0.126	0.07	0.169	0.803
TCGA.37.4141.01A.02R.1100.07	0	0.12	0.123	0.081	0.1	0.089	0.141	0.233	0.255	0.025	0.303	0.051	0.06	0.185	0.099	0.188	0.134	0.107	0.26	0.261	0.1	0.122	0.143	0.197	0.686
TCGA.37.5819.01A.01R.1635.07	0	0.111	0.215	0.067	0.101	0.075	0.135	0.278	0.124	0.092	0.344	0.075	0	0.141	0.185	0.134	0.175	0.138	0.134	0.302	0.121	0.125	0.121	0.231	0.67
TCGA.37.A5EL.01A.11R.A26W.07	0	0.077	0.164	0.084	0	0.097	0.131	0.148	0.278	0.158	0.184	0	0.013	0.08	0.117	0.116	0.081	0.138	0.046	0.341	0.183	0.177	0.096	0.193	0.59
TCGA.37.A5EM.01A.21R.A27Q.07	0	0.139	0.225	0.077	0.102	0.118	0.223	0.232	0.228	0.046	0.257	0.068	0	0.133	0.082	0.248	0.091	0.223	0.3	0.278	0.12	0.07	0.172	0.191	0.802
TCGA.37.A5EN.01A.21R.A26W.07	0	0.096	0.197	0.048	0.089	0.053	0.092	0.244	0.284	0.056	0.343	0.088	0.029	0.096	0.11	0.144	0.178	0.112	0.095	0.318	0.109	0.085	0.238	0.228	0.702
TCGA.39.5011.01A.01R.1443.07	0	0	0.294	0.108	0.05	0.065	0.085	0.328	0.24	0.113	0.326	0.071	0.004	0.144	0.141	0.239	0.142	0.219	0.321	0.405	0.109	0.123	0.119	0.187	0.859
TCGA.39.5016.01A.01R.1443.07	0	0.07	0.198	0.074	0.084	0.085	0.221	0.265	0.274	0.037	0.318	0.102	0.009	0.119	0.098	0.202	0.141	0.142	0.242	0.358	0.111	0.13	0.133	0.221	0.765
TCGA.39.5019.01A.01R.1820.07	0	0.122	0.177	0.003	0.137	0.077	0.179	0.136	0.292	0.15	0.311	0.114	0	0.102	0.101	0.218	0.131	0.175	0.229	0.329	0.076	0.123	0.165	0.194	0.749
TCGA.39.5021.01A.01R.1443.07	0	0.076	0.215	0.091	0.12	0.053	0.202	0.268	0.223	0.056	0.316	0.094	0.023	0.08	0.128	0.229	0.132	0.17	0.266	0.392	0.096	0.114	0.113	0.215	0.796
TCGA.39.5022.01A.21R.1820.07	0	0.06	0.262	0.127	0.119	0.082	0.178	0.289	0.194	0.083	0.33	0.108	0	0.143	0.11	0.188	0.159	0.118	0.249	0.378	0.058	0.104	0.164	0.258	0.776
TCGA.39.5024.01A.21R.1820.07	0	0.096	0.183	0.026	0.084	0.066	0.126	0.168	0.3	0.13	0.325	0.117	0.023	0.094	0.084	0.188	0.155	0.187	0.134	0.289	0.112	0.087	0.2	0.197	0.722
TCGA.39.5027.01A.21R.1820.07	0	0.14	0.094	0.052	0	0.081	0.062	0.132	0.265	0.19	0.046	0	0	0.112	0.088	0.148	0.104	0.166	0.082	0.249	0.213	0.102	0.123	0.157	0.614
TCGA.39.5028.01A.01R.1443.07	0	0.085	0.215	0.05	0.119	0.077	0.181	0.179	0.169	0.185	0.263	0.089	0.004	0.13	0.068	0.188	0.114	0.195	0.262	0.303	0.115	0.084	0.147	0.202	0.753
TCGA.39.5029.01A.01R.1443.07	0	0.117	0.228	0.076	0.094	0.078	0.2	0.308	0.288	0.042	0.235	0.057	0	0.067	0.122	0.248	0.156	0.163	0.223	0.378	0.084	0.12	0.088	0.209	0.765
TCGA.39.5030.01A.01R.1443.07	0	0.053	0.276	0.118	0.172	0.084	0.229	0.255	0.215	0.073	0.329	0.096	0	0.124	0.074	0.257	0.167	0.146	0.265	0.356	0.071	0.116	0.148	0.241	0.815
TCGA.39.5031.01A.01R.1443.07	0	0.108	0.172	0.045	0.122	0.074	0.192	0.198	0.278	0.126	0.359	0.123	0.008	0.089	0.093	0.194	0.137	0.146	0.244	0.327	0.084	0.078	0.157	0.2	0.735
TCGA.39.5034.01A.01R.1443.07	0	0.124	0.216	0.046	0.132	0.103	0.183	0.166	0.137	0.163	0.288	0.141	0	0.037	0.108	0.209	0.15	0.184	0.222	0.293	0.118	0.058	0.127	0.181	0.733
TCGA.39.5035.01A.01R.1443.07	0	0.031	0.284	0.115	0.092	0.065	0.202	0.277	0.189	0.059	0.367	0.108	0.021	0.098	0.027	0.177	0.126	0.193	0.222	0.364	0.09	0.141	0.137	0.233	0.761
TCGA.39.5036.01A.01R.1443.07	0	0.039	0.154	0.068	0.085	0.068	0.132	0.22	0.298	0.096	0.23	0.059	0.027	0.129	0.084	0.212	0.169	0.151	0.196	0.314	0.178	0.091	0.009	0.193	0.703
TCGA.39.5037.01A.01R.1443.07	0	0.139	0.037	0.029	0	0.023	0.02	0.129	0.188	0.197	0.156	0.038	0.007	0.123	0.091	0.142	0.178	0.135	0.049	0.233	0.209	0.057	0.07	0.156	0.579
TCGA.39.5039.01A.01R.1443.07	0	0.083	0.167	0.048	0.095	0.037	0.098	0.165	0.259	0.146	0.254	0.092	0.018	0.15	0.146	0.198	0.12	0.175	0.254	0.329	0.1	0.102	0.127	0.163	0.724
TCGA.39.5040.01A.21R.2125.07	0	0.089	0.145	0.005	0.143	0.167	0.189	0.144	0.242	0.078	0.336	0.09	0	0.111	0.022	0.134	0.172	0.144	0.184	0.271	0.155	0.069	0.15	0.251	0.722
TCGA.39.5040.11A.01R.2125.07	0	0.061	0.263	0.025	0.051	0	0.07	0.183	0.224	0.125	0.394	0.024	0.014	0.223	0.185	0.182	0.077	0.161	0.317	0.462	0.157	0.157	0.157	0.175	0.834
TCGA.43.2576.01A.01R.A32Z.07	0	0.038	0.247	0.105	0.108	0.097	0.144	0.276	0.173	0.107	0.317	0.058	0	0.091	0.114	0.21	0.137	0.217	0.347	0.325	0.107	0.094	0.149	0.237	0.854
TCGA.43.2578.01A.01R.0851.07	0.009	0.133	0.28	0.071	0.089	0.059	0.212	0.243	0.215	0.064	0.211	0.06	0	0.108	0.104	0.21	0.122	0.17	0.252	0.337	0.111	0.091	0.13	0.181	0.747
TCGA.43.2581.01A.01R.0851.07	0	0.053	0.234	0.086	0.118	0.108	0.209	0.228	0.152	0.122	0.27	0.065	0	0.093	0.132	0.212	0.112	0.242	0.375	0.3	0.142	0.081	0.094	0.162	0.809
TCGA.43.3394.01A.01R.0980.07	0	0.074	0.106	0.006	0.119	0.076	0.176	0.098	0.275	0.158	0.235	0.055	0.026	0.155	0.114	0.25	0.081	0.195	0.26	0.247	0.145	0.056	0.153	0.176	0.744
TCGA.43.3394.11A.01R.1758.07	0	0.016	0.239	0.029	0.039	0.002	0.123	0.158	0.227	0.184	0.357	0.025	0	0.276	0.156	0.227	0.078	0.177	0.344	0.446	0.174	0.108	0.152	0.119	0.848
TCGA.43.3920.01A.01R.0980.07	0	0.105	0.171	0.106	0.099	0.06	0.162	0.212	0.273	0.115	0.284	0.068	0.069	0.096	0.121	0.232	0.089	0.195	0.263	0.326	0.095	0.109	0.096	0.183	0.731
TCGA.43.5668.01A.01R.1635.07	0	0.017	0.243	0.101	0.118	0.102	0.216	0.257	0.202	0.082	0.312	0.102	0	0.072	0.151	0.185	0.155	0.131	0.293	0.431	0.087	0.148	0.112	0.238	0.805
TCGA.43.5670.01A.21R.2125.07	0.048	0.16	0.061	0.03	0	0.063	0	0.077	0.244	0.213	0.034	0.004	0	0.144	0.096	0.156	0.078	0.142	0.072	0.19	0.253	0.061	0.119	0.12	0.559
TCGA.43.5670.11A.01R.2125.07	0	0.083	0.24	0.035	0.069	0	0.181	0.221	0.201	0.137	0.36	0.052	0	0.232	0.131	0.15	0.076	0.169	0.293	0.414	0.156	0.115	0.215	0.151	0.802
TCGA.43.6143.01A.11R.1820.07	0	0.136	0.139	0.028	0.112	0.089	0.188	0.166	0.253	0.121	0.122	0.032	0.02	0.108	0.062	0.154	0.211	0.18	0.215	0.316	0.159	0.054	0.126	0.124	0.733
TCGA.43.6143.11A.01R.1820.07	0	0.045	0.255	0.04	0.128	0	0.125	0.115	0.219	0.144	0.391	0.056	0	0.206	0.139	0.188	0.166	0.171	0.327	0.389	0.105	0.129	0.201	0.206	0.865
TCGA.43.6647.01A.11R.1820.07	0	0.08	0.178	0.061	0.154	0.064	0.223	0.147	0.272	0.101	0.223	0.074	0	0.195	0.084	0.222	0.115	0.239	0.28	0.307	0.127	0.051	0.165	0.176	0.805
TCGA.43.6647.11A.01R.1820.07	0	0.028	0.265	0.015	0.058	0.008	0.098	0.133	0.23	0.16	0.36	0.019	0	0.245	0.155	0.143	0.061	0.193	0.326	0.436	0.225	0.145	0.163	0.155	0.841
TCGA.43.6770.01A.11R.1820.07	0	0.114	0.108	0.044	0.146	0.038	0.158	0.077	0.284	0.177	0.114	0.035	0	0.18	0.138	0.265	0.097	0.23	0.275	0.225	0.149	0.064	0.095	0.184	0.751
TCGA.43.6771.01A.11R.1820.07	0	0.115	0.21	0.013	0.08	0.121	0.219	0.222	0.192	0.184	0.233	0.078	0	0.104	0.114	0.193	0.074	0.227	0.227	0.264	0.132	0.051	0.129	0.136	0.682
TCGA.43.6771.11A.01R.1820.07	0	0.052	0.198	0.08	0.062	0.041	0.153	0.213	0.209	0.135	0.396	0.036	0	0.192	0.126	0.201	0.068	0.157	0.376	0.428	0.19	0.103	0.143	0.114	0.828
TCGA.43.6773.01A.41R.1949.07	0	0.016	0.234	0.078	0.149	0.005	0.16	0.21	0.227	0.059	0.407	0.117	0	0.132	0.158	0.175	0.156	0.126	0.29	0.427	0.074	0.135	0.191	0.215	0.817
TCGA.43.6773.11A.01R.1949.07	0	0.029	0.289	0.035	0.086	0	0.144	0.14	0.205	0.12	0.307	0.044	0	0.22	0.097	0.195	0.059	0.221	0.384	0.426	0.222	0.147	0.186	0.122	0.897
TCGA.43.7656.01A.11R.2125.07	0	0.077	0.219	0.08	0.111	0.082	0.231	0.277	0.251	0.021	0.32	0.13	0	0.144	0.068	0.111	0.2	0.165	0.196	0.307	0.109	0.092	0.175	0.225	0.735
TCGA.43.7657.01A.31R.2125.07	0.006	0.116	0.154	0.028	0.152	0.017	0.008	0.159	0.274	0.097	0.112	0.009	0	0.123	0.099	0.212	0.137	0.181	0.253	0.284	0.168	0.037	0.093	0.141	0.725
TCGA.43.7657.11A.01R.2125.07	0	0.036	0.232	0.019	0.08	0.018	0.096	0.181	0.225	0.154	0.363	0.058	0	0.259	0.149	0.167	0.132	0.172	0.302	0.374	0.174	0.135	0.187	0.197	0.842
TCGA.43.7658.01A.11R.2125.07	0	0.125	0.228	0.106	0.088	0.135	0.191	0.288	0.203	0.052	0.29	0.075	0.014	0.069	0.043	0.136	0.099	0.145	0.224	0.214	0.123	0.135	0.15	0.288	0.681
TCGA.43.7658.11A.01R.2125.07	0	0.037	0.213	0.036	0.009	0.004	0.098	0.2	0.223	0.17	0.365	0.035	0	0.245	0.149	0.202	0.11	0.165	0.32	0.375	0.177	0.137	0.185	0.179	0.845
TCGA.43.8115.01A.11R.2247.07	0	0.093	0.255	0.064	0.14	0.078	0.24	0.237	0.229	0.051	0.324	0.097	0	0.137	0.065	0.242	0.11	0.201	0.291	0.323	0.081	0.095	0.188	0.214	0.815
TCGA.43.8116.01A.11R.2247.07	0	0.034	0.192	0.068	0.143	0.091	0.197	0.227	0.282	0.108	0.298	0.109	0.021	0.072	0.08	0.207	0.172	0.24	0.155	0.29	0.124	0.088	0.139	0.215	0.761
TCGA.43.8118.01A.11R.2403.07	0	0.105	0.156	0.066	0.108	0.066	0.213	0.182	0.129	0.157	0.119	0.033	0.015	0.147	0.088	0.276	0.069	0.264	0.359	0.19	0.162	0.084	0.134	0.128	0.782
TCGA.43.A474.01A.11R.A24H.07	0	0.086	0	0.032	0.05	0.04	0.099	0.055	0.095	0.167	0.011	0.016	0	0.185	0	0.16	0.102	0.209	0.092	0.154	0.24	0.094	0.043	0.074	0.531
TCGA.43.A475.01A.11R.A24H.07	0	0.017	0.289	0.124	0.097	0.083	0.235	0.277	0.199	0.039	0.354	0.067	0	0.119	0.055	0.215	0.089	0.162	0.286	0.378	0.112	0.149	0.162	0.284	0.834
TCGA.43.A56U.01A.11R.A26W.07	0	0.071	0.24	0.097	0.181	0.055	0.202	0.238	0.176	0.064	0.417	0.111	0	0.104	0.064	0.061	0.216	0.109	0.17	0.425	0.038	0.12	0.257	0.239	0.748
TCGA.43.A56V.01A.11R.A26W.07	0	0.11	0.108	0.049	0.104	0.039	0.14	0.25	0.152	0.148	0.183	0.073	0.063	0.199	0.082	0.156	0.148	0.229	0.193	0.209	0.155	0.055	0.153	0.132	0.68
TCGA.46.3765.01A.01R.0980.07	0	0.041	0.175	0.056	0.129	0.069	0.208	0.212	0.282	0.135	0.206	0.089	0.017	0.118	0.097	0.206	0.121	0.161	0.253	0.361	0.124	0.114	0.133	0.145	0.743
TCGA.46.3766.01A.01R.0980.07	0	0.085	0.207	0.077	0.131	0.064	0.193	0.21	0.237	0.107	0.32	0.121	0	0.137	0.115	0.288	0.148	0.154	0.297	0.344	0.067	0.11	0.165	0.206	0.825
TCGA.46.3767.01A.01R.0980.07	0	0.066	0.2	0.046	0.137	0.048	0.166	0.156	0.238	0.104	0.372	0.128	0	0.155	0.118	0.236	0.17	0.163	0.273	0.331	0.076	0.098	0.188	0.187	0.802
TCGA.46.3768.01A.01R.0980.07	0	0.063	0.115	0.003	0.063	0.124	0.185	0.148	0.312	0.121	0.157	0.07	0	0.072	0.136	0.247	0.132	0.177	0.326	0.314	0.189	0.074	0.073	0.153	0.796
TCGA.46.3769.01A.01R.0980.07	0	0.042	0.13	0.082	0.074	0.097	0.262	0.232	0.249	0.139	0.212	0.094	0.01	0.129	0.032	0.243	0.083	0.2	0.337	0.365	0.124	0.108	0.06	0.183	0.788
TCGA.46.6025.01A.11R.1820.07	0	0.039	0.154	0.063	0.024	0.104	0.21	0.272	0.262	0.134	0.053	0.007	0.059	0.142	0.073	0.23	0.084	0.194	0.211	0.346	0.176	0.072	0.053	0.164	0.719
TCGA.46.6026.01A.11R.1820.07	0	0.143	0.169	0.019	0.045	0.021	0.124	0.071	0.294	0.151	0.128	0.007	0.012	0.186	0.051	0.076	0.163	0.168	0.085	0.262	0.182	0.097	0.178	0.24	0.668
TCGA.51.4079.01A.01R.1100.07	0	0.049	0.146	0.063	0.076	0.086	0.141	0.192	0.275	0.141	0.195	0.122	0.002	0.175	0.135	0.236	0.129	0.173	0.265	0.323	0.137	0.049	0.06	0.156	0.731
TCGA.51.4079.11A.01R.1758.07	0	0.059	0.175	0.02	0.04	0	0.065	0.142	0.233	0.182	0.35	0.024	0	0.269	0.123	0.185	0.122	0.176	0.271	0.405	0.165	0.138	0.175	0.114	0.796
TCGA.51.4080.01A.01R.1100.07	0	0.074	0.105	0.041	0.113	0.178	0.152	0.108	0.303	0.134	0.048	0.049	0	0.095	0.076	0.244	0.098	0.177	0.284	0.263	0.2	0.028	0.089	0.167	0.752
TCGA.51.4080.11A.01R.1758.07	0	0.041	0.23	0.053	0.078	0.082	0.17	0.2	0.207	0.11	0.332	0.029	0	0.264	0.136	0.199	0.089	0.172	0.35	0.401	0.174	0.114	0.17	0.197	0.865
TCGA.51.4081.01A.01R.1100.07	0.008	0.153	0.091	0.031	0.091	0.082	0.084	0.067	0.199	0.165	0	0.04	0	0.139	0.108	0.208	0.118	0.222	0.194	0.191	0.202	0.036	0.093	0.122	0.666
TCGA.51.4081.11A.01R.1758.07	0	0.008	0.25	0.074	0.105	0.007	0.109	0.199	0.182	0.124	0.411	0.039	0	0.228	0.134	0.191	0.087	0.169	0.382	0.397	0.16	0.135	0.199	0.183	0.874
TCGA.51.6867.01A.11R.2045.07	0	0.101	0.236	0.108	0.081	0.059	0.193	0.248	0.304	0.074	0.347	0.091	0	0.065	0.099	0.121	0.096	0.081	0.186	0.375	0.15	0.104	0.115	0.201	0.654
TCGA.52.7622.01A.11R.2125.07	0	0.091	0.241	0.079	0.101	0.061	0.203	0.273	0.238	0.086	0.315	0.069	0	0.164	0.118	0.228	0.114	0.151	0.297	0.441	0.116	0.068	0.143	0.167	0.818
TCGA.52.7809.01A.21R.2125.07	0	0.127	0.176	0.049	0.088	0.053	0.106	0.153	0.246	0.126	0.339	0.077	0.04	0.134	0.092	0.11	0.142	0.183	0.161	0.233	0.112	0.084	0.163	0.202	0.645
TCGA.52.7810.01A.11R.2125.07	0.033	0.136	0.024	0.063	0.024	0.046	0.025	0.041	0.096	0.105	0	0.041	0	0.16	0.101	0.214	0.099	0.198	0.177	0.173	0.244	0.062	0.06	0.073	0.611
TCGA.52.7811.01A.11R.2125.07	0	0.097	0.172	0.076	0.097	0.079	0.166	0.179	0.178	0.148	0.126	0.036	0.009	0.148	0.169	0.236	0.102	0.219	0.312	0.309	0.134	0.061	0.103	0.131	0.764
TCGA.52.7812.01A.11R.2125.07	0	0.006	0.216	0.146	0.08	0.08	0.127	0.34	0.268	0.09	0.311	0.101	0.031	0.036	0.042	0.224	0.131	0.174	0.274	0.358	0.118	0.125	0.138	0.206	0.801
TCGA.56.1622.01A.01R.0692.07	0	0.113	0.12	0.027	0.059	0.071	0.103	0.115	0.2	0.194	0.031	0.057	0	0.115	0.057	0.161	0.087	0.214	0.18	0.22	0.188	0.092	0.085	0.12	0.619
TCGA.56.5897.01A.11R.1635.07	0	0.085	0.217	0.04	0.151	0.06	0.211	0.173	0.239	0.069	0.268	0.104	0	0.175	0.125	0.201	0.136	0.222	0.325	0.356	0.117	0.058	0.148	0.185	0.835
TCGA.56.5898.01A.11R.1635.07	0	0.112	0.187	0.045	0.093	0.042	0.173	0.244	0.224	0.149	0.236	0.059	0	0.18	0.103	0.236	0.108	0.178	0.287	0.333	0.126	0.068	0.117	0.147	0.757
TCGA.56.6545.01A.11R.1820.07	0	0.086	0.197	0.086	0.127	0.09	0.224	0.219	0.254	0.11	0.269	0.101	0	0.186	0.039	0.21	0.102	0.185	0.312	0.337	0.129	0.053	0.149	0.171	0.788
TCGA.56.6546.01A.11R.1820.07	0	0.123	0.294	0.095	0.098	0.052	0.173	0.304	0.236	0.059	0.351	0.086	0	0.115	0.015	0.244	0.129	0.13	0.286	0.354	0.113	0.121	0.134	0.257	0.813
TCGA.56.7221.01A.11R.2045.07	0	0.102	0.031	0.04	0.035	0.028	0.068	0.096	0.207	0.209	0.02	0.031	0.009	0.191	0.053	0.211	0.147	0.196	0.227	0.181	0.211	0.082	0.127	0.129	0.705
TCGA.56.7222.01A.11R.2045.07	0	0.041	0	0.013	0.117	0.043	0.11	0.137	0	0.212	0.085	0.057	0	0.148	0	0.206	0.151	0.194	0.128	0.107	0.23	0.053	0.064	0	0.534
TCGA.56.7222.11A.01R.2045.07	0	0.015	0.173	0	0	0	0.021	0.151	0.233	0.201	0.324	0	0	0.257	0.174	0.213	0.069	0.249	0.342	0.38	0.222	0.087	0.096	0.123	0.837
TCGA.56.7223.01A.11R.2045.07	0	0.169	0.096	0.015	0	0.051	0.097	0.041	0.134	0.09	0.031	0.023	0	0.158	0.102	0.088	0.273	0.126	0.119	0.204	0.225	0.059	0.071	0.164	0.627
TCGA.56.7579.01A.11R.2045.07	0	0.083	0.103	0.047	0.108	0.081	0.107	0.136	0.104	0.161	0	0.031	0	0.111	0.057	0.326	0.115	0.238	0.354	0.285	0.221	0.035	0.039	0.077	0.817
TCGA.56.7579.11A.01R.2045.07	0	0.026	0.301	0.043	0.046	0	0.041	0.223	0.234	0.118	0.382	0.075	0	0.214	0.153	0.187	0.08	0.173	0.316	0.449	0.158	0.139	0.202	0.172	0.858
TCGA.56.7580.01A.11R.2045.07	0	0.115	0.216	0.047	0.122	0.051	0.155	0.234	0.228	0.094	0.208	0.108	0.026	0.099	0.061	0.166	0.145	0.205	0.183	0.242	0.167	0.068	0.08	0.173	0.672
TCGA.56.7580.11A.01R.2045.07	0	0.06	0.241	0.072	0.05	0	0.089	0.247	0.238	0.18	0.312	0.024	0.014	0.215	0.137	0.215	0.105	0.179	0.355	0.387	0.153	0.106	0.167	0.143	0.842
TCGA.56.7582.01A.11R.2045.07	0	0.079	0.193	0.081	0.081	0.078	0.176	0.236	0.261	0.149	0.135	0.037	0.048	0.103	0.103	0.237	0.1	0.18	0.308	0.317	0.152	0.053	0.098	0.129	0.752
TCGA.56.7582.11A.01R.2045.07	0	0.054	0.235	0.049	0.086	0	0.09	0.23	0.222	0.133	0.33	0.06	0.004	0.22	0.146	0.191	0.106	0.196	0.301	0.358	0.131	0.119	0.223	0.142	0.814
TCGA.56.7730.01A.11R.2125.07	0	0.112	0.037	0.018	0.008	0.039	0.064	0.13	0.287	0.152	0.152	0.06	0.016	0.149	0.088	0.113	0.129	0.168	0.115	0.215	0.226	0.065	0.119	0.143	0.607
TCGA.56.7730.11A.01R.2125.07	0	0.063	0.149	0.02	0	0	0.06	0.115	0.24	0.191	0.215	0	0	0.297	0.157	0.206	0.046	0.186	0.305	0.404	0.231	0.125	0.176	0.116	0.825
TCGA.56.7731.01A.11R.2125.07	0	0.066	0.17	0.029	0.11	0.026	0.148	0.146	0.215	0.162	0.352	0.081	0	0.23	0.127	0.201	0.112	0.209	0.297	0.326	0.131	0.097	0.147	0.173	0.788
TCGA.56.7731.11A.01R.2125.07	0	0	0.28	0.043	0	0.005	0.065	0.162	0.241	0.197	0.298	0	0	0.223	0.164	0.204	0	0.194	0.354	0.481	0.255	0.151	0.091	0.162	0.86
TCGA.56.7822.01A.11R.2125.07	0	0.111	0.159	0.012	0.086	0.15	0.1	0.12	0.234	0.134	0.094	0.004	0	0.212	0.127	0.262	0.101	0.213	0.281	0.266	0.177	0.063	0.096	0.164	0.771
TCGA.56.7823.01B.11R.2247.07	0	0.094	0.158	0.077	0.027	0.097	0.17	0.23	0.212	0.154	0.003	0.024	0.019	0.15	0.067	0.188	0.1	0.211	0.184	0.244	0.205	0.071	0.088	0.16	0.681
TCGA.56.7823.11A.01R.2247.07	0	0.045	0.228	0.036	0.075	0.009	0.124	0.188	0.235	0.127	0.362	0.055	0	0.224	0.149	0.204	0.102	0.195	0.337	0.426	0.169	0.099	0.206	0.125	0.871
TCGA.56.8082.01A.11R.2247.07	0.022	0.12	0.119	0.002	0.101	0.042	0.153	0.126	0.138	0.168	0.137	0.081	0	0.098	0.129	0.2	0.106	0.192	0.164	0.124	0.174	0.074	0.124	0.112	0.591
TCGA.56.8082.11A.01R.2247.07	0	0.032	0.287	0.04	0.048	0.036	0.142	0.153	0.215	0.159	0.374	0.016	0	0.229	0.112	0.096	0.038	0.187	0.265	0.479	0.237	0.164	0.172	0.134	0.794
TCGA.56.8083.01A.11R.2247.07	0	0.2	0.099	0.037	0.104	0.048	0.102	0.172	0.045	0.168	0.088	0	0	0.085	0.112	0.075	0.146	0.19	0.107	0.205	0.182	0	0.164	0.132	0.593
TCGA.56.8083.11A.01R.2247.07	0	0.018	0.264	0.003	0.011	0	0.083	0.14	0.234	0.179	0.34	0.032	0	0.263	0.161	0.163	0.091	0.2	0.298	0.44	0.199	0.157	0.174	0.139	0.841
TCGA.56.8201.01A.11R.2247.07	0	0.045	0.25	0.103	0.092	0.074	0.221	0.292	0.231	0.104	0.298	0.071	0	0.141	0.048	0.233	0.104	0.203	0.388	0.383	0.12	0.096	0.136	0.175	0.86
TCGA.56.8201.11A.01R.2247.07	0	0.038	0.276	0.033	0.062	0	0.161	0.143	0.191	0.167	0.406	0.028	0	0.238	0.132	0.174	0.052	0.174	0.318	0.437	0.209	0.119	0.19	0.127	0.831
TCGA.56.8304.01A.11R.2326.07	0	0.045	0.23	0.088	0.103	0.077	0.115	0.288	0.214	0.15	0.231	0.039	0.072	0.109	0.048	0.197	0.168	0.189	0.171	0.339	0.109	0.108	0.081	0.233	0.734
TCGA.56.8305.01A.11R.2296.07	0	0.063	0.139	0.041	0.133	0.02	0.094	0.165	0.311	0.143	0.21	0.105	0	0.159	0.079	0.221	0.141	0.205	0.21	0.196	0.155	0.01	0.11	0.191	0.705
TCGA.56.8307.01A.11R.2296.07	0	0.029	0.281	0.108	0.113	0.169	0.26	0.295	0.272	0.029	0.191	0.036	0.036	0.037	0	0.213	0.191	0.208	0.227	0.34	0.152	0.084	0.13	0.196	0.818
TCGA.56.8308.01A.11R.2296.07	0	0.1	0.165	0.021	0.131	0.06	0.191	0.12	0.265	0.108	0.28	0.118	0	0.184	0.092	0.22	0.164	0.154	0.199	0.301	0.11	0.044	0.178	0.166	0.736
TCGA.56.8309.01A.11R.2296.07	0	0.07	0.259	0.099	0.159	0.093	0.203	0.242	0.228	0.059	0.331	0.108	0	0.092	0.101	0.178	0.104	0.164	0.278	0.366	0.084	0.116	0.18	0.259	0.797
TCGA.56.8309.11A.01R.2296.07	0	0.024	0.227	0.018	0.076	0	0.102	0.178	0.209	0.151	0.315	0.047	0	0.303	0.139	0.205	0.082	0.175	0.342	0.364	0.176	0.128	0.202	0.156	0.841
TCGA.56.8503.01A.11R.2403.07	0	0.09	0.212	0.094	0.113	0.09	0.204	0.224	0.188	0.106	0.256	0.025	0	0.179	0.109	0.223	0.094	0.253	0.34	0.346	0.135	0.062	0.143	0.18	0.846
TCGA.56.8504.01A.11R.2403.07	0	0.113	0.206	0.067	0.093	0.08	0.238	0.276	0.2	0.054	0.238	0.073	0.01	0.046	0.141	0.204	0.133	0.2	0.281	0.33	0.118	0.103	0.114	0.19	0.775
TCGA.56.8622.01A.11R.2403.07	0	0.113	0.113	0.023	0.126	0.059	0.168	0.074	0.216	0.214	0.104	0.029	0.034	0.213	0.118	0.166	0.159	0.221	0.245	0.239	0.147	0.032	0.114	0.216	0.744
TCGA.56.8623.01A.11R.A28V.07	0	0.037	0.276	0.037	0.075	0.015	0.101	0.176	0.207	0.125	0.398	0.023	0	0.259	0.151	0.183	0.105	0.156	0.36	0.445	0.146	0.14	0.2	0.177	0.876
TCGA.56.8623.11A.01R.A28V.07	0	0.045	0.292	0.034	0.082	0.033	0.15	0.197	0.21	0.117	0.403	0.025	0	0.227	0.159	0.166	0.107	0.163	0.319	0.449	0.143	0.132	0.199	0.209	0.866
TCGA.56.8624.01A.11R.2403.07	0	0.128	0.142	0.013	0.098	0.04	0.091	0.158	0.204	0.216	0.298	0.079	0	0.167	0.157	0.133	0.146	0.153	0.158	0.276	0.101	0.056	0.232	0.207	0.695
TCGA.56.8625.01A.11R.2403.07	0	0.078	0.281	0.102	0.115	0.082	0.221	0.266	0.202	0.031	0.316	0.085	0	0.18	0.078	0.183	0.145	0.153	0.348	0.362	0.089	0.099	0.143	0.235	0.819
TCGA.56.8626.01A.11R.2403.07	0	0.11	0.146	0.033	0.072	0.041	0.138	0.143	0.249	0.144	0.243	0.026	0	0.169	0.114	0.199	0.1	0.243	0.249	0.315	0.147	0.059	0.178	0.126	0.77
TCGA.56.8628.01A.11R.2403.07	0	0.109	0.185	0.073	0.108	0.048	0.167	0.228	0.226	0.082	0.319	0.086	0	0.167	0.087	0.262	0.122	0.187	0.307	0.324	0.082	0.086	0.203	0.199	0.833
TCGA.56.8629.01A.11R.2403.07	0	0.097	0.135	0.058	0.041	0.103	0.252	0.149	0.226	0.186	0.133	0	0.006	0.099	0.079	0.181	0.099	0.221	0.236	0.252	0.173	0.122	0.053	0.168	0.683
TCGA.56.A49D.01A.11R.A24H.07	0	0.108	0.242	0.066	0.094	0.054	0.256	0.275	0.23	0.073	0.376	0.045	0	0.113	0.056	0.208	0.089	0.152	0.263	0.423	0.083	0.128	0.161	0.194	0.777
TCGA.56.A4BW.01A.11R.A24H.07	0	0.102	0.198	0.085	0.101	0.08	0.205	0.246	0.238	0.117	0.224	0.039	0.054	0.106	0.059	0.217	0.111	0.223	0.205	0.297	0.117	0.102	0.132	0.174	0.729
TCGA.56.A4BX.01A.11R.A24H.07	0	0.137	0	0	0.076	0	0	0	0	0.161	0.004	0	0	0.16	0	0.175	0.174	0.208	0.167	0.138	0.244	0.028	0.12	0.129	0.67
TCGA.56.A4BY.01A.11R.A24H.07	0	0.097	0.152	0.035	0.1	0.061	0.178	0.237	0.26	0.121	0.269	0.079	0.015	0.154	0.109	0.116	0.13	0.141	0.174	0.287	0.146	0.058	0.189	0.163	0.665
TCGA.56.A4ZJ.01A.11R.A262.07	0	0.086	0.22	0.047	0.085	0.025	0.16	0.169	0.243	0.131	0.299	0.036	0	0.184	0.121	0.253	0.074	0.249	0.35	0.363	0.115	0.089	0.217	0.099	0.849
TCGA.56.A4ZK.01A.11R.A262.07	0	0.066	0.231	0.095	0.096	0.07	0.188	0.276	0.232	0.058	0.262	0.044	0.018	0.164	0.1	0.275	0.101	0.2	0.302	0.363	0.151	0.073	0.126	0.156	0.827
TCGA.56.A5DR.01A.11R.A27Q.07	0	0.103	0.194	0.114	0.078	0.11	0.217	0.274	0.115	0.074	0.159	0.024	0	0.106	0.107	0.193	0.096	0.234	0.253	0.305	0.165	0.072	0.063	0.112	0.702
TCGA.56.A5DS.01A.11R.A27Q.07	0	0.121	0.181	0.012	0.117	0.053	0.179	0.188	0.269	0.123	0.344	0.112	0.005	0.123	0.053	0.111	0.165	0.133	0.126	0.331	0.135	0.101	0.213	0.205	0.701
TCGA.56.A62T.01A.11R.A405.07	0	0.092	0.141	0.057	0.084	0.077	0.215	0.146	0.28	0.066	0.013	0.012	0.029	0.141	0.12	0.269	0.159	0.173	0.286	0.338	0.146	0.078	0.094	0.13	0.788
TCGA.58.8386.01A.11R.2296.07	0	0.063	0.204	0.049	0.089	0.069	0.153	0.149	0.199	0.1	0.275	0.057	0	0.203	0.112	0.269	0.109	0.214	0.378	0.366	0.163	0.061	0.118	0.156	0.876
TCGA.58.8386.11A.01R.2296.07	0	0.046	0.235	0.079	0.101	0	0.152	0.204	0.172	0.131	0.442	0.065	0	0.222	0.129	0.175	0.153	0.124	0.308	0.384	0.117	0.126	0.194	0.185	0.81
TCGA.58.8387.01A.11R.2296.07	0	0.052	0.243	0.067	0.121	0.078	0.211	0.254	0.24	0.125	0.364	0.104	0.046	0.066	0.071	0.201	0.169	0.133	0.184	0.348	0.102	0.153	0.117	0.246	0.741
TCGA.58.8388.01A.11R.2326.07	0	0.103	0.178	0.119	0.097	0.125	0.197	0.228	0.239	0.104	0.333	0.061	0	0.118	0.08	0.192	0.126	0.228	0.256	0.271	0.12	0.06	0.181	0.184	0.769
TCGA.58.8390.01A.11R.2326.07	0	0.153	0.146	0.054	0.089	0.143	0.258	0.095	0.181	0.152	0.089	0	0.025	0.094	0.051	0.202	0.069	0.264	0.257	0.232	0.184	0.084	0.117	0.133	0.72
TCGA.58.8391.01A.11R.2326.07	0	0.094	0.121	0.06	0.048	0.097	0.167	0.157	0.255	0.161	0.133	0.019	0.027	0.124	0.115	0.146	0.088	0.22	0.162	0.314	0.201	0.073	0.106	0.151	0.686
TCGA.58.8392.01A.11R.2326.07	0	0.105	0.104	0.012	0.076	0.01	0.029	0.113	0.293	0.264	0.07	0.022	0.012	0.167	0.11	0.162	0.12	0.205	0.132	0.261	0.174	0.073	0.173	0.168	0.689
TCGA.58.8393.01A.11R.2326.07	0	0.065	0.251	0.099	0.104	0.049	0.191	0.288	0.198	0.06	0.34	0.089	0	0.147	0.115	0.198	0.133	0.168	0.281	0.377	0.134	0.121	0.142	0.192	0.802
TCGA.58.A46J.01A.11R.A24H.07	0	0.097	0.178	0.01	0.101	0.064	0.188	0.168	0.212	0.083	0.341	0.061	0	0.152	0.089	0.197	0.127	0.198	0.266	0.295	0.13	0.125	0.172	0.184	0.776
TCGA.58.A46K.01A.11R.A24H.07	0	0.102	0.212	0.079	0.096	0.057	0.186	0.306	0.273	0.08	0.204	0.07	0.038	0.071	0.083	0.116	0.136	0.134	0.149	0.367	0.161	0.096	0.147	0.178	0.685
TCGA.58.A46L.01A.11R.A24H.07	0	0.073	0.23	0.073	0.097	0.066	0.22	0.311	0.2	0.063	0.321	0.135	0.017	0.057	0.08	0.172	0.074	0.151	0.224	0.294	0.115	0.133	0.176	0.226	0.707
TCGA.58.A46M.01A.11R.A24H.07	0	0.032	0.242	0.099	0.076	0.09	0.17	0.297	0.26	0.055	0.254	0.022	0.039	0.126	0.086	0.243	0.091	0.151	0.252	0.389	0.166	0.137	0.096	0.186	0.777
TCGA.58.A46N.01A.11R.A24H.07	0	0.04	0.115	0.063	0.03	0.09	0.121	0.229	0.261	0.163	0.116	0.021	0.065	0.064	0.096	0.159	0.094	0.131	0.129	0.29	0.184	0.11	0.151	0.185	0.654
TCGA.60.2695.01A.01R.0851.07	0	0.104	0.217	0.078	0.11	0.071	0.162	0.265	0.204	0.067	0.326	0.105	0.008	0.098	0.056	0.173	0.157	0.191	0.255	0.285	0.118	0.123	0.141	0.197	0.75
TCGA.60.2696.01A.01R.0851.07	0	0.071	0.175	0.045	0.107	0.083	0.182	0.242	0.213	0.108	0.282	0.073	0	0.176	0.153	0.182	0.13	0.197	0.261	0.347	0.145	0.088	0.112	0.174	0.764
TCGA.60.2697.01A.11R.2125.07	0	0.076	0.216	0.09	0.152	0.05	0.194	0.22	0.22	0.103	0.405	0.107	0	0.116	0.115	0.121	0.208	0.136	0.198	0.402	0.064	0.102	0.229	0.221	0.78
TCGA.60.2698.01A.01R.0851.07	0	0.074	0.241	0.05	0.093	0.045	0.174	0.227	0.223	0.084	0.3	0.088	0	0.208	0.067	0.246	0.089	0.168	0.373	0.345	0.123	0.133	0.14	0.168	0.816
TCGA.60.2703.01A.11R.2045.07	0.001	0.108	0.158	0.042	0.124	0.085	0.152	0.143	0.147	0.17	0.062	0.062	0.011	0.171	0.079	0.172	0.146	0.221	0.177	0.152	0.198	0.047	0.127	0.109	0.643
TCGA.60.2704.01A.11R.2045.07	0	0.097	0.196	0.057	0.166	0.053	0.233	0.168	0.209	0.114	0.336	0.096	0	0.145	0.093	0.242	0.111	0.209	0.334	0.309	0.092	0.082	0.194	0.165	0.818
TCGA.60.2706.01A.01R.0851.07	0	0.075	0.214	0.084	0.101	0.07	0.212	0.335	0.158	0.086	0.291	0.106	0	0.118	0.06	0.19	0.149	0.208	0.346	0.301	0.139	0.069	0.123	0.194	0.815
TCGA.60.2707.01A.01R.0851.07	0	0.085	0.175	0.028	0.104	0.078	0.193	0.103	0.241	0.159	0.103	0.045	0	0.233	0.113	0.24	0.075	0.252	0.301	0.332	0.196	0.051	0.051	0.119	0.773
TCGA.60.2708.01A.01R.0851.07	0	0.181	0.079	0.033	0.103	0.035	0.119	0.087	0.234	0.23	0.015	0.022	0	0.187	0.161	0.296	0.081	0.227	0.249	0.125	0.158	0.008	0.081	0.134	0.667
TCGA.60.2709.01A.21R.1820.07	0	0.085	0.215	0.057	0.134	0.08	0.199	0.206	0.229	0.078	0.361	0.096	0	0.099	0.121	0.248	0.1	0.18	0.358	0.379	0.076	0.114	0.177	0.232	0.864
TCGA.60.2709.11A.01R.1820.07	0	0.022	0.249	0.036	0.05	0.007	0.099	0.14	0.246	0.181	0.362	0.011	0	0.199	0.175	0.176	0.027	0.192	0.366	0.443	0.235	0.104	0.148	0.119	0.842
TCGA.60.2710.01A.01R.0851.07	0	0.092	0.177	0.035	0.121	0.063	0.211	0.159	0.26	0.104	0.265	0.102	0	0.155	0.121	0.235	0.115	0.173	0.295	0.296	0.128	0.098	0.143	0.194	0.78
TCGA.60.2711.01A.01R.0851.07	0	0.094	0.182	0.079	0.101	0.064	0.156	0.294	0.223	0.104	0.31	0.078	0.033	0.101	0.098	0.179	0.128	0.128	0.144	0.305	0.105	0.119	0.111	0.246	0.665
TCGA.60.2712.01A.01R.0851.07	0	0.041	0.26	0.094	0.186	0.06	0.22	0.26	0.229	0.054	0.359	0.123	0	0.078	0.091	0.197	0.161	0.211	0.273	0.342	0.08	0.102	0.176	0.21	0.815
TCGA.60.2713.01A.01R.0851.07	0	0.053	0.235	0.054	0.12	0.077	0.229	0.238	0.236	0.093	0.284	0.085	0	0.13	0.118	0.276	0.072	0.211	0.349	0.329	0.081	0.088	0.147	0.205	0.825
TCGA.60.2714.01A.01R.0851.07	0	0.04	0.263	0.141	0.112	0.093	0.193	0.296	0.112	0.138	0.24	0.07	0.016	0.105	0.063	0.222	0.098	0.164	0.27	0.347	0.122	0.071	0.174	0.159	0.769
TCGA.60.2715.01A.01R.0851.07	0	0.088	0.173	0.04	0.119	0.07	0.216	0.162	0.224	0.116	0.349	0.084	0	0.184	0.12	0.202	0.1	0.179	0.335	0.37	0.109	0.101	0.199	0.185	0.829
TCGA.60.2716.01A.01R.0851.07	0	0.111	0.094	0	0.046	0.041	0.098	0.083	0.054	0.279	0	0.002	0.006	0.141	0.111	0.222	0.11	0.17	0.138	0	0.207	0.11	0.118	0.176	0.563
TCGA.60.2719.01A.01R.0851.07	0	0.105	0.187	0.03	0.122	0.094	0.243	0.199	0.172	0.098	0.179	0.049	0.032	0.115	0.068	0.249	0.098	0.197	0.316	0.254	0.16	0.103	0.117	0.15	0.761
TCGA.60.2720.01A.01R.0851.07	0	0.061	0.209	0.033	0.07	0.08	0.12	0.164	0.276	0.135	0.315	0.01	0	0.191	0.151	0.221	0.15	0.143	0.22	0.363	0.085	0.158	0.137	0.253	0.777
TCGA.60.2721.01A.01R.0851.07	0	0.093	0.24	0.077	0.144	0.075	0.248	0.27	0.213	0.055	0.319	0.122	0.01	0.073	0.018	0.152	0.12	0.16	0.244	0.337	0.088	0.144	0.145	0.261	0.745
TCGA.60.2722.01A.01R.0851.07	0	0.126	0.125	0.017	0.083	0.103	0.152	0.166	0.286	0.106	0.095	0.037	0.027	0.115	0.136	0.221	0.112	0.166	0.257	0.251	0.209	0.01	0.048	0.17	0.708
TCGA.60.2723.01A.01R.0851.07	0	0.038	0.248	0.086	0.087	0.048	0.259	0.26	0.262	0.085	0.304	0.099	0	0.153	0.091	0.257	0.089	0.163	0.259	0.403	0.121	0.125	0.048	0.182	0.752
TCGA.60.2724.01A.01R.0851.07	0	0.123	0.078	0.06	0.126	0.081	0.173	0.095	0.079	0.194	0	0.031	0	0.236	0.08	0.218	0.086	0.205	0.229	0.12	0.228	0.03	0.099	0.092	0.631
TCGA.60.2725.01A.01R.1201.07	0	0.08	0.214	0.092	0.104	0.043	0.194	0.224	0.206	0.144	0.319	0.08	0	0.181	0.111	0.236	0.116	0.171	0.345	0.326	0.116	0.09	0.138	0.178	0.802
TCGA.60.2726.01A.01R.0851.07	0	0.091	0.226	0.112	0.084	0.028	0.111	0.225	0.282	0.1	0.344	0.073	0.045	0.065	0.082	0.085	0.12	0.177	0.105	0.41	0.088	0.138	0.192	0.237	0.698
TCGA.63.5128.01A.01R.1443.07	0	0.089	0.118	0.017	0.135	0.049	0.129	0.044	0.252	0.225	0.053	0.025	0	0.094	0.145	0.203	0.126	0.231	0.238	0.118	0.192	0.019	0.068	0.132	0.646
TCGA.63.5131.01A.01R.1443.07	0	0.08	0.117	0.034	0.078	0.098	0.14	0.104	0.267	0.157	0.186	0.069	0.013	0.114	0.05	0.213	0.103	0.199	0.244	0.311	0.209	0.079	0.077	0.133	0.736
TCGA.63.6202.01A.11R.1820.07	0	0.046	0.258	0.115	0.096	0.076	0.198	0.287	0.177	0.108	0.305	0.074	0	0.117	0.105	0.254	0.122	0.185	0.336	0.309	0.121	0.132	0.159	0.186	0.826
TCGA.63.7020.01A.11R.1949.07	0	0.083	0.255	0.084	0.099	0.064	0.224	0.296	0.232	0.107	0.231	0.032	0	0.117	0.111	0.217	0.095	0.18	0.246	0.354	0.105	0.11	0.124	0.186	0.744
TCGA.63.7021.01A.11R.1949.07	0	0.047	0.262	0.05	0.136	0.049	0.17	0.216	0.231	0.111	0.264	0.091	0	0.08	0.118	0.185	0.132	0.187	0.282	0.415	0.117	0.091	0.168	0.222	0.844
TCGA.63.7022.01A.11R.1949.07	0	0.09	0.254	0.043	0.158	0.087	0.215	0.164	0.218	0.084	0.31	0.077	0	0.183	0.098	0.232	0.154	0.171	0.306	0.352	0.084	0.067	0.158	0.217	0.827
TCGA.63.7023.01A.11R.1949.07	0	0.13	0.215	0.055	0.099	0.103	0.223	0.228	0.147	0.058	0.261	0.093	0.016	0.034	0.009	0.189	0.084	0.221	0.229	0.195	0.157	0.14	0.126	0.225	0.705
TCGA.63.A5M9.01A.11R.A26W.07	0	0.069	0.163	0.046	0.074	0.064	0.138	0.231	0.241	0.089	0.27	0.124	0	0.177	0.142	0.177	0.122	0.2	0.203	0.308	0.146	0.099	0.175	0.17	0.742
TCGA.63.A5MB.01A.11R.A26W.07	0	0.097	0.191	0.079	0.067	0.069	0.176	0.241	0.253	0.059	0.299	0.033	0.044	0.122	0.103	0.172	0.118	0.152	0.222	0.366	0.164	0.11	0.147	0.167	0.745
TCGA.63.A5MG.01A.12R.A27Q.07	0	0.096	0.165	0.022	0.142	0.057	0.172	0.157	0.229	0.127	0.295	0.096	0	0.136	0.162	0.171	0.198	0.201	0.176	0.327	0.107	0.081	0.163	0.201	0.762
TCGA.63.A5MH.01A.12R.A27Q.07	0	0.144	0.171	0.069	0.046	0.136	0.235	0.108	0.286	0.174	0.123	0.016	0.026	0.029	0.065	0.205	0.04	0.17	0.148	0.274	0.179	0.074	0.142	0.153	0.648
TCGA.63.A5MI.01A.12R.A27Q.07	0	0.125	0.105	0	0.038	0.051	0.156	0.155	0.219	0.209	0.13	0.072	0.018	0.053	0.113	0.141	0.148	0.224	0.104	0.181	0.203	0.098	0.106	0.187	0.639
TCGA.63.A5MJ.01A.11R.A27Q.07	0	0.088	0.197	0.029	0.098	0.092	0.192	0.268	0.267	0.096	0.176	0.041	0.041	0.056	0.11	0.202	0.1	0.162	0.268	0.313	0.172	0.123	0.081	0.179	0.729
TCGA.63.A5ML.01A.31R.A27Q.07	0	0.055	0.21	0.094	0.076	0.086	0.179	0.279	0.287	0.087	0.225	0.036	0.02	0.092	0.108	0.18	0.12	0.179	0.251	0.355	0.13	0.091	0.135	0.162	0.747
TCGA.63.A5MM.01A.11R.A26W.07	0	0.065	0.267	0.097	0.074	0.098	0.238	0.301	0.145	0.108	0.274	0.019	0.025	0.162	0.035	0.246	0.061	0.222	0.311	0.378	0.121	0.118	0.135	0.185	0.82
TCGA.63.A5MN.01A.22R.A27Q.07	0	0.036	0.26	0.095	0.154	0.073	0.218	0.268	0.207	0.114	0.348	0.101	0	0.113	0.097	0.212	0.136	0.196	0.271	0.359	0.046	0.083	0.216	0.226	0.821
TCGA.63.A5MP.01A.11R.A26W.07	0	0.087	0.215	0.055	0.131	0.056	0.206	0.251	0.221	0.072	0.337	0.101	0.01	0.112	0.101	0.197	0.14	0.128	0.22	0.323	0.095	0.088	0.206	0.232	0.761
TCGA.63.A5MR.01A.31R.A27Q.07	0	0.051	0.221	0.061	0.13	0.102	0.129	0.228	0.107	0.171	0.132	0.025	0.009	0.154	0.06	0.215	0.112	0.219	0.219	0.275	0.174	0.058	0.113	0.138	0.724
TCGA.63.A5MS.01A.11R.A26W.07	0	0.124	0.213	0.032	0.12	0.041	0.211	0.17	0.244	0.116	0.363	0.069	0	0.152	0.088	0.192	0.124	0.209	0.266	0.312	0.087	0.132	0.168	0.178	0.758
TCGA.63.A5MT.01A.21R.A26W.07	0	0.109	0.14	0.051	0.122	0.039	0.128	0.159	0.219	0.134	0.147	0.042	0	0.174	0.105	0.237	0.135	0.3	0.302	0.175	0.176	0.092	0.145	0.07	0.761
TCGA.63.A5MU.01A.11R.A26W.07	0	0.095	0.126	0.013	0.081	0.064	0.121	0.179	0.158	0.153	0.123	0	0.027	0.07	0.083	0.158	0.134	0.194	0.117	0.098	0.22	0.108	0.135	0.169	0.605
TCGA.63.A5MV.01A.21R.A26W.07	0	0.139	0.162	0.013	0.135	0.038	0.183	0.113	0.272	0.107	0.32	0.13	0	0.079	0.128	0.216	0.131	0.233	0.26	0.274	0.075	0.078	0.234	0.205	0.804
TCGA.63.A5MW.01A.11R.A26W.07	0.007	0.118	0.188	0.08	0.065	0.129	0.168	0.223	0.318	0.105	0.127	0	0.04	0.074	0.098	0.153	0.083	0.195	0.186	0.319	0.133	0.085	0.142	0.2	0.697
TCGA.63.A5MY.01A.11R.A26W.07	0	0.13	0.047	0.002	0	0.096	0.101	0.13	0.172	0.088	0.041	0	0.001	0.052	0.069	0.078	0.195	0.147	0.075	0.269	0.295	0.129	0.083	0.103	0.615
TCGA.66.2727.01A.01R.0980.07	0	0.09	0.182	0.048	0.107	0.067	0.193	0.246	0.295	0.112	0.251	0.052	0.02	0.114	0.111	0.264	0.129	0.197	0.316	0.376	0.137	0.074	0.104	0.14	0.821
TCGA.66.2734.01A.01R.0980.07	0	0.069	0.137	0.038	0.12	0.094	0.184	0.105	0.176	0.155	0.01	0.028	0	0.258	0.105	0.29	0.107	0.265	0.399	0.222	0.252	0.031	0.085	0.025	0.812
TCGA.66.2737.01A.01R.0980.07	0	0.106	0.164	0.045	0.113	0.082	0.233	0.206	0.256	0.073	0.23	0.072	0	0.155	0.131	0.194	0.11	0.172	0.321	0.342	0.111	0.085	0.124	0.173	0.763
TCGA.66.2742.01A.01R.0980.07	0	0.095	0.142	0.021	0.12	0.085	0.171	0.173	0.211	0.121	0.224	0.096	0	0.145	0.128	0.214	0.148	0.192	0.268	0.242	0.184	0.073	0.084	0.174	0.744
TCGA.66.2744.01A.01R.0980.07	0	0.08	0.265	0.091	0.108	0.065	0.219	0.282	0.219	0.034	0.3	0.085	0	0.164	0.086	0.257	0.145	0.156	0.337	0.36	0.086	0.126	0.138	0.193	0.826
TCGA.66.2753.01A.01R.0980.07	0	0.115	0.106	0.009	0.142	0.073	0.195	0.138	0.202	0.13	0.143	0.078	0	0.146	0.122	0.199	0.193	0.211	0.26	0.146	0.187	0.1	0.114	0.144	0.718
TCGA.66.2754.01A.01R.0980.07	0	0.105	0.15	0.092	0.093	0.158	0.179	0.162	0.184	0.109	0.095	0.058	0.031	0.008	0.076	0.229	0.156	0.215	0.252	0.278	0.186	0.076	0.073	0.122	0.746
TCGA.66.2755.01A.01R.0851.07	0	0.028	0.189	0.098	0.102	0.109	0.26	0.217	0.187	0.177	0.251	0.051	0	0.154	0.071	0.334	0.135	0.179	0.314	0.281	0.188	0.085	0.118	0.161	0.844
TCGA.66.2756.01A.01R.0851.07	0	0.07	0.25	0.084	0.128	0.105	0.14	0.255	0.148	0.123	0.179	0.096	0.05	0.012	0.028	0.221	0.114	0.172	0.249	0.289	0.172	0.102	0.12	0.157	0.738
TCGA.66.2757.01A.01R.0851.07	0	0.104	0.175	0.103	0.097	0.11	0.232	0.232	0.205	0.053	0.202	0.08	0.027	0.105	0.063	0.216	0.12	0.169	0.277	0.263	0.118	0.117	0.106	0.197	0.724
TCGA.66.2758.01A.02R.0851.07	0	0.028	0.256	0.095	0.096	0.082	0.202	0.269	0.245	0.064	0.315	0.092	0.011	0.128	0.085	0.207	0.093	0.15	0.305	0.405	0.128	0.15	0.11	0.215	0.797
TCGA.66.2759.01A.01R.0851.07	0	0.036	0.229	0.093	0.112	0.074	0.206	0.248	0.27	0.069	0.238	0.07	0.011	0.141	0.12	0.235	0.133	0.175	0.309	0.381	0.128	0.08	0.101	0.179	0.81
TCGA.66.2763.01A.01R.0851.07	0	0.113	0.206	0.06	0.105	0.074	0.143	0.244	0.25	0.212	0.127	0.02	0.029	0.124	0.123	0.218	0.164	0.178	0.272	0.335	0.134	0.059	0.099	0.153	0.766
TCGA.66.2765.01A.01R.0851.07	0	0.077	0.159	0.079	0.106	0.09	0.163	0.248	0.196	0.118	0.197	0.073	0.027	0.156	0.135	0.277	0.131	0.184	0.299	0.311	0.123	0.055	0.075	0.185	0.782
TCGA.66.2766.01A.01R.0851.07	0	0.069	0.157	0.04	0.117	0.105	0.169	0.128	0.331	0.058	0.19	0.041	0.042	0.098	0.148	0.211	0.09	0.177	0.248	0.362	0.122	0.125	0.058	0.202	0.726
TCGA.66.2767.01A.01R.0851.07	0	0.061	0.241	0.09	0.13	0.045	0.195	0.245	0.231	0.054	0.332	0.073	0	0.196	0.124	0.244	0.149	0.149	0.325	0.345	0.067	0.102	0.171	0.252	0.84
TCGA.66.2768.01A.01R.0851.07	0	0.024	0.223	0.104	0.083	0.149	0.164	0.272	0.229	0.082	0.076	0.006	0.054	0.169	0.106	0.272	0.109	0.192	0.314	0.306	0.201	0.077	0.05	0.184	0.804
TCGA.66.2769.01A.02R.0851.07	0	0.077	0.175	0.074	0.118	0.072	0.214	0.199	0.229	0.089	0.319	0.095	0	0.138	0.094	0.259	0.129	0.18	0.33	0.334	0.102	0.11	0.111	0.171	0.798
TCGA.66.2770.01A.01R.0851.07	0	0.048	0.222	0.111	0.12	0.066	0.242	0.244	0.236	0.111	0.211	0.028	0.006	0.143	0.113	0.229	0.12	0.198	0.282	0.371	0.118	0.076	0.163	0.145	0.803
TCGA.66.2771.01A.01R.0980.07	0	0.061	0.204	0.092	0.122	0.056	0.181	0.255	0.231	0.089	0.307	0.086	0.03	0.156	0.08	0.25	0.175	0.158	0.374	0.293	0.137	0.104	0.096	0.193	0.827
TCGA.66.2773.01A.01R.1201.07	0	0.014	0.178	0.085	0.096	0.079	0.204	0.253	0.251	0.078	0.301	0.091	0	0.131	0.121	0.213	0.141	0.196	0.313	0.343	0.153	0.096	0.143	0.164	0.823
TCGA.66.2777.01A.01R.1201.07	0	0.075	0.132	0.054	0.118	0.09	0.205	0.102	0.233	0.119	0.218	0.066	0	0.183	0.112	0.296	0.11	0.221	0.368	0.302	0.171	0.061	0.1	0.152	0.85
TCGA.66.2778.01A.02R.0851.07	0	0	0.13	0.042	0.082	0.092	0.128	0.155	0.205	0.15	0.262	0.073	0.019	0.204	0.132	0.288	0.12	0.199	0.367	0.236	0.206	0.077	0.054	0.166	0.808
TCGA.66.2780.01A.01R.0851.07	0	0.081	0.177	0.068	0.142	0.085	0.131	0.167	0.24	0.127	0.115	0.041	0.022	0.172	0.11	0.233	0.134	0.222	0.284	0.271	0.145	0.064	0.077	0.165	0.756
TCGA.66.2781.01A.01R.0851.07	0	0.087	0.159	0.054	0.147	0.078	0.144	0.114	0.28	0.152	0.167	0.073	0.035	0.108	0.087	0.148	0.137	0.13	0.238	0.314	0.194	0.093	0.107	0.164	0.707
TCGA.66.2782.01A.01R.0851.07	0	0.067	0.2	0.057	0.123	0.086	0.22	0.195	0.154	0.075	0.286	0.09	0.007	0.176	0.078	0.182	0.13	0.206	0.339	0.285	0.149	0.086	0.14	0.178	0.794
TCGA.66.2783.01A.01R.1201.07	0	0.08	0.17	0.023	0.148	0.063	0.17	0.15	0.294	0.088	0.278	0.119	0.007	0.133	0.115	0.198	0.172	0.132	0.255	0.351	0.131	0.03	0.11	0.198	0.764
TCGA.66.2785.01A.01R.0851.07	0	0.027	0.289	0.125	0.106	0.095	0.158	0.302	0.19	0.119	0.345	0.104	0.005	0.122	0.004	0.182	0.119	0.166	0.295	0.373	0.116	0.114	0.117	0.244	0.797
TCGA.66.2786.01A.01R.0851.07	0	0.071	0.165	0.043	0.08	0.083	0.184	0.186	0.244	0.134	0.259	0.074	0	0.165	0.117	0.224	0.107	0.172	0.323	0.308	0.121	0.093	0.128	0.18	0.772
TCGA.66.2787.01A.01R.0980.07	0	0.022	0.242	0.094	0.096	0.087	0.169	0.266	0.262	0.037	0.308	0.114	0.024	0.11	0.094	0.217	0.133	0.138	0.293	0.374	0.121	0.12	0.148	0.221	0.812
TCGA.66.2788.01A.01R.0980.07	0	0.08	0.184	0.063	0.136	0.067	0.19	0.247	0.249	0.126	0.245	0.12	0	0.139	0.135	0.206	0.139	0.184	0.263	0.324	0.133	0.059	0.13	0.197	0.778
TCGA.66.2789.01A.01R.0980.07	0	0.097	0.22	0.079	0.126	0.058	0.138	0.141	0.285	0.138	0.163	0.02	0.001	0.149	0.097	0.262	0.149	0.171	0.275	0.362	0.108	0.077	0.14	0.155	0.801
TCGA.66.2790.01A.01R.0980.07	0	0.105	0.205	0.115	0.09	0.094	0.187	0.299	0.241	0.09	0.238	0.081	0.014	0.099	0.095	0.146	0.121	0.145	0.183	0.413	0.114	0.089	0.182	0.157	0.722
TCGA.66.2791.01A.01R.0980.07	0	0.022	0.222	0.111	0.115	0.052	0.233	0.288	0.205	0.06	0.297	0.111	0.004	0.153	0.133	0.176	0.119	0.141	0.276	0.352	0.1	0.119	0.145	0.212	0.751
TCGA.66.2792.01A.01R.0980.07	0	0.119	0.16	0.029	0.115	0.103	0.213	0.177	0.303	0.092	0.114	0.077	0.037	0.129	0.042	0.236	0.116	0.208	0.265	0.268	0.143	0.059	0.126	0.125	0.735
TCGA.66.2793.01A.01R.1201.07	0	0.15	0.079	0.023	0.099	0.082	0.133	0.151	0.171	0.079	0.117	0.015	0.044	0.142	0.083	0.155	0.123	0.187	0.145	0.132	0.189	0.081	0.116	0.155	0.594
TCGA.66.2794.01A.01R.1201.07	0	0.069	0.282	0.119	0.079	0.068	0.235	0.298	0.265	0.018	0.333	0.056	0.008	0.095	0.062	0.228	0.13	0.132	0.267	0.39	0.1	0.139	0.109	0.24	0.788
TCGA.66.2795.01A.02R.0980.07	0	0.054	0.125	0.071	0.099	0.09	0.149	0.199	0.28	0.122	0.28	0.105	0	0.131	0.146	0.246	0.112	0.19	0.349	0.345	0.125	0.075	0.065	0.176	0.794
TCGA.66.2800.01A.01R.1201.07	0	0.13	0.193	0.017	0.114	0.037	0.162	0.145	0.248	0.125	0.266	0.049	0	0.173	0.113	0.3	0.098	0.192	0.38	0.351	0.131	0.073	0.107	0.148	0.843
TCGA.68.7755.01A.11R.2125.07	0	0.155	0.192	0.009	0.104	0.094	0.182	0.197	0.309	0.104	0.135	0.074	0	0.112	0.106	0.152	0.125	0.14	0.181	0.311	0.166	0.067	0.079	0.179	0.658
TCGA.68.7756.01A.11R.2125.07	0	0.11	0.129	0.019	0.123	0.104	0.192	0.142	0.242	0.155	0.197	0.069	0	0.154	0.114	0.207	0.125	0.215	0.236	0.264	0.141	0.036	0.115	0.133	0.709
TCGA.68.7757.01B.11R.2296.07	0	0.102	0.101	0.045	0.129	0.115	0.185	0.098	0.204	0.164	0.179	0.052	0.016	0.219	0.008	0.229	0.105	0.234	0.203	0.243	0.124	0.036	0.124	0.221	0.733
TCGA.68.8250.01A.11R.2296.07	0	0.092	0.199	0.011	0.102	0.064	0.246	0.149	0.185	0.124	0.32	0.067	0	0.184	0.074	0.199	0.103	0.176	0.254	0.328	0.149	0.1	0.151	0.159	0.75
TCGA.68.8251.01A.11R.2296.07	0	0.051	0.227	0.041	0.108	0.121	0.252	0.166	0.252	0.099	0.288	0.088	0	0.13	0.055	0.27	0.133	0.194	0.261	0.226	0.119	0.08	0.152	0.198	0.767
TCGA.68.A59I.01A.11R.A262.07	0	0.109	0.193	0.042	0.137	0.065	0.221	0.191	0.238	0.05	0.375	0.107	0	0.17	0.035	0.148	0.185	0.159	0.168	0.374	0.062	0.101	0.18	0.216	0.736
TCGA.68.A59J.01A.21R.A26W.07	0	0.096	0.249	0.117	0.053	0.072	0.201	0.297	0.234	0.064	0.307	0.013	0.002	0.129	0.142	0.163	0.075	0.189	0.228	0.433	0.131	0.083	0.16	0.158	0.759
TCGA.6A.AB49.01A.12R.A405.07	0	0.125	0.088	0.061	0	0.128	0.128	0.147	0.15	0.102	0.083	0	0.025	0.184	0.094	0.097	0.067	0.174	0.012	0.278	0.181	0.111	0.166	0.144	0.553
TCGA.70.6722.01A.11R.1820.07	0	0.088	0.165	0.073	0.122	0.095	0.265	0.25	0.095	0.116	0.158	0.068	0	0.168	0.099	0.239	0.121	0.24	0.301	0.207	0.133	0.049	0.126	0.118	0.734
TCGA.70.6723.01A.11R.1820.07	0	0.066	0.132	0.08	0	0.099	0.149	0.179	0.259	0.146	0.065	0.043	0.023	0.105	0.089	0.122	0.08	0.091	0.081	0.299	0.216	0.131	0.072	0.156	0.552
TCGA.77.6842.01A.11R.1949.07	0	0.049	0.301	0.111	0.107	0.117	0.192	0.255	0.232	0.054	0.272	0.08	0.007	0.071	0.141	0.203	0.171	0.139	0.261	0.361	0.142	0.115	0.125	0.216	0.798
TCGA.77.6843.01A.11R.1949.07	0	0.08	0.113	0	0.116	0.121	0.189	0.085	0.297	0.11	0.077	0	0.041	0.156	0.085	0.215	0.116	0.207	0.204	0.247	0.203	0.051	0.154	0.13	0.729
TCGA.77.6844.01A.11R.1949.07	0	0.13	0.128	0.016	0.084	0.071	0.163	0.185	0.189	0.112	0.248	0.085	0.032	0.141	0.099	0.16	0.135	0.189	0.162	0.246	0.145	0.112	0.14	0.222	0.691
TCGA.77.6845.01A.11R.1949.07	0	0.117	0.043	0.01	0.075	0.069	0.117	0.092	0.226	0.18	0.122	0.027	0	0.103	0.082	0.174	0.198	0.169	0.182	0.17	0.221	0.071	0.062	0.104	0.632
TCGA.77.7138.01A.41R.2045.07	0	0.106	0.145	0.057	0.095	0.124	0.177	0.216	0.149	0.159	0.013	0	0.034	0.189	0.098	0.235	0.092	0.197	0.205	0.18	0.203	0.036	0.046	0.149	0.646
TCGA.77.7138.11A.01R.2045.07	0	0.003	0.249	0.053	0.065	0	0.078	0.215	0.218	0.18	0.322	0.016	0.008	0.26	0.132	0.189	0.078	0.182	0.311	0.412	0.185	0.137	0.187	0.149	0.835
TCGA.77.7139.01A.11R.2045.07	0	0.111	0.198	0.033	0.109	0.082	0.206	0.214	0.306	0.076	0.151	0.03	0.019	0.111	0.083	0.173	0.125	0.182	0.221	0.241	0.144	0.096	0.151	0.183	0.701
TCGA.77.7140.01A.41R.2045.07	0	0.059	0.216	0.075	0.08	0.102	0.174	0.171	0.22	0.115	0.005	0.03	0.02	0.084	0.06	0.265	0.119	0.185	0.236	0.271	0.172	0.11	0.018	0.165	0.706
TCGA.77.7141.01A.11R.2045.07	0	0.087	0.156	0.051	0.119	0.098	0.174	0.201	0.309	0.09	0.118	0.05	0.019	0.104	0.062	0.195	0.151	0.144	0.225	0.299	0.174	0.076	0.144	0.165	0.739
TCGA.77.7142.01A.11R.2045.07	0	0.124	0.168	0.013	0.085	0.07	0.14	0.171	0.301	0.16	0.177	0.075	0.014	0.122	0.134	0.245	0.106	0.165	0.289	0.308	0.141	0.095	0.134	0.124	0.747
TCGA.77.7142.11A.01R.2045.07	0	0.047	0.248	0.024	0	0	0.036	0.179	0.25	0.186	0.326	0.042	0	0.221	0.168	0.182	0.081	0.201	0.317	0.418	0.177	0.14	0.152	0.153	0.83
TCGA.77.7335.01A.11R.2045.07	0	0.099	0.274	0.101	0.075	0.086	0.164	0.244	0.236	0.066	0.338	0.082	0	0.162	0.104	0.231	0.095	0.164	0.341	0.388	0.082	0.128	0.102	0.274	0.828
TCGA.77.7335.11A.01R.2045.07	0	0.022	0.254	0.039	0.028	0	0.026	0.255	0.233	0.145	0.4	0.082	0.008	0.265	0.168	0.199	0.128	0.125	0.328	0.399	0.156	0.172	0.104	0.192	0.806
TCGA.77.7337.01A.21R.2045.07	0	0.076	0.212	0.054	0.104	0.109	0.191	0.166	0.215	0.151	0.15	0.066	0	0.15	0.123	0.248	0.09	0.212	0.256	0.275	0.17	0.081	0.042	0.213	0.744
TCGA.77.7337.11A.01R.2045.07	0	0.04	0.284	0.039	0.062	0.022	0.142	0.194	0.217	0.15	0.362	0.067	0	0.214	0.154	0.174	0.085	0.14	0.307	0.426	0.144	0.141	0.165	0.202	0.813
TCGA.77.7338.01A.11R.2045.07	0	0.087	0.161	0.024	0.127	0.087	0.22	0.09	0.307	0.129	0.209	0.082	0	0.133	0.109	0.237	0.104	0.211	0.287	0.325	0.147	0.055	0.11	0.217	0.809
TCGA.77.7338.11A.01R.2045.07	0	0.032	0.276	0.056	0	0	0	0.198	0.254	0.145	0.431	0.071	0	0.188	0.164	0.205	0.078	0.107	0.271	0.453	0.14	0.16	0.127	0.215	0.789
TCGA.77.7463.01A.11R.2045.07	0	0.119	0.16	0.055	0.07	0.035	0.16	0.157	0.154	0.224	0.093	0	0.031	0.144	0.15	0.238	0.121	0.205	0.27	0.297	0.185	0.063	0.043	0.116	0.728
TCGA.77.7465.01A.11R.2045.07	0	0.083	0.263	0.134	0.103	0.107	0.216	0.268	0.172	0.1	0.343	0.099	0.016	0.057	0.05	0.265	0.108	0.198	0.223	0.296	0.087	0.091	0.151	0.249	0.779
TCGA.77.8007.01A.11R.2187.07	0	0.035	0.229	0.075	0.103	0.082	0.24	0.278	0.153	0.098	0.24	0.086	0	0.174	0.11	0.303	0.114	0.241	0.35	0.255	0.122	0.09	0.127	0.151	0.821
TCGA.77.8007.11A.01R.2187.07	0	0.054	0.283	0.061	0.081	0.019	0.172	0.206	0.179	0.118	0.375	0.034	0	0.24	0.16	0.298	0.087	0.184	0.409	0.413	0.096	0.107	0.168	0.151	0.892
TCGA.77.8008.01A.21R.2187.07	0	0.091	0.191	0.04	0.131	0.079	0.242	0.131	0.189	0.177	0.218	0.061	0	0.184	0.088	0.211	0.107	0.244	0.331	0.282	0.128	0.031	0.163	0.143	0.795
TCGA.77.8008.11A.01R.2187.07	0	0.045	0.26	0.042	0.091	0.022	0.103	0.148	0.211	0.145	0.335	0.018	0	0.268	0.122	0.17	0.074	0.234	0.352	0.432	0.175	0.104	0.191	0.154	0.881
TCGA.77.8009.01A.11R.2187.07	0	0.11	0.203	0.08	0.083	0.104	0.152	0.249	0.26	0.076	0.051	0.029	0.03	0.151	0.113	0.233	0.094	0.199	0.287	0.342	0.203	0.073	0.076	0.111	0.762
TCGA.77.8128.01A.11R.2247.07	0	0.163	0.106	0.014	0.114	0.044	0.092	0.069	0.298	0.163	0.088	0.004	0	0.11	0.063	0.152	0.09	0.201	0.186	0.216	0.178	0.051	0.108	0.16	0.637
TCGA.77.8130.01A.11R.2247.07	0	0.13	0.124	0.043	0.109	0.028	0.124	0.138	0.197	0.159	0.074	0.014	0	0.189	0.077	0.221	0.088	0.22	0.18	0.188	0.161	0.045	0.087	0.166	0.648
TCGA.77.8131.01A.11R.2247.07	0	0.074	0.292	0.086	0.098	0.042	0.186	0.254	0.176	0.111	0.341	0.065	0	0.138	0.151	0.275	0.124	0.199	0.398	0.341	0.07	0.091	0.139	0.195	0.86
TCGA.77.8133.01A.12R.2247.07	0	0.096	0.163	0.076	0.115	0.062	0.205	0.231	0.233	0.052	0.355	0.107	0	0.105	0.103	0.199	0.28	0.141	0.174	0.31	0.073	0.066	0.198	0.228	0.792
TCGA.77.8136.01A.11R.2247.07	0	0.077	0.281	0.1	0.108	0.079	0.224	0.303	0.183	0.105	0.32	0.088	0	0.082	0.067	0.262	0.089	0.187	0.288	0.359	0.1	0.081	0.171	0.196	0.816
TCGA.77.8138.01A.11R.2247.07	0	0.095	0.162	0.069	0.084	0.09	0.129	0.175	0.251	0.157	0.139	0	0.003	0.236	0.023	0.207	0.125	0.238	0.281	0.297	0.146	0.111	0.091	0.135	0.751
TCGA.77.8139.01A.11R.2247.07	0	0.098	0.146	0.064	0.132	0.088	0.238	0.201	0.175	0.11	0.156	0.071	0.044	0.134	0.013	0.19	0.167	0.155	0.162	0.215	0.127	0.06	0.092	0.211	0.651
TCGA.77.8140.01A.11R.2247.07	0	0.082	0.13	0.032	0.033	0.045	0.058	0.138	0.222	0.156	0.254	0.082	0.035	0.128	0.091	0.121	0.179	0.193	0.123	0.198	0.182	0.109	0.118	0.195	0.647
TCGA.77.8143.01A.11R.2247.07	0	0.09	0.149	0.052	0.07	0.113	0.199	0.215	0.198	0.14	0.149	0.004	0.047	0.115	0.042	0.228	0.133	0.253	0.237	0.205	0.16	0.111	0	0.237	0.717
TCGA.77.8144.01A.11R.2247.07	0	0.083	0.14	0.073	0.03	0.131	0.165	0.196	0.183	0.075	0.005	0.026	0.017	0.123	0.104	0.245	0.073	0.204	0.238	0.268	0.187	0.091	0.014	0.178	0.694
TCGA.77.8145.01A.11R.2247.07	0	0.108	0.181	0.063	0.138	0.038	0.115	0.175	0.273	0.116	0.135	0.076	0.008	0.172	0.031	0.173	0.121	0.207	0.218	0.287	0.132	0.05	0.123	0.158	0.701
TCGA.77.8146.01A.11R.2247.07	0	0.077	0.164	0.056	0.103	0.095	0.127	0.185	0.229	0.138	0.24	0.067	0	0.156	0.094	0.189	0.125	0.204	0.241	0.334	0.138	0.087	0.135	0.156	0.751
TCGA.77.8148.01A.11R.2247.07	0	0.084	0.213	0.021	0.121	0.075	0.105	0.172	0.269	0.105	0.199	0.036	0.021	0.18	0.053	0.196	0.137	0.22	0.237	0.277	0.119	0.097	0.148	0.199	0.757
TCGA.77.8150.01A.11R.2247.07	0	0.071	0.198	0.078	0.104	0.086	0.2	0.247	0.248	0.032	0.326	0.092	0.019	0.145	0.101	0.188	0.119	0.128	0.201	0.363	0.136	0.1	0.177	0.182	0.738
TCGA.77.8153.01A.11R.2403.07	0	0.089	0.155	0.005	0.102	0.096	0.13	0.114	0.292	0.121	0.177	0.049	0.043	0.091	0.066	0.096	0.172	0.142	0.064	0.263	0.159	0.114	0.132	0.21	0.612
TCGA.77.8154.01A.11R.2247.07	0.009	0.163	0.097	0	0.058	0.016	0.043	0.146	0.228	0.149	0.115	0.02	0.01	0.159	0.117	0.159	0.178	0.188	0.093	0.196	0.179	0.083	0.109	0.149	0.618
TCGA.77.8156.01A.11R.2247.07	0	0.046	0.256	0.098	0.125	0.055	0.209	0.269	0.191	0.105	0.328	0.098	0.014	0.094	0.082	0.213	0.104	0.182	0.274	0.396	0.087	0.109	0.187	0.229	0.825
TCGA.77.A5FZ.01A.31R.A27Q.07	0	0.064	0.267	0.097	0.175	0.029	0.206	0.21	0.188	0.08	0.388	0.083	0	0.156	0.089	0.157	0.21	0.15	0.32	0.381	0.065	0.088	0.222	0.214	0.849
TCGA.77.A5G1.01A.11R.A27Q.07	0	0.095	0.151	0.034	0.107	0.067	0.14	0.206	0.252	0.154	0.289	0.084	0	0.193	0.104	0.185	0.139	0.184	0.27	0.228	0.11	0.05	0.143	0.222	0.731
TCGA.77.A5G3.01A.31R.A27Q.07	0	0.07	0.209	0.094	0.063	0.087	0.175	0.252	0.307	0.145	0.18	0.025	0.055	0.049	0.043	0.201	0.088	0.159	0.202	0.387	0.143	0.091	0.156	0.164	0.741
TCGA.77.A5G6.01A.11R.A27Q.07	0	0.15	0.118	0.018	0.116	0.024	0.071	0.175	0.302	0.134	0.192	0.028	0.022	0.137	0.092	0.185	0.17	0.213	0.179	0.104	0.168	0.045	0.143	0.181	0.663
TCGA.77.A5G7.01B.11R.A27Q.07	0	0.104	0.147	0.016	0.063	0.071	0.134	0.156	0.228	0.234	0.149	0.043	0.044	0.143	0.069	0.097	0.163	0.181	0.063	0.194	0.148	0.152	0.142	0.195	0.585
TCGA.77.A5G8.01B.11R.A27Q.07	0	0.084	0.193	0.067	0.095	0.069	0.126	0.205	0.277	0.144	0.228	0.044	0.003	0.103	0.12	0.222	0.103	0.219	0.242	0.333	0.13	0.087	0.117	0.207	0.777
TCGA.77.A5GA.01A.11R.A27Q.07	0	0.094	0.139	0.054	0.105	0.042	0.083	0.154	0.29	0.115	0.276	0.083	0.042	0.103	0.162	0.142	0.165	0.154	0.157	0.33	0.133	0.098	0.176	0.15	0.695
TCGA.77.A5GB.01B.11R.A27Q.07	0	0.095	0.255	0.086	0.125	0.077	0.195	0.259	0.177	0.13	0.208	0.054	0.013	0.102	0.084	0.252	0.125	0.2	0.282	0.3	0.086	0.073	0.116	0.222	0.781
TCGA.77.A5GF.01A.21R.A27Q.07	0	0.101	0.181	0.025	0.113	0.083	0.258	0.178	0.268	0.076	0.206	0.072	0.011	0.123	0.144	0.167	0.135	0.124	0.203	0.332	0.143	0.093	0.114	0.195	0.698
TCGA.77.A5GH.01A.11R.A27Q.07	0	0.078	0.271	0.1	0.109	0.098	0.267	0.244	0.229	0.082	0.278	0.04	0	0.128	0.037	0.201	0.175	0.183	0.293	0.355	0.1	0.098	0.16	0.186	0.816
TCGA.79.5596.01A.31R.1949.07	0	0.101	0.151	0	0.039	0.058	0.098	0.167	0.314	0.184	0.151	0.062	0.027	0.131	0.076	0.151	0.16	0.199	0.15	0.246	0.19	0.033	0.148	0.148	0.687
TCGA.85.6175.01A.11R.1820.07	0	0.117	0.19	0.031	0.114	0.094	0.24	0.165	0.22	0.145	0.277	0.081	0	0.183	0.052	0.275	0.092	0.197	0.305	0.304	0.088	0.079	0.174	0.182	0.798
TCGA.85.6560.01A.11R.1820.07	0	0.096	0.217	0.063	0.112	0.108	0.265	0.259	0.253	0.021	0.206	0.082	0	0.032	0.16	0.214	0.12	0.176	0.362	0.288	0.129	0.113	0.115	0.165	0.775
TCGA.85.6561.01A.11R.1820.07	0	0.05	0.227	0.072	0.148	0.081	0.214	0.263	0.24	0.083	0.305	0.102	0	0.142	0.112	0.183	0.136	0.155	0.276	0.36	0.091	0.098	0.175	0.218	0.787
TCGA.85.6798.01A.11R.1949.07	0	0.168	0.114	0	0.093	0.074	0.096	0.129	0.254	0.145	0.062	0.024	0	0.166	0.098	0.273	0.104	0.22	0.207	0.227	0.182	0.033	0.069	0.114	0.69
TCGA.85.7696.01A.11R.2125.07	0	0.119	0.168	0.022	0.107	0.06	0.186	0.152	0.255	0.142	0.228	0.07	0.01	0.126	0.111	0.172	0.114	0.143	0.219	0.299	0.136	0.097	0.184	0.172	0.71
TCGA.85.7697.01A.11R.2125.07	0	0.127	0.171	0.057	0.126	0.115	0.205	0.239	0.23	0.125	0.302	0.116	0.013	0.063	0.119	0.119	0.177	0.14	0.079	0.314	0.096	0.052	0.186	0.239	0.666
TCGA.85.7698.01A.11R.2125.07	0	0.121	0.203	0.031	0.116	0.061	0.192	0.234	0.265	0.086	0.298	0.115	0	0.133	0.105	0.157	0.127	0.146	0.242	0.353	0.096	0.097	0.183	0.176	0.731
TCGA.85.7699.01A.11R.2125.07	0	0.076	0.247	0.115	0.127	0.107	0.233	0.278	0.221	0.101	0.322	0.101	0	0.088	0.073	0.237	0.118	0.21	0.265	0.317	0.098	0.108	0.143	0.237	0.803
TCGA.85.7710.01A.11R.2125.07	0	0.101	0.2	0.083	0.077	0.09	0.213	0.296	0.17	0.128	0.235	0.056	0.029	0.1	0.099	0.2	0.108	0.192	0.229	0.278	0.148	0.079	0.073	0.162	0.686
TCGA.85.7710.11A.01R.2125.07	0	0.072	0.183	0.066	0.137	0.087	0.24	0.185	0.181	0.065	0.324	0.094	0	0.184	0.137	0.125	0.296	0.08	0.237	0.328	0.075	0.098	0.225	0.24	0.793
TCGA.85.7843.01A.11R.2125.07	0	0.123	0.142	0.026	0.143	0.075	0.207	0.157	0.226	0.085	0.226	0.061	0.008	0.096	0.109	0.205	0.149	0.238	0.285	0.241	0.144	0.067	0.14	0.158	0.77
TCGA.85.7844.01A.11R.2125.07	0	0.098	0.207	0.078	0.125	0.066	0.196	0.157	0.289	0.102	0.19	0.054	0	0.099	0.137	0.202	0.145	0.187	0.244	0.365	0.118	0.072	0.118	0.186	0.774
TCGA.85.7950.01A.11R.2187.07	0	0.097	0.262	0.097	0.104	0.108	0.248	0.263	0.189	0.087	0.296	0.084	0.009	0.024	0.108	0.199	0.111	0.119	0.182	0.303	0.101	0.132	0.201	0.214	0.707
TCGA.85.8048.01A.11R.2247.07	0	0.061	0.23	0.101	0.131	0.053	0.216	0.258	0.187	0.102	0.393	0.091	0	0.139	0.075	0.188	0.149	0.158	0.258	0.357	0.075	0.107	0.194	0.214	0.786
TCGA.85.8049.01A.11R.2247.07	0	0.045	0.254	0.076	0.147	0.063	0.218	0.201	0.189	0.104	0.383	0.097	0	0.159	0.111	0.156	0.144	0.2	0.27	0.405	0.092	0.07	0.206	0.185	0.819
TCGA.85.8052.01A.11R.2247.07	0	0.089	0.164	0.011	0.111	0.065	0.164	0.17	0.26	0.112	0.196	0.078	0	0.157	0.089	0.225	0.152	0.171	0.26	0.271	0.154	0.05	0.141	0.163	0.759
TCGA.85.8070.01A.11R.2247.07	0	0.136	0.11	0	0.051	0.088	0.114	0.096	0.246	0.062	0.204	0.02	0.067	0.084	0.052	0.117	0.188	0.136	0.106	0.234	0.207	0.138	0.089	0.169	0.615
TCGA.85.8071.01A.11R.2247.07	0	0.134	0.222	0.061	0.068	0.054	0.21	0.282	0.151	0.15	0.23	0	0.045	0.064	0.096	0.137	0.108	0.125	0	0.336	0.145	0.107	0.068	0.281	0.591
TCGA.85.8072.01A.31R.2247.07	0	0.044	0.177	0.084	0.094	0.056	0.176	0.234	0.271	0.102	0.275	0.087	0.003	0.116	0.127	0.201	0.149	0.151	0.247	0.375	0.143	0.076	0.126	0.163	0.768
TCGA.85.8276.01A.11R.2296.07	0	0.123	0.254	0.096	0.138	0.037	0.179	0.282	0.221	0.051	0.304	0.095	0	0.129	0.092	0.191	0.123	0.178	0.261	0.367	0.092	0.091	0.17	0.206	0.784
TCGA.85.8277.01A.11R.2296.07	0	0.05	0.206	0.075	0.097	0.072	0.203	0.2	0.276	0.11	0.211	0.076	0	0.088	0.097	0.151	0.113	0.182	0.183	0.376	0.152	0.137	0.084	0.208	0.716
TCGA.85.8287.01A.11R.2296.07	0	0.094	0.214	0.055	0.162	0.084	0.221	0.194	0.23	0.063	0.378	0.126	0	0.12	0.045	0.155	0.153	0.178	0.217	0.312	0.071	0.127	0.213	0.223	0.752
TCGA.85.8288.01A.11R.2296.07	0	0.139	0.22	0.053	0.105	0.126	0.237	0.181	0.232	0.091	0.25	0.073	0	0.137	0.076	0.162	0.104	0.195	0.172	0.315	0.115	0.065	0.144	0.151	0.67
TCGA.85.8350.01A.11R.2296.07	0	0.116	0.212	0.046	0.096	0.04	0.157	0.164	0.261	0.107	0.309	0.061	0	0.171	0.108	0.216	0.135	0.173	0.196	0.332	0.104	0.089	0.187	0.175	0.75
TCGA.85.8351.01A.11R.2296.07	0	0.101	0.189	0.059	0.099	0.114	0.131	0.192	0.138	0.148	0.115	0.014	0.017	0.139	0.106	0.234	0.085	0.235	0.285	0.282	0.16	0.065	0.094	0.082	0.72
TCGA.85.8352.01A.31R.2326.07	0	0.136	0.122	0.063	0	0.095	0.119	0.174	0.305	0.074	0.218	0	0.049	0	0.023	0.138	0.124	0.069	0.17	0.231	0.162	0.145	0.087	0.29	0.628
TCGA.85.8353.01A.21R.2296.07	0	0.08	0.231	0.053	0.138	0.076	0.189	0.225	0.193	0.094	0.316	0.118	0	0.126	0.128	0.188	0.138	0.173	0.227	0.329	0.097	0.082	0.17	0.197	0.751
TCGA.85.8354.01A.31R.2326.07	0	0.032	0.167	0.041	0.109	0.11	0.155	0.193	0.167	0.095	0.222	0.012	0.063	0.138	0.096	0.199	0.095	0.18	0.19	0.374	0.191	0.065	0.101	0.177	0.745
TCGA.85.8355.01A.11R.2296.07	0	0.069	0.214	0.07	0.166	0.065	0.239	0.236	0.193	0.034	0.368	0.106	0	0.1	0.123	0.187	0.196	0.118	0.283	0.343	0.079	0.106	0.206	0.232	0.812
TCGA.85.8479.01A.11R.2326.07	0	0.168	0.064	0.006	0.067	0.057	0.056	0.088	0.206	0.152	0.114	0.003	0.02	0.094	0.128	0.205	0.118	0.172	0.088	0.126	0.225	0.098	0.093	0.232	0.622
TCGA.85.8481.01A.11R.2326.07	0	0.096	0.195	0.06	0.122	0.091	0.18	0.194	0.324	0.107	0.166	0.014	0.007	0.183	0.03	0.239	0.138	0.268	0.288	0.228	0.174	0.064	0.094	0.134	0.771
TCGA.85.8580.01A.31R.2403.07	0	0.084	0.168	0.051	0.132	0.047	0.099	0.174	0.242	0.128	0.342	0.11	0.013	0.091	0.087	0.143	0.215	0.163	0.129	0.283	0.122	0.033	0.202	0.239	0.738
TCGA.85.8582.01A.21R.2403.07	0	0.128	0.152	0.049	0.123	0.074	0.22	0.139	0.235	0.128	0.256	0.088	0	0.093	0.082	0.166	0.183	0.194	0.215	0.332	0.089	0.072	0.202	0.146	0.754
TCGA.85.8584.01A.11R.2403.07	0	0.035	0.263	0.106	0.085	0.064	0.183	0.289	0.212	0.146	0.377	0.095	0.012	0.098	0.106	0.089	0.155	0.157	0.145	0.414	0.07	0.1	0.21	0.236	0.73
TCGA.85.8664.01A.11R.2403.07	0	0.109	0.112	0.018	0.001	0.075	0.127	0.185	0.264	0.194	0.119	0	0.035	0.166	0.066	0.101	0.111	0.225	0.143	0.205	0.197	0.104	0.129	0.195	0.645
TCGA.85.8666.01A.11R.2403.07	0	0.088	0.209	0.064	0.109	0.08	0.2	0.172	0.141	0.158	0.211	0.051	0	0.119	0.126	0.242	0.096	0.258	0.328	0.269	0.148	0.071	0.137	0.127	0.793
TCGA.85.A4CL.01A.41R.A26W.07	0	0.016	0.318	0.111	0.07	0.06	0.153	0.276	0.27	0.065	0.356	0.071	0.011	0.079	0.073	0.18	0.091	0.161	0.244	0.411	0.102	0.148	0.189	0.213	0.785
TCGA.85.A4CN.01A.11R.A24H.07	0	0.086	0.199	0.043	0.105	0.088	0.182	0.229	0.267	0.1	0.242	0.06	0.021	0.101	0.122	0.132	0.095	0.163	0.199	0.333	0.132	0.092	0.137	0.224	0.699
TCGA.85.A4JB.01A.51R.A262.07	0	0.141	0.15	0.077	0.102	0.06	0.16	0.228	0.286	0.128	0.177	0.034	0.09	0.125	0.013	0.065	0.123	0.163	0.095	0.341	0.159	0.04	0.157	0.153	0.621
TCGA.85.A4JC.01A.11R.A24Z.07	0	0.087	0.188	0.033	0.097	0.024	0.13	0.143	0.247	0.136	0.272	0.088	0	0.166	0.119	0.177	0.08	0.249	0.221	0.364	0.158	0.077	0.202	0.16	0.795
TCGA.85.A4PA.01A.11R.A24Z.07	0	0.096	0.207	0.111	0.154	0.066	0.256	0.245	0.18	0	0.431	0.102	0	0.052	0.069	0.055	0.427	0	0.067	0.359	0	0.087	0.288	0.275	0.726
TCGA.85.A4QQ.01A.41R.A262.07	0	0.095	0.13	0.07	0	0.109	0.184	0.248	0.103	0.126	0.113	0	0.074	0.071	0.101	0.219	0.095	0.203	0.149	0.288	0.156	0.077	0.101	0.151	0.673
TCGA.85.A4QR.01A.11R.A24Z.07	0	0.158	0	0	0.027	0.02	0.049	0.097	0.086	0.139	0.213	0	0	0.125	0	0.123	0.177	0.176	0.005	0.177	0.234	0.057	0.134	0.16	0.586
TCGA.85.A50M.01A.21R.A262.07	0	0.054	0.17	0.018	0.121	0.079	0.184	0.157	0.189	0.204	0.227	0.096	0	0.189	0.046	0.158	0.121	0.24	0.148	0.262	0.201	0.066	0.139	0.1	0.676
TCGA.85.A50Z.01A.21R.A262.07	0	0.093	0.21	0.109	0.048	0.045	0.116	0.259	0.138	0.165	0.176	0.005	0.061	0.09	0.169	0.067	0.085	0.244	0.131	0.363	0.252	0.125	0.059	0.167	0.675
TCGA.85.A510.01A.11R.A26W.07	0	0.097	0.231	0.101	0.092	0.105	0.165	0.301	0.157	0.033	0.385	0.114	0.026	0.022	0.037	0.192	0.14	0.166	0.256	0.289	0.089	0.124	0.178	0.226	0.759
TCGA.85.A511.01A.21R.A262.07	0	0.077	0.202	0.096	0.122	0.079	0.175	0.245	0.214	0.098	0.3	0.08	0.011	0.176	0.089	0.173	0.12	0.219	0.232	0.353	0.114	0.081	0.169	0.182	0.772
TCGA.85.A512.01A.11R.A26W.07	0	0.115	0.137	0.019	0.068	0.08	0.168	0.176	0.202	0.121	0.226	0	0.016	0.129	0.123	0.237	0.085	0.243	0.235	0.244	0.159	0.09	0.15	0.169	0.751
TCGA.85.A513.01A.12R.A26W.07	0	0.059	0.261	0.115	0.14	0.033	0.169	0.247	0.205	0.102	0.393	0.023	0	0.18	0.101	0.171	0.167	0.17	0.253	0.352	0.055	0.108	0.219	0.237	0.802
TCGA.85.A53L.01A.21R.A26W.07	0	0.072	0.165	0.032	0.089	0.11	0.126	0.157	0.312	0.176	0.176	0.055	0.014	0.069	0.104	0.149	0.175	0.161	0.115	0.284	0.14	0.103	0.127	0.19	0.662
TCGA.85.A5B5.01A.21R.A26W.07	0.004	0.151	0.097	0.009	0.063	0.09	0.12	0.163	0.317	0.076	0.177	0.068	0.054	0.098	0.098	0.158	0.18	0.149	0.16	0.269	0.138	0.052	0.198	0.164	0.699
TCGA.90.6837.01A.11R.1949.07	0	0.062	0.224	0.066	0.114	0.079	0.2	0.211	0.216	0.086	0.268	0.049	0	0.168	0.099	0.263	0.14	0.253	0.364	0.337	0.1	0.086	0.112	0.182	0.865
TCGA.90.6837.11A.01R.1949.07	0	0.039	0.234	0.014	0.031	0.004	0.082	0.132	0.234	0.156	0.341	0.038	0	0.258	0.144	0.209	0.089	0.217	0.343	0.421	0.182	0.116	0.15	0.123	0.856
TCGA.90.7766.01A.21R.2125.07	0	0.122	0.2	0.087	0.15	0.082	0.214	0.265	0.279	0.044	0.283	0.102	0.024	0.085	0.024	0.168	0.201	0.171	0.209	0.3	0.119	0.078	0.144	0.21	0.751
TCGA.90.7767.01A.11R.2125.07	0	0.097	0.22	0.096	0.096	0.108	0.252	0.255	0.272	0.149	0.286	0.093	0	0.052	0.044	0.239	0.144	0.166	0.209	0.327	0.11	0.062	0.15	0.227	0.776
TCGA.90.7767.11A.01R.2125.07	0	0.067	0.224	0.015	0.059	0	0.092	0.146	0.248	0.16	0.312	0.001	0	0.265	0.148	0.195	0.082	0.224	0.344	0.392	0.179	0.117	0.183	0.124	0.85
TCGA.90.7769.01A.11R.2125.07	0	0.106	0.128	0.022	0.089	0.065	0.128	0.134	0.257	0.134	0.123	0.031	0	0.103	0.124	0.198	0.094	0.185	0.206	0.223	0.214	0.07	0.034	0.163	0.651
TCGA.90.7964.01A.21R.2187.07	0	0.081	0.183	0.023	0.089	0.06	0.082	0.136	0.25	0.177	0.194	0.036	0	0.189	0.131	0.204	0.14	0.216	0.318	0.363	0.179	0.053	0.118	0.095	0.807
TCGA.90.A4ED.01A.31R.A24Z.07	0	0.077	0.228	0.06	0.134	0.014	0.07	0.139	0.225	0.092	0.302	0.05	0	0.11	0.072	0.129	0.192	0.214	0.162	0.2	0.094	0.157	0.21	0.26	0.722
TCGA.90.A4EE.01A.11R.A24Z.07	0	0.086	0.299	0.116	0.115	0.101	0.239	0.27	0.181	0.054	0.347	0.075	0	0.094	0.046	0.242	0.135	0.158	0.29	0.359	0.082	0.114	0.172	0.259	0.838
TCGA.90.A59Q.01A.11R.A26W.07	0	0.043	0.266	0.134	0.099	0.059	0.207	0.279	0.203	0.12	0.35	0.099	0.01	0.087	0.033	0.132	0.118	0.2	0.224	0.347	0.163	0.085	0.214	0.239	0.808
TCGA.92.7340.01A.21R.2045.07	0	0.088	0.201	0.044	0.109	0.101	0.209	0.217	0.237	0.109	0.333	0.126	0	0.106	0.093	0.193	0.108	0.156	0.22	0.347	0.096	0.129	0.133	0.23	0.732
TCGA.92.7340.11A.01R.2045.07	0	0.015	0.23	0.021	0.037	0.007	0.127	0.135	0.236	0.175	0.329	0.024	0	0.256	0.145	0.127	0.081	0.188	0.325	0.421	0.244	0.119	0.172	0.105	0.822
TCGA.92.7341.01A.31R.2045.07	0	0.136	0.189	0.008	0.122	0.096	0.184	0.157	0.299	0.107	0.166	0.086	0	0.083	0.105	0.24	0.11	0.2	0.294	0.276	0.151	0.049	0.088	0.155	0.748
TCGA.92.8063.01A.11R.2247.07	0	0.057	0.176	0.066	0.093	0.093	0.14	0.216	0.225	0.135	0.237	0.039	0.001	0.171	0.106	0.212	0.126	0.212	0.278	0.334	0.152	0.045	0.124	0.164	0.792
TCGA.92.8064.01A.11R.2247.07	0	0.053	0.297	0.127	0.119	0.077	0.255	0.281	0.203	0.028	0.373	0.117	0	0.069	0.06	0.227	0.115	0.161	0.266	0.374	0.1	0.116	0.139	0.222	0.792
TCGA.92.8065.01A.11R.2247.07	0	0.067	0.219	0.081	0.161	0.092	0.216	0.271	0.128	0.027	0.252	0.067	0.027	0.119	0.039	0.231	0.182	0.18	0.322	0.237	0.128	0.097	0.154	0.236	0.824
TCGA.94.7033.01A.11R.1949.07	0	0.107	0.152	0.059	0.025	0.06	0.133	0.271	0.175	0.142	0.162	0.04	0.069	0.125	0.091	0.141	0.144	0.18	0.123	0.294	0.134	0.105	0.151	0.148	0.649
TCGA.94.7557.01A.11R.2125.07	0	0.063	0.174	0.023	0.115	0.075	0.202	0.085	0.288	0.119	0.05	0.025	0.001	0.248	0.116	0.234	0.156	0.23	0.3	0.291	0.19	0.059	0.099	0.113	0.797
TCGA.94.7943.01A.11R.2187.07	0	0.104	0.148	0.02	0.084	0.068	0.186	0.156	0.269	0.112	0.326	0.091	0	0.177	0.088	0.182	0.144	0.193	0.228	0.313	0.181	0.039	0.146	0.155	0.761
TCGA.94.8035.01A.11R.2247.07	0	0.103	0.122	0.07	0.112	0.03	0.119	0.116	0.2	0.175	0.072	0.041	0	0.129	0.089	0.223	0.106	0.202	0.233	0.149	0.209	0.064	0.1	0.135	0.671
TCGA.94.8490.01A.11R.2326.07	0	0.082	0.134	0.09	0	0.082	0.116	0.206	0.293	0.197	0.135	0	0.049	0.112	0.053	0.069	0.141	0.105	0.047	0.3	0.217	0.09	0.068	0.198	0.566
TCGA.94.8491.01A.11R.2326.07	0	0.063	0.202	0.033	0.116	0.077	0.148	0.145	0.316	0.059	0.335	0.117	0.03	0.092	0.075	0.161	0.199	0.138	0.204	0.377	0.098	0.102	0.178	0.245	0.79
TCGA.94.A4VJ.01A.11R.A24Z.07	0	0.11	0.137	0.065	0.08	0.081	0.167	0.204	0.281	0.146	0.147	0	0.049	0.172	0.112	0.213	0.125	0.227	0.172	0.28	0.159	0.041	0.117	0.131	0.703
TCGA.94.A5I4.01A.11R.A26W.07	0	0.088	0.063	0	0.113	0.081	0.195	0.072	0.218	0.208	0.137	0.004	0.022	0.102	0.098	0.196	0.14	0.245	0.255	0.187	0.191	0.059	0.149	0.091	0.718
TCGA.94.A5I6.01A.21R.A27Q.07	0	0.108	0.129	0.03	0.1	0.08	0.154	0.114	0.263	0.119	0.15	0.05	0.017	0.144	0.103	0.234	0.114	0.211	0.248	0.266	0.167	0.044	0.15	0.162	0.766
TCGA.96.7544.01A.11R.2045.07	0	0.134	0.195	0.023	0.14	0.079	0.245	0.199	0.272	0.08	0.218	0.098	0	0.081	0.08	0.226	0.146	0.22	0.317	0.295	0.122	0.062	0.102	0.185	0.796
TCGA.96.7545.01A.21R.2045.07	0	0.103	0.196	0.002	0.1	0.057	0.189	0.173	0.271	0.104	0.324	0.113	0	0.177	0.135	0.216	0.129	0.158	0.282	0.385	0.134	0.101	0.129	0.162	0.788
TCGA.96.8169.01A.11R.2296.07	0	0.136	0.155	0.059	0.082	0.089	0.17	0.204	0.304	0.175	0.17	0.047	0	0.163	0.033	0.176	0.129	0.203	0.249	0.331	0.137	0.059	0.151	0.142	0.749
TCGA.96.8170.01A.11R.2296.07	0	0.1	0.143	0	0.101	0.046	0.175	0.114	0.255	0.163	0.259	0.076	0	0.162	0.1	0.178	0.144	0.211	0.281	0.299	0.143	0.07	0.185	0.151	0.786
TCGA.96.A4JK.01A.11R.A24Z.07	0	0.061	0.238	0.101	0.112	0.074	0.192	0.305	0.261	0.049	0.226	0.032	0.045	0.098	0.09	0.178	0.123	0.175	0.218	0.355	0.124	0.101	0.165	0.194	0.756
TCGA.96.A4JL.01A.11R.A24Z.07	0	0.098	0.303	0.098	0.127	0.076	0.227	0.258	0.179	0.057	0.333	0.111	0	0.114	0.008	0.156	0.173	0.103	0.22	0.357	0.106	0.124	0.218	0.237	0.775
TCGA.98.7454.01A.11R.2045.07	0	0.05	0.25	0.098	0.147	0.086	0.216	0.235	0.187	0.136	0.329	0.099	0	0.177	0.095	0.206	0.159	0.144	0.332	0.369	0.109	0.064	0.172	0.158	0.814
TCGA.98.8020.01A.11R.2247.07	0	0.112	0.194	0.078	0.088	0.092	0.239	0.217	0.112	0.081	0.222	0.061	0	0.26	0.08	0.233	0.079	0.16	0.273	0.25	0.137	0.054	0.124	0.22	0.729
TCGA.98.8021.01A.11R.2247.07	0	0.099	0.186	0.035	0.124	0.044	0.149	0.129	0.285	0.135	0.182	0.062	0.012	0.172	0.104	0.179	0.18	0.184	0.174	0.292	0.134	0.078	0.148	0.185	0.728
TCGA.98.8022.01A.11R.2247.07	0	0.07	0.211	0.06	0.082	0.03	0.136	0.205	0.253	0.146	0.332	0.053	0.014	0.181	0.082	0.157	0.161	0.16	0.213	0.382	0.129	0.102	0.172	0.166	0.76
TCGA.98.8023.01A.11R.2247.07	0	0.039	0.249	0.081	0.125	0.084	0.218	0.303	0.202	0.071	0.308	0.098	0	0.099	0.097	0.231	0.137	0.22	0.269	0.332	0.108	0.104	0.153	0.22	0.824
TCGA.98.A538.01A.11R.A262.07	0	0.087	0.198	0.074	0.131	0.064	0.17	0.296	0.182	0.069	0.216	0.065	0.069	0.113	0.049	0.208	0.142	0.213	0.276	0.253	0.164	0.066	0.056	0.185	0.74
TCGA.98.A539.01A.31R.A262.07	0	0.062	0.118	0.049	0.125	0.024	0.048	0.147	0.217	0.122	0.175	0.051	0	0.194	0.122	0.23	0.124	0.236	0.306	0.221	0.172	0.05	0.121	0.168	0.78
TCGA.98.A53A.01A.11R.A262.07	0	0.108	0.186	0.106	0.09	0.072	0.156	0.255	0.266	0.066	0.286	0.028	0.031	0.128	0.105	0.13	0.126	0.166	0.119	0.359	0.135	0.064	0.141	0.198	0.678
TCGA.98.A53B.01A.11R.A262.07	0	0.101	0.25	0.088	0.076	0.061	0.185	0.266	0.233	0.104	0.268	0.032	0.011	0.146	0.024	0.227	0.106	0.191	0.251	0.337	0.114	0.091	0.178	0.154	0.77
TCGA.98.A53C.01A.11R.A262.07	0	0.076	0.248	0.064	0.158	0.022	0.194	0.196	0.195	0.108	0.413	0.083	0	0.124	0.12	0.152	0.176	0.158	0.248	0.377	0.065	0.141	0.24	0.195	0.796
TCGA.98.A53D.01A.32R.A262.07	0	0.092	0.202	0.064	0.113	0.054	0.175	0.132	0.228	0.17	0.375	0.055	0	0.115	0.16	0.18	0.133	0.198	0.318	0.396	0.097	0.071	0.235	0.143	0.839
TCGA.98.A53H.01A.12R.A262.07	0	0.09	0.193	0.071	0.116	0.014	0.193	0.204	0.21	0.127	0.372	0.098	0	0.176	0.128	0.143	0.17	0.167	0.2	0.394	0.064	0.093	0.272	0.195	0.793
TCGA.98.A53I.01A.31R.A262.07	0	0.072	0.21	0.084	0.119	0.056	0.184	0.288	0.249	0.042	0.343	0.103	0.005	0.071	0.137	0.149	0.229	0.109	0.21	0.393	0.099	0.092	0.199	0.204	0.787
TCGA.98.A53J.01A.11R.A26W.07	0	0.075	0.138	0.011	0.066	0.067	0.136	0.141	0.262	0.116	0.202	0.024	0.022	0.163	0.134	0.193	0.108	0.216	0.205	0.33	0.196	0.052	0.136	0.179	0.772
TCGA.J1.A4AH.01A.31R.A24H.07	0	0.072	0.178	0.018	0.141	0.081	0.165	0.14	0.296	0.093	0.182	0.036	0.034	0.127	0.047	0.185	0.187	0.162	0.154	0.26	0.162	0.101	0.154	0.187	0.717
TCGA.L3.A4E7.01A.11R.A24Z.07	0	0.112	0.182	0.027	0.1	0.058	0.17	0.2	0.216	0.152	0.242	0.037	0.013	0.164	0.113	0.181	0.136	0.207	0.233	0.3	0.162	0.102	0.141	0.152	0.746
TCGA.L3.A524.01A.11R.A262.07	0	0.099	0.181	0.027	0.107	0.11	0.202	0.263	0.282	0.084	0.192	0.009	0.022	0.048	0.097	0.197	0.121	0.177	0.243	0.264	0.176	0.07	0.145	0.133	0.719
TCGA.LA.A446.01A.21R.A24Z.07	0	0.098	0.143	0.075	0.101	0.027	0.094	0.137	0.304	0.081	0.225	0.049	0.037	0.152	0.127	0.172	0.16	0.188	0.195	0.306	0.168	0.078	0.118	0.181	0.734
TCGA.LA.A7SW.01A.11R.A405.07	0	0.074	0.153	0.082	0.119	0.192	0.112	0.183	0.061	0.061	0	0.027	0	0.108	0.108	0.202	0.068	0.203	0.257	0.294	0.221	0.045	0.096	0.166	0.745
TCGA.MF.A522.01A.11R.A262.07	0	0.044	0.172	0.084	0	0.142	0.121	0.29	0.157	0.089	0.222	0.044	0.059	0.074	0.076	0.152	0.108	0.208	0.17	0.243	0.216	0.122	0.013	0.213	0.654
TCGA.NC.A5HD.01A.11R.A26W.07	0	0.112	0.138	0.04	0.122	0.08	0.137	0.155	0.301	0.096	0.13	0	0.054	0.044	0.038	0.127	0.182	0.189	0.083	0.217	0.186	0.115	0.147	0.145	0.631
TCGA.NC.A5HE.01A.11R.A26W.07	0	0.067	0.283	0.126	0.075	0.05	0.201	0.278	0.205	0.057	0.357	0.079	0	0.077	0.176	0.248	0.115	0.169	0.296	0.368	0.083	0.126	0.167	0.26	0.843
TCGA.NC.A5HF.01A.11R.A26W.07	0	0.094	0.089	0.021	0.064	0.075	0.128	0.102	0.284	0.17	0.061	0	0.034	0.111	0.125	0.161	0.11	0.181	0.078	0.325	0.192	0.057	0.129	0.137	0.648
TCGA.NC.A5HG.01A.11R.A26W.07	0	0.125	0.095	0.032	0.028	0.054	0.087	0.152	0.092	0.111	0.025	0	0.024	0.052	0.109	0.17	0.103	0.19	0.16	0.121	0.241	0.116	0.084	0.174	0.615
TCGA.NC.A5HH.01A.11R.A26W.07	0	0.086	0.223	0.081	0.081	0.09	0.061	0.306	0.278	0.086	0.293	0.004	0.065	0.1	0.053	0.212	0.069	0.217	0.15	0.322	0.132	0.089	0.173	0.191	0.724
TCGA.NC.A5HI.01A.11R.A26W.07	0	0.067	0.131	0.03	0.087	0.071	0.139	0.243	0.256	0.082	0.244	0.055	0.084	0.089	0.123	0.182	0.146	0.198	0.136	0.284	0.156	0.126	0.129	0.212	0.712
TCGA.NC.A5HJ.01A.11R.A26W.07	0	0.055	0.255	0.079	0.069	0.023	0.183	0.275	0.251	0.091	0.339	0.063	0	0.148	0.122	0.22	0.134	0.173	0.293	0.352	0.094	0.134	0.185	0.207	0.819
TCGA.NC.A5HK.01A.11R.A26W.07	0	0.056	0.146	0.139	0	0.113	0.058	0.298	0.328	0.117	0.187	0	0.064	0.012	0.107	0.179	0.143	0.148	0.133	0.363	0.176	0.109	0.08	0.177	0.691
TCGA.NC.A5HL.01A.11R.A26W.07	0	0.048	0.239	0.079	0.078	0.066	0.249	0.257	0.282	0.024	0.34	0.077	0	0.116	0.073	0.213	0.077	0.157	0.215	0.395	0.115	0.147	0.207	0.2	0.78
TCGA.NC.A5HM.01A.12R.A26W.07	0	0.086	0.207	0.068	0.058	0.081	0.149	0.303	0.19	0.107	0.198	0.033	0.076	0.089	0.041	0.158	0.107	0.15	0.12	0.322	0.143	0.141	0.157	0.167	0.654
TCGA.NC.A5HN.01A.11R.A26W.07	0	0.083	0.184	0.057	0.086	0.034	0.141	0.2	0.223	0.136	0.141	0.081	0.035	0.124	0.093	0.149	0.104	0.057	0.076	0.273	0.181	0.096	0.068	0.219	0.556
TCGA.NC.A5HO.01A.11R.A26W.07	0	0.097	0.22	0.089	0.048	0.085	0.144	0.243	0.247	0.104	0.24	0	0.045	0.038	0.125	0.173	0.08	0.213	0.189	0.324	0.175	0.141	0.144	0.179	0.73
TCGA.NC.A5HP.01A.11R.A26W.07	0	0.14	0.094	0.029	0.102	0.09	0.125	0.139	0.252	0.132	0.15	0.019	0.019	0.133	0.08	0.223	0.09	0.236	0.243	0.27	0.155	0.015	0.127	0.144	0.735
TCGA.NC.A5HQ.01A.11R.A26W.07	0	0.115	0.224	0.011	0.082	0.125	0.192	0.229	0.277	0.064	0.382	0.054	0.012	0.101	0.077	0.139	0.185	0.147	0.169	0.347	0.101	0.105	0.184	0.273	0.763
TCGA.NC.A5HR.01A.21R.A26W.07	0	0.077	0.139	0.067	0.04	0.094	0.129	0.296	0.244	0.074	0.218	0	0.053	0.1	0.138	0.125	0.095	0.169	0.185	0.328	0.174	0.127	0.141	0.192	0.696
TCGA.NC.A5HT.01A.11R.A26W.07	0	0.16	0	0	0.026	0.042	0.11	0.077	0.037	0.172	0.017	0	0.002	0.208	0.134	0.067	0.163	0.134	0.02	0.145	0.203	0.101	0.113	0.152	0.492
TCGA.NK.A5CR.01A.11R.A26W.07	0	0.111	0.098	0.005	0.13	0.035	0.077	0.126	0.277	0.2	0.132	0	0.009	0.109	0.067	0.172	0.168	0.242	0.198	0.153	0.173	0.081	0.055	0.141	0.643
TCGA.NK.A5CT.01A.31R.A26W.07	0	0.041	0.187	0.07	0.048	0.134	0.094	0.217	0.253	0.237	0.199	0	0.052	0.081	0.126	0.089	0.076	0.159	0.163	0.427	0.185	0.059	0.127	0.217	0.713
TCGA.NK.A5CX.01A.11R.A26W.07	0	0.088	0.23	0.088	0.082	0.047	0.139	0.29	0.264	0.088	0.289	0.067	0.042	0.143	0.081	0.203	0.107	0.192	0.246	0.366	0.098	0.077	0.17	0.173	0.768
TCGA.NK.A5D1.01A.11R.A26W.07	0	0.149	0.158	0.106	0.07	0.074	0.08	0.219	0.294	0.141	0.141	0	0.027	0.062	0.117	0.08	0.13	0.216	0.171	0.26	0.154	0.107	0.112	0.19	0.648
TCGA.NK.A7XE.01A.12R.A405.07	0	0.101	0.099	0.141	0	0.085	0.117	0.263	0.198	0.175	0.167	0	0.016	0.104	0.121	0.16	0.104	0.223	0.202	0.356	0.156	0.074	0.072	0.153	0.705
TCGA.O2.A52N.01A.11R.A26W.07	0	0.056	0.186	0.06	0.061	0.068	0.205	0.263	0.248	0.111	0.295	0.025	0.032	0.129	0.088	0.17	0.057	0.226	0.209	0.4	0.112	0.071	0.201	0.186	0.771
TCGA.O2.A52Q.01A.11R.A26W.07	0	0.08	0.231	0.1	0.082	0.129	0.219	0.324	0.148	0.018	0.314	0.083	0.032	0.07	0.094	0.303	0.083	0.174	0.328	0.298	0.093	0.121	0.148	0.22	0.814
TCGA.O2.A52S.01A.11R.A262.07	0	0.108	0.169	0.073	0.093	0.087	0.199	0.304	0.292	0.025	0.227	0.067	0.046	0.129	0.098	0.241	0.121	0.174	0.237	0.345	0.162	0.096	0.119	0.161	0.77
TCGA.O2.A52V.01A.31R.A262.07	0	0.091	0.12	0.034	0.131	0.024	0.139	0.202	0.259	0.084	0.195	0.091	0.004	0.208	0.065	0.265	0.155	0.232	0.252	0.209	0.123	0.051	0.177	0.122	0.759
TCGA.O2.A52W.01A.11R.A26W.07	0	0.105	0.152	0.005	0.067	0.119	0.206	0.201	0.21	0.154	0.196	0	0.036	0.122	0.067	0.198	0.124	0.243	0.207	0.322	0.145	0.094	0.115	0.195	0.764
TCGA.O2.A5IB.01A.11R.A27Q.07	0.022	0.161	0.032	0	0.07	0.078	0.088	0.142	0.251	0.111	0.185	0.082	0.026	0.051	0.086	0.112	0.136	0.198	0.11	0.057	0.193	0.087	0.141	0.191	0.562
TCGA.XC.AA0X.01A.32R.A405.07	0	0.084	0.198	0.011	0.165	0.06	0.232	0.141	0.224	0.115	0.36	0.089	0	0.146	0.099	0.207	0.133	0.187	0.243	0.348	0.102	0.069	0.215	0.201	0.807
